# Supplementary material for: Model-Based Analysis of SARS-CoV-2 Infections, Hospitalization and Outcome in Germany, the Federal States and Districts
Source: MDPI journal article supplement (doi:10.3390/v14102114), 2022-09-24

# Baden-Wuerttemberg

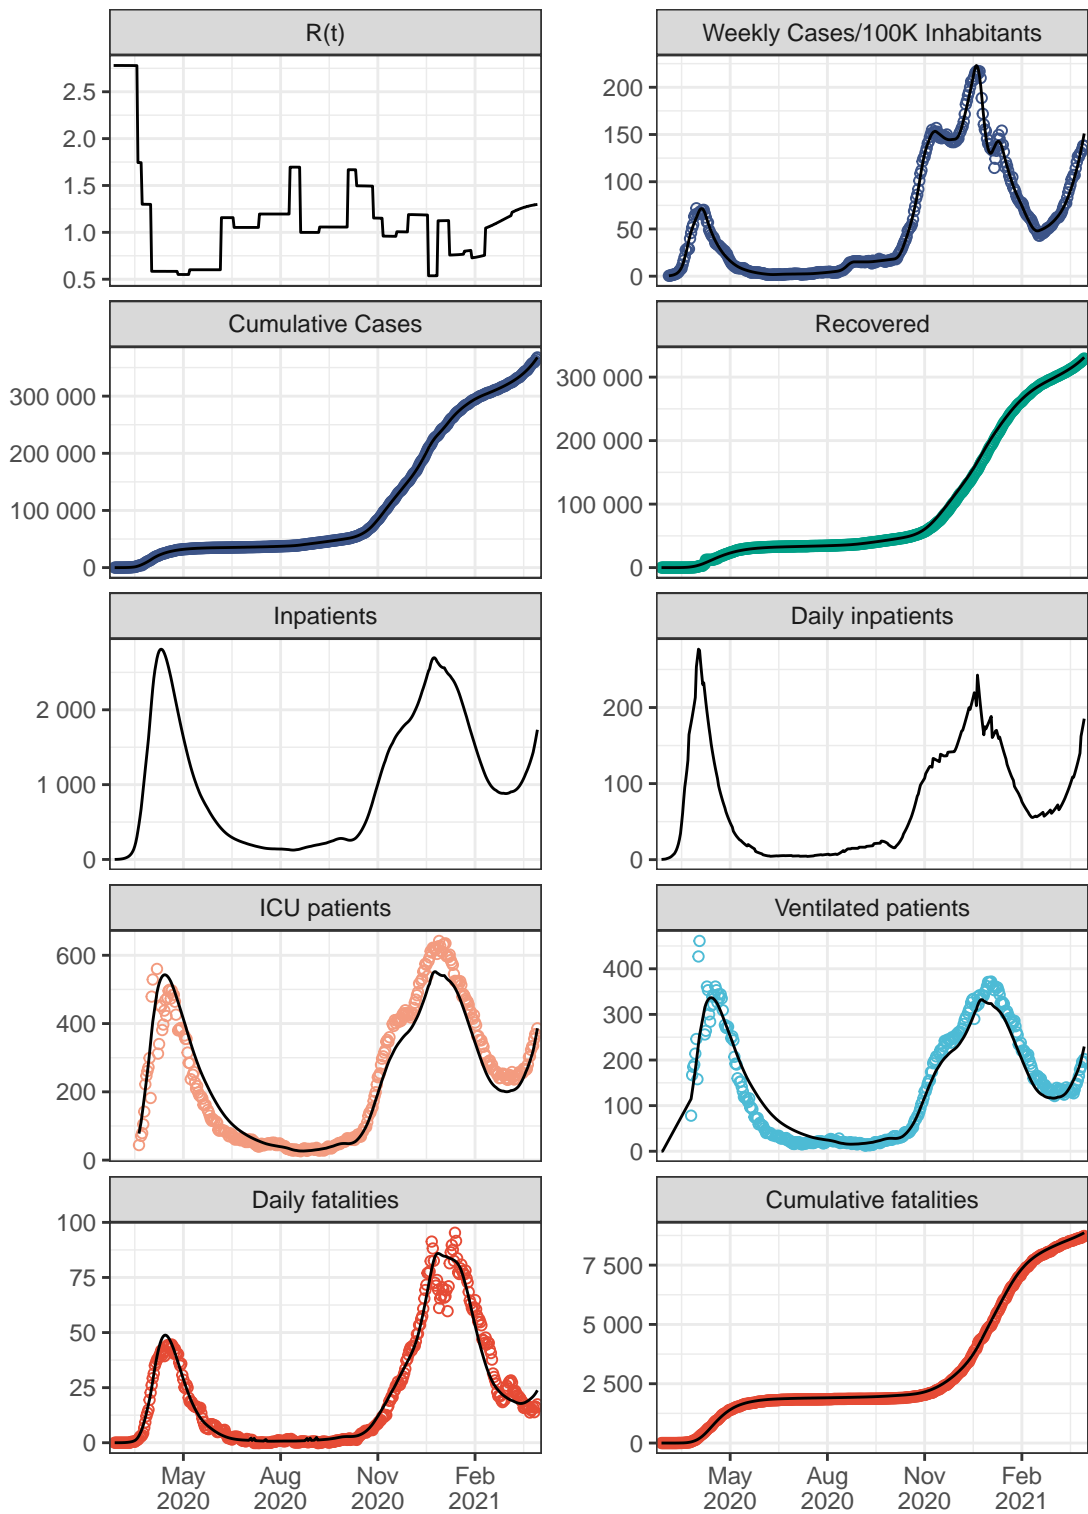

# Bavaria

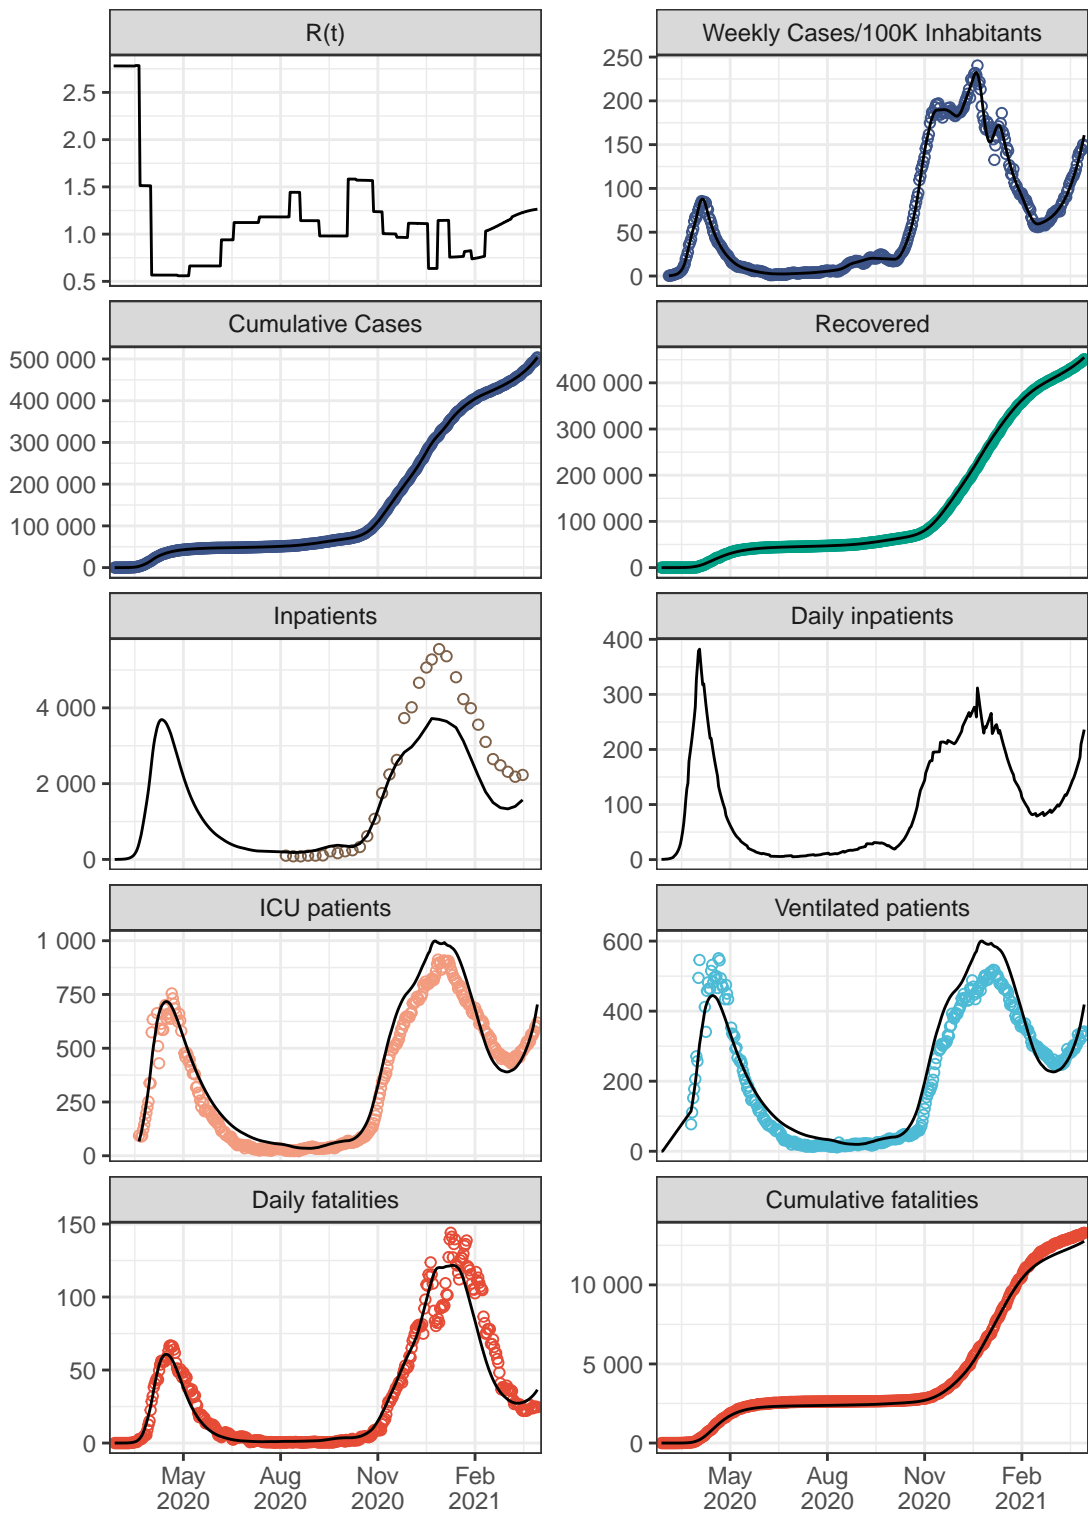

# Berlin

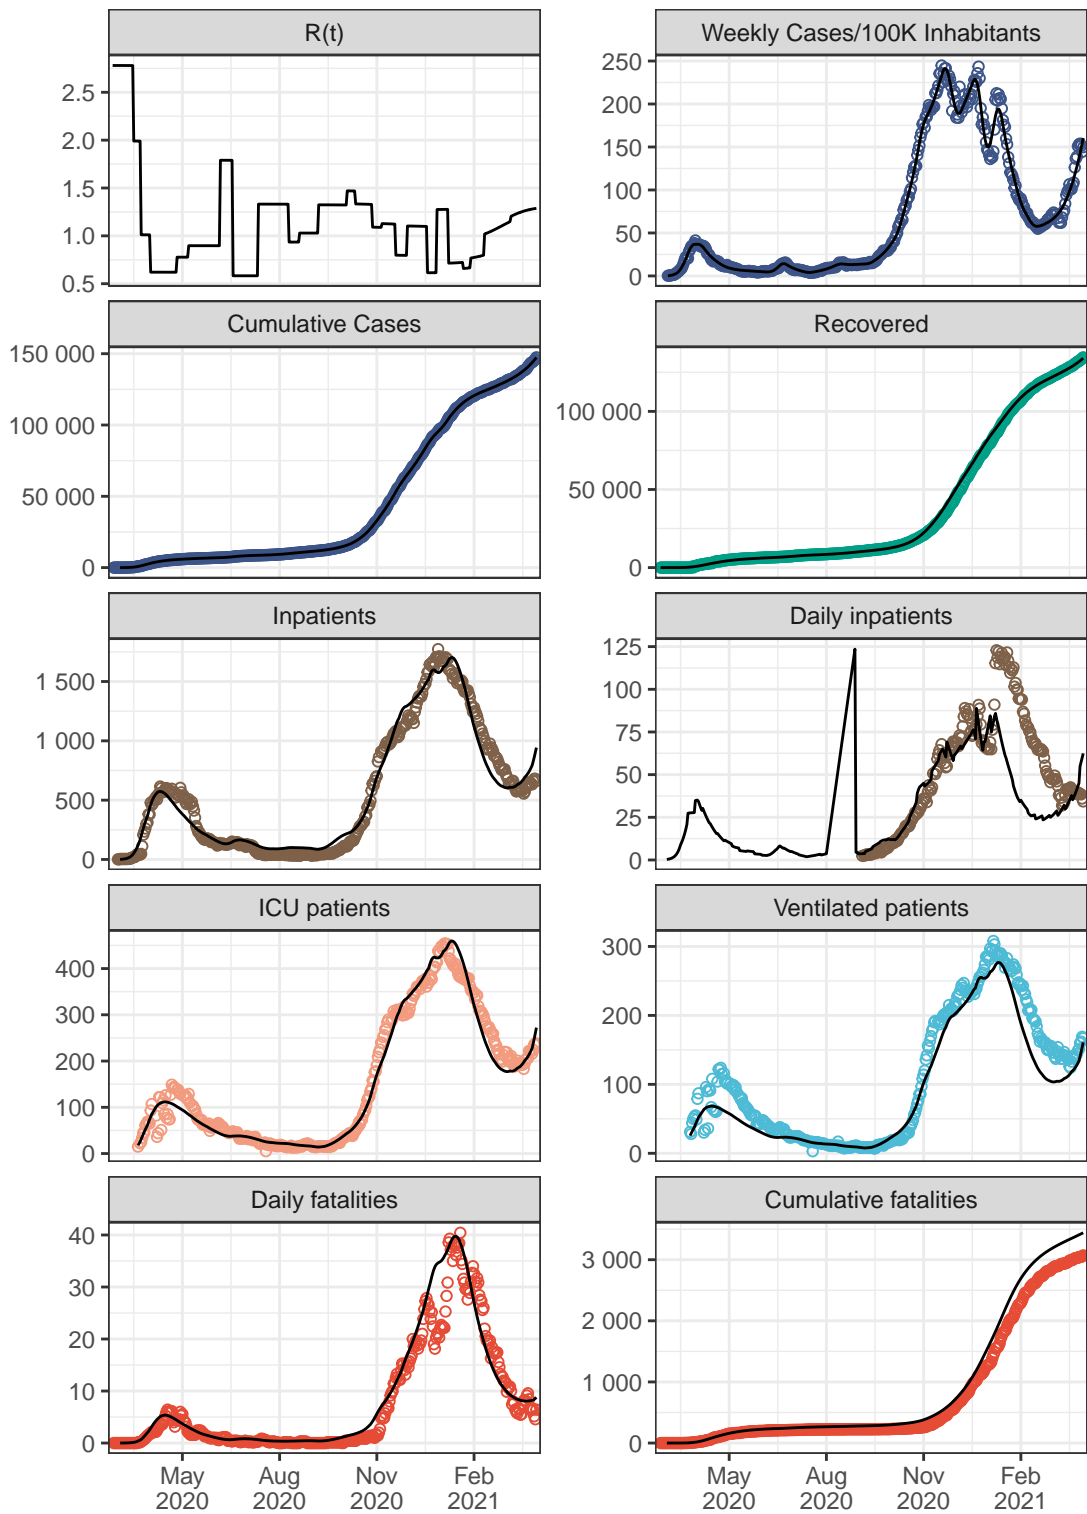

# Brandenburg

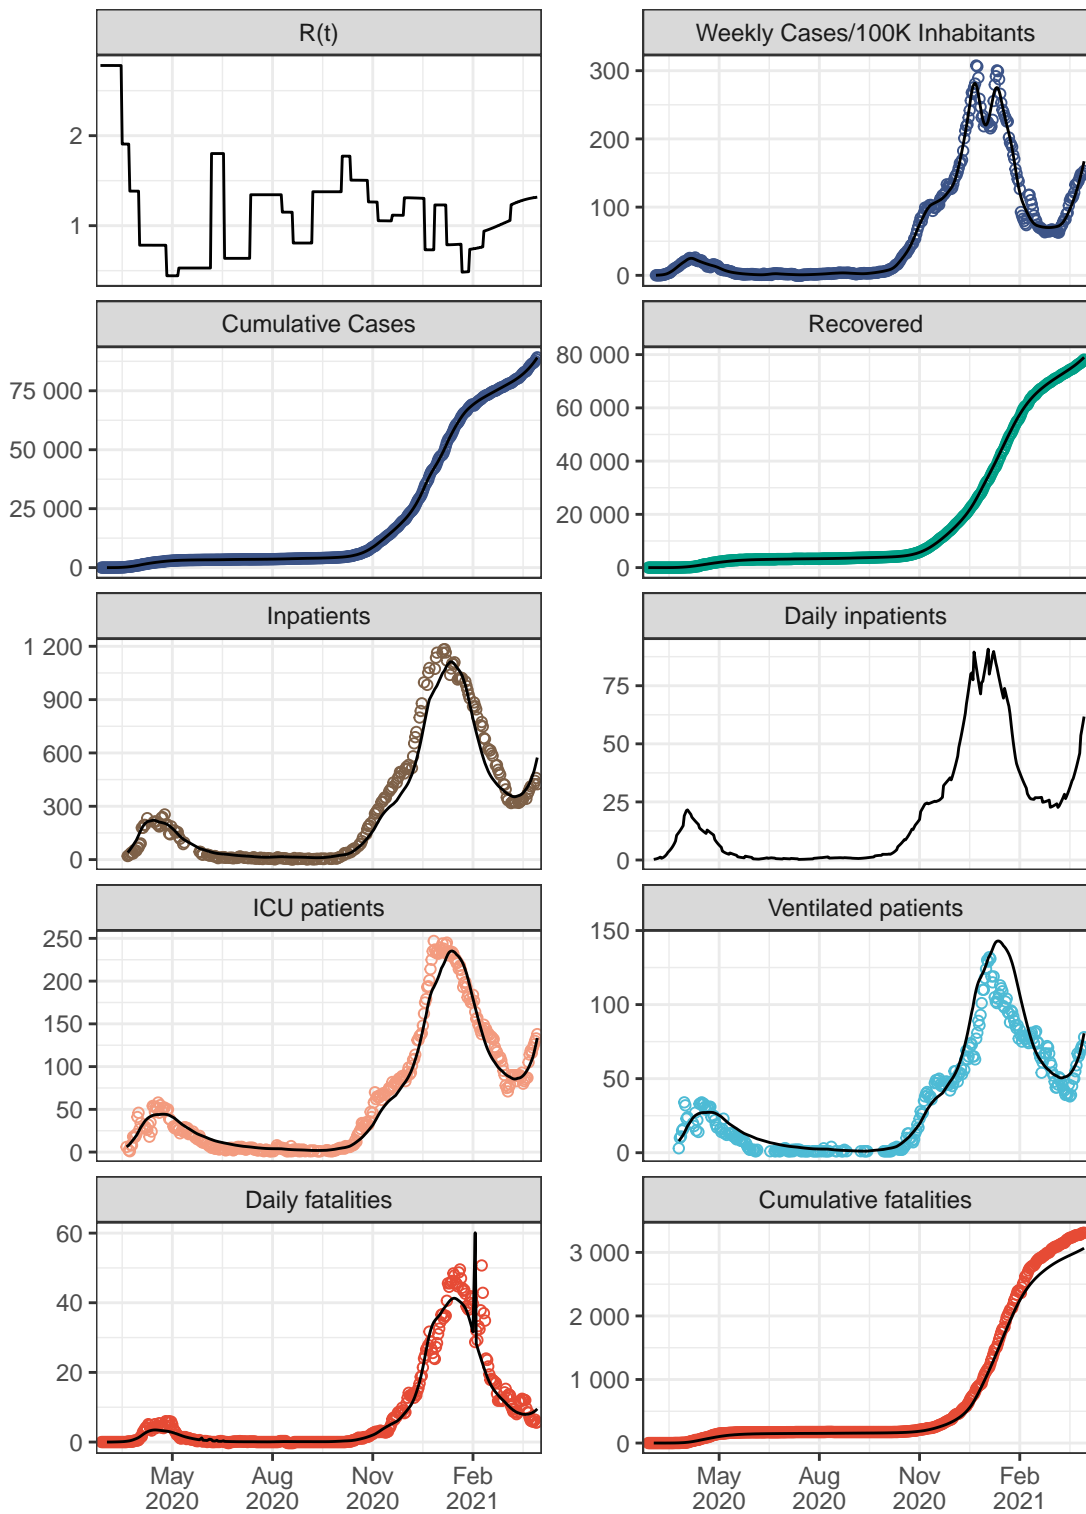

# Bremen

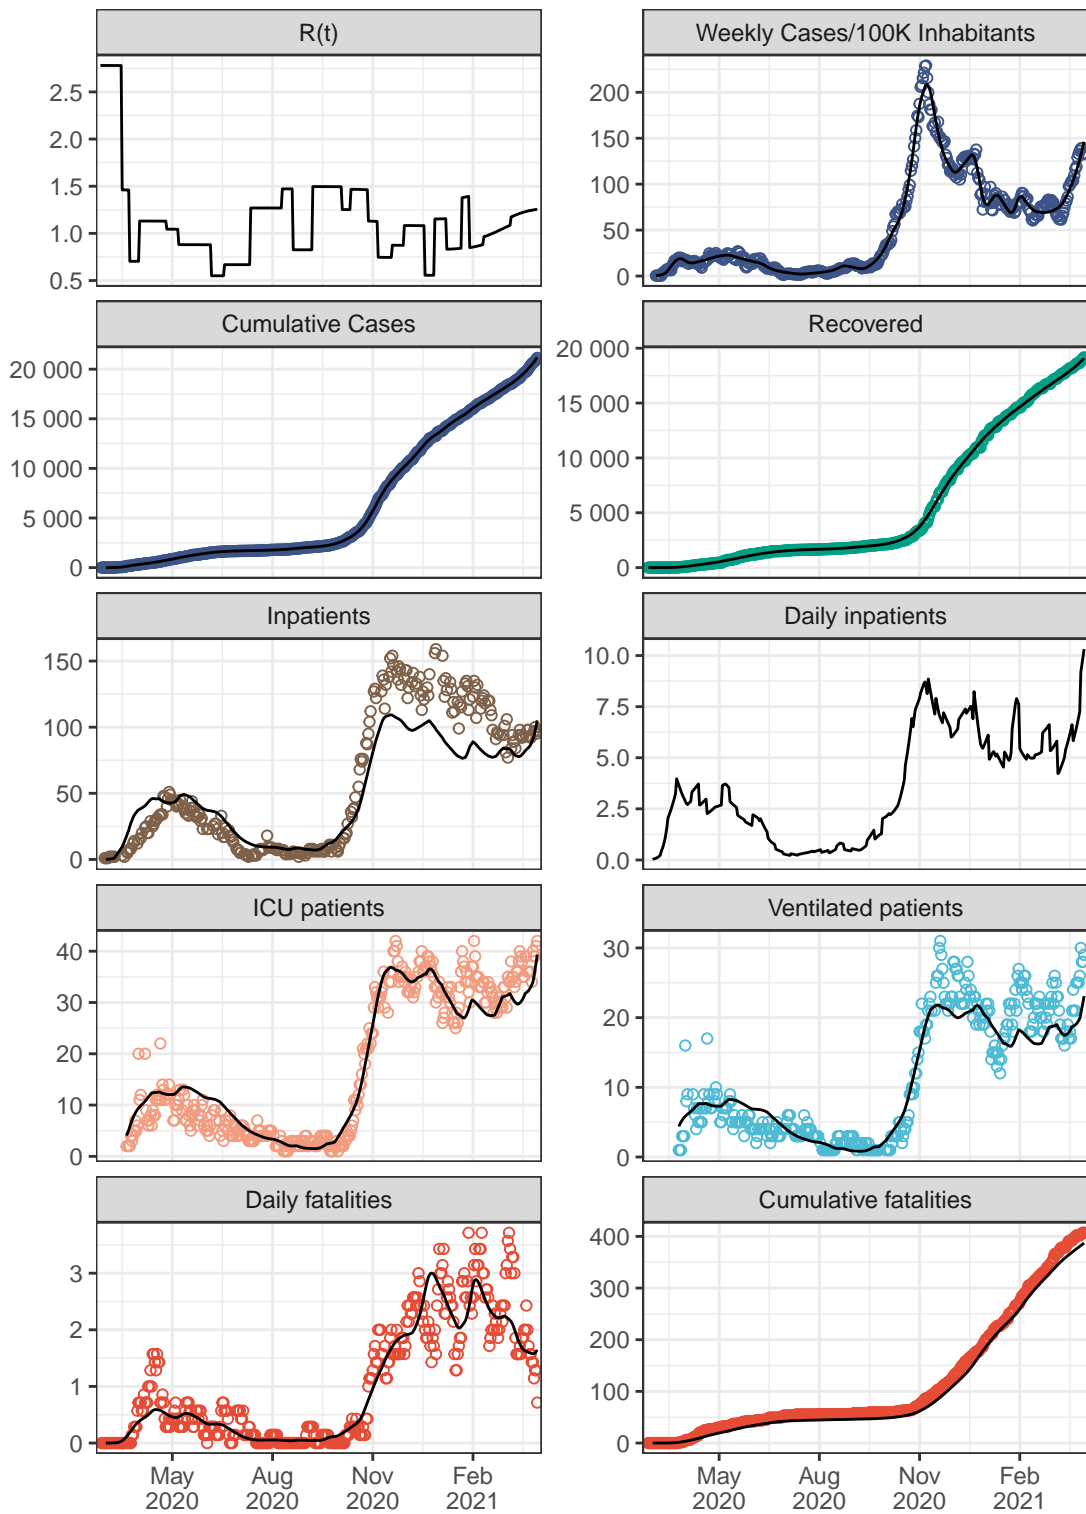

# Hamburg

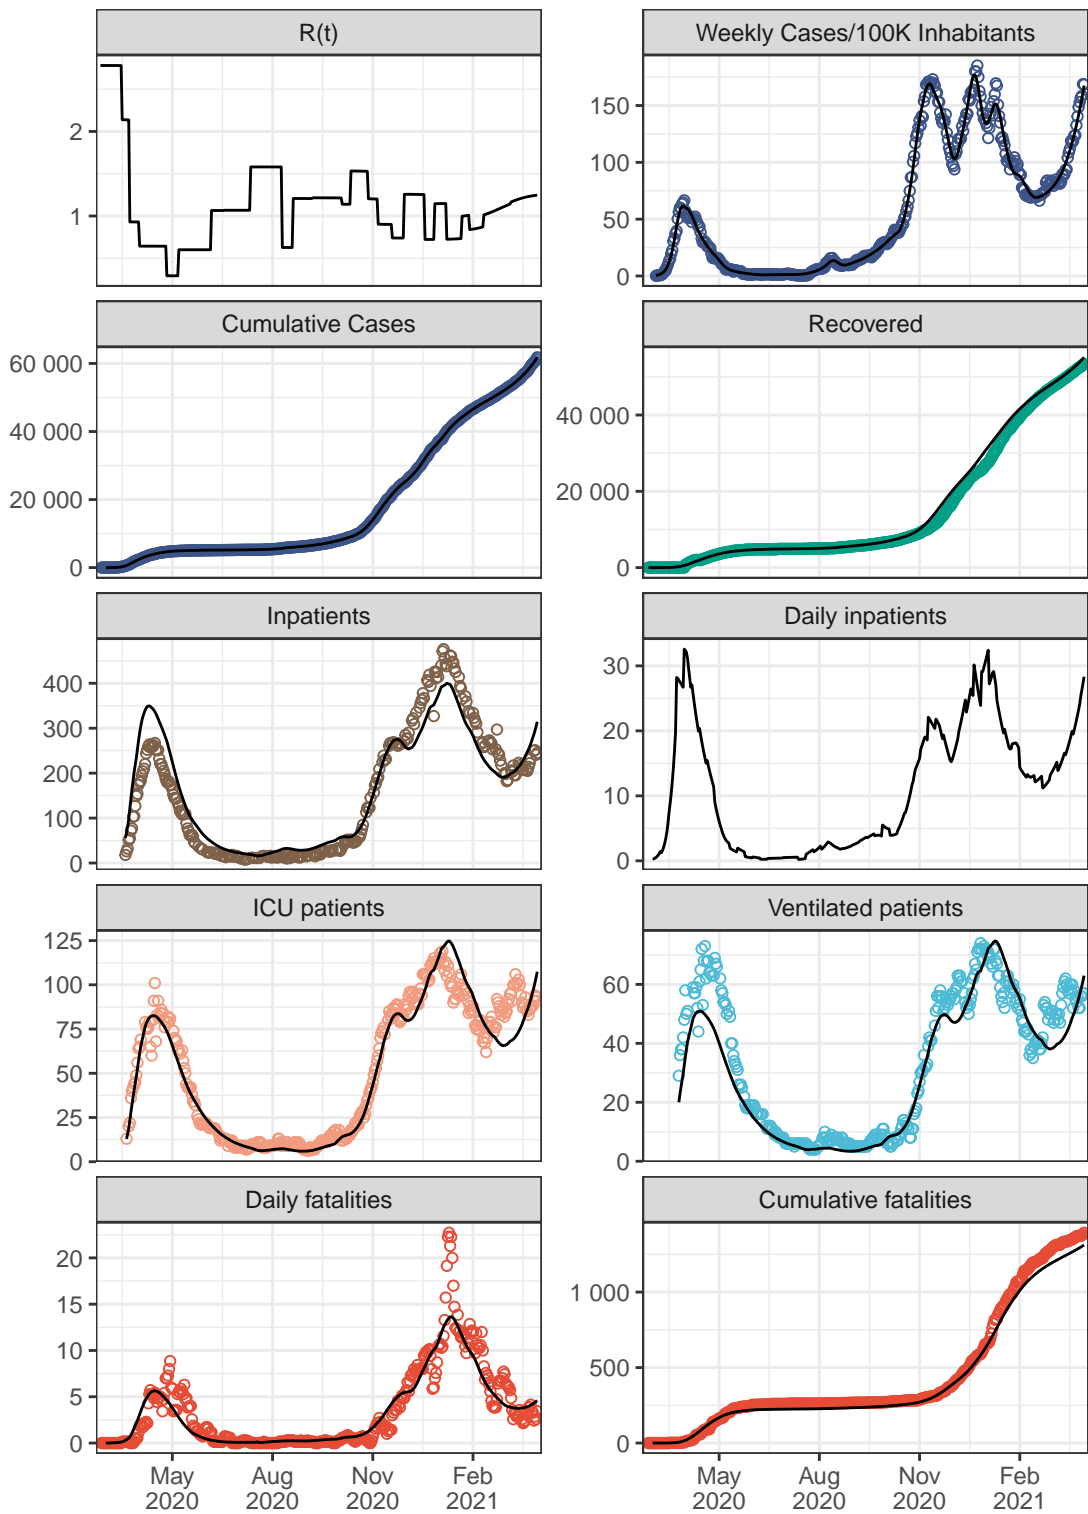

# Hesse

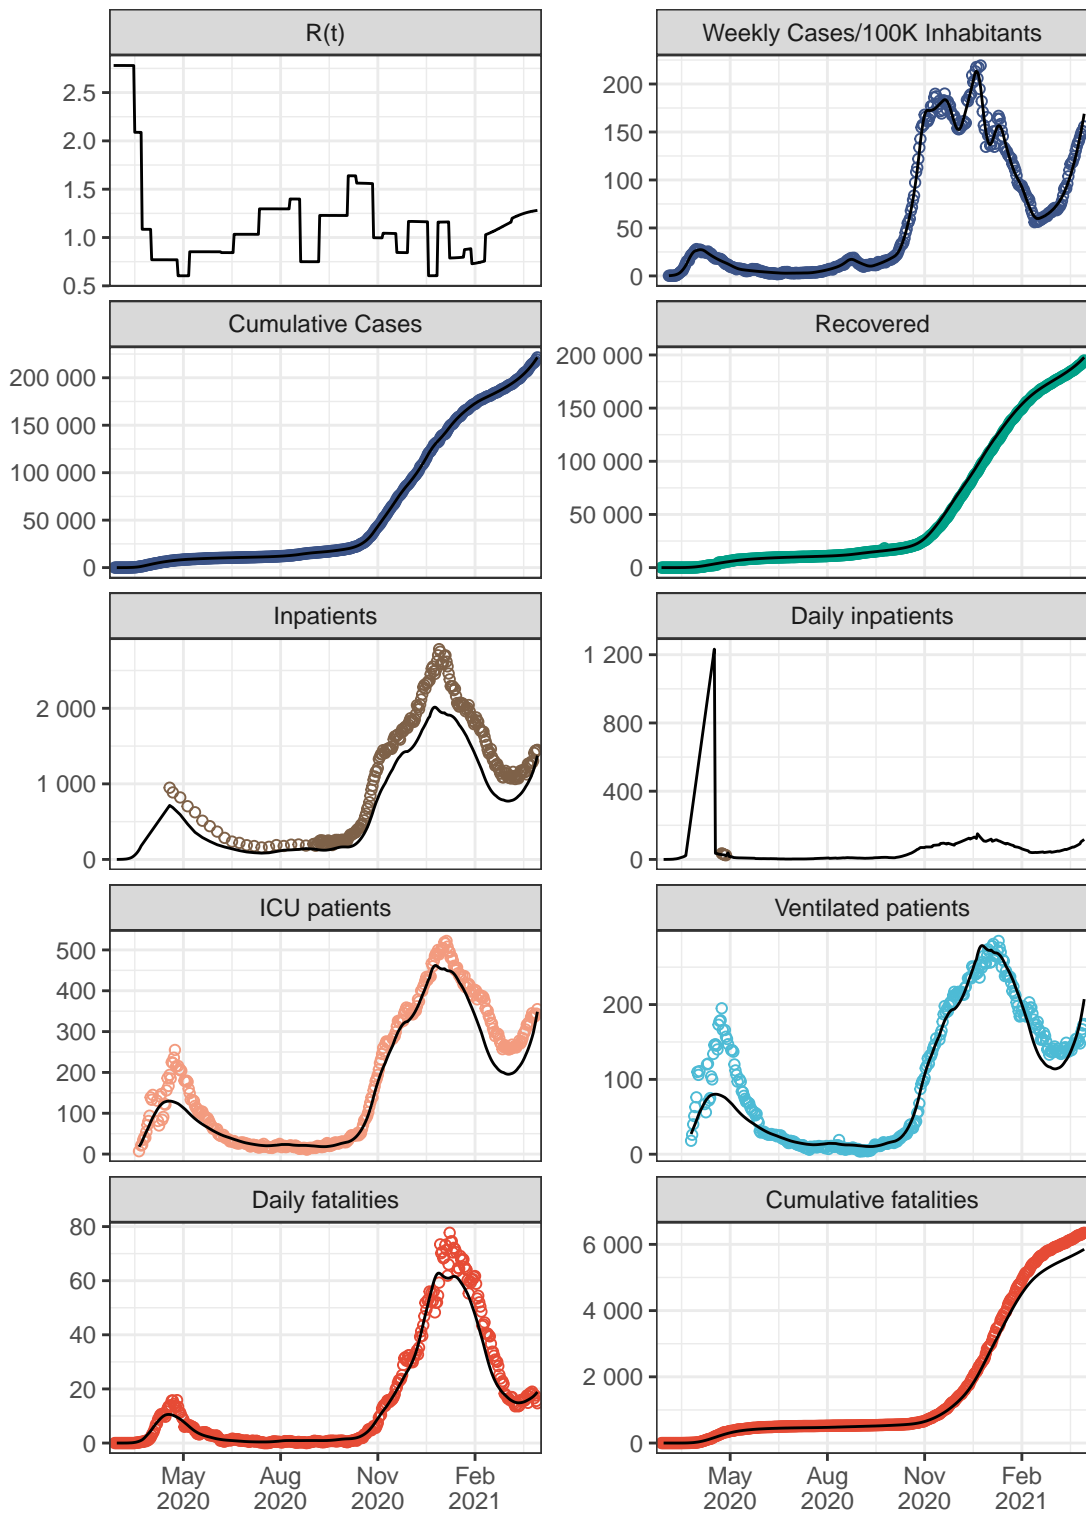

# Mecklenburg–Vorpommern

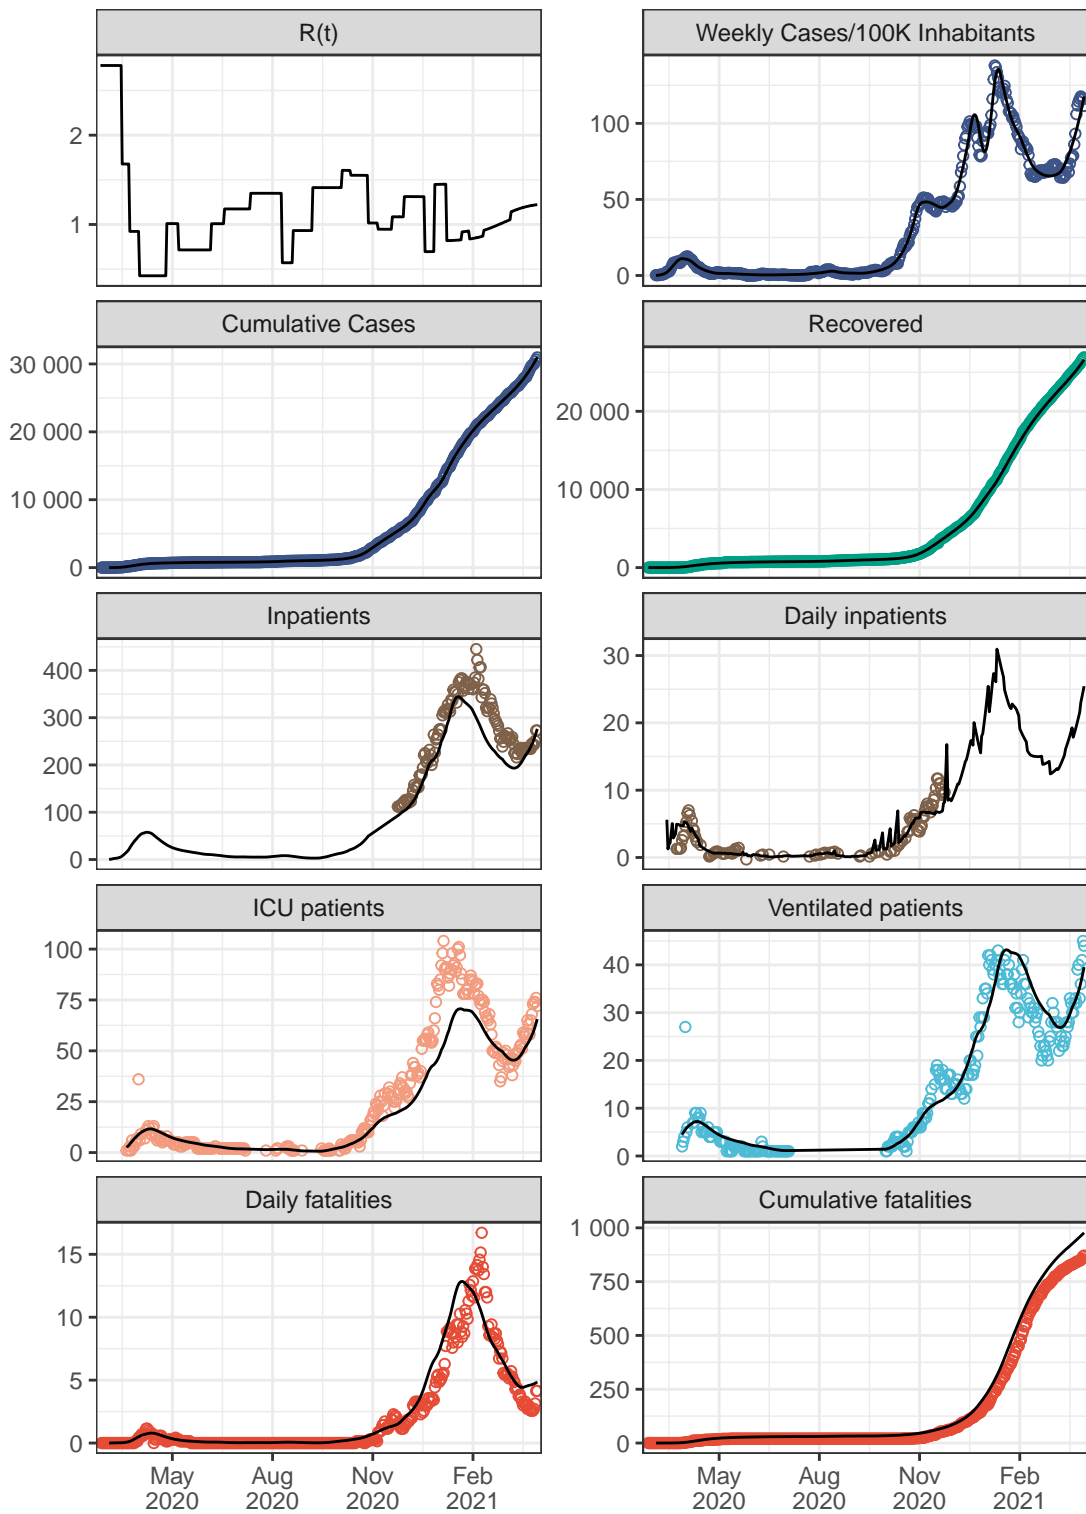



# Lower Saxony

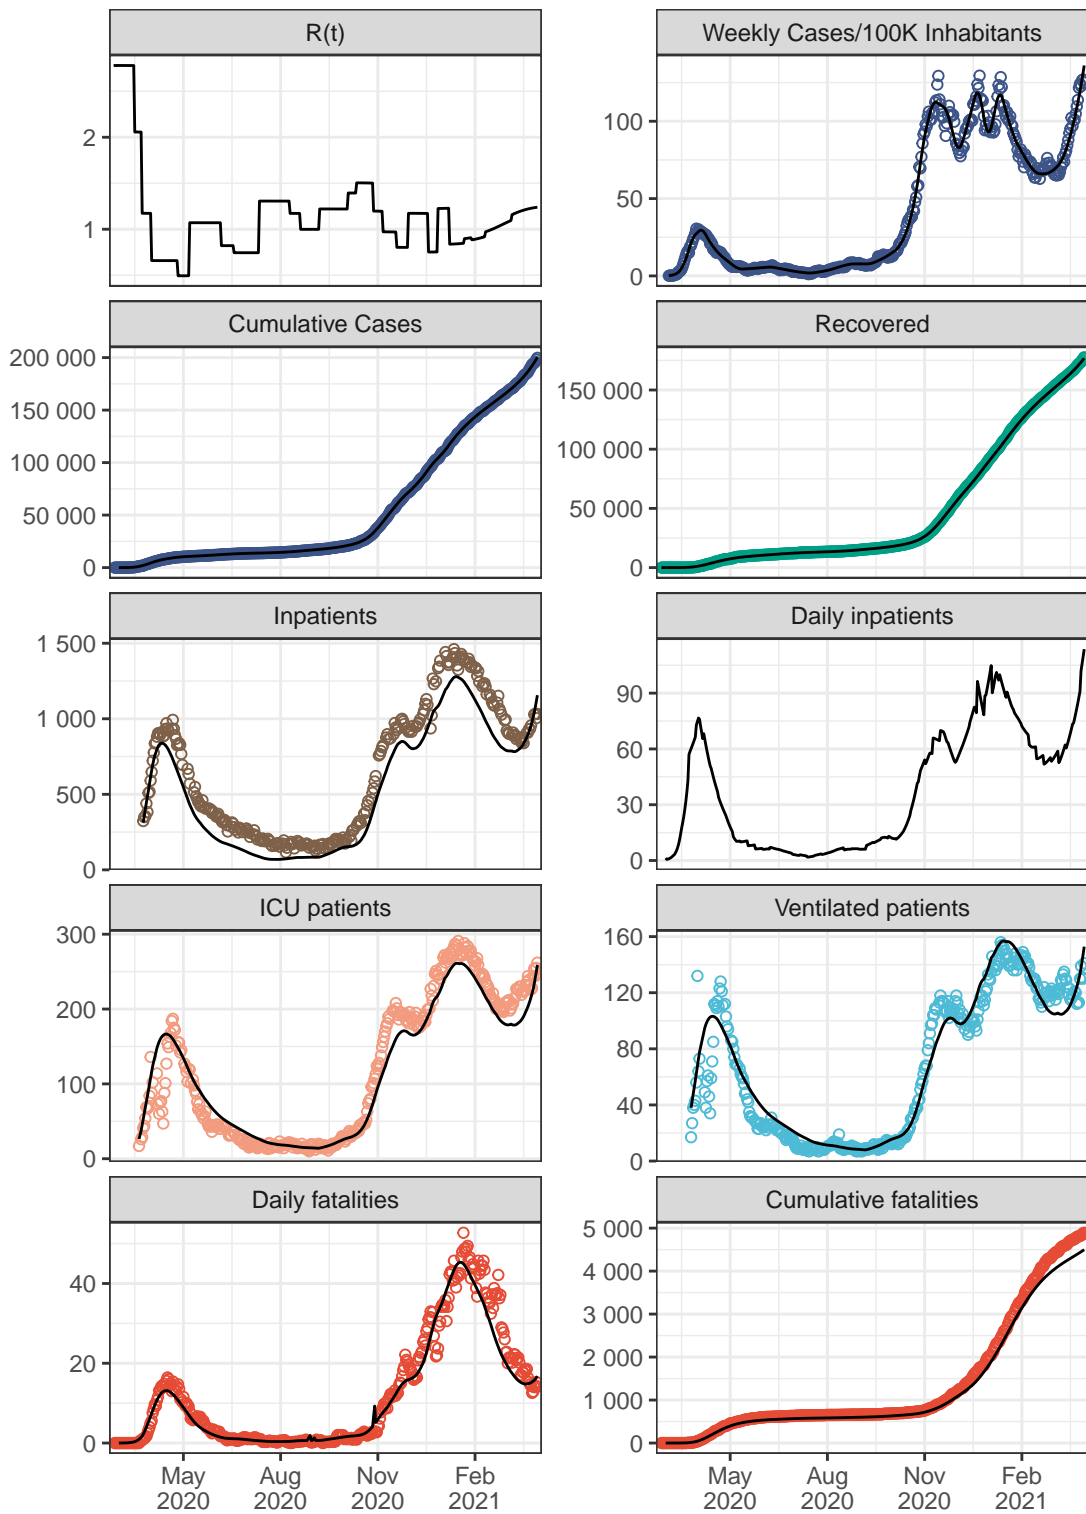

# North Rhine–Westphalia

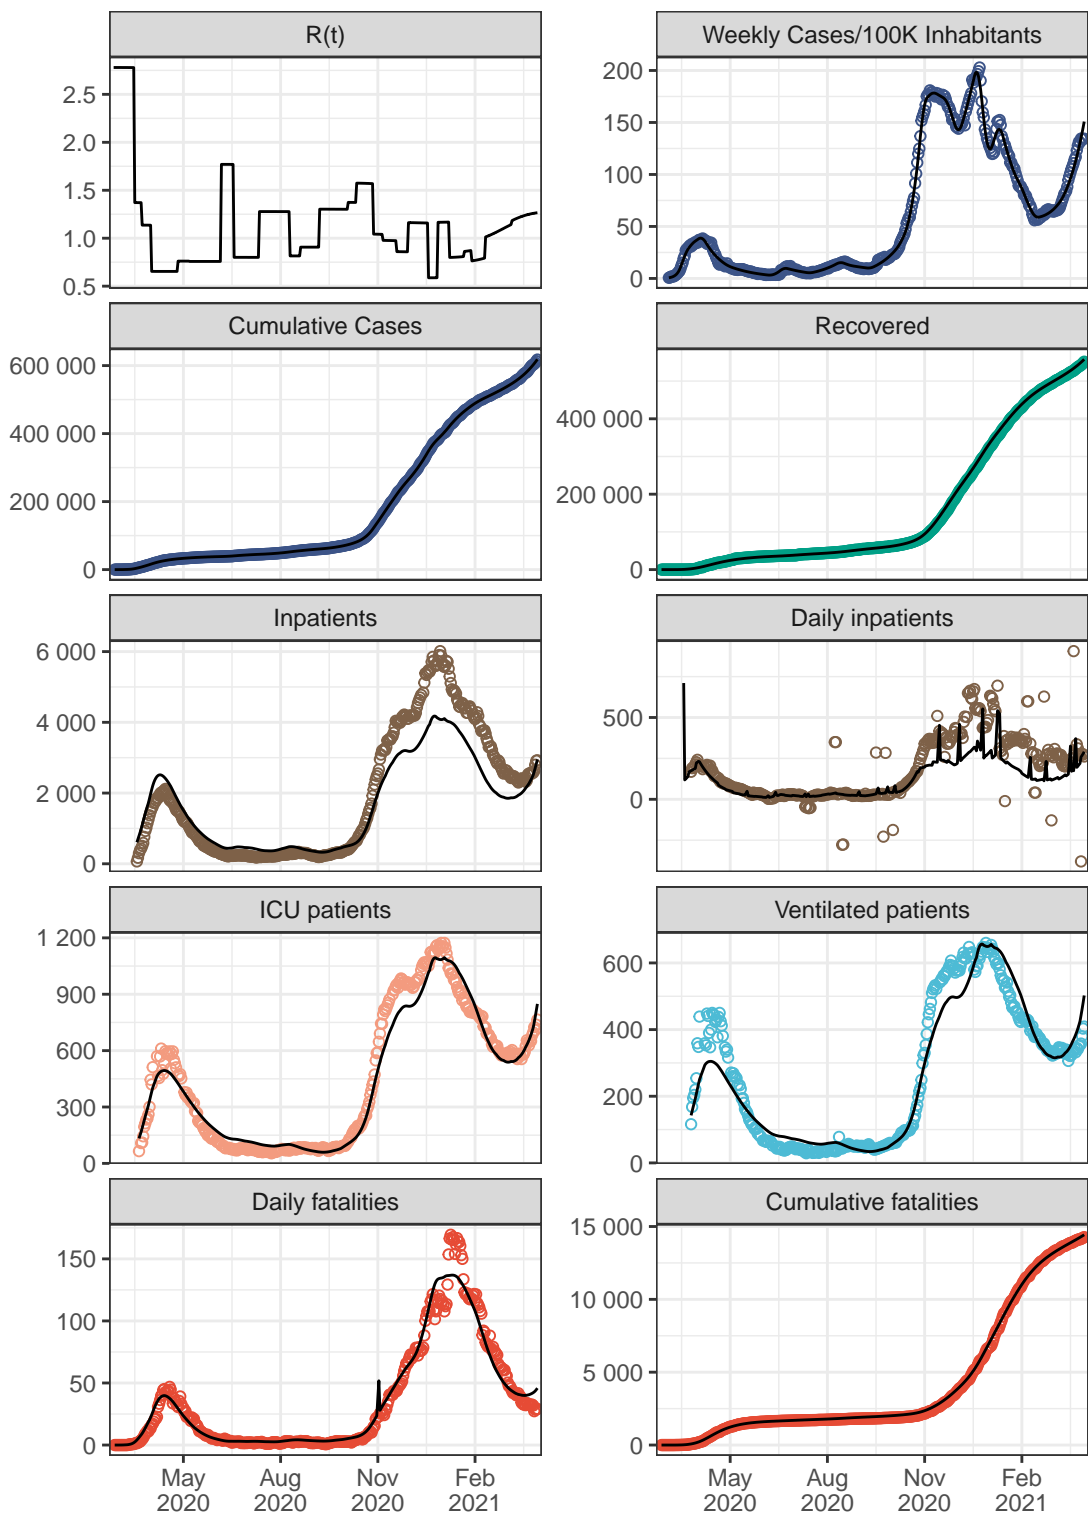

# Rhineland-Palatinate

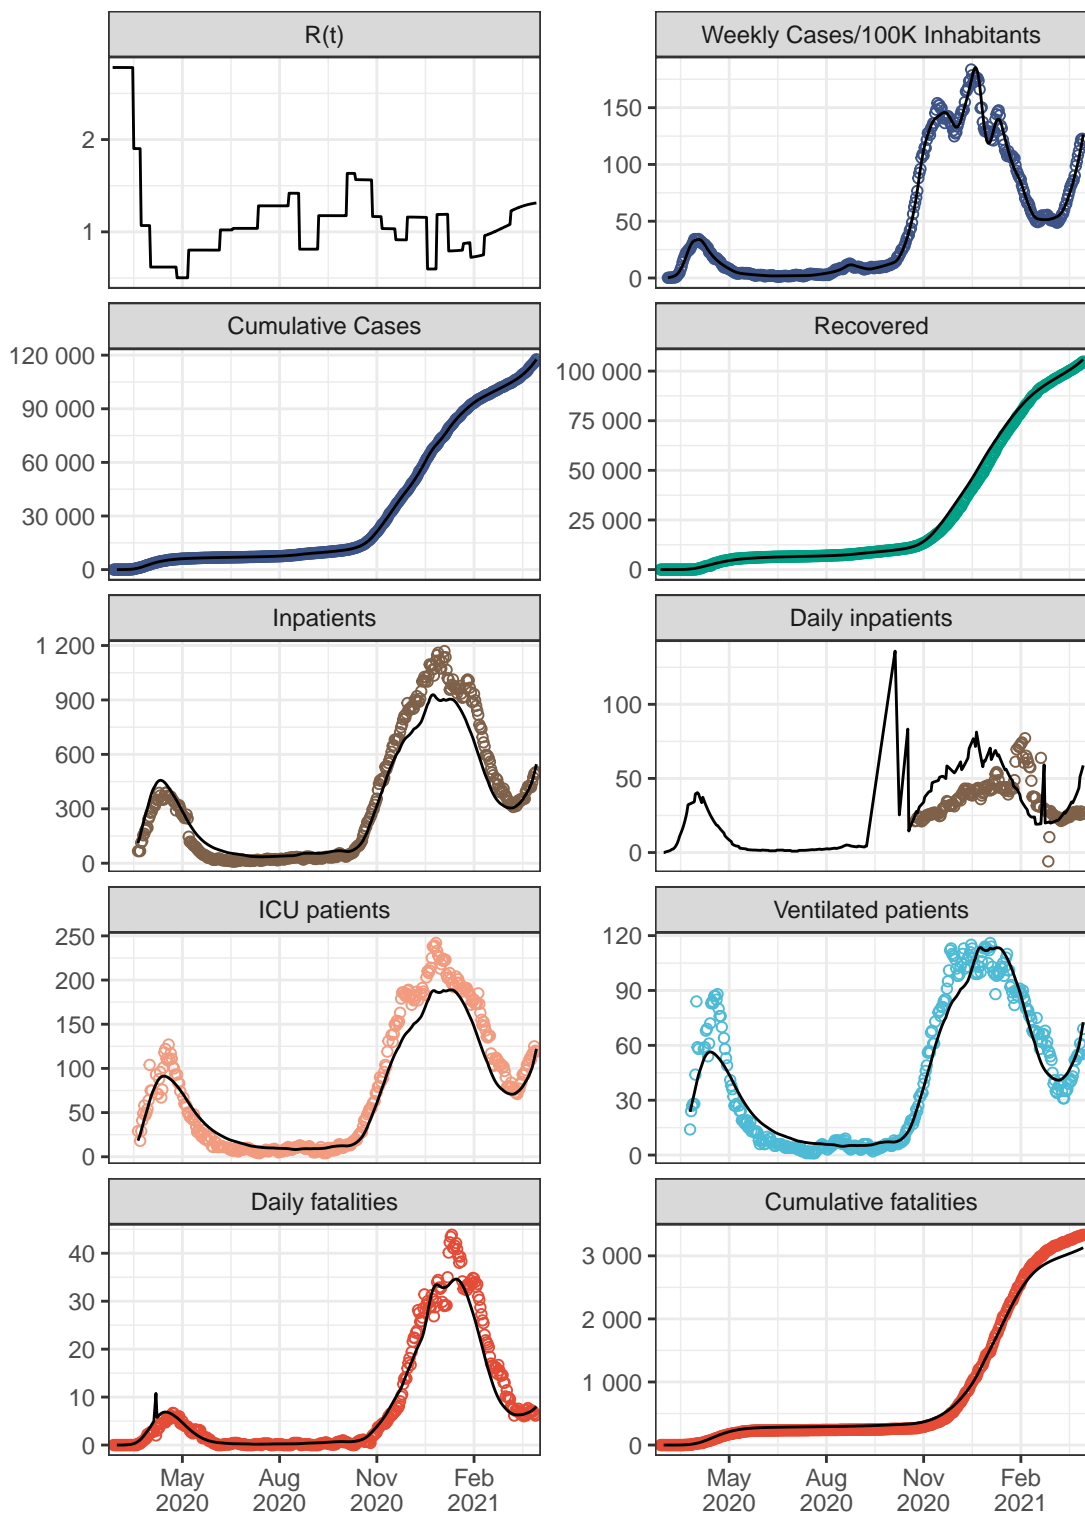

# Saarland

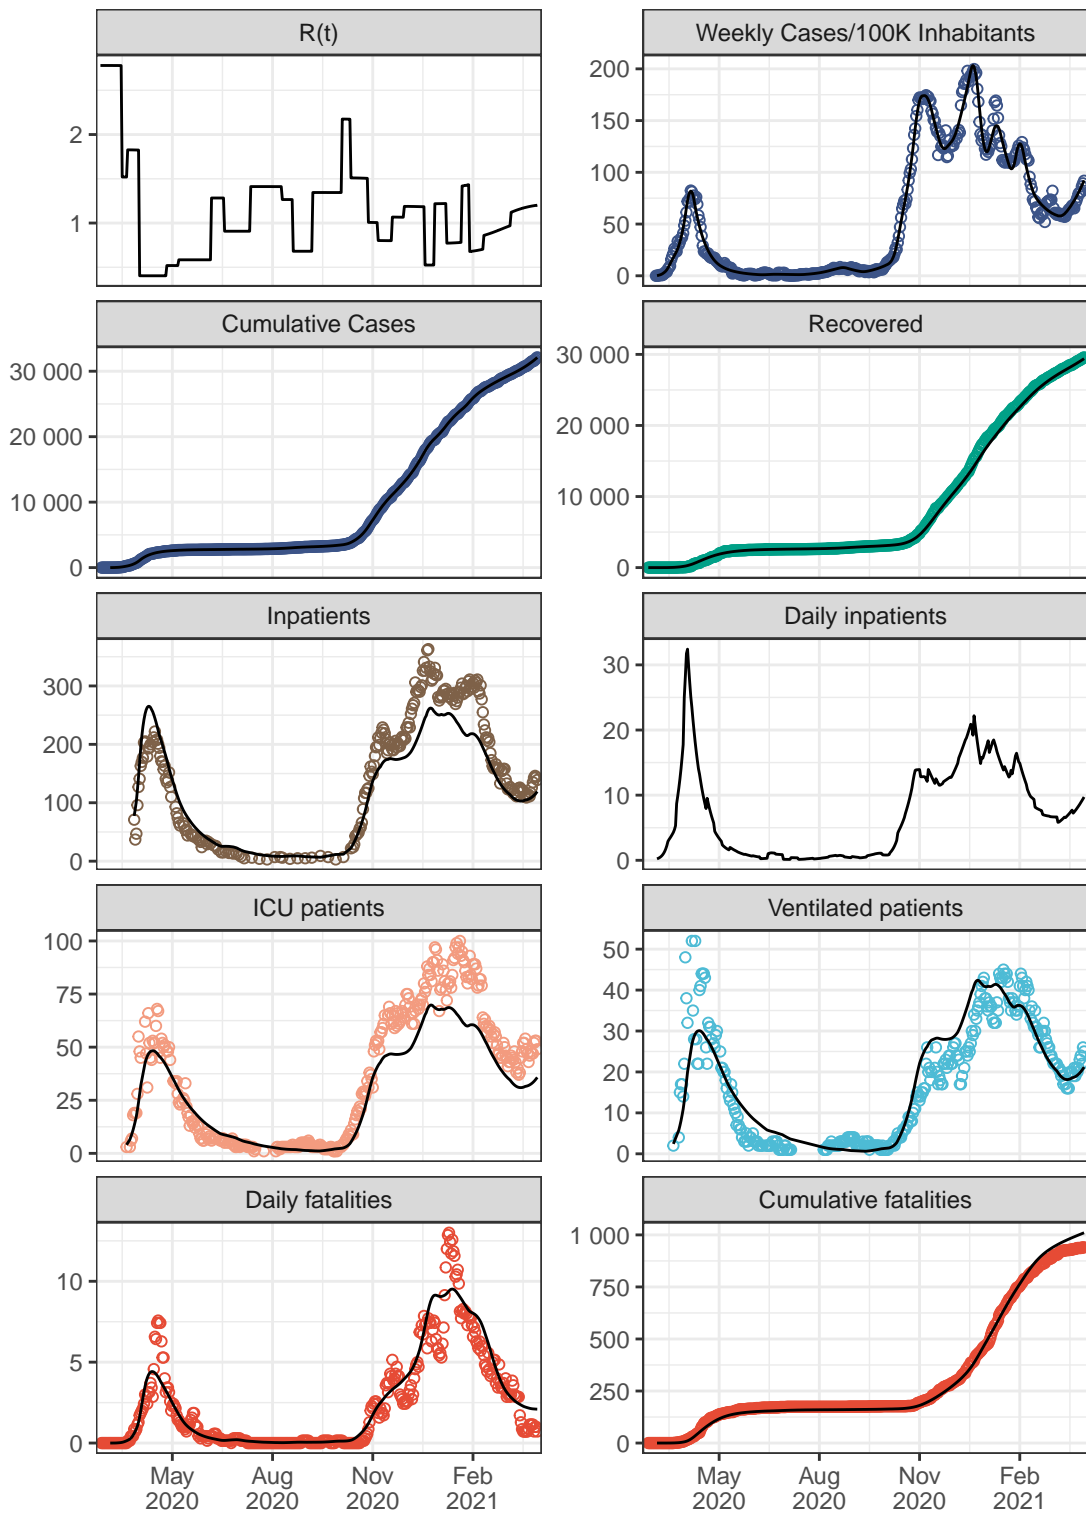

# Saxony

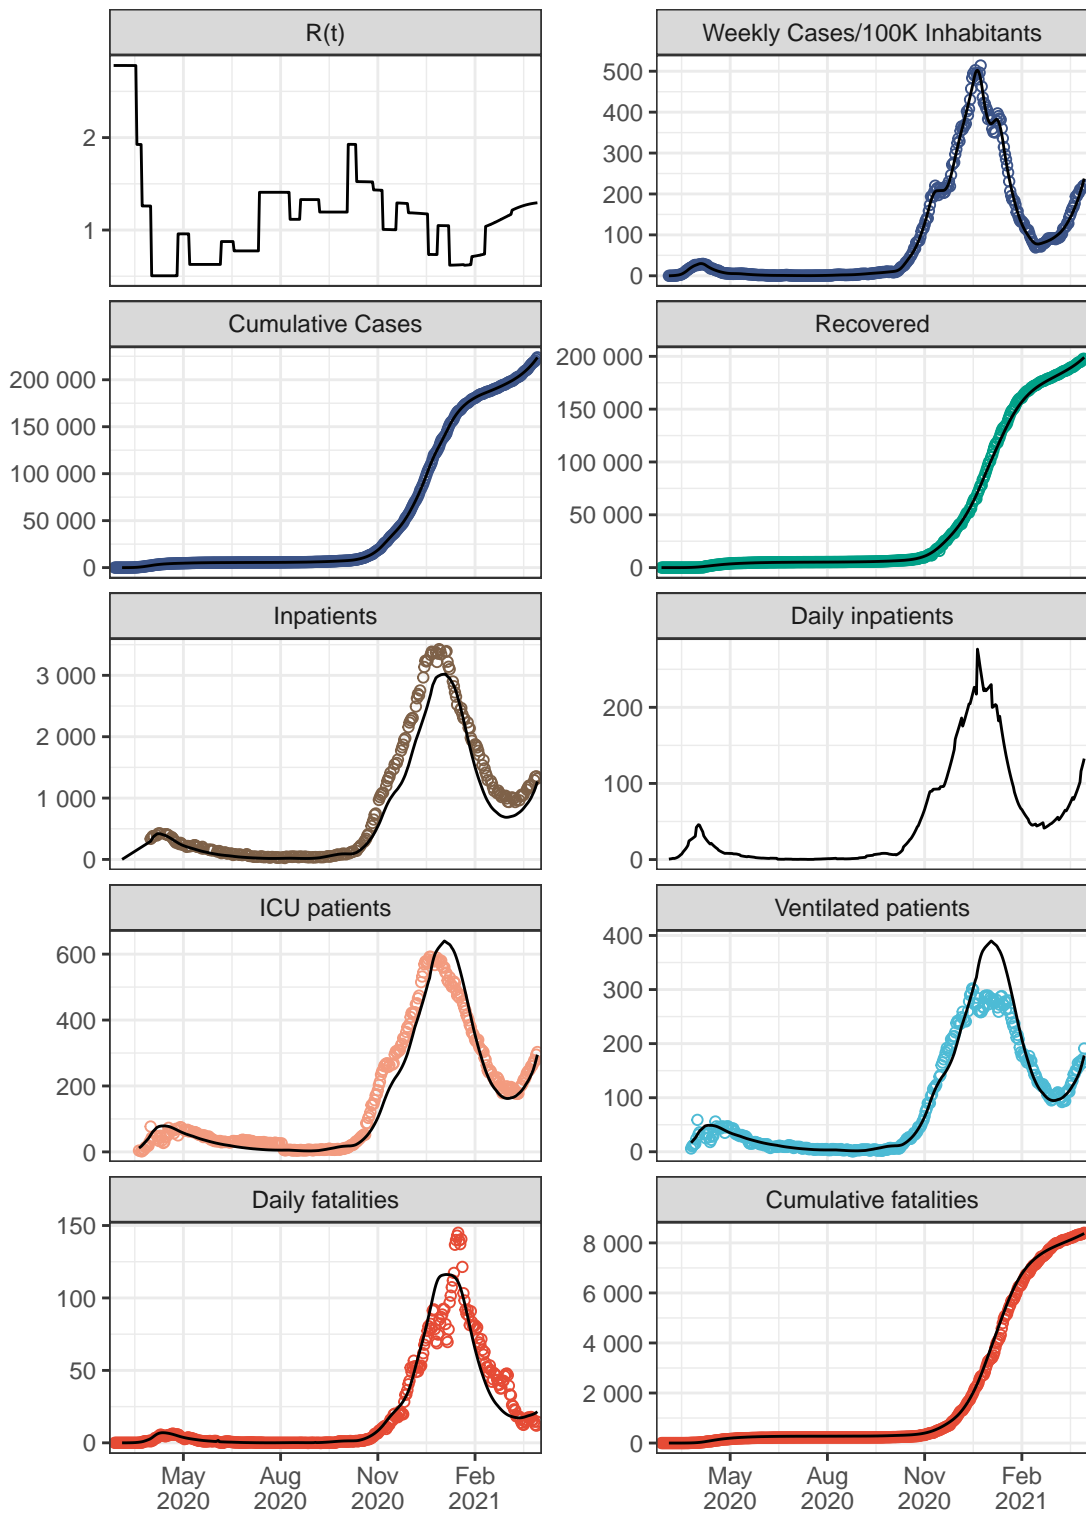

# Saxony-Anhalt

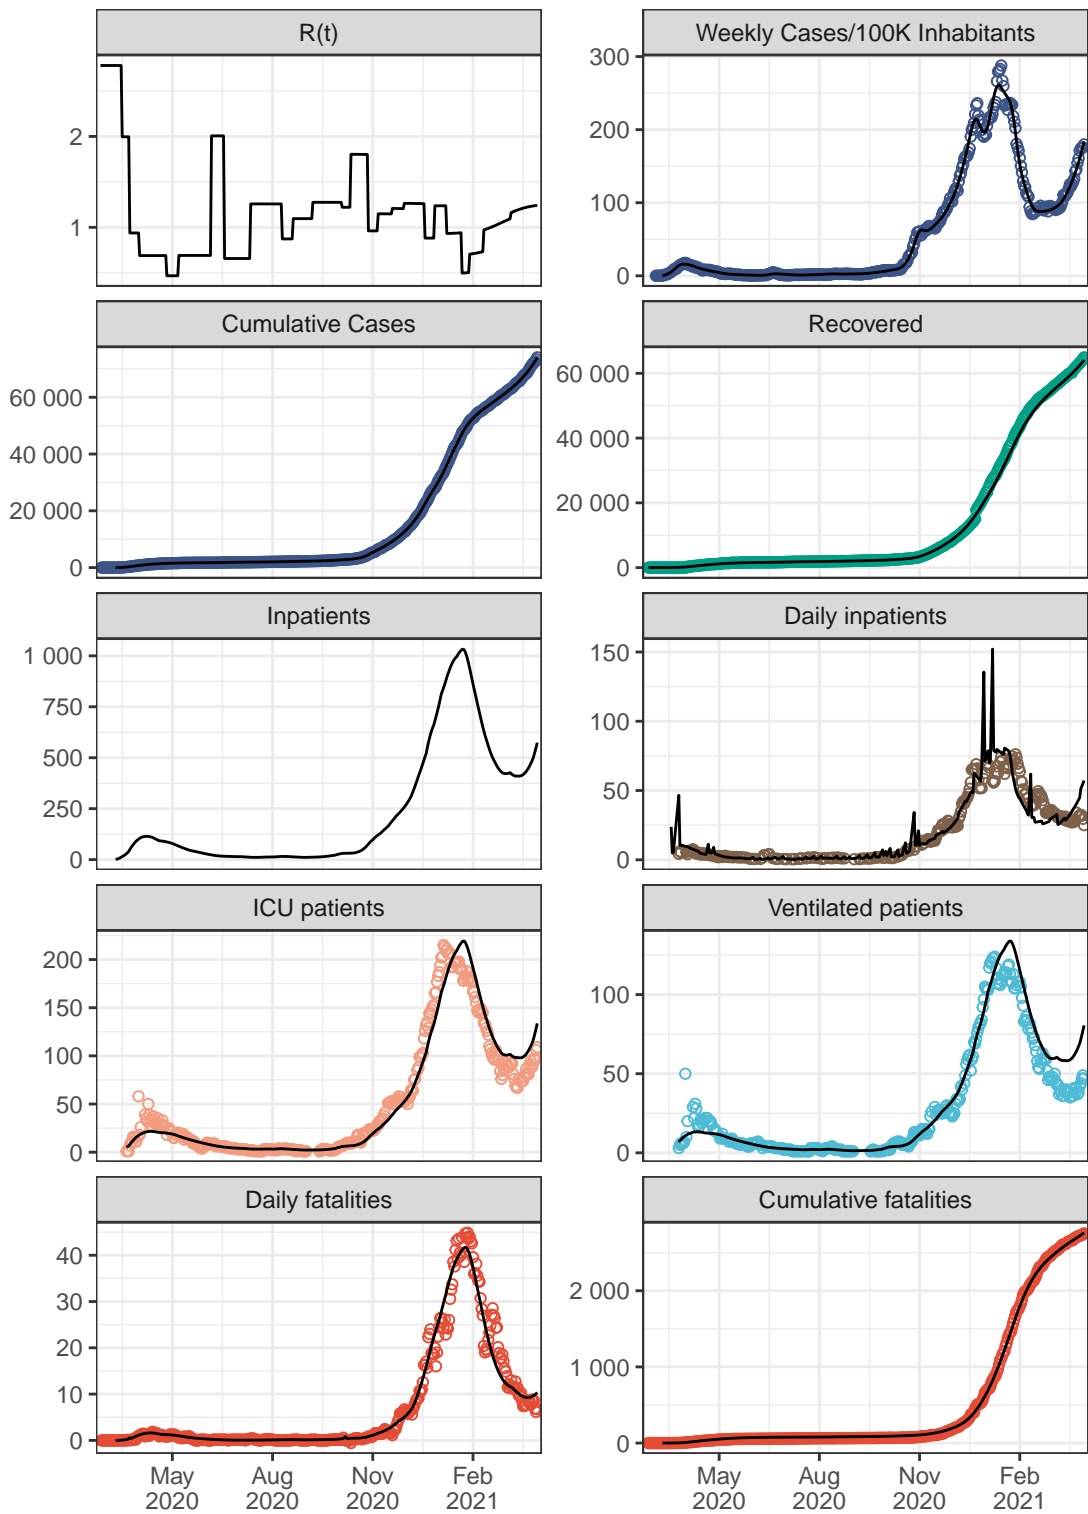

# Schleswig-Holstein

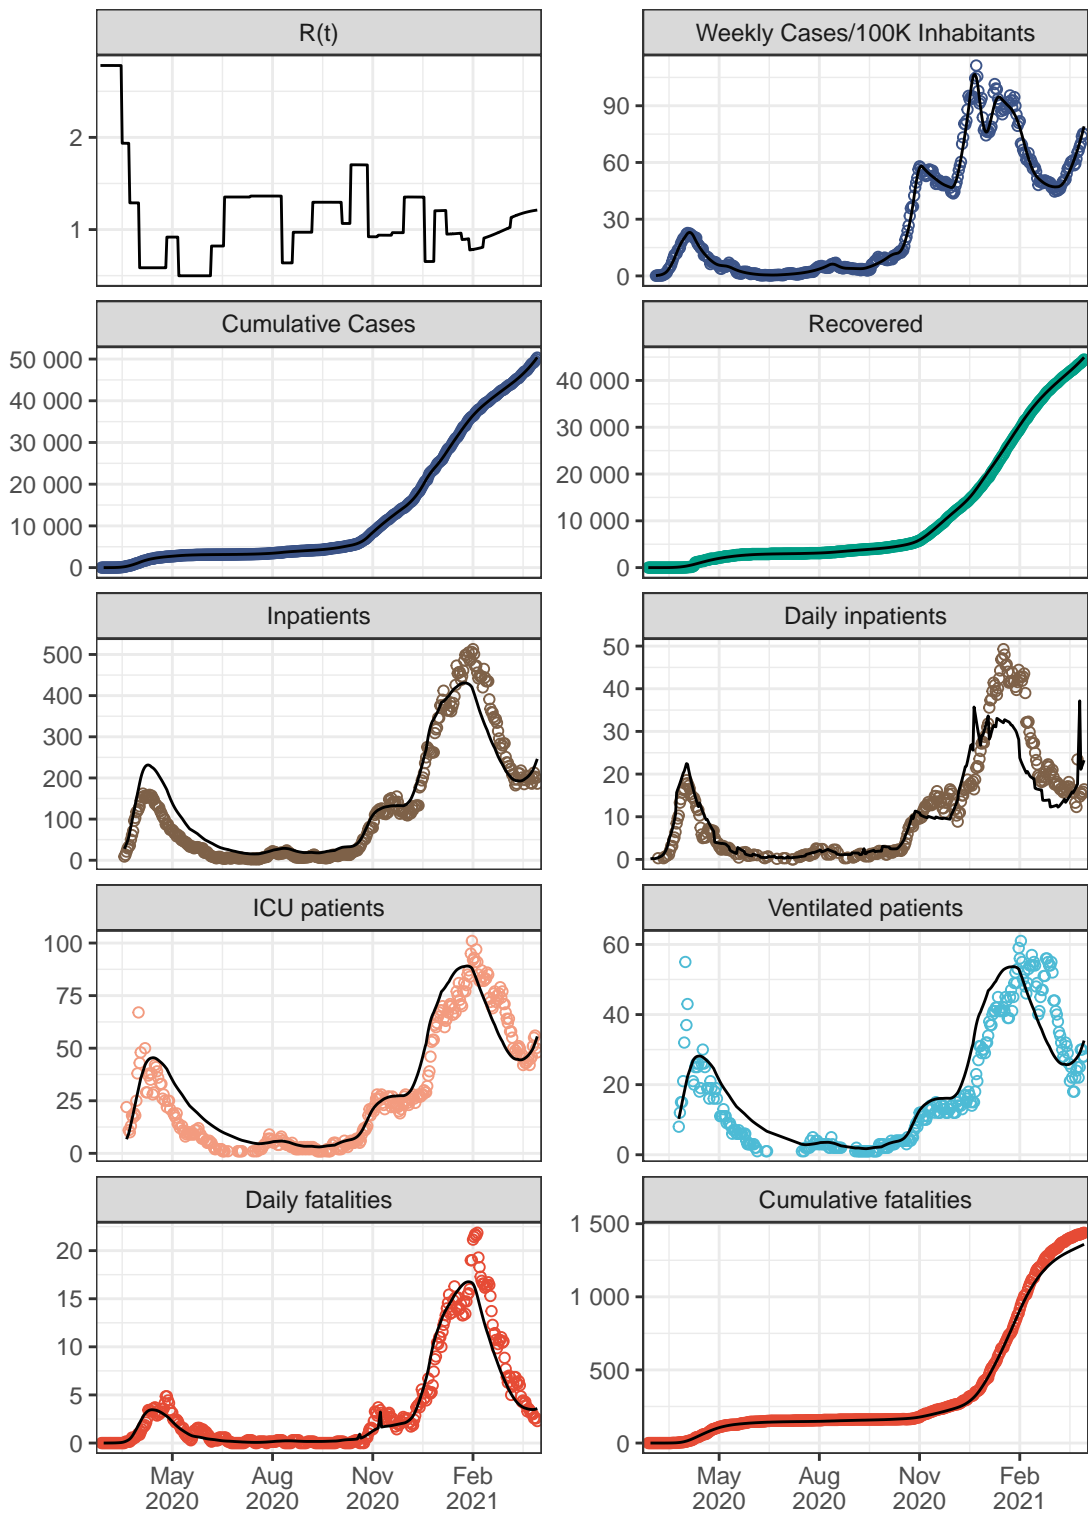

# Thuringia

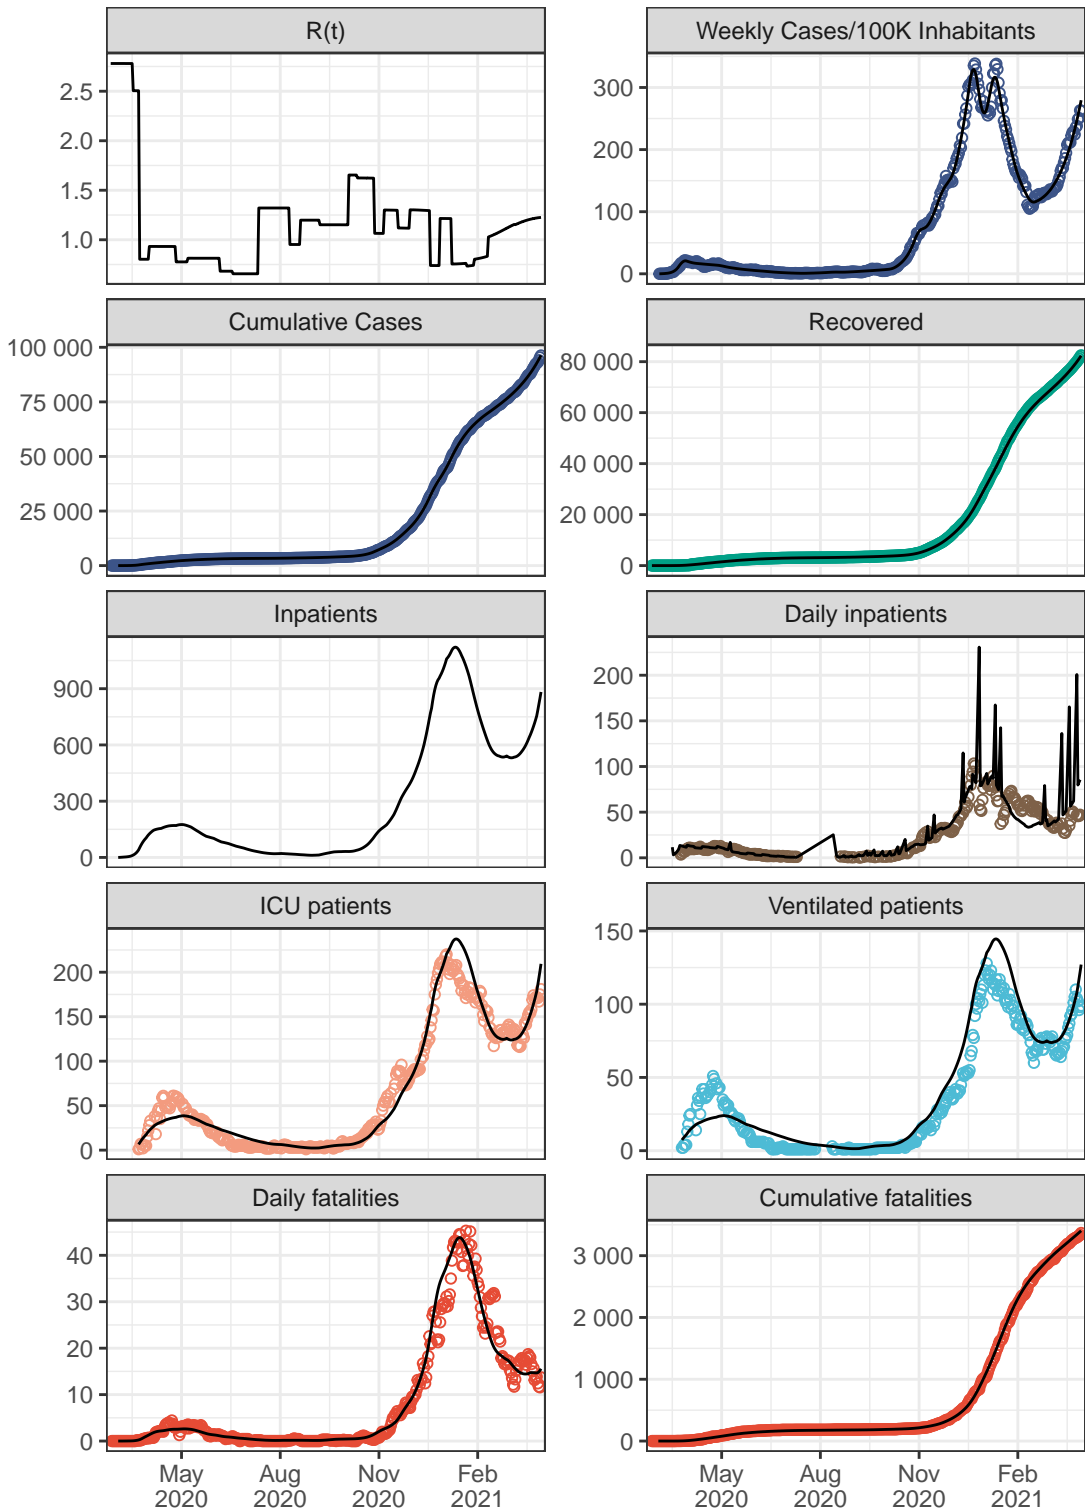



# Germany

$R(t)$

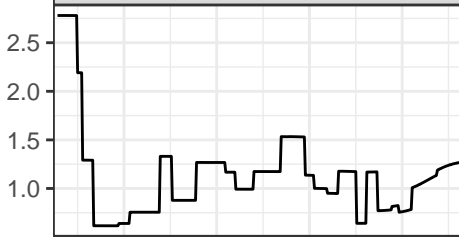

Weekly Cases/100K Inhabitants

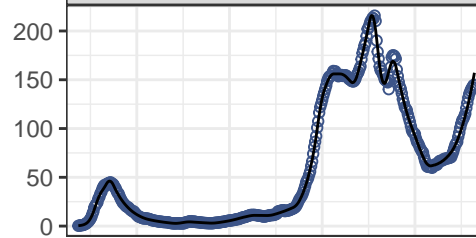

Cumulative Cases

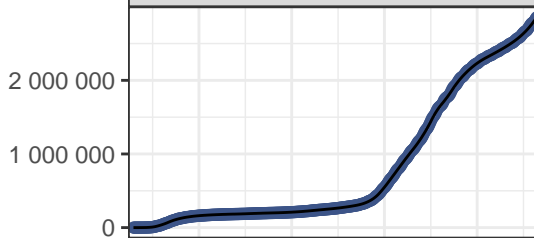

Recovered

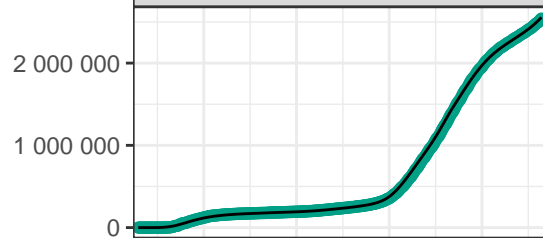

Inpatients

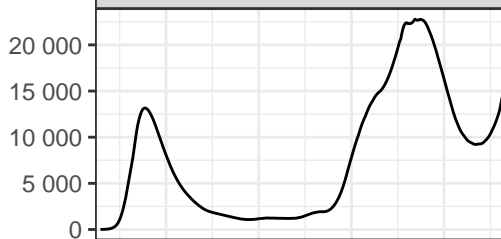

Daily inpatients

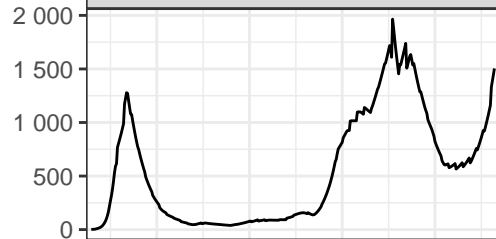

ICU patients

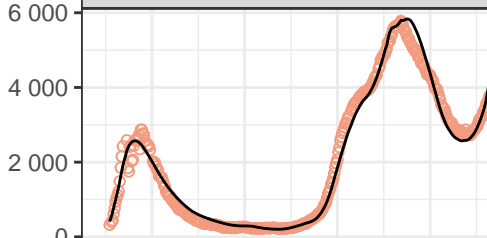

Ventilated patients

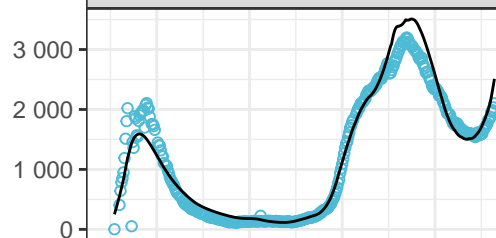

Daily fatalities

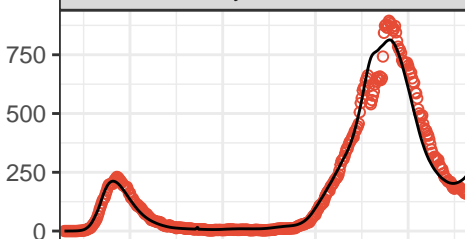

Cumulative fatalities

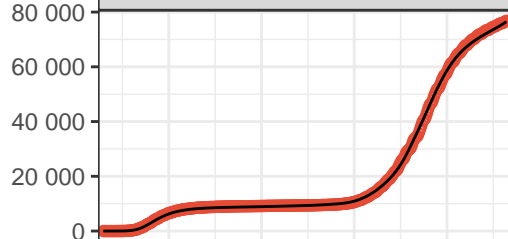

Supplement: s1 [file s1]
