# Supplementary material for: Model-Based Analysis of SARS-CoV-2 Infections, Hospitalization and Outcome in Germany, the Federal States and Districts
Source: MDPI journal article supplement (doi:10.3390/v14102114), 2022-09-24

## LK Ahrweiler

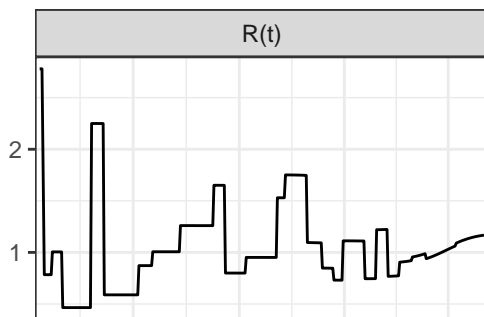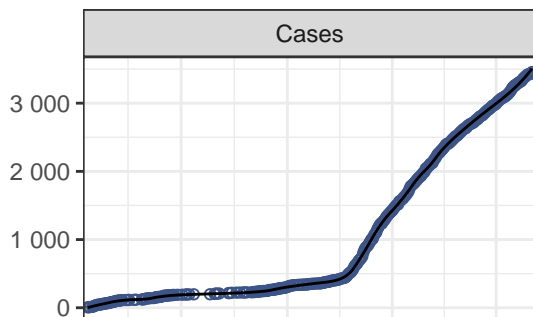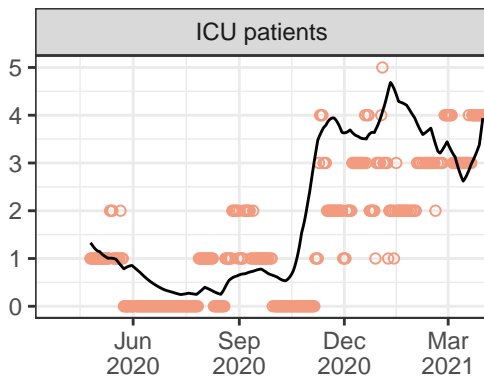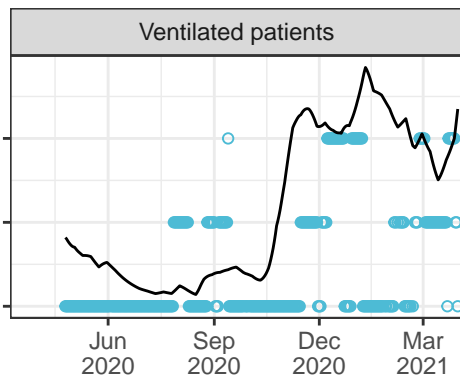

## LK Aichach–Friedberg

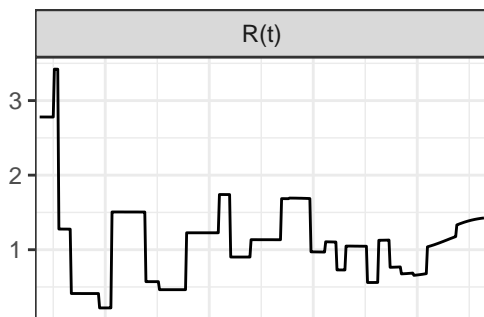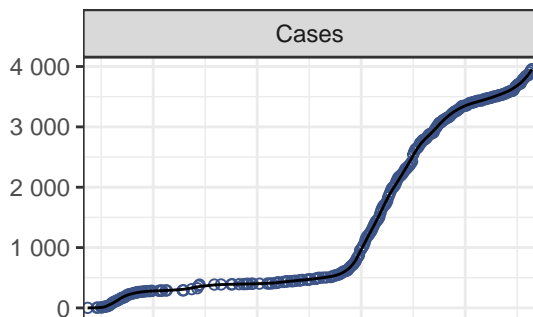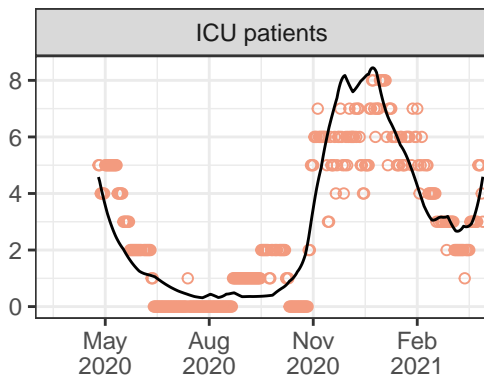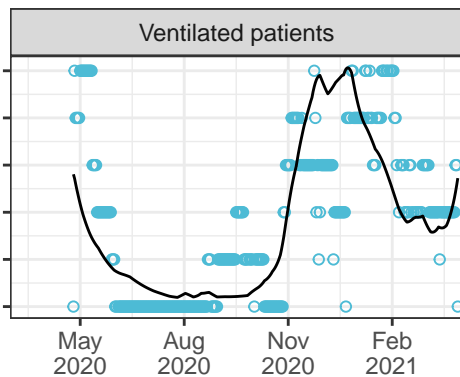

## LK Alb-Donau-Kreis

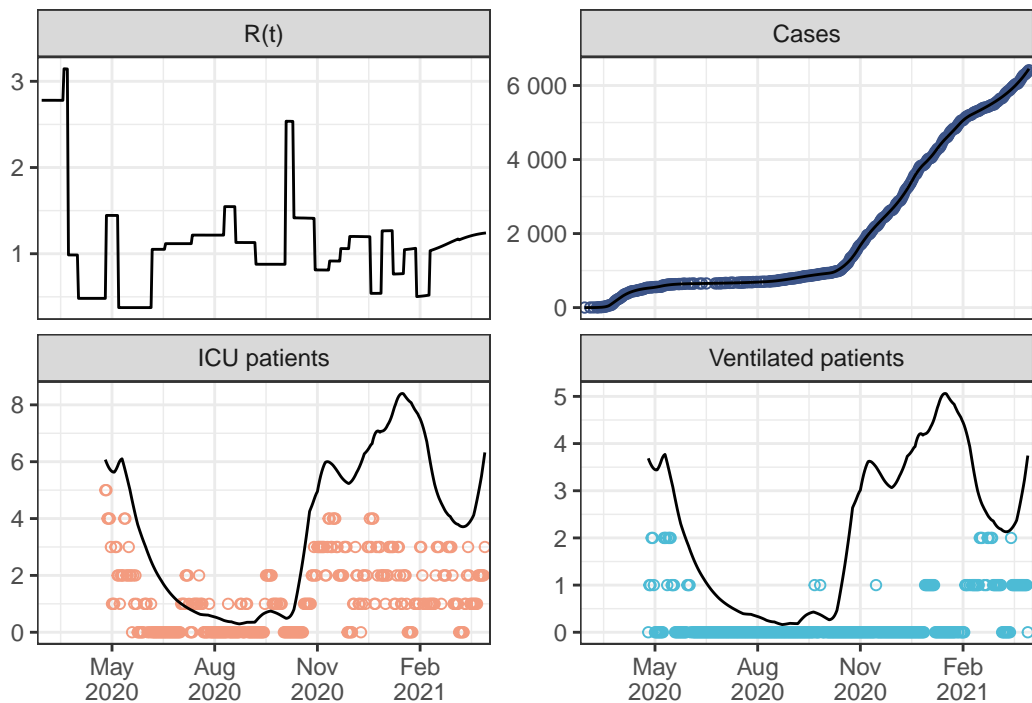

## LK Altenburger Land

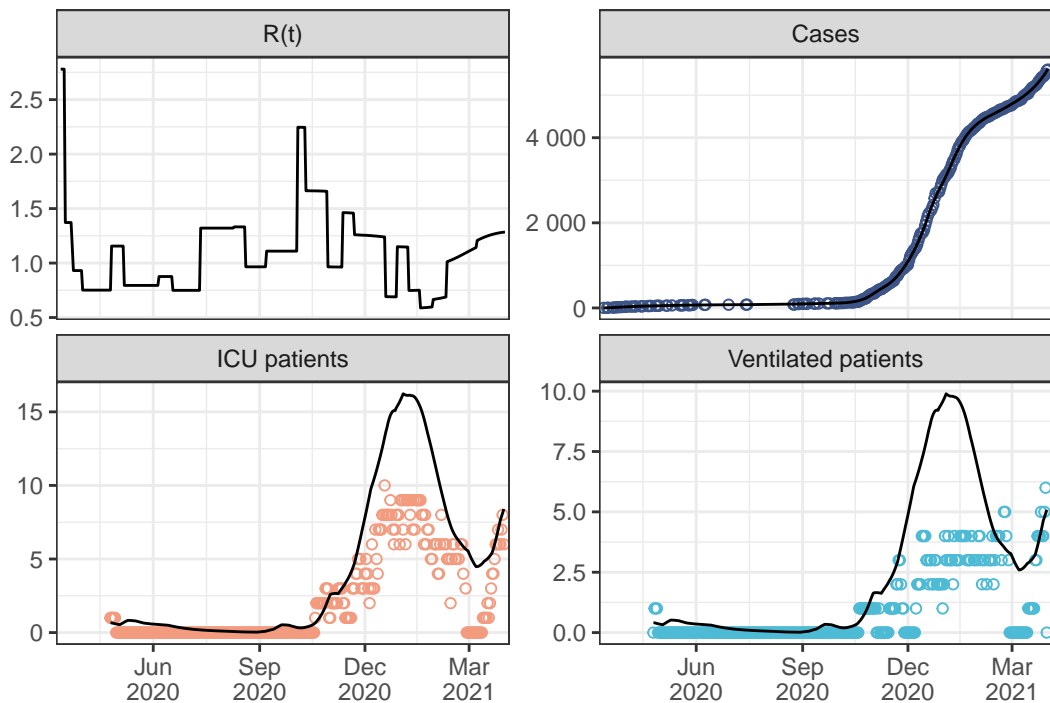

## LK Altenkirchen

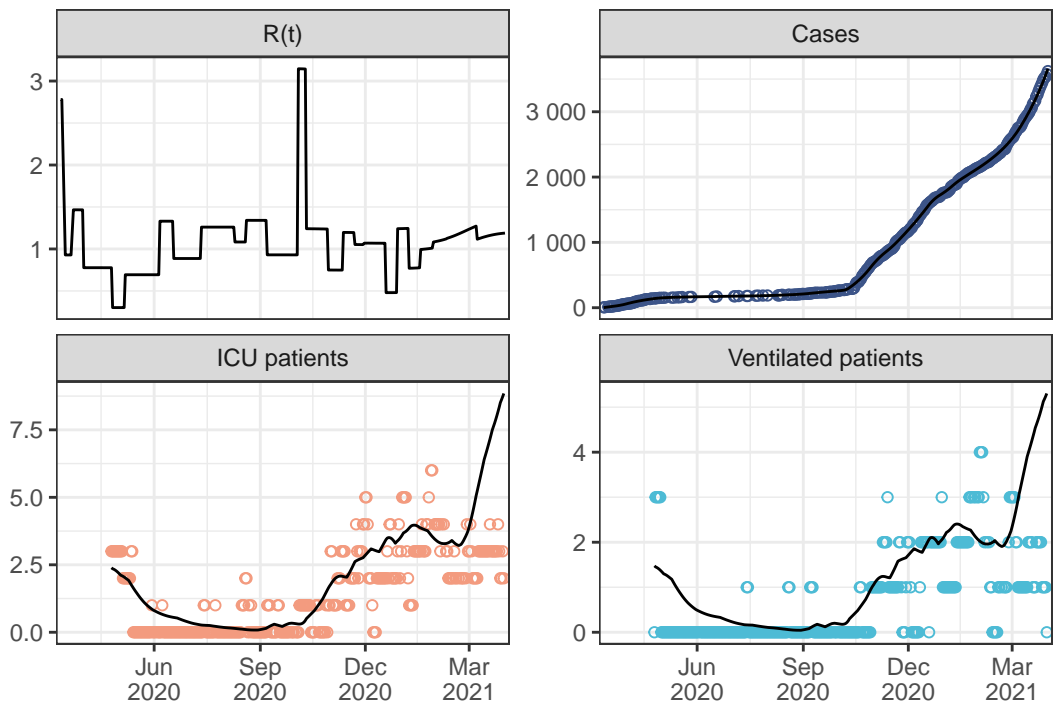

## LK Altmarkkreis Salzwedel

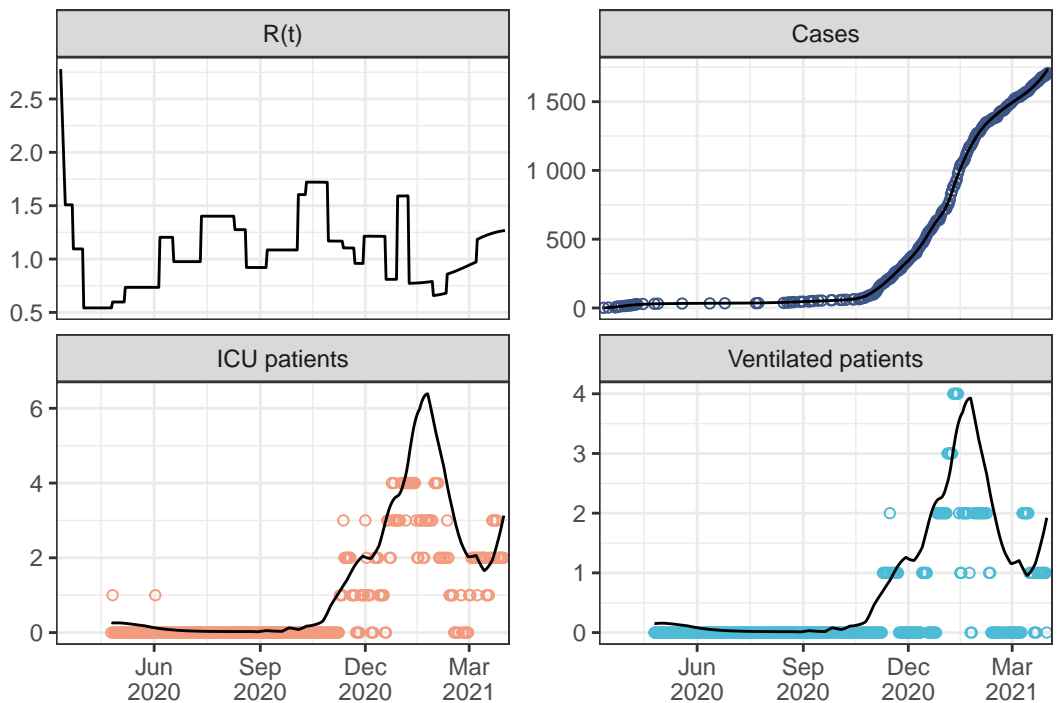

## LK Altötting

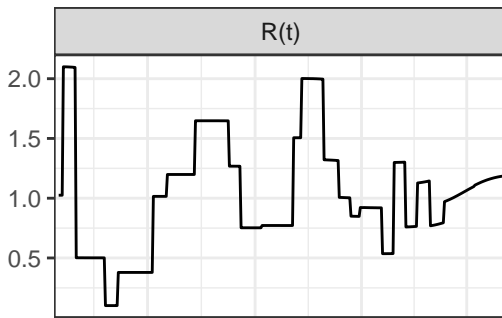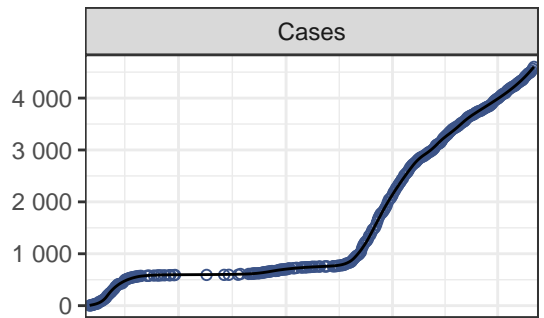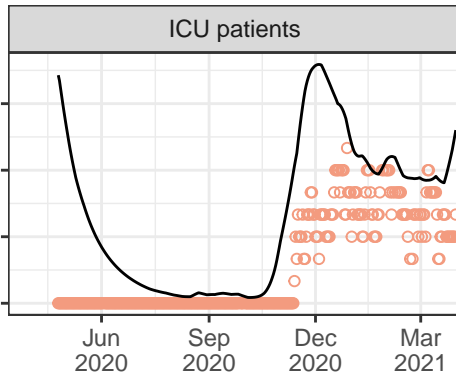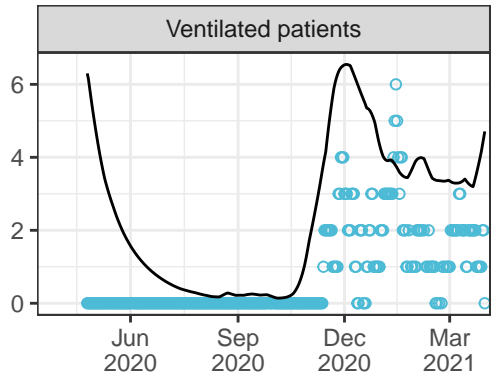

## LK Alzey-Worms

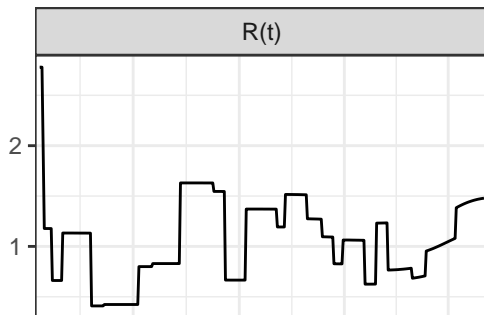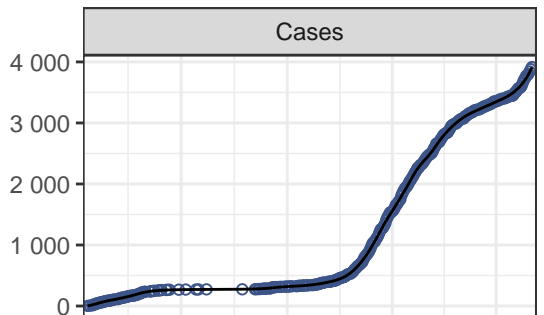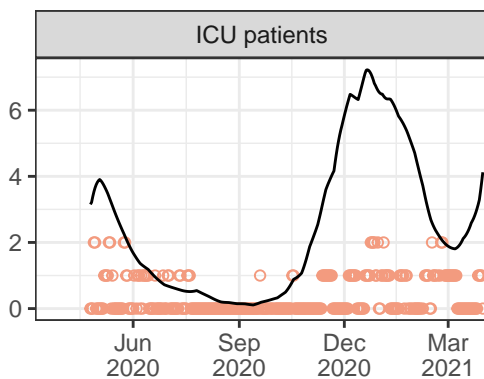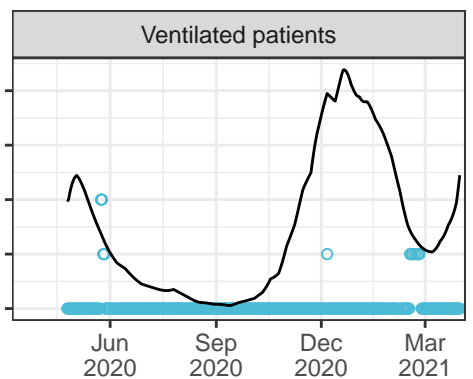

## LK Amberg–Sulzbach

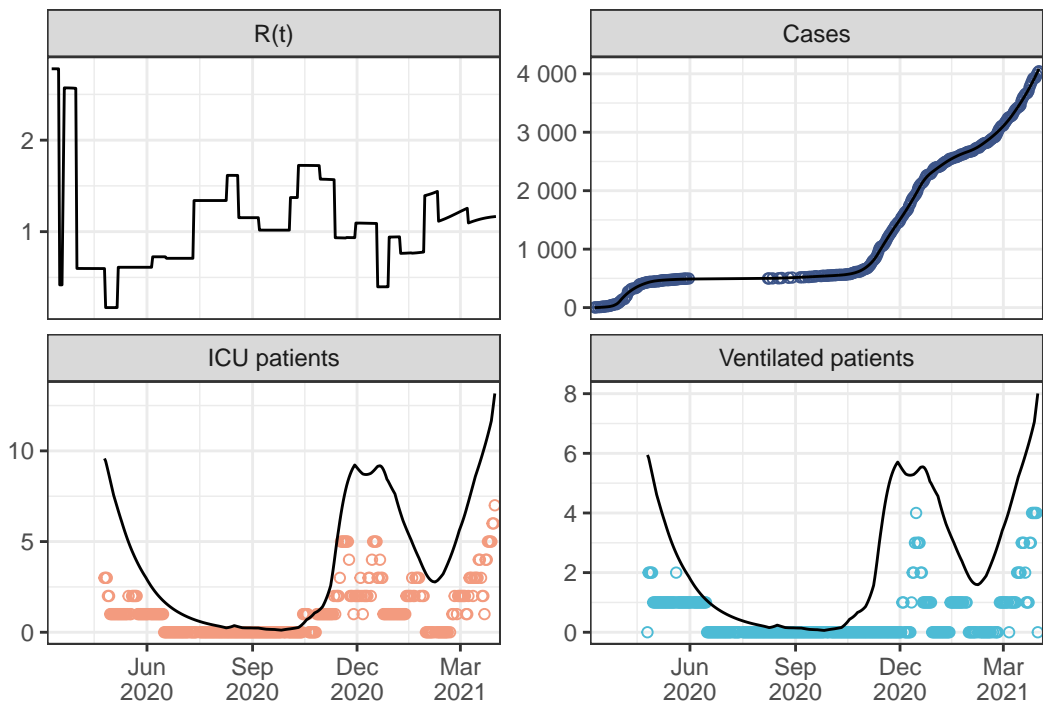

## LK Ammerland

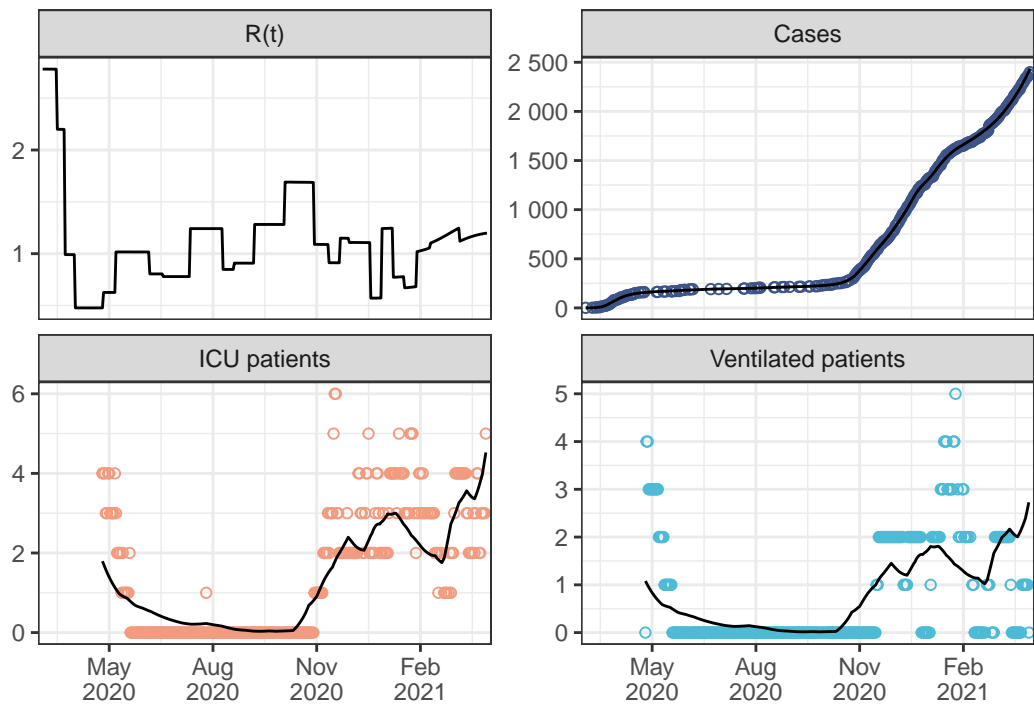

## LK Anhalt–Bitterfeld

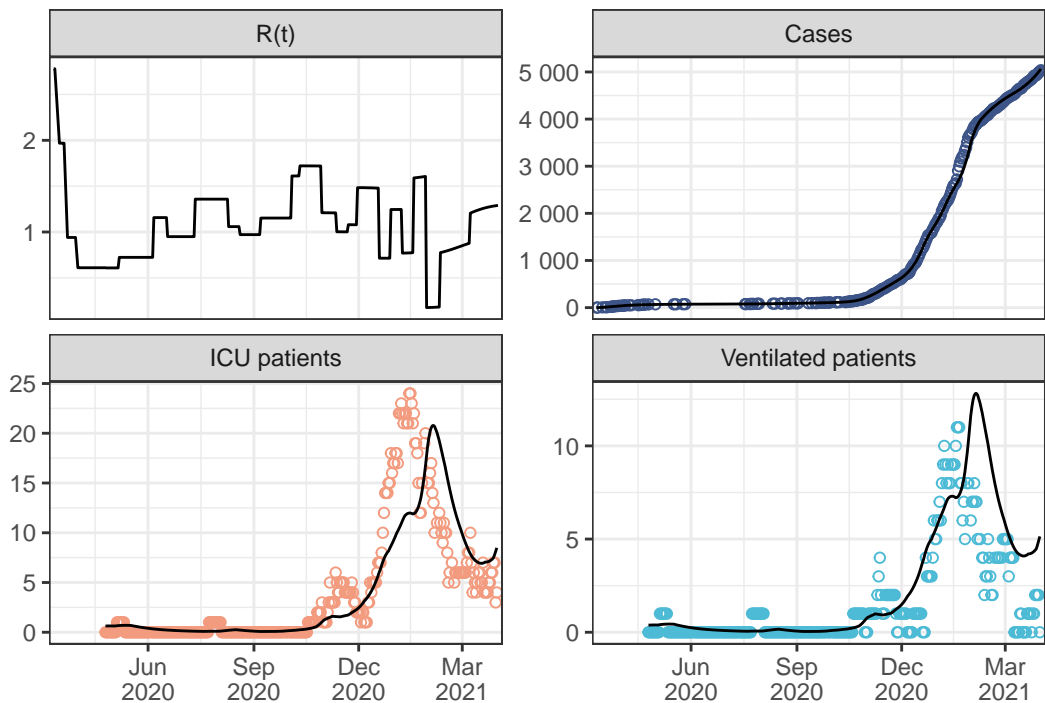

## LK Ansbach

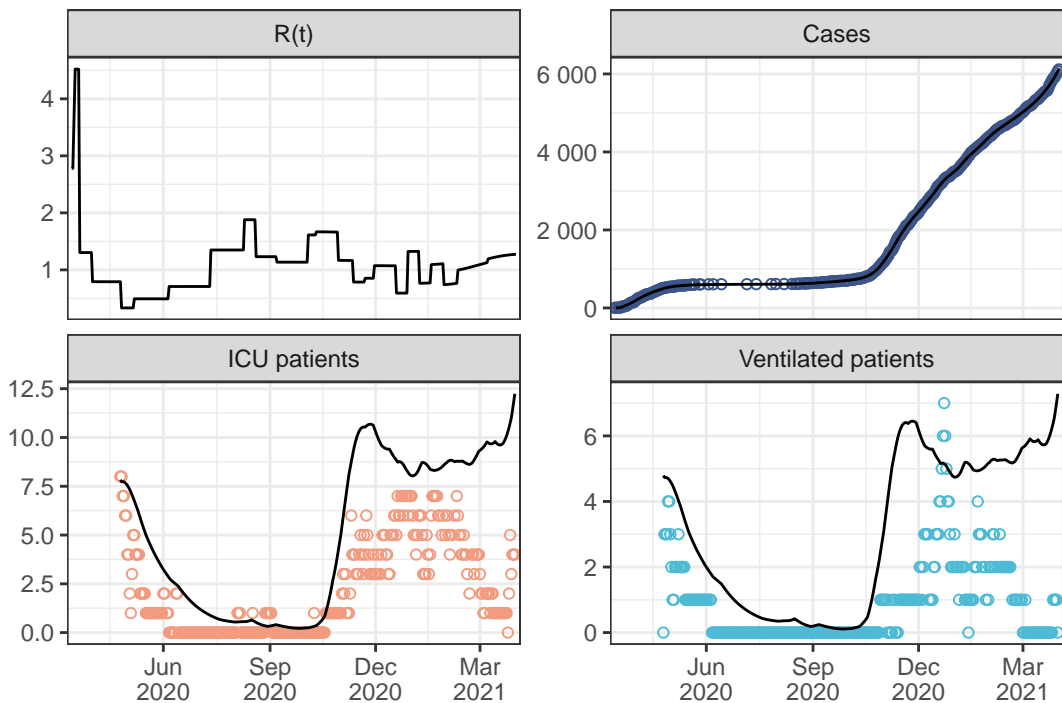

## LK Aschaffenburg

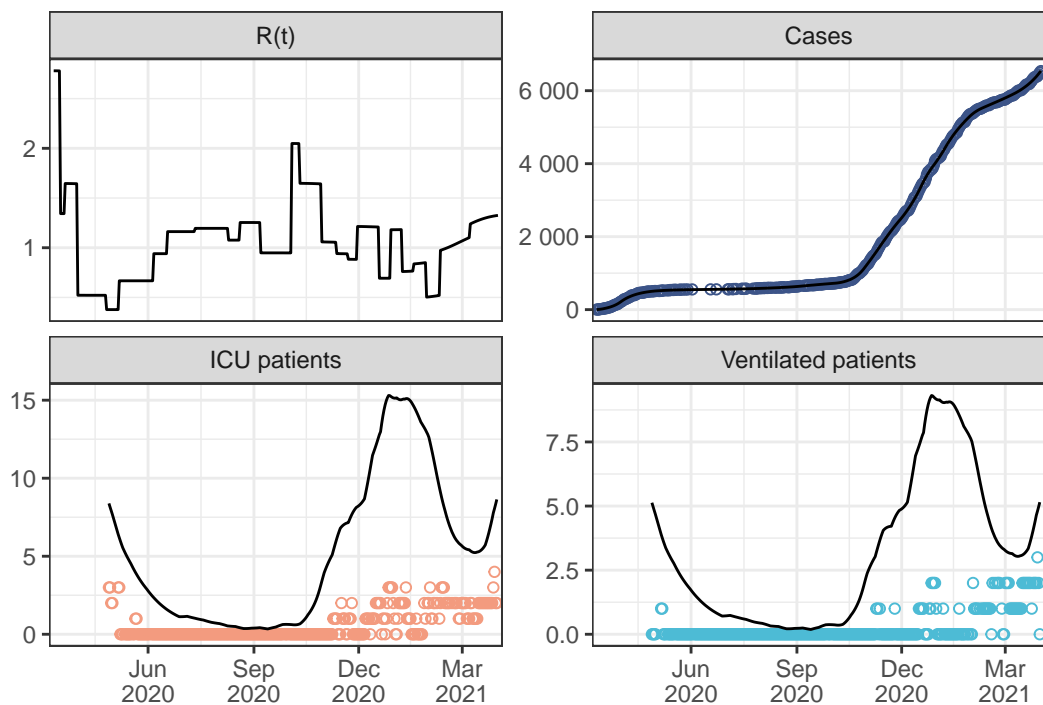

## LK Augsburg

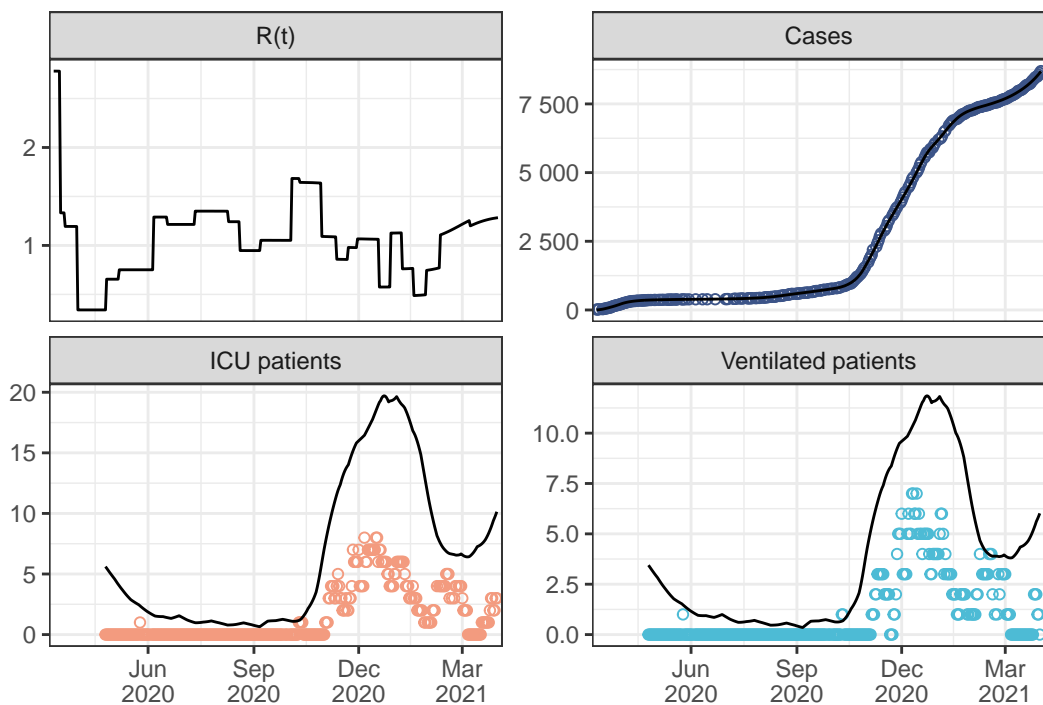

## LK Aurich

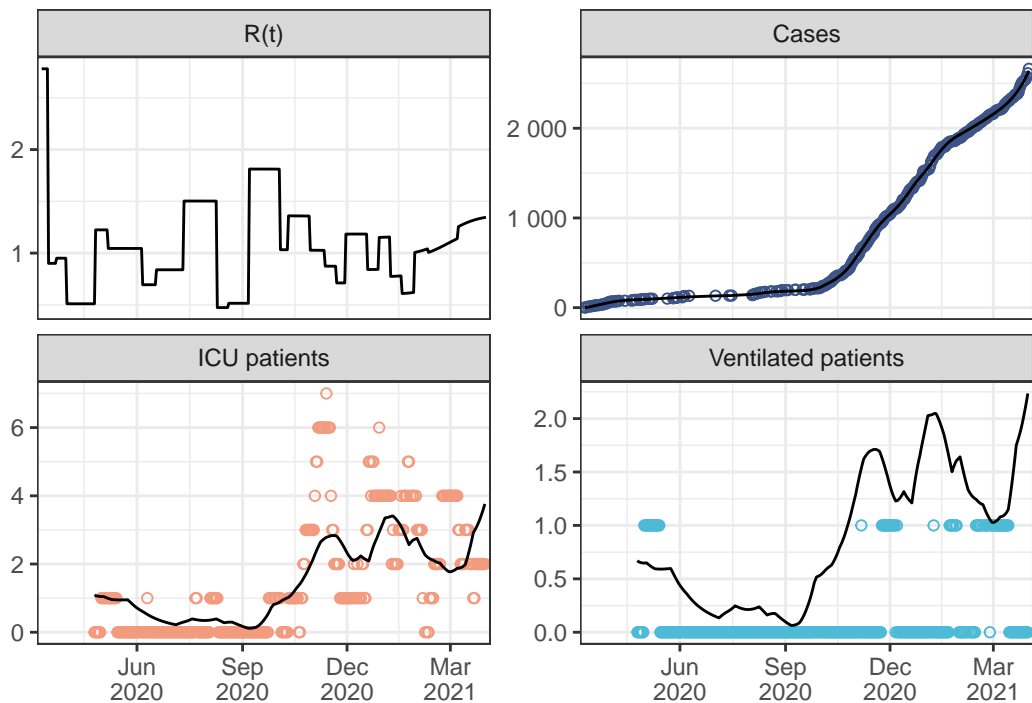

## LK Bad Dürkheim

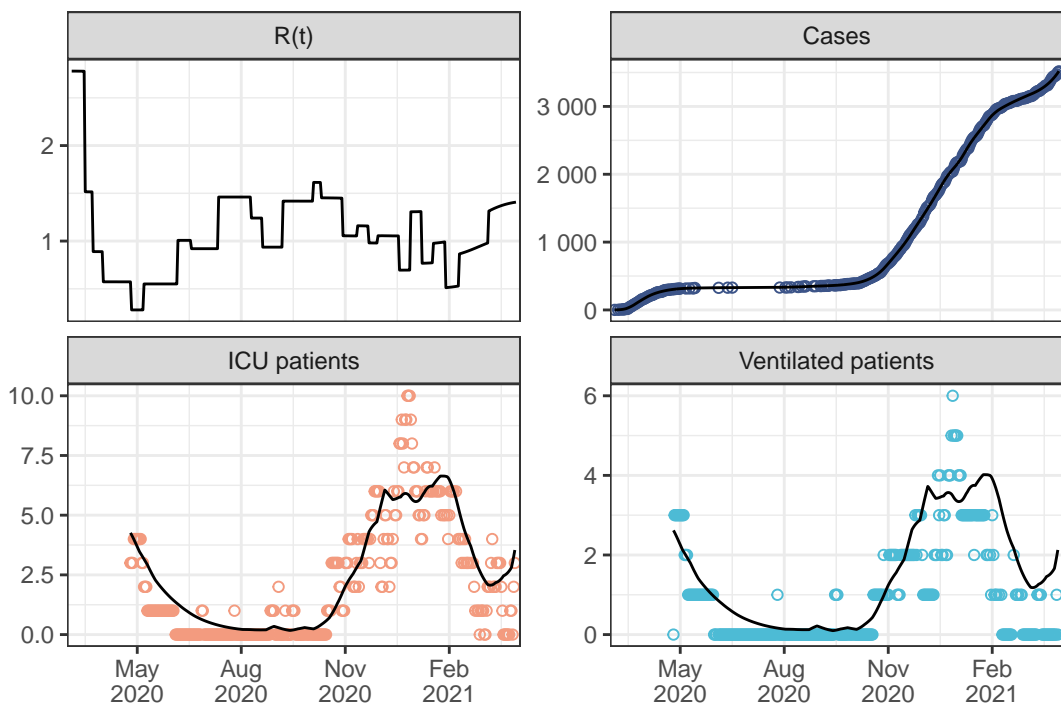

## LK Bad Kissingen

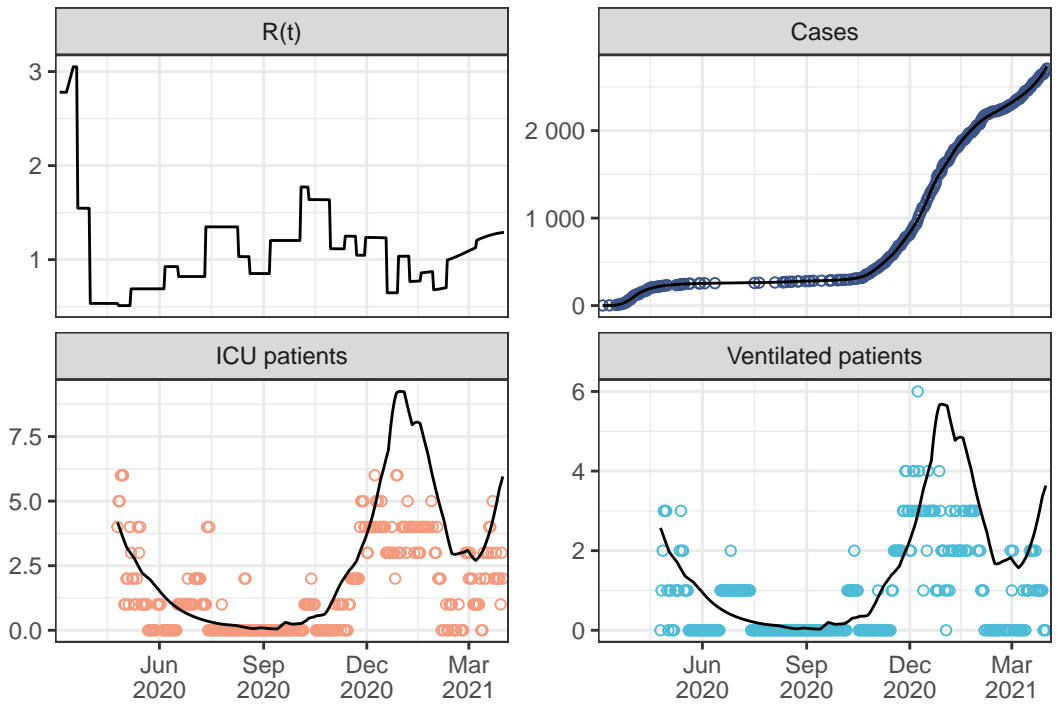

## LK Bad Kreuznach

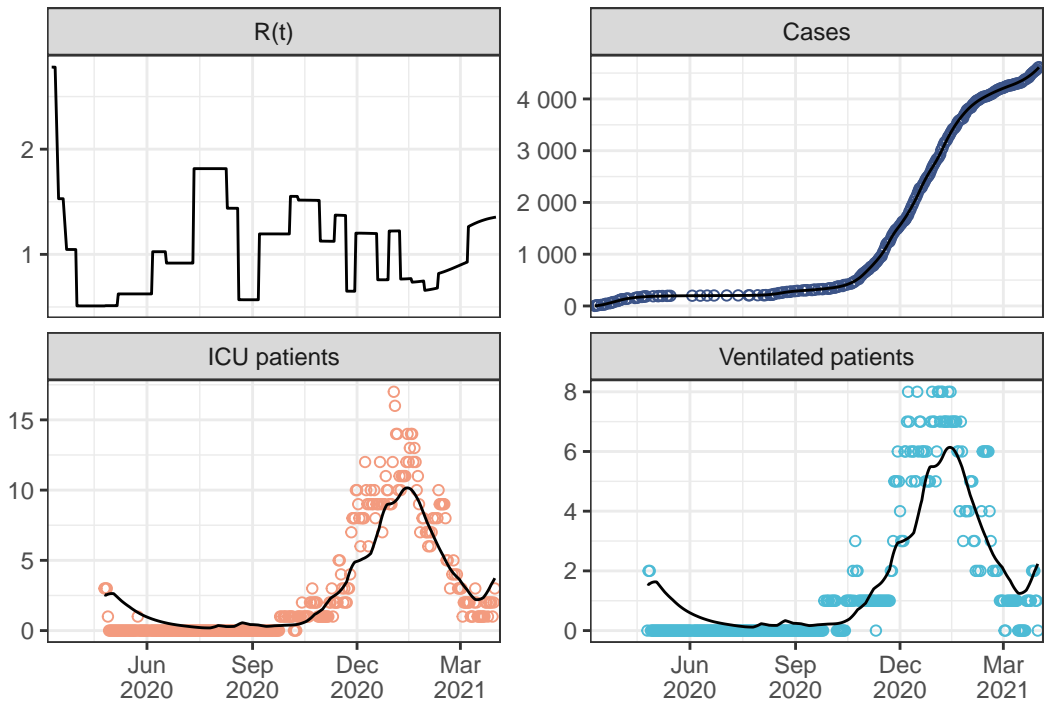

## LK Bad Tölz–Wolfratshausen

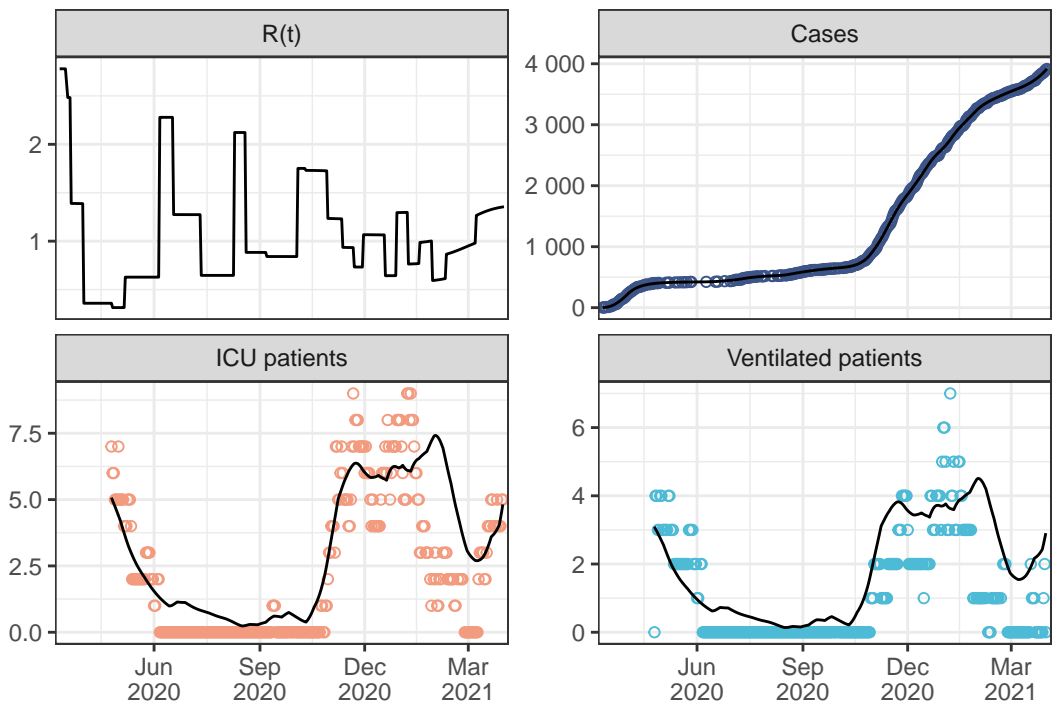

## LK Bamberg

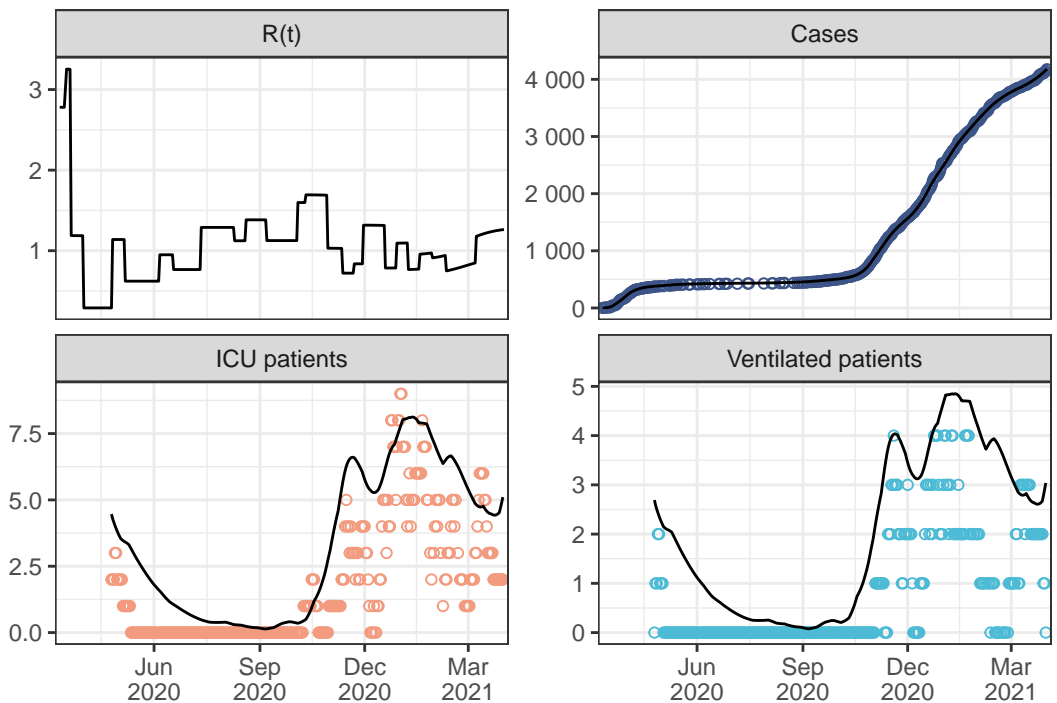

## LK Barnim

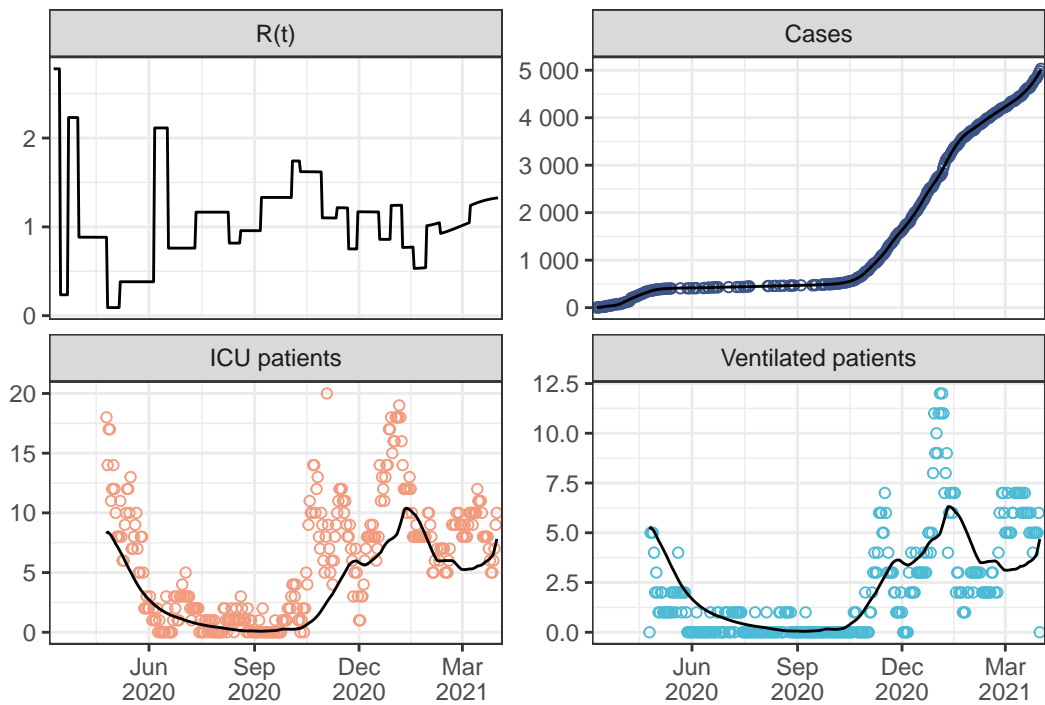

## LK Bautzen

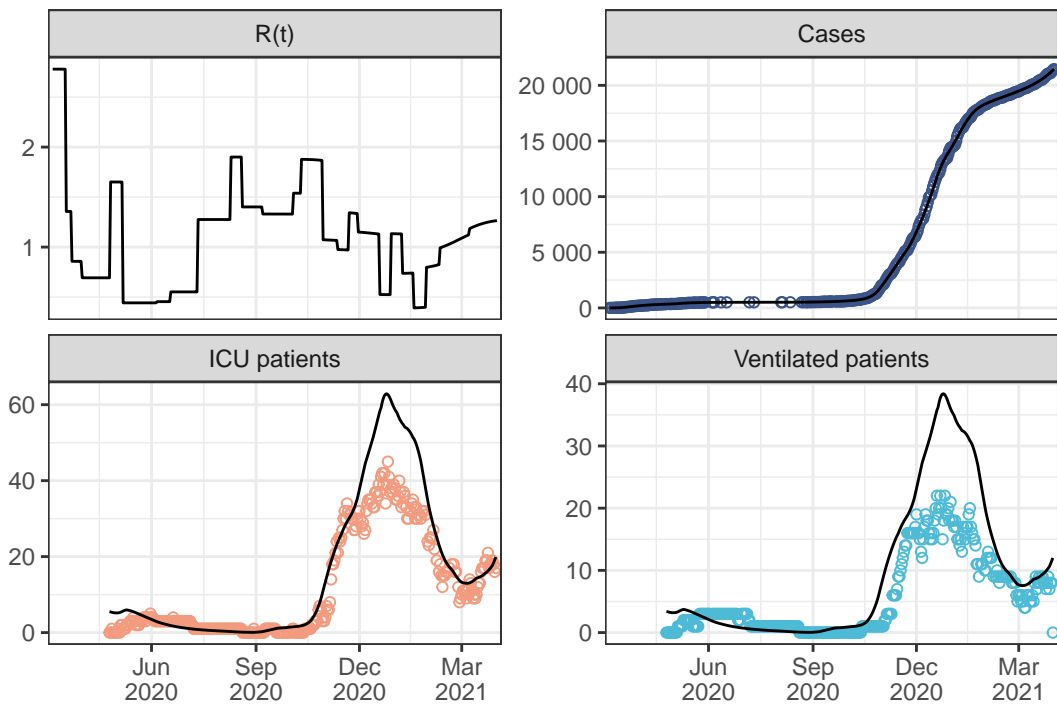

## LK Bayreuth

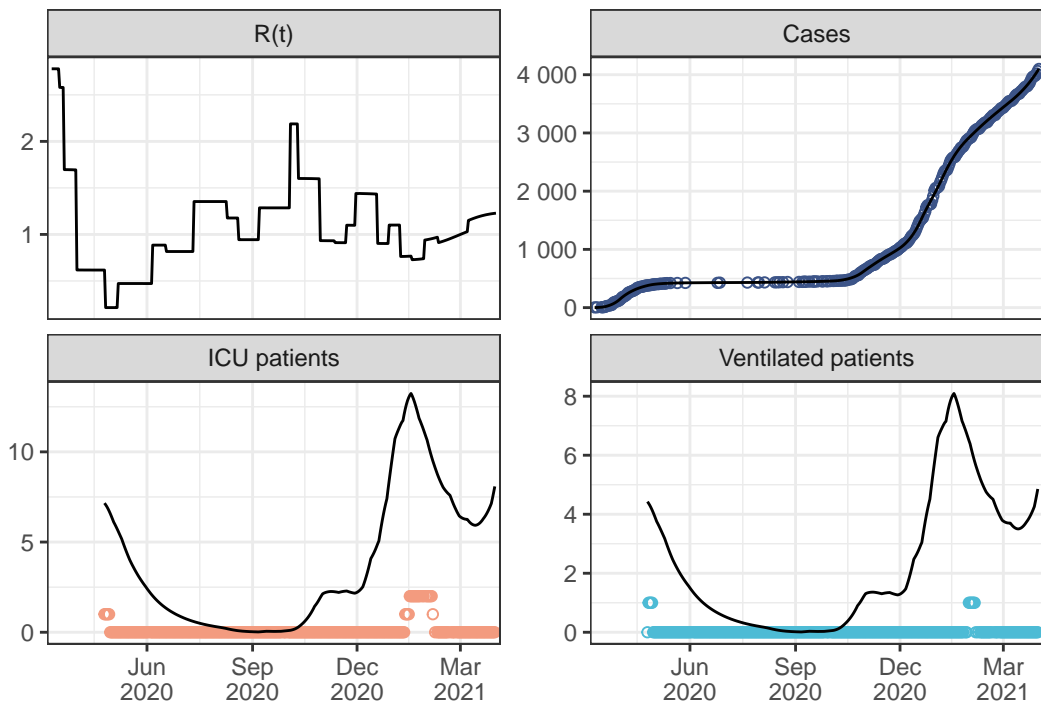

## LK Berchtesgadener Land

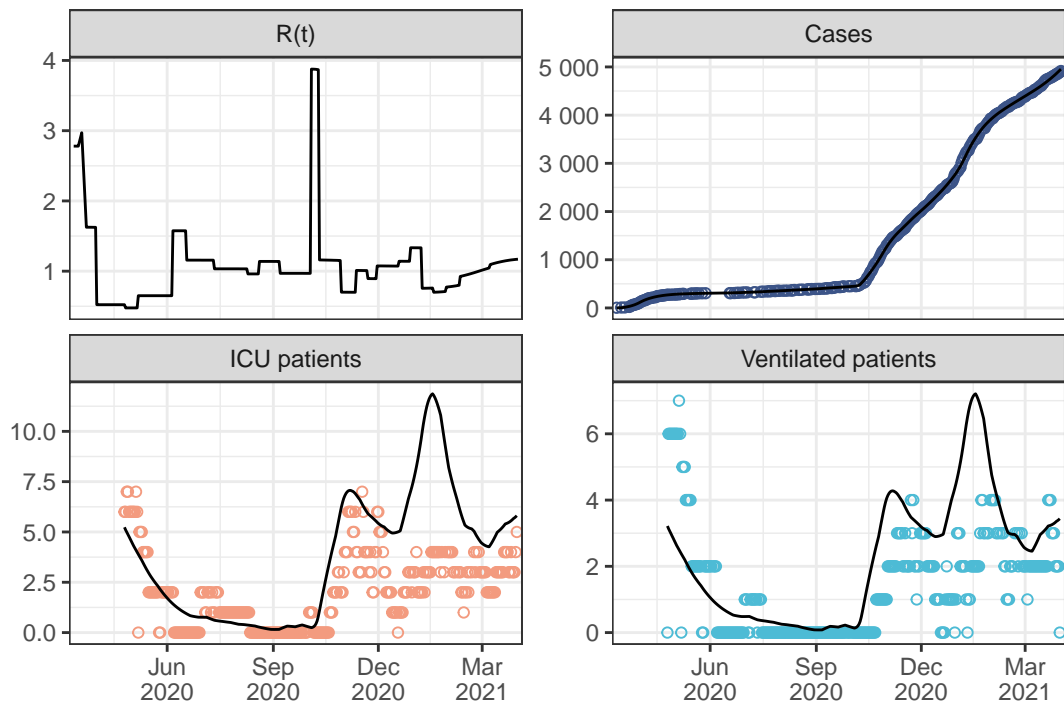

## LK Bergstraße

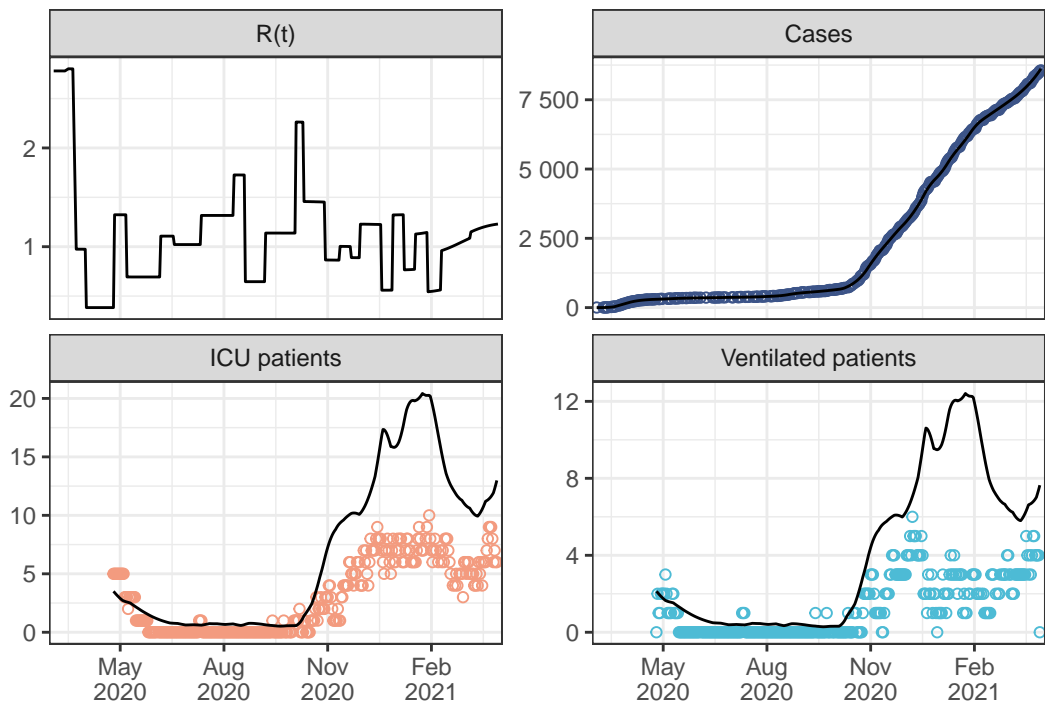

## LK Bernkastel–Wittlich

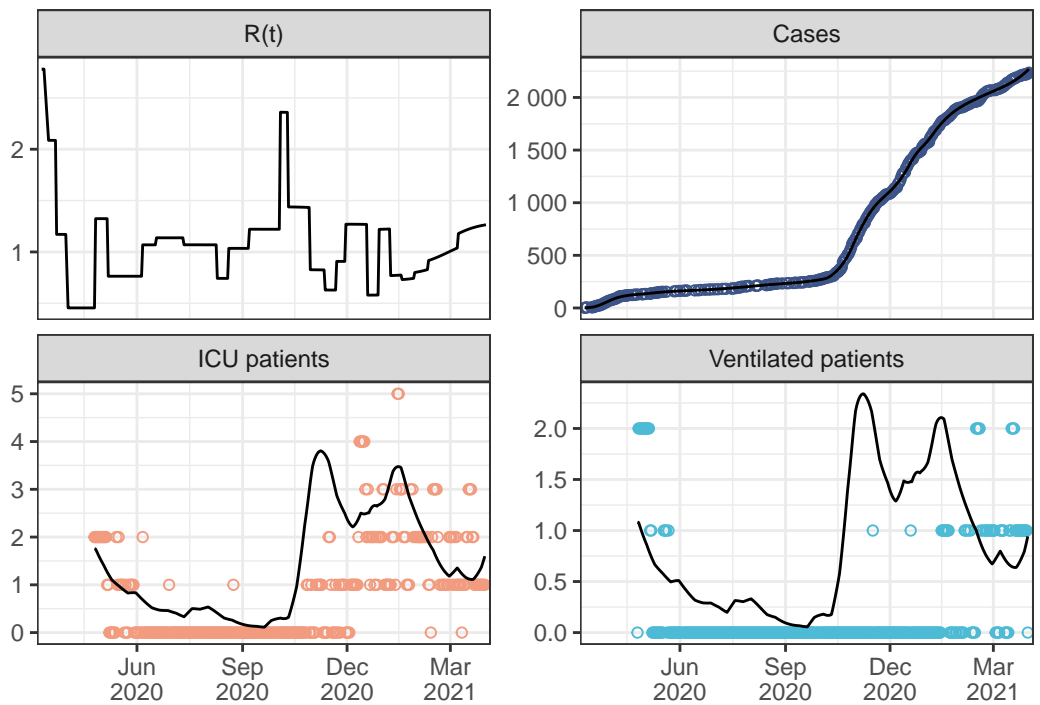

## LK Biberach

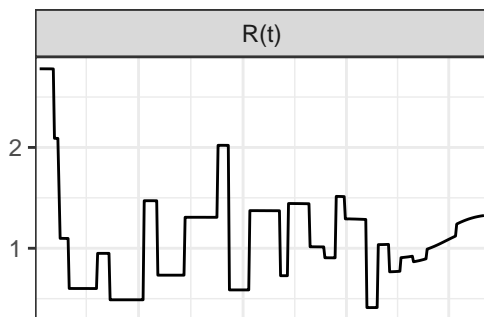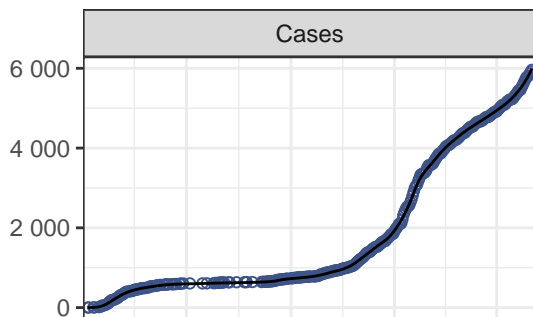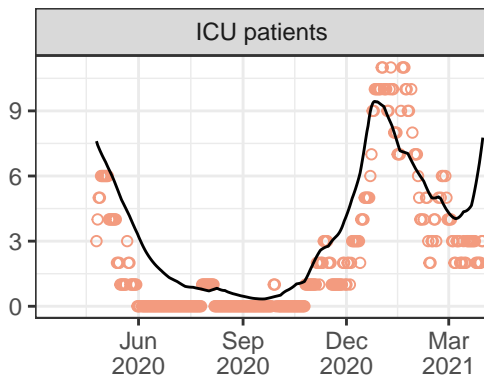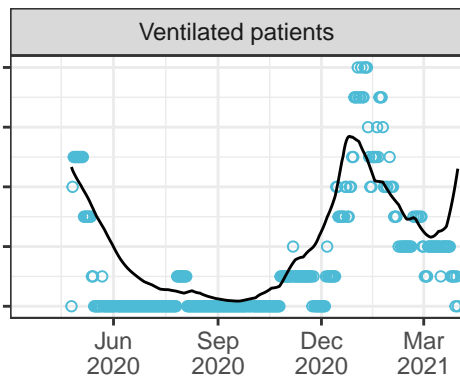

## LK Birkenfeld

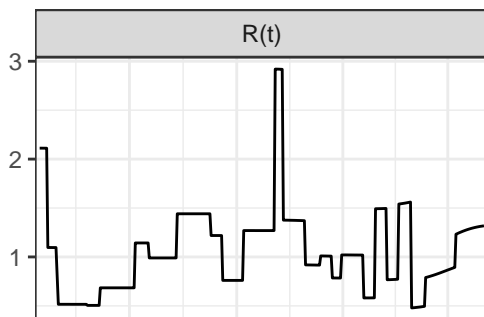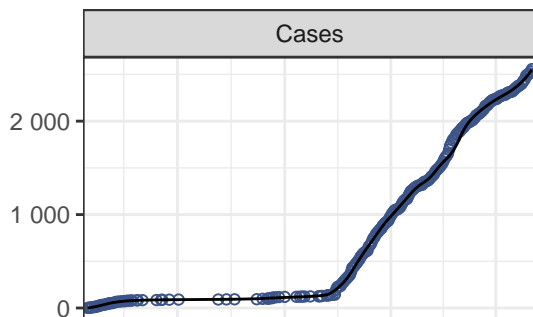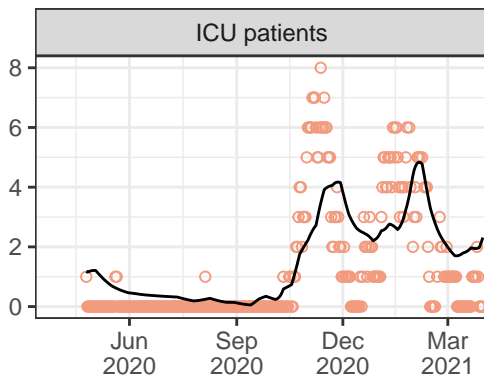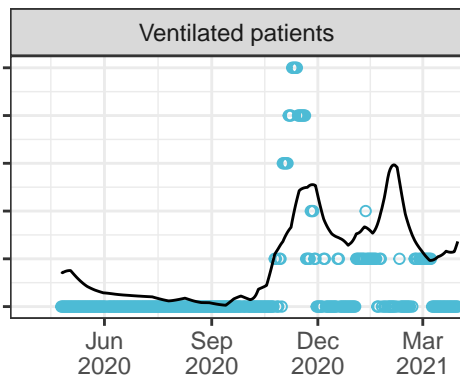

## LK Bitburg-Prüm

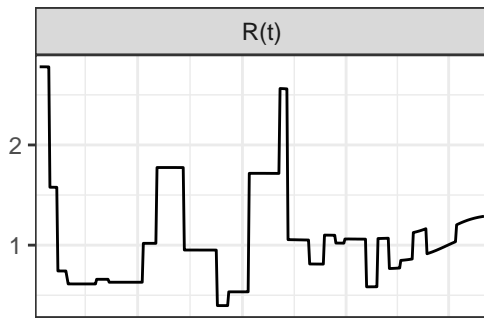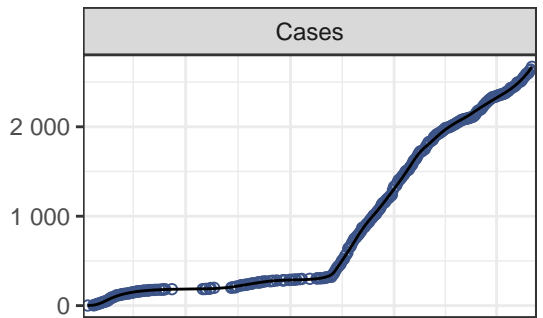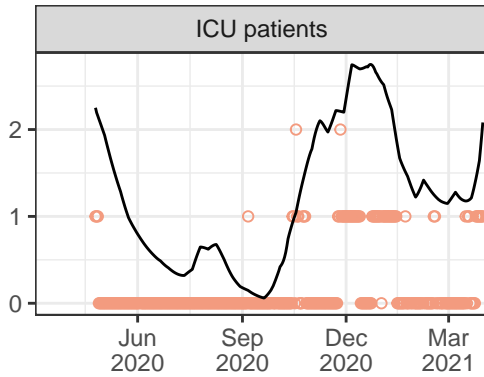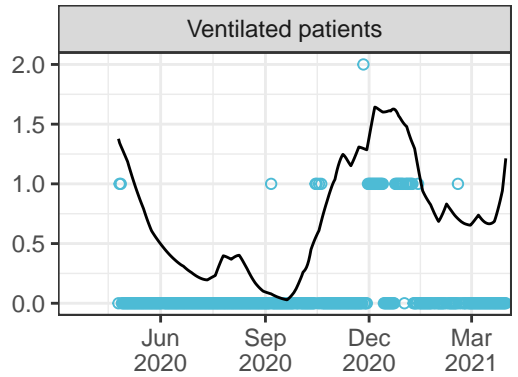

## LK Böblingen

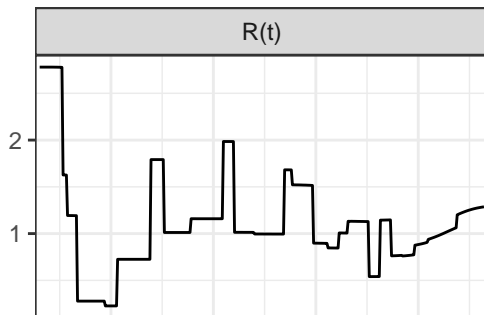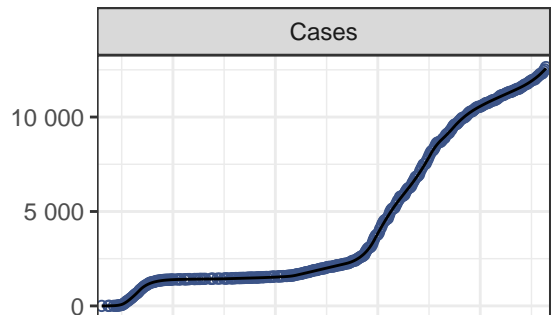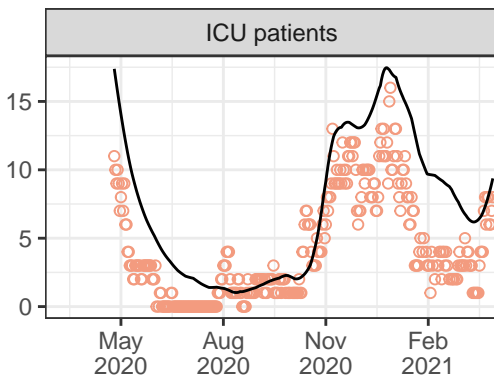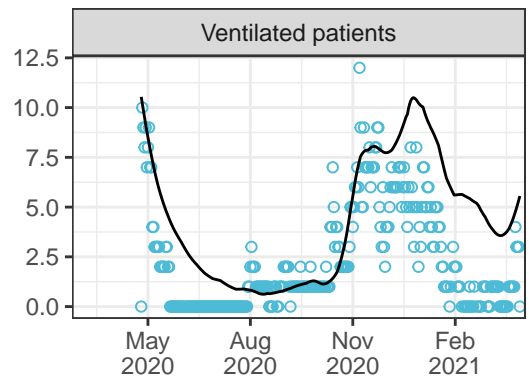

## LK Bodenseekreis

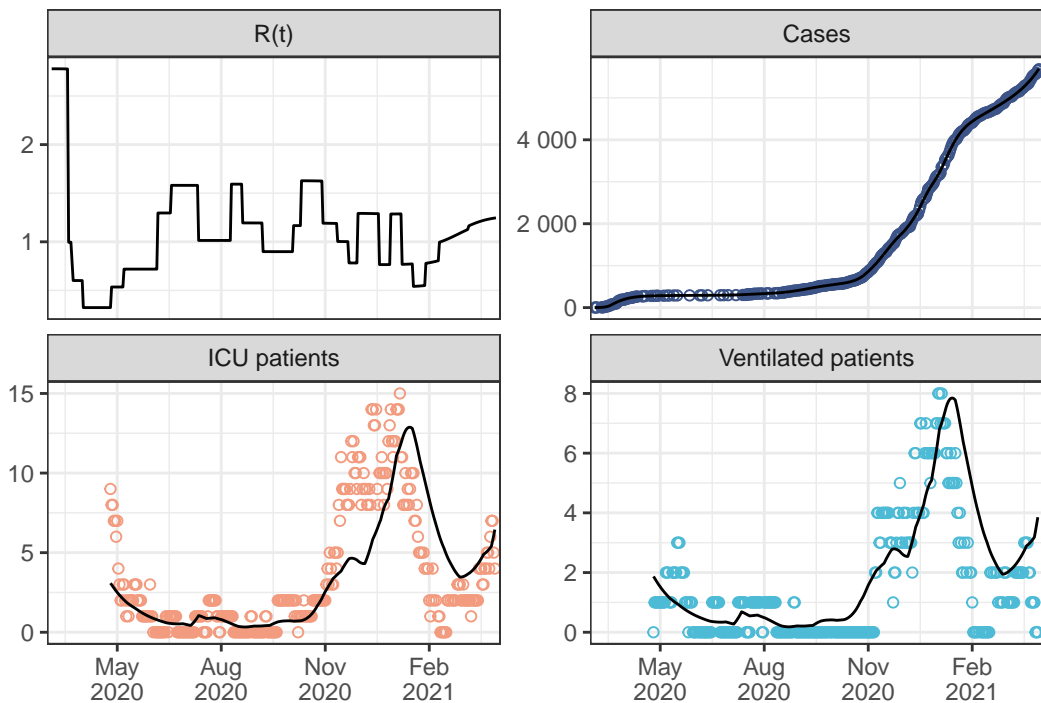

## LK Börde

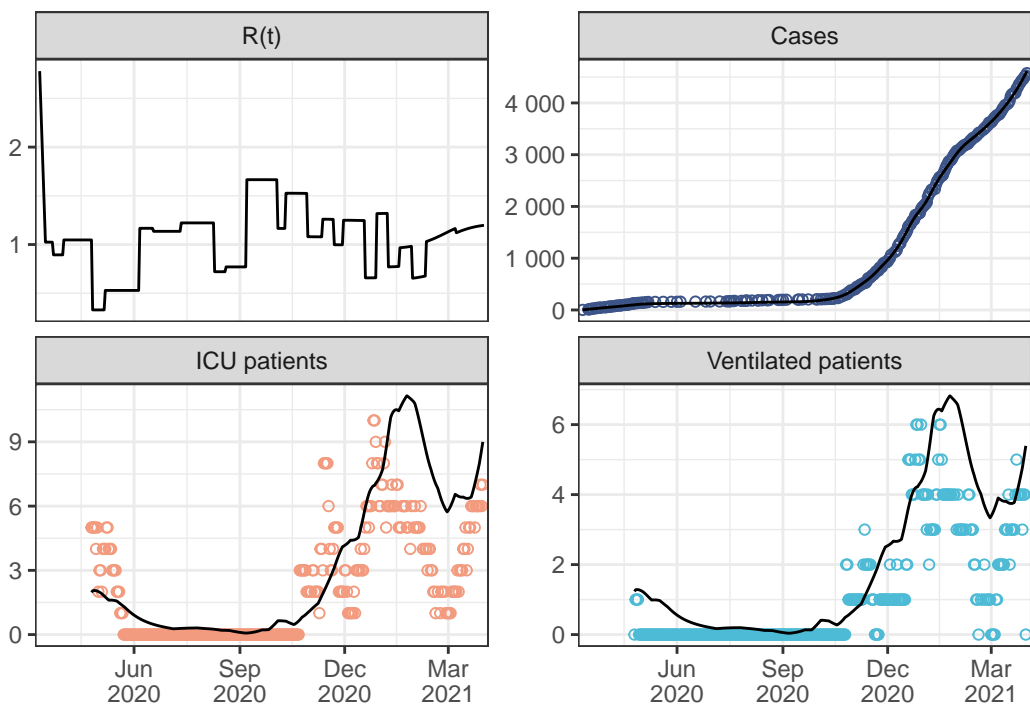

## LK Borken

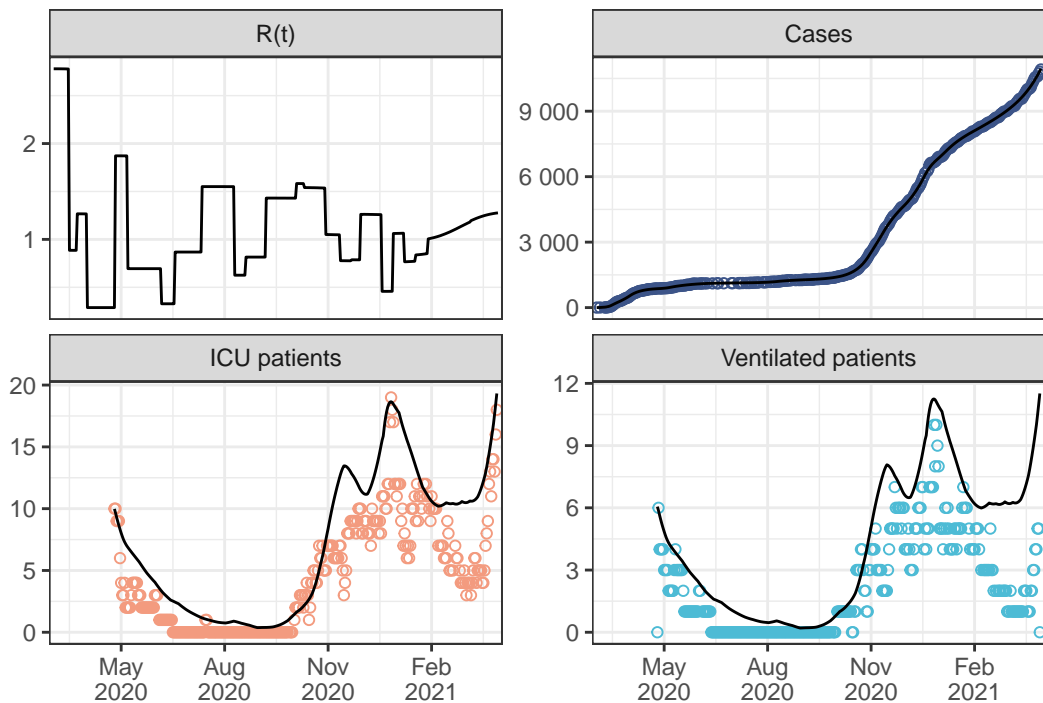

## LK Breisgau-Hochschwarzwald

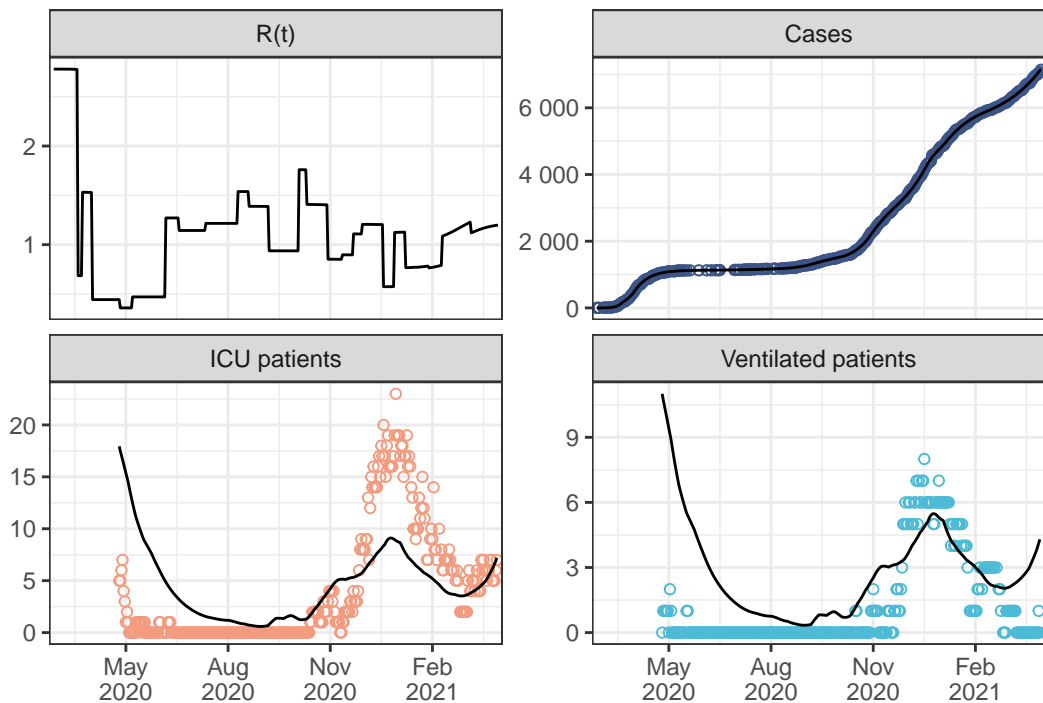

## LK Burgenlandkreis

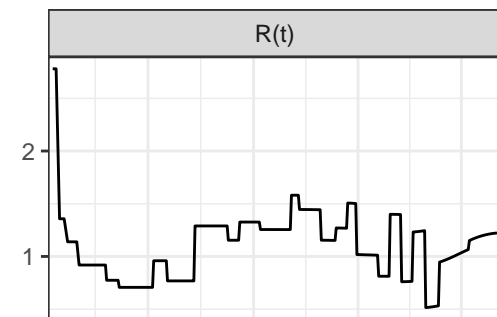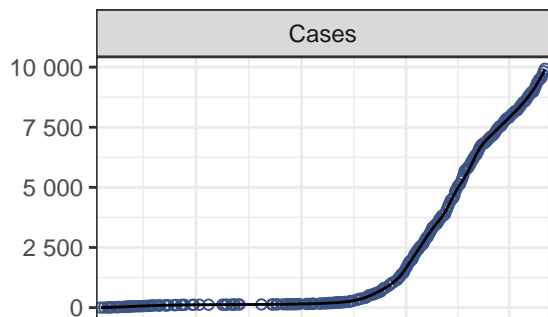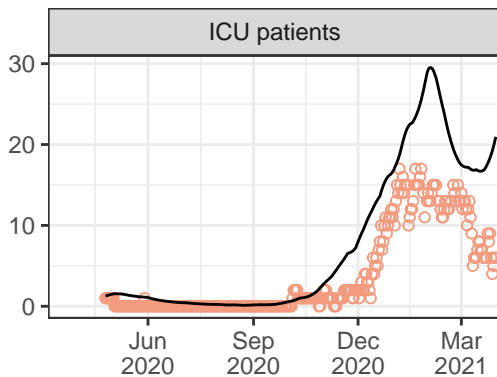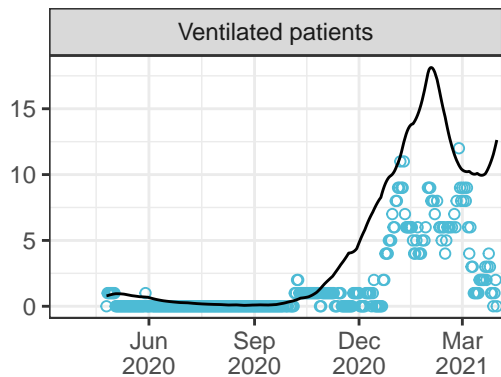

## LK Calw

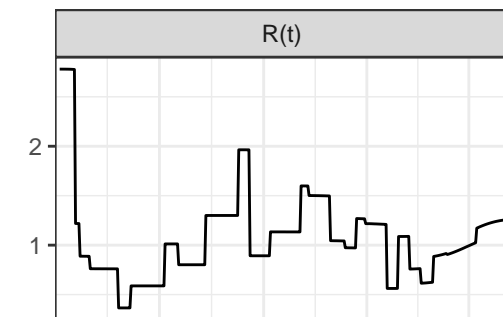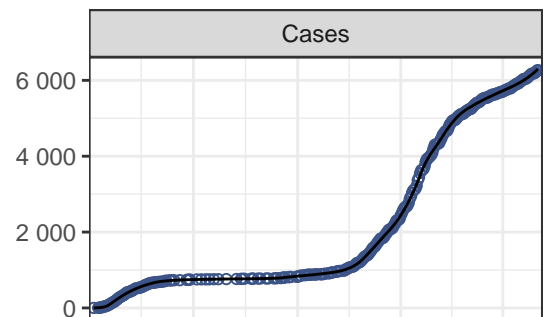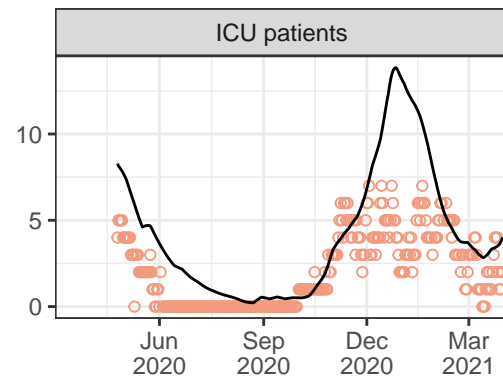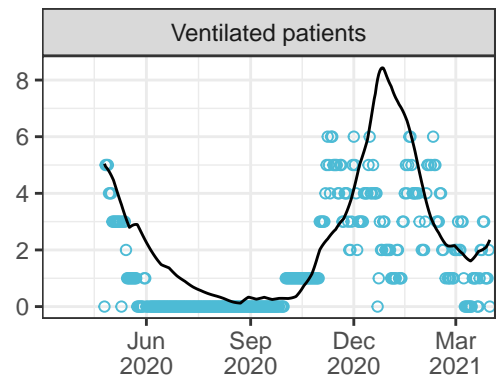

## LK Celle

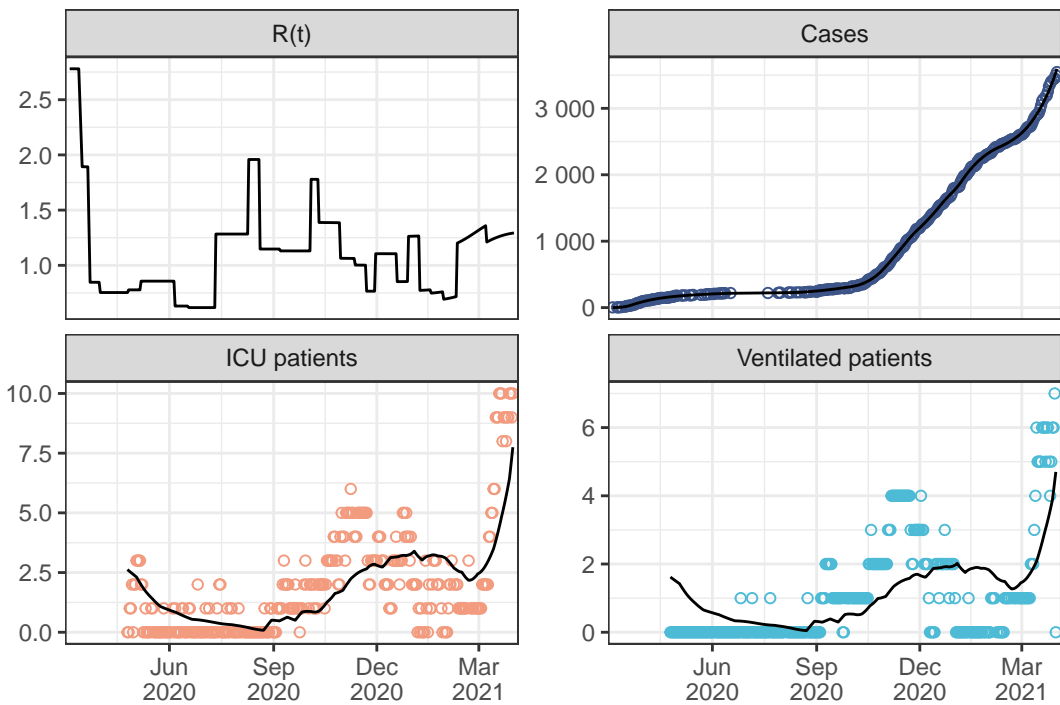

## LK Cham

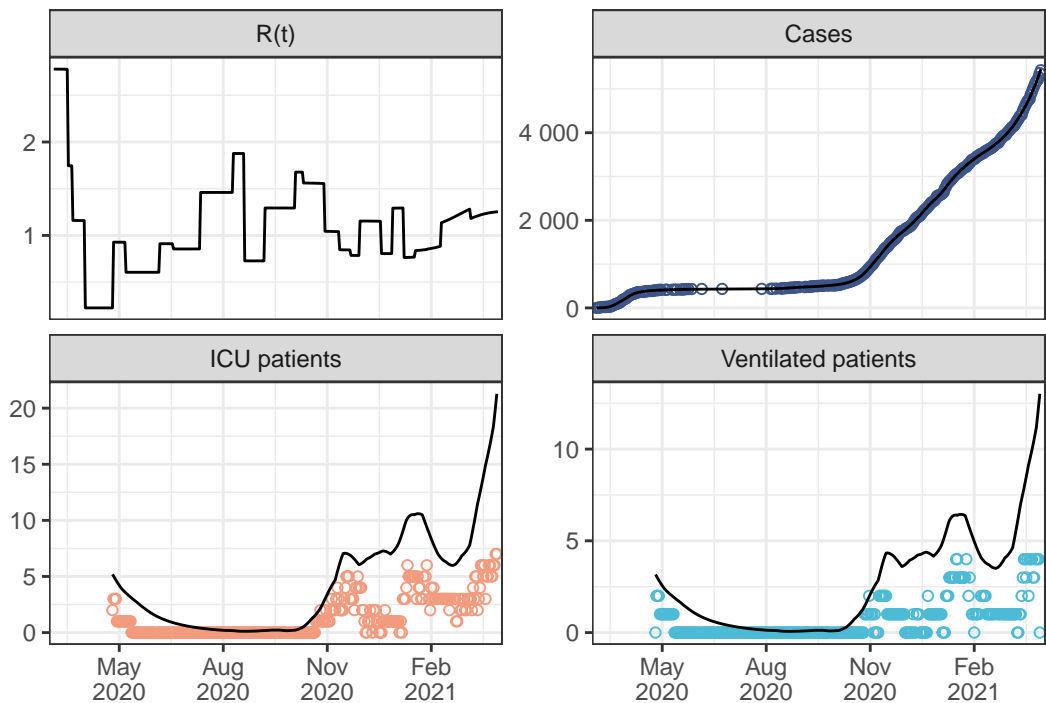

## LK Cloppenburg

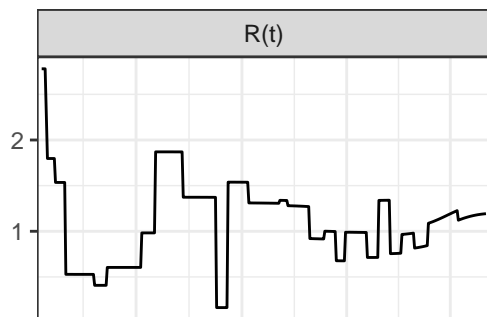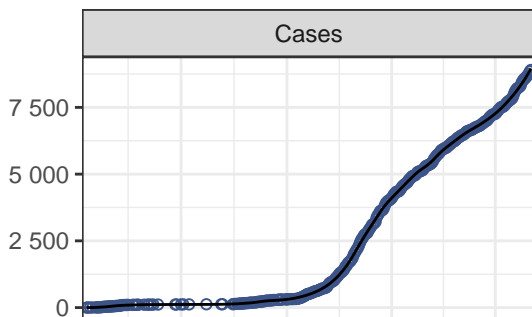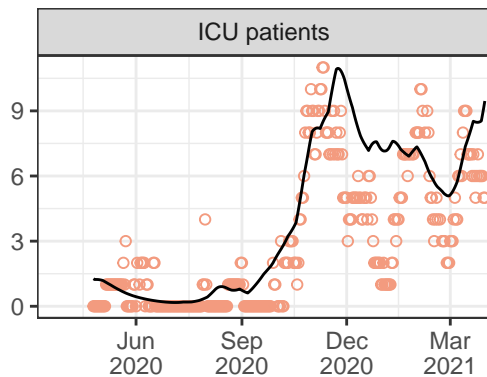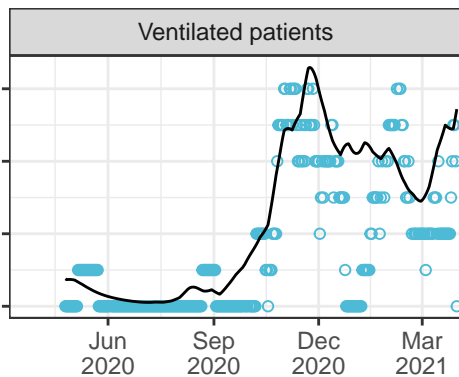

## LK Coburg

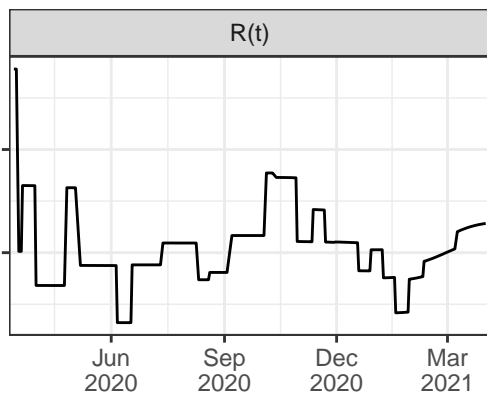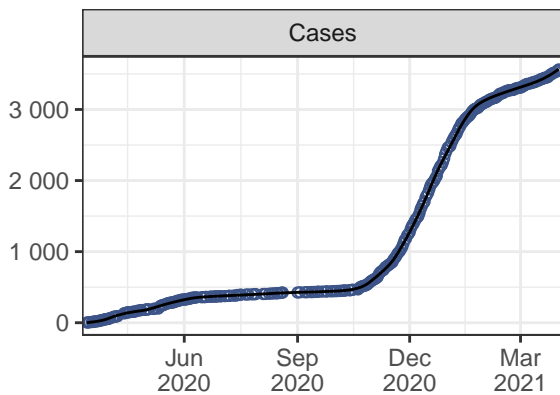

## LK Cochem-Zell

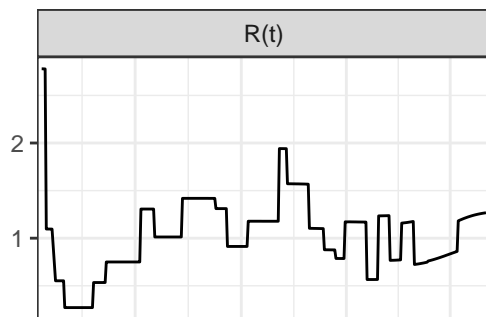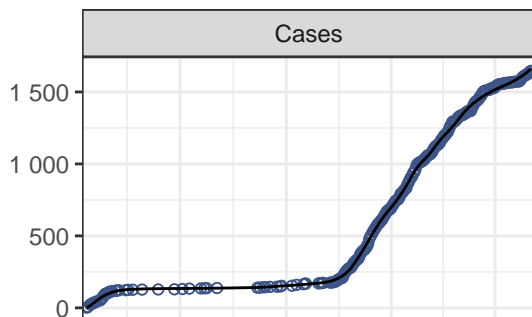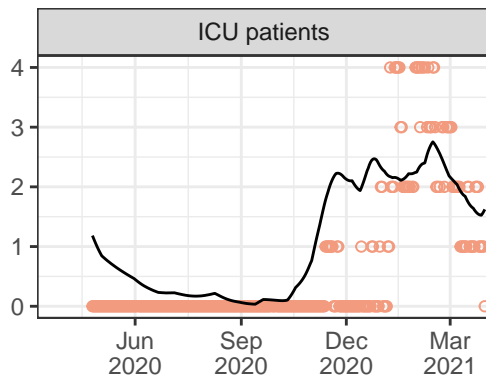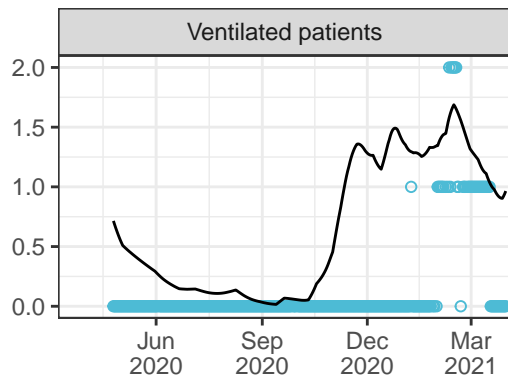

## LK Coesfeld

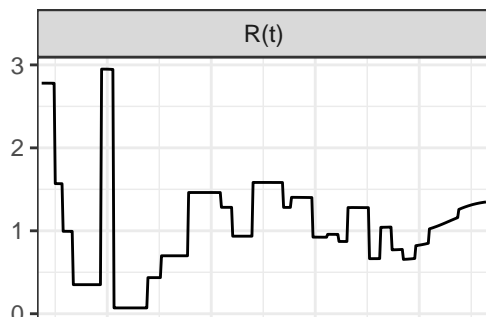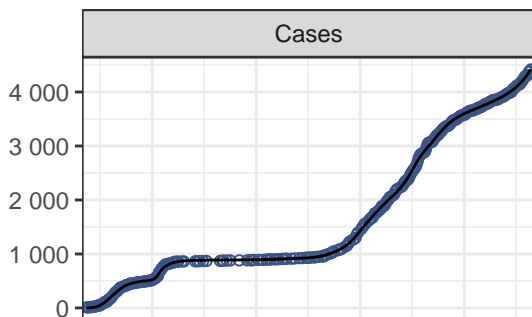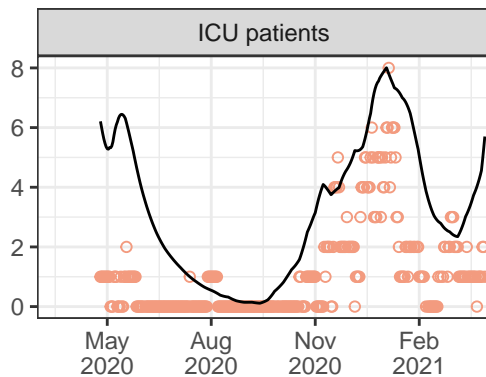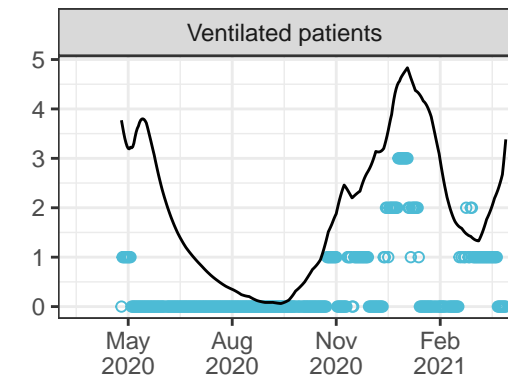

## LK Cuxhaven

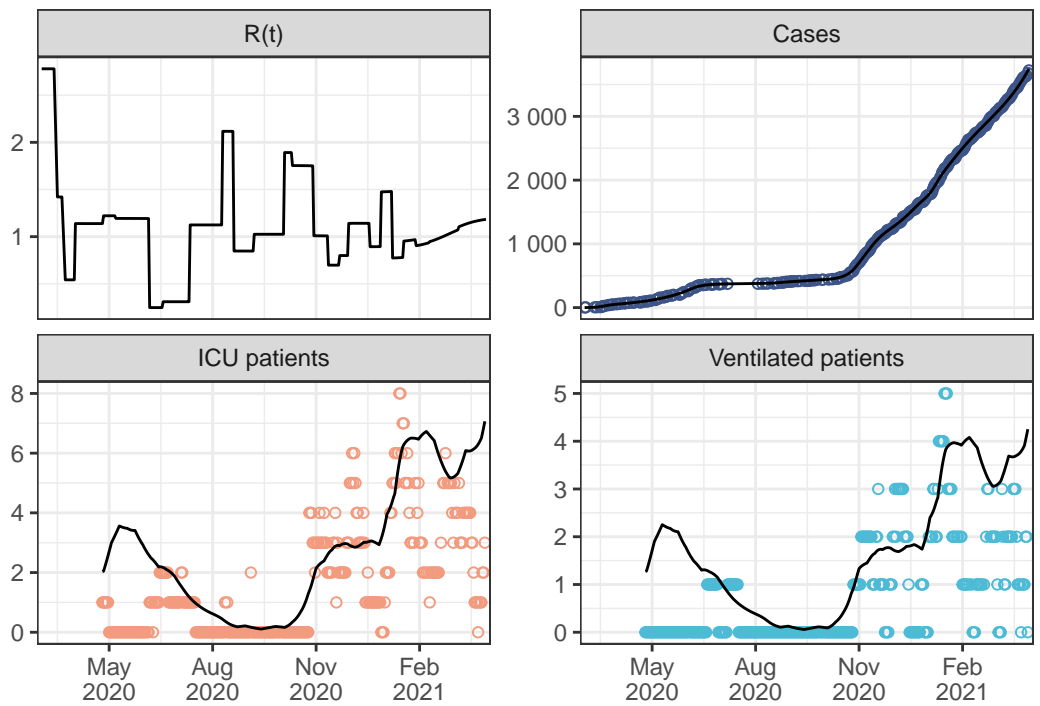

## LK Dachau

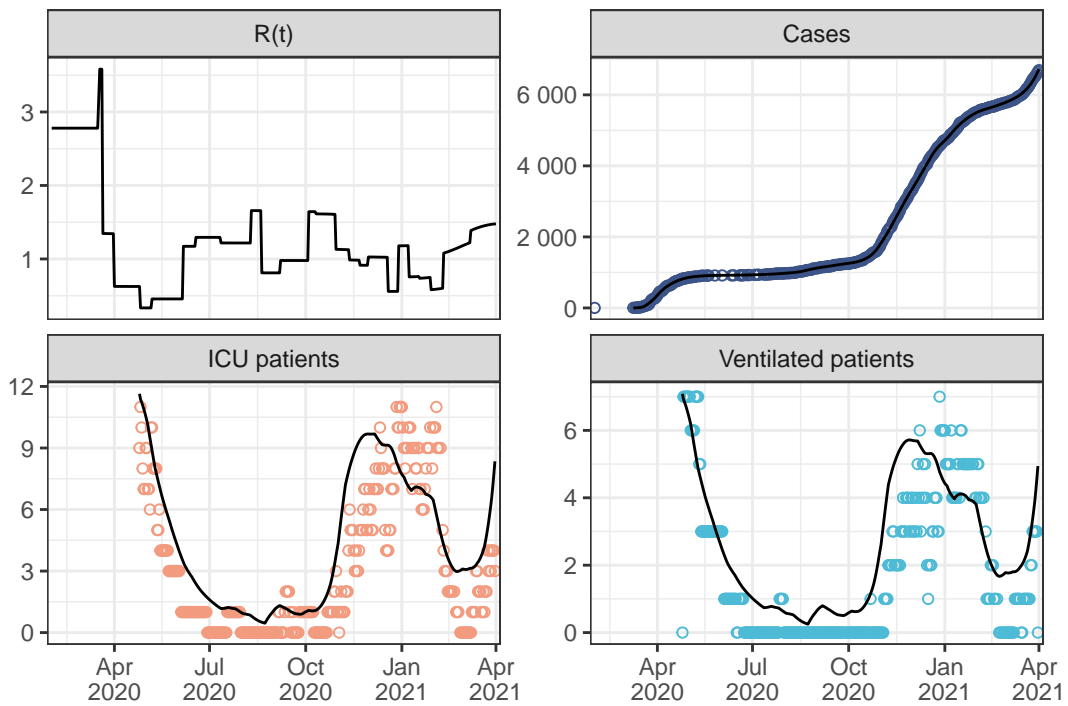

## LK Dahme–Spreewald

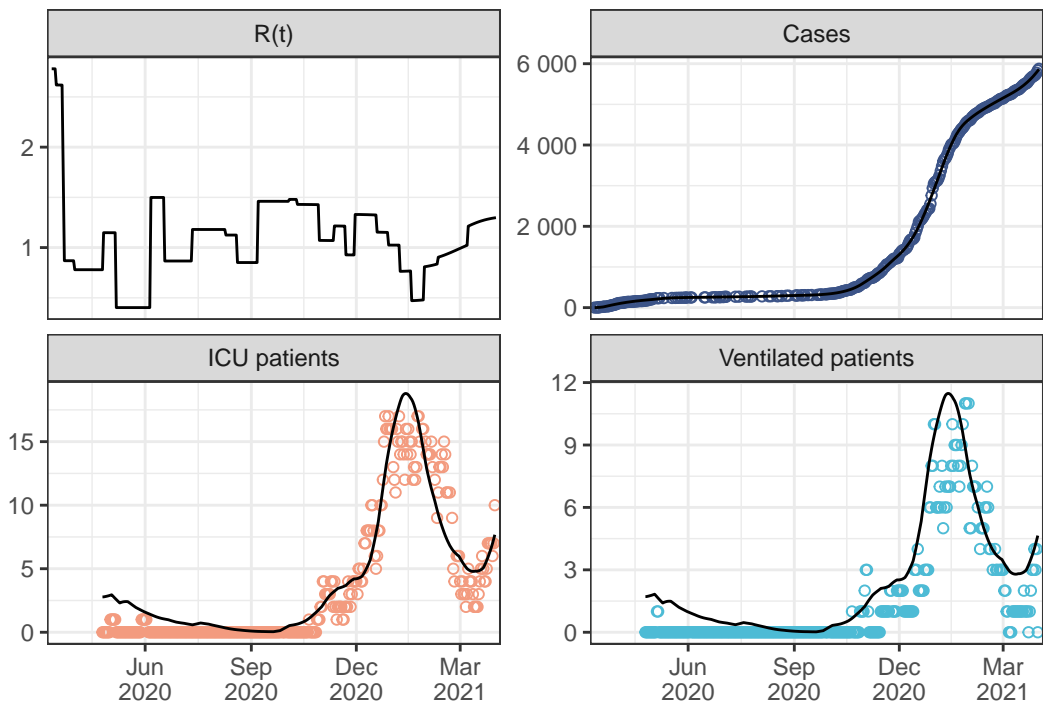

## LK Darmstadt–Dieburg

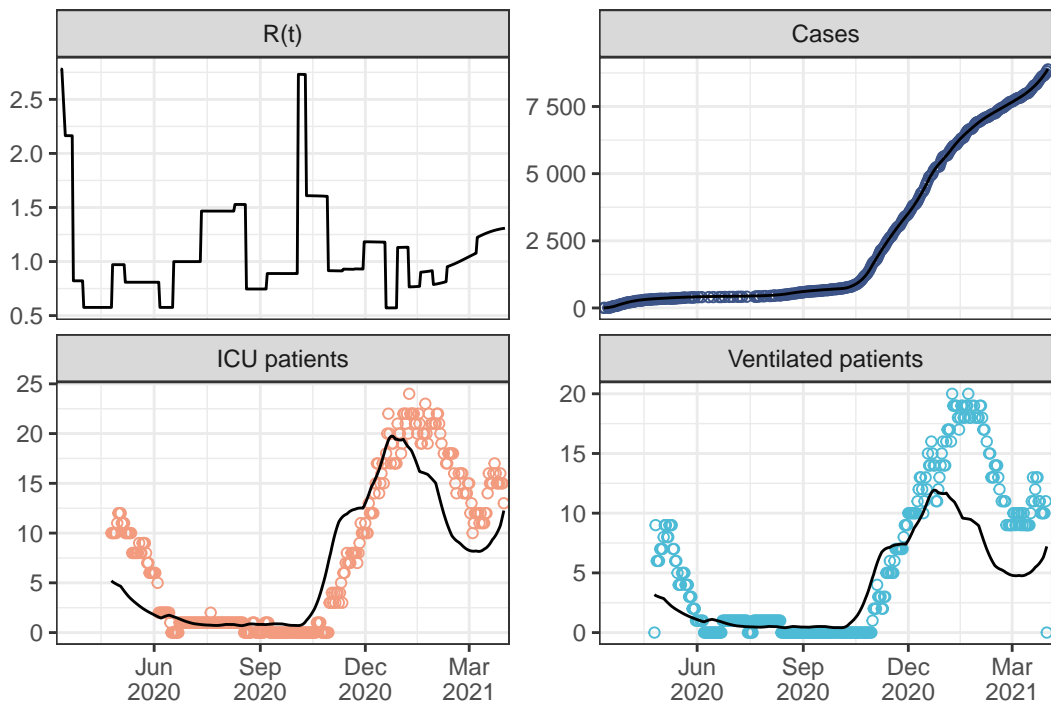

## LK Deggendorf

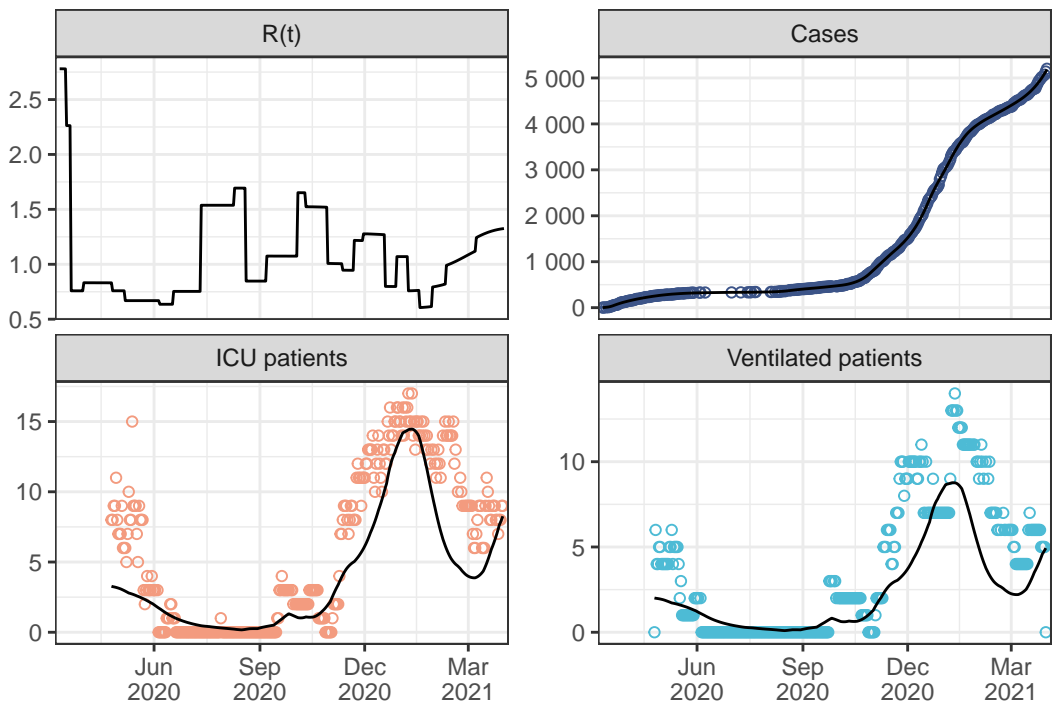

## LK Diepholz

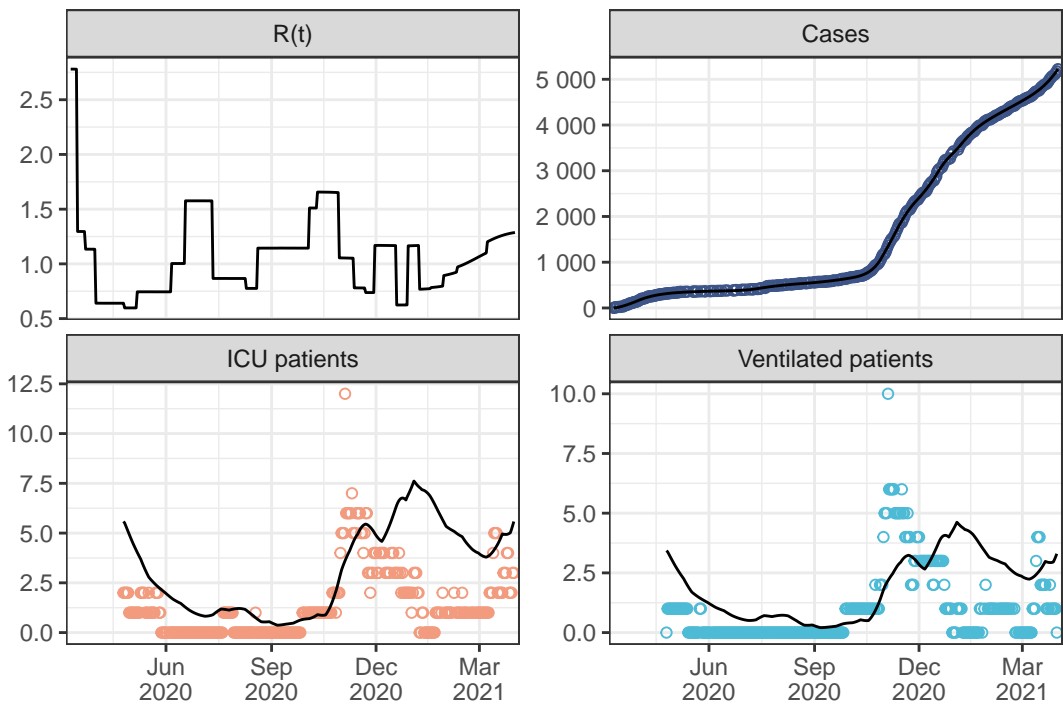

## LK Dillingen a.d.Donau

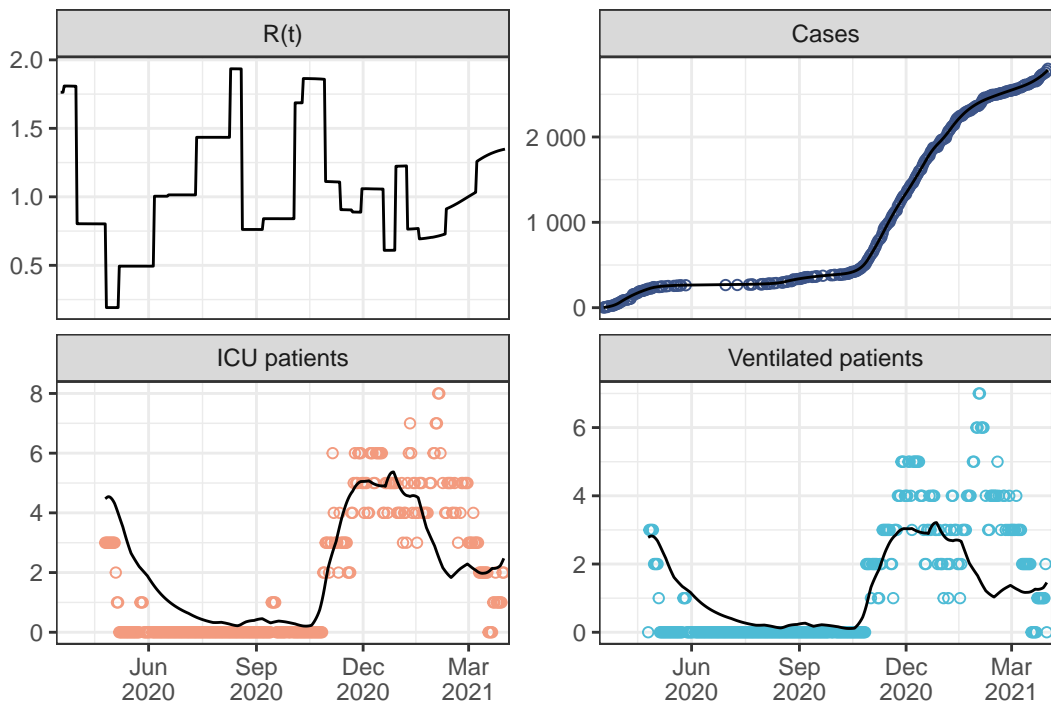

## LK Dingolfing-Landau

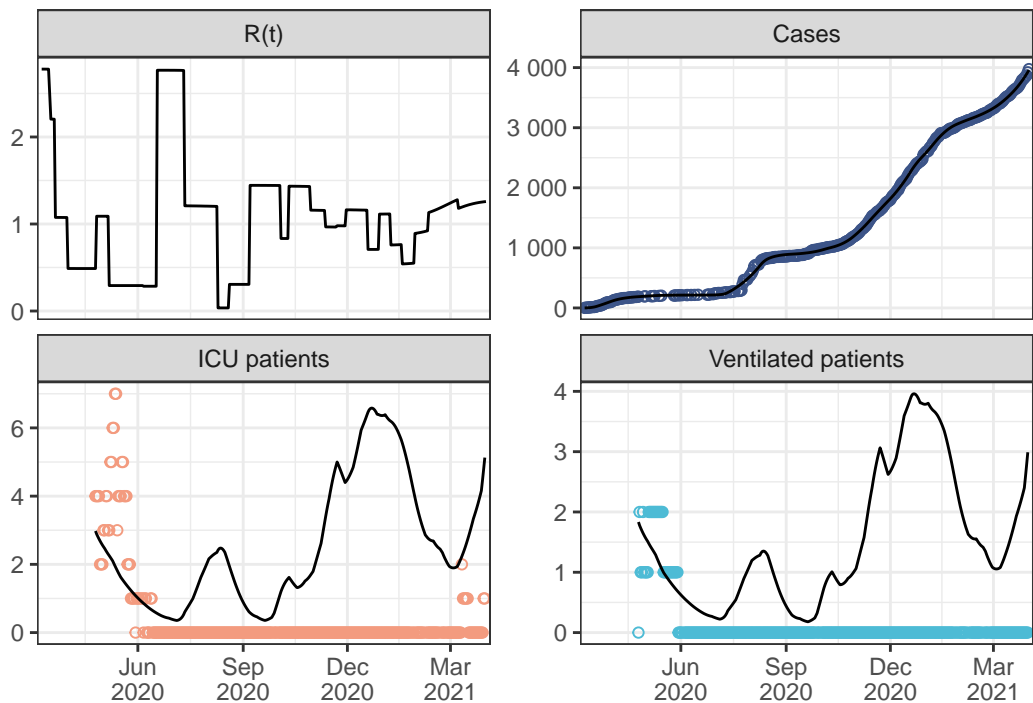

## LK Dithmarschen

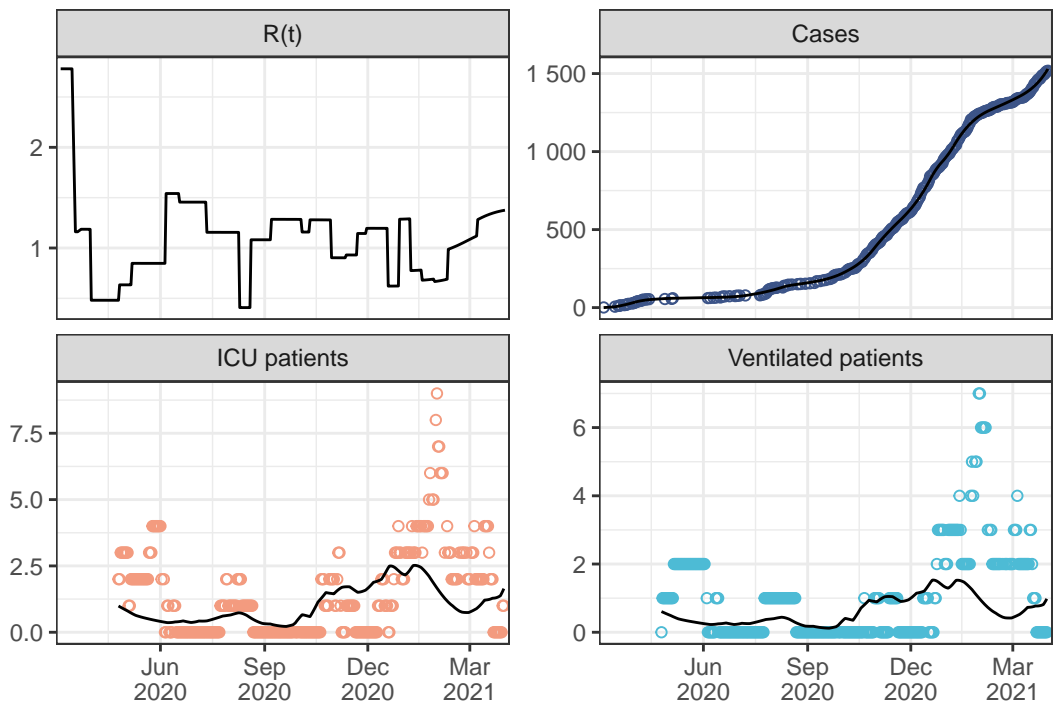

## LK Donau-Ries

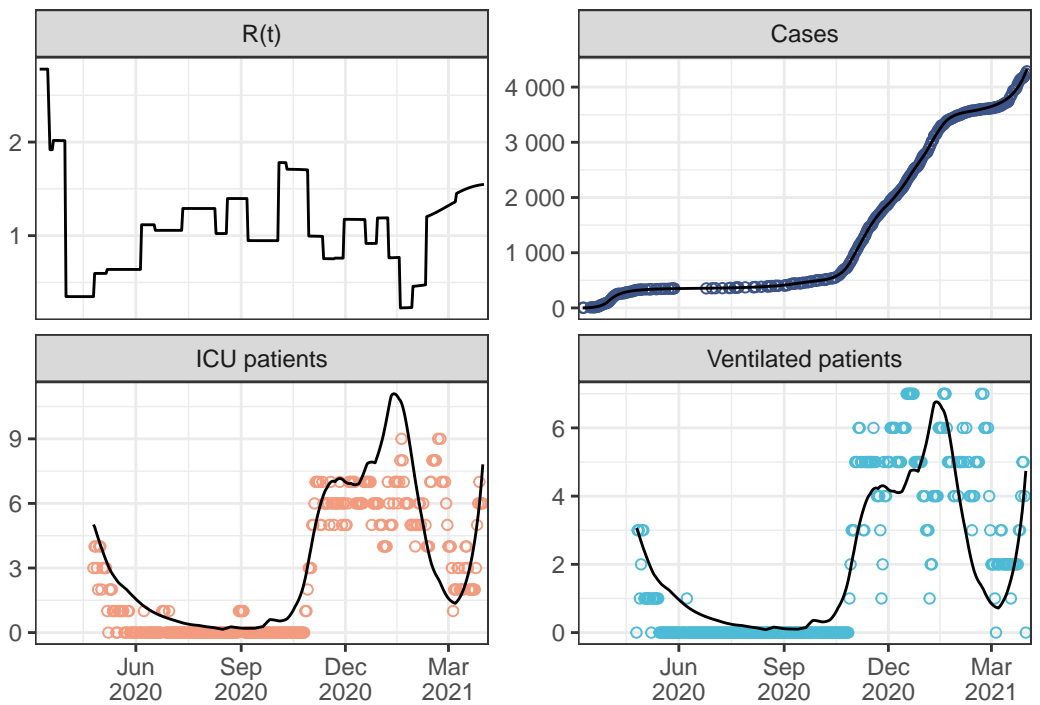

## LK Donnersbergkreis

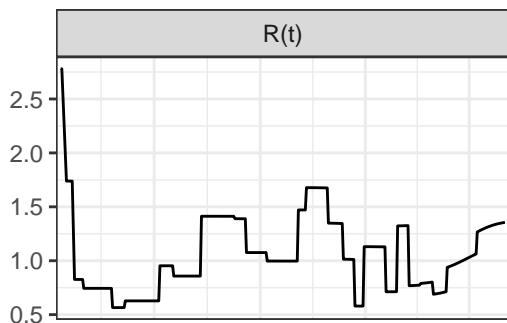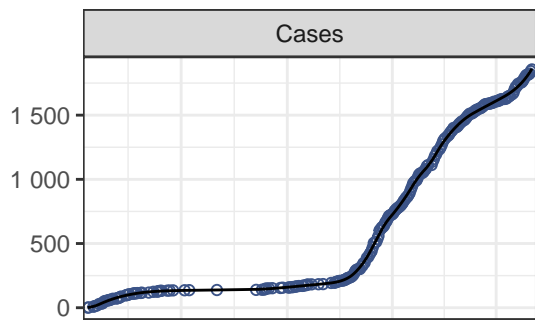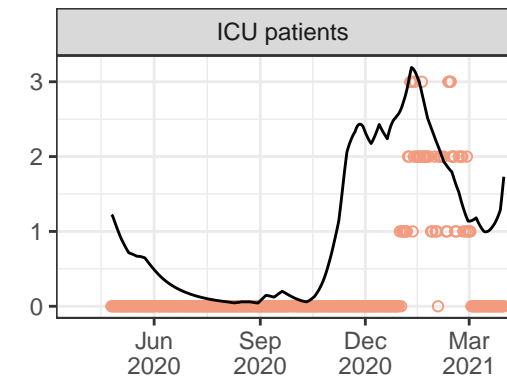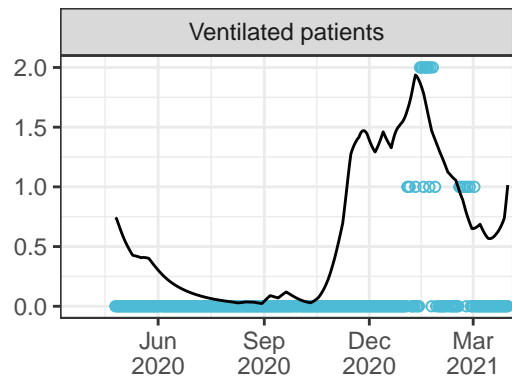

## LK Düren

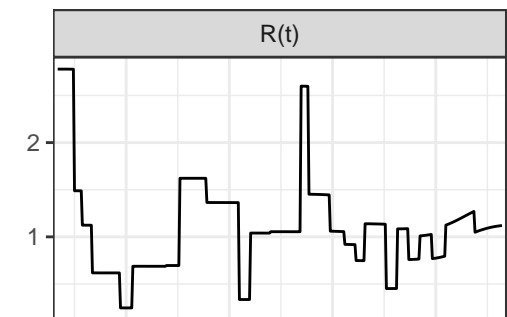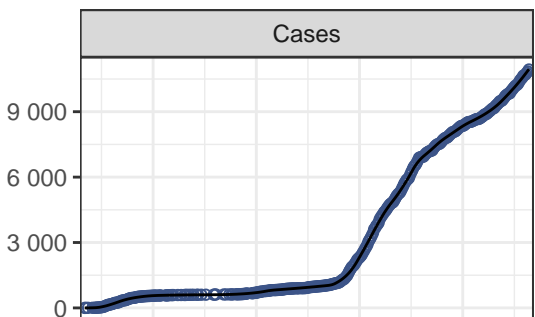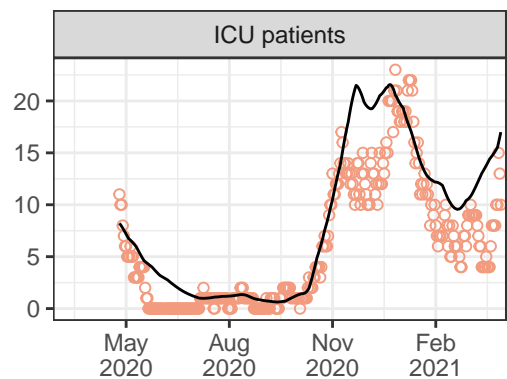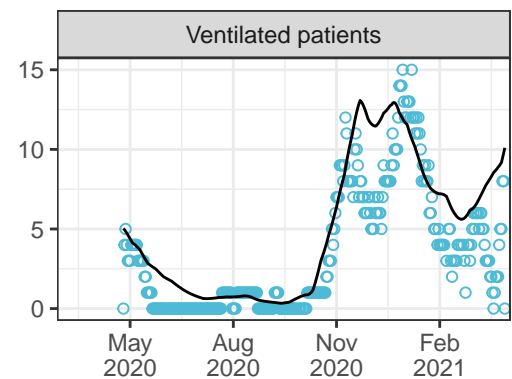

## LK Ebersberg

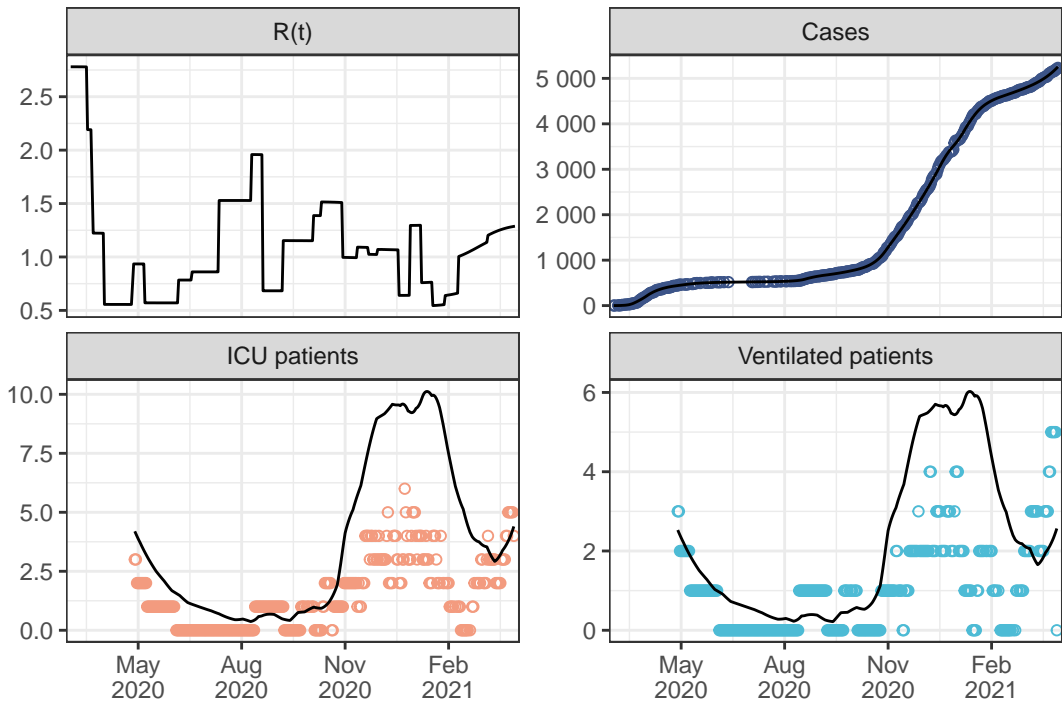

## LK Eichsfeld

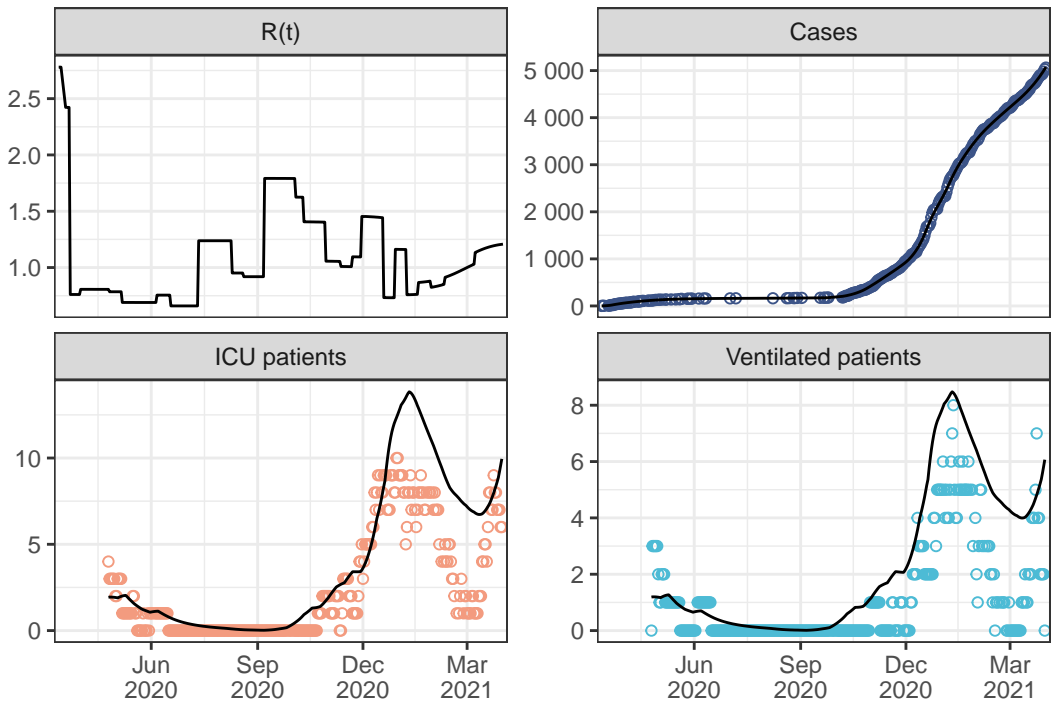

## LK Eichstätt

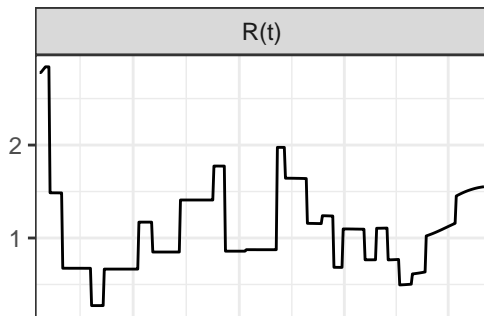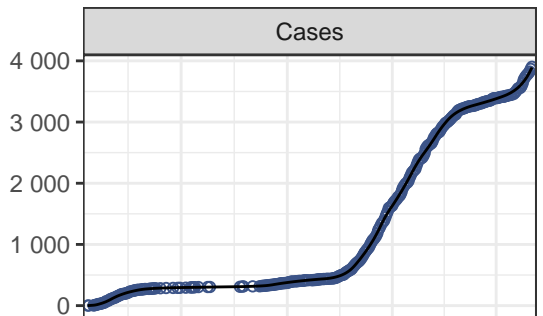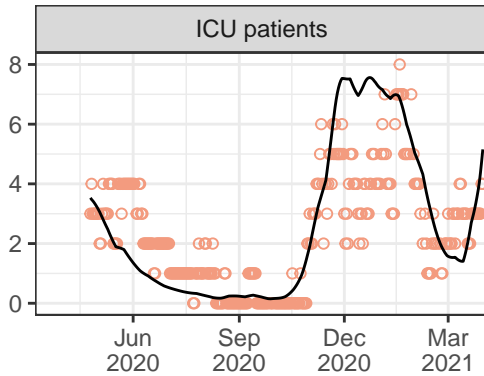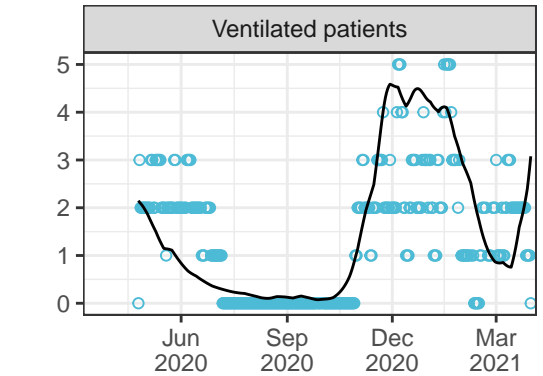

## LK Elbe-Elster

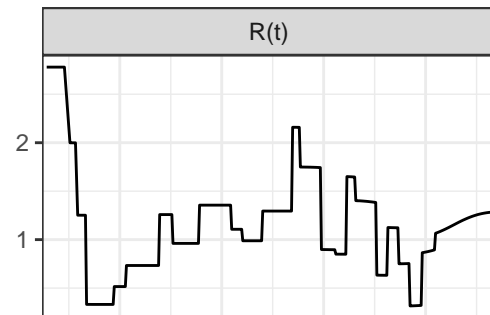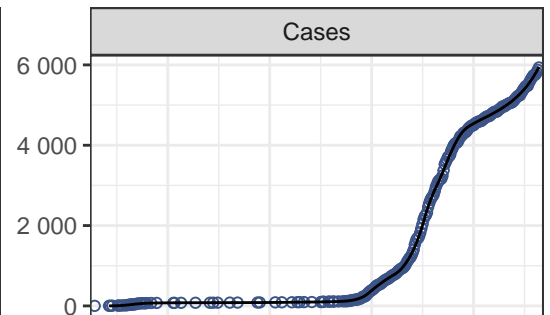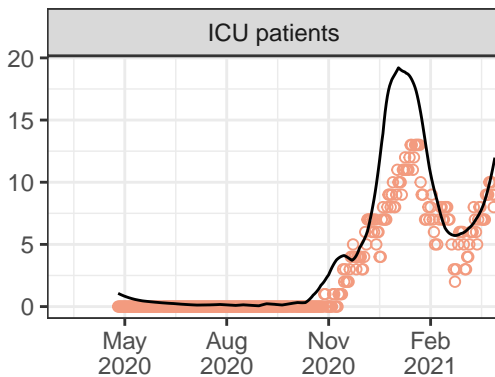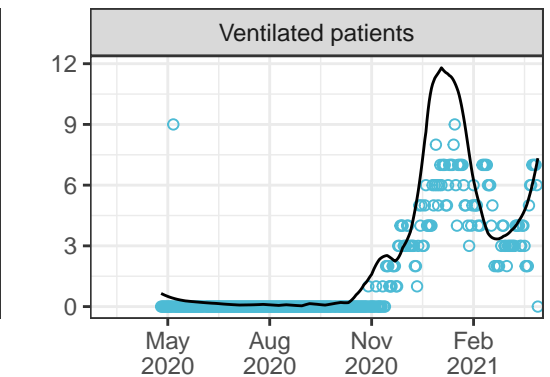

# LK Emmendingen

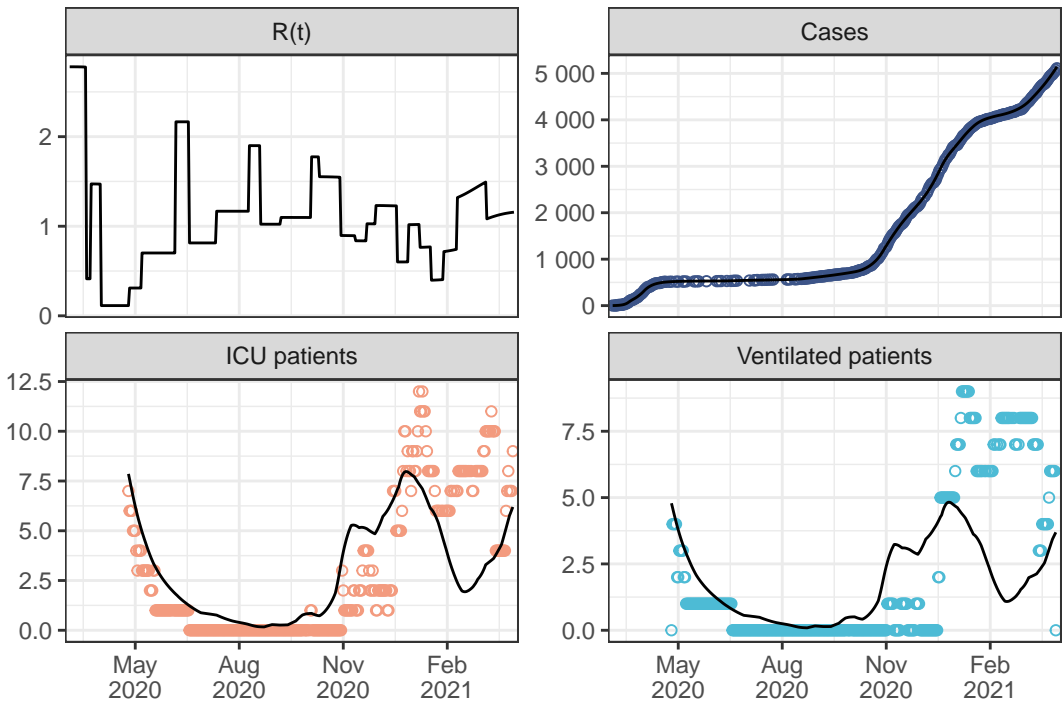

# LK Emsland

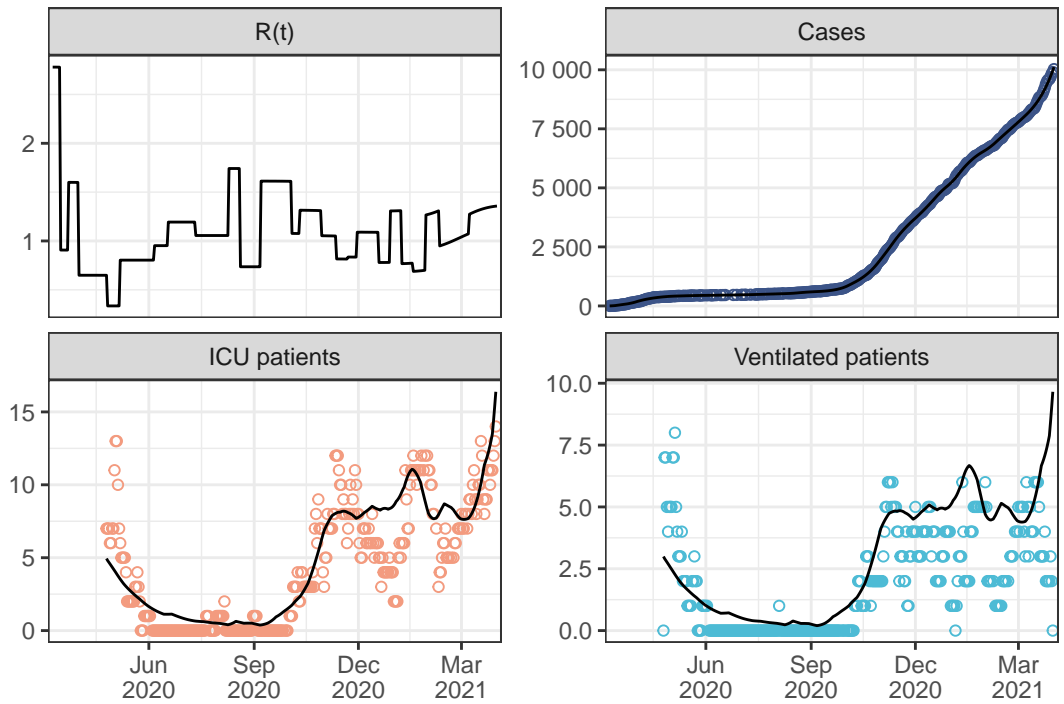

## LK Ennepe-Ruhr-Kreis

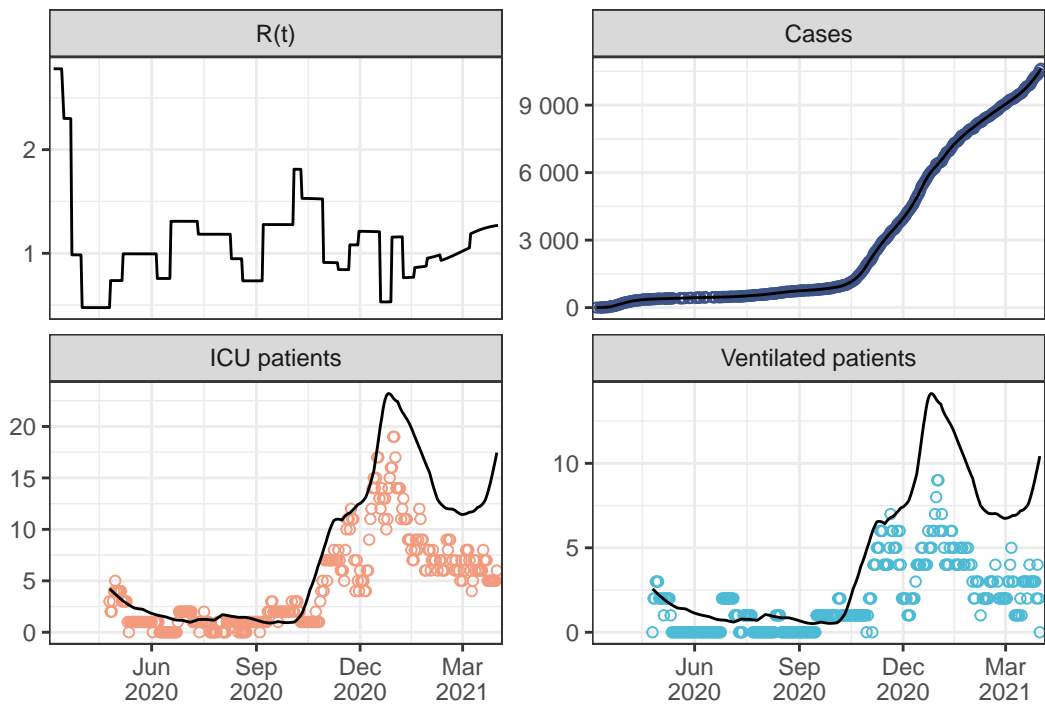

## LK Enzkreis

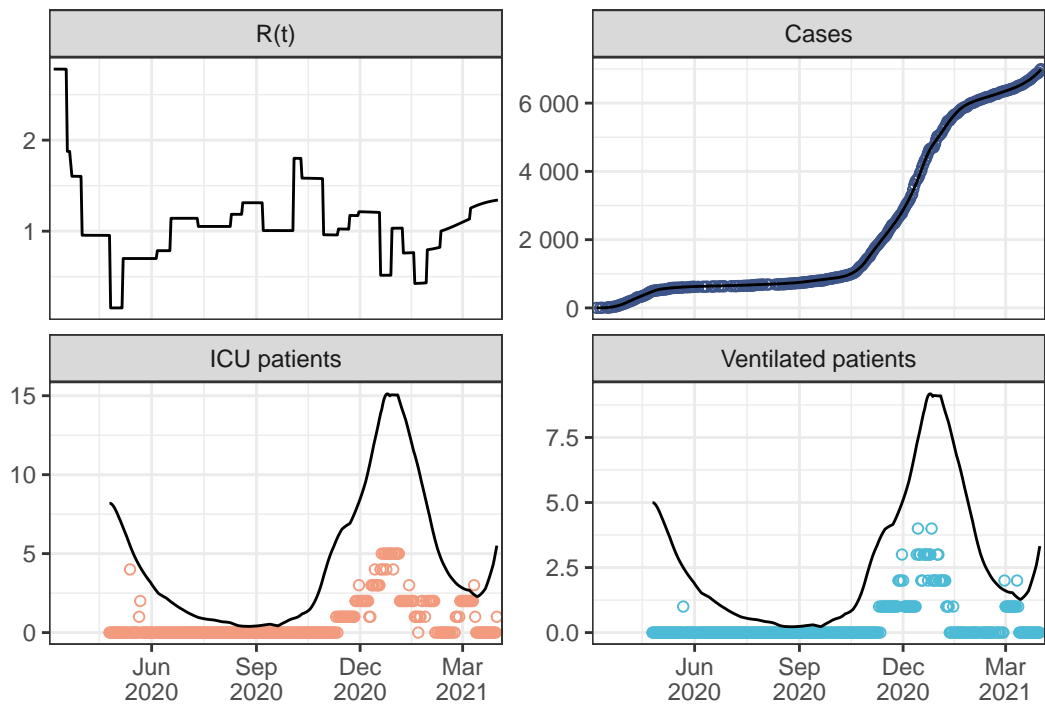

## LK Erding

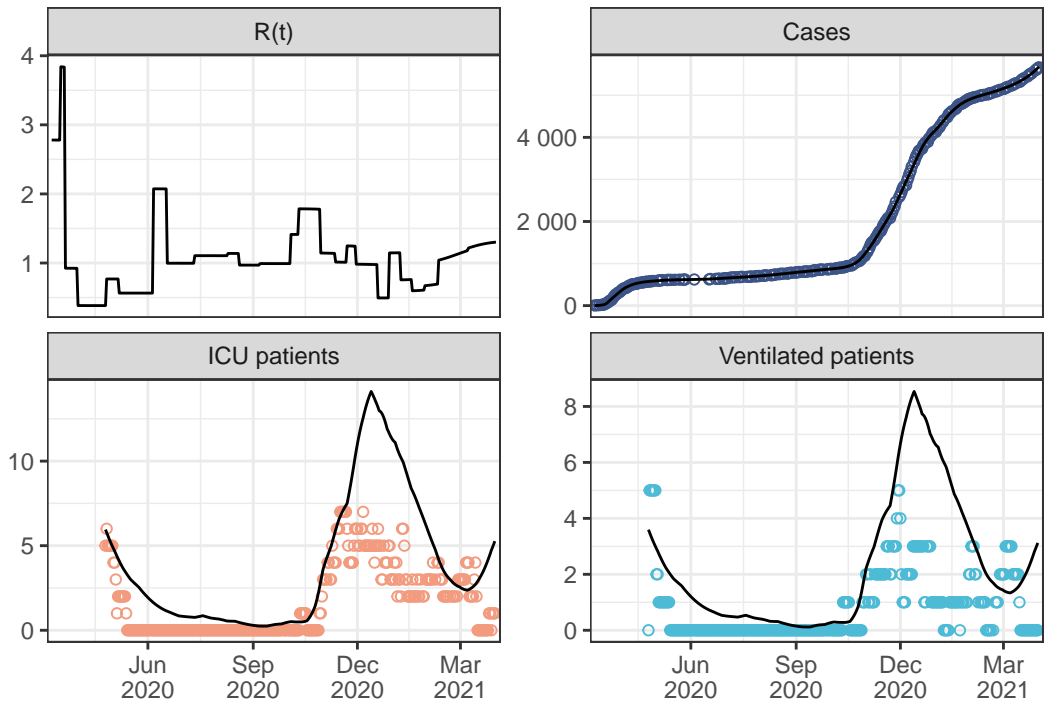

## LK Erlangen–Höchstadt

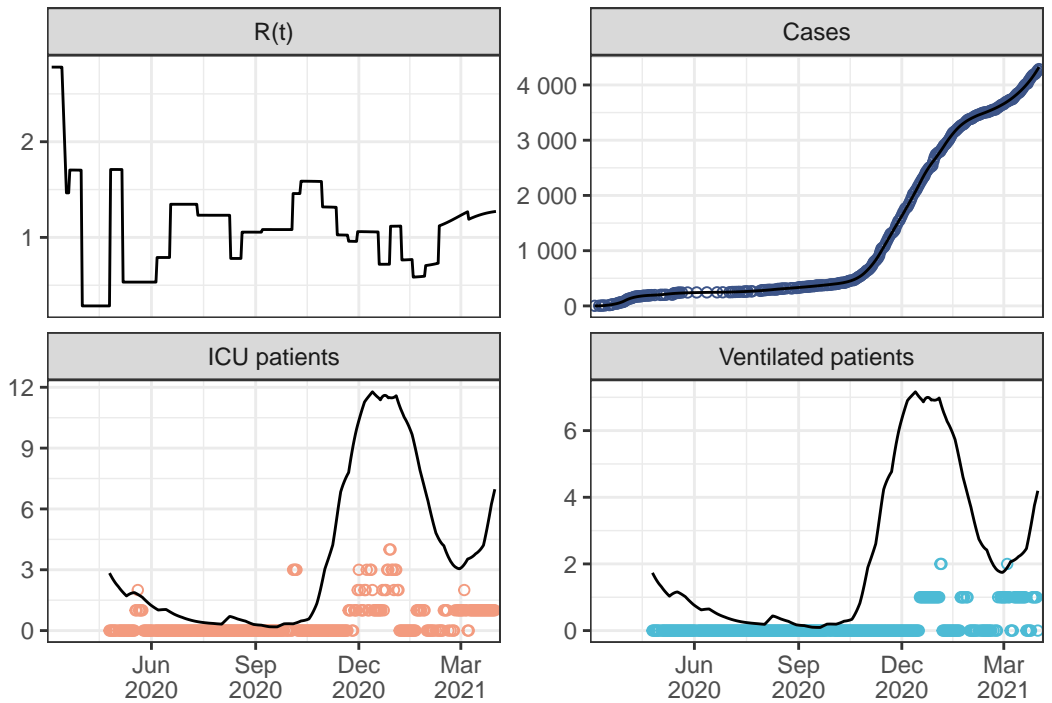

## LK Erzgebirgskreis

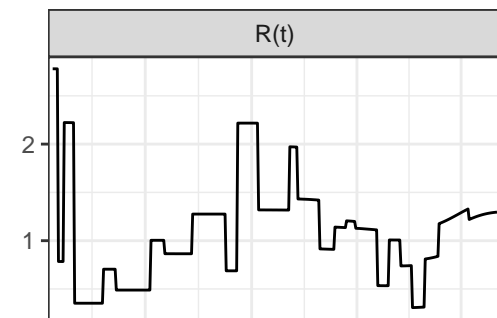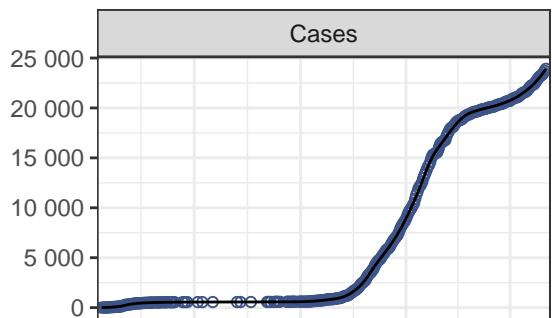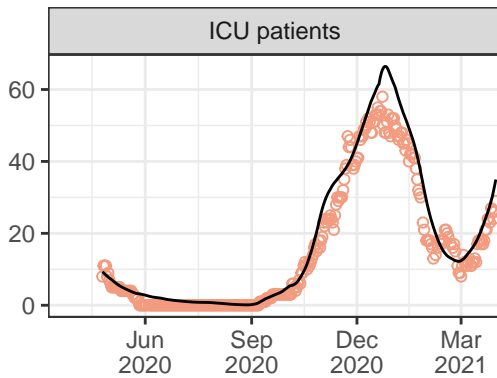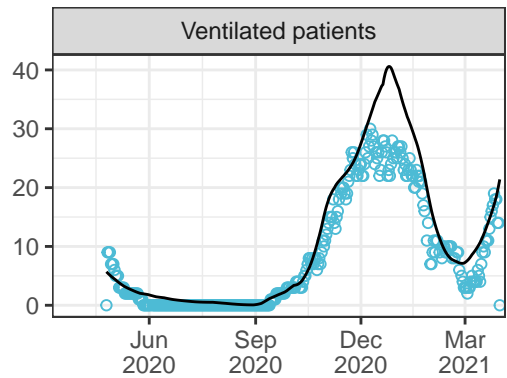

## LK Esslingen

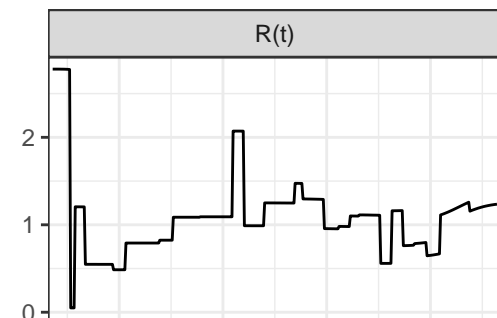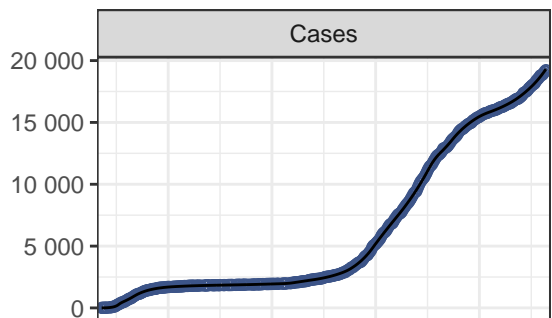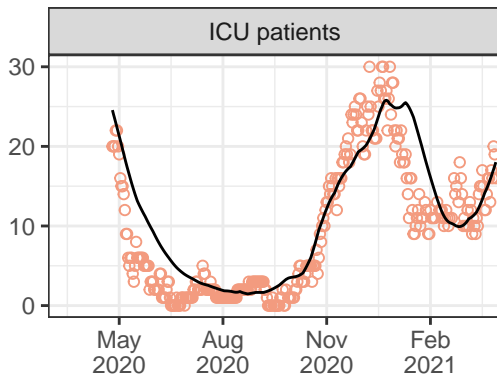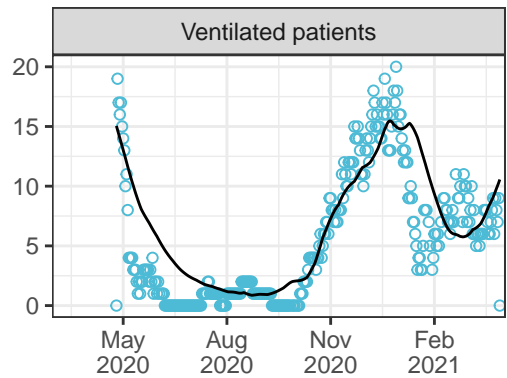

## LK Euskirchen

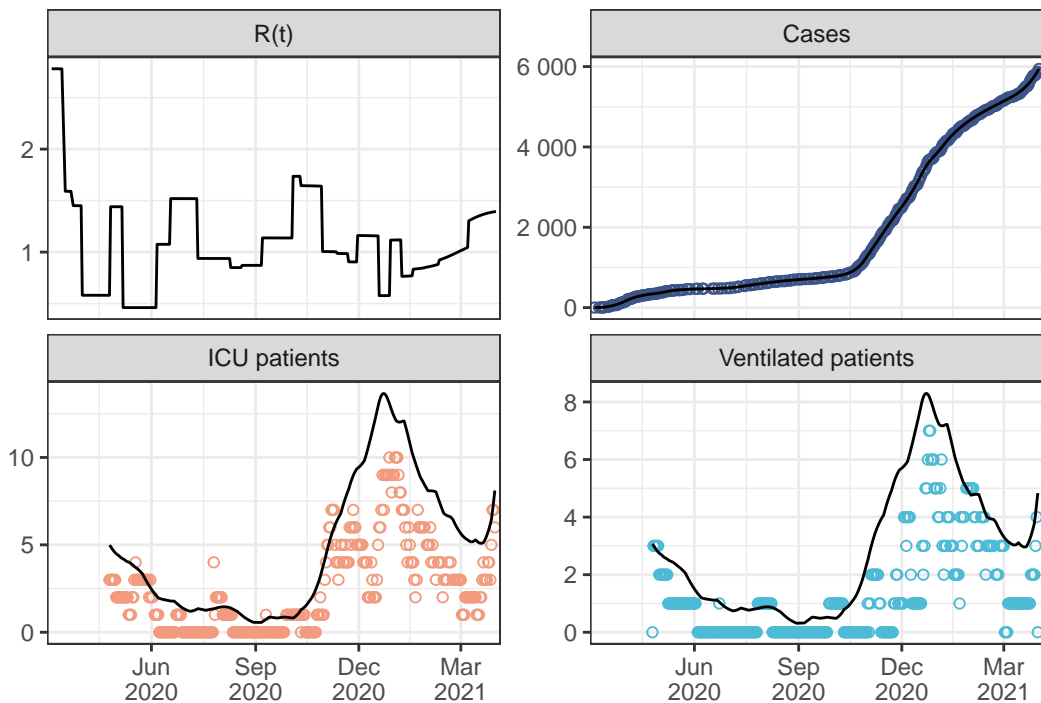

## LK Forchheim

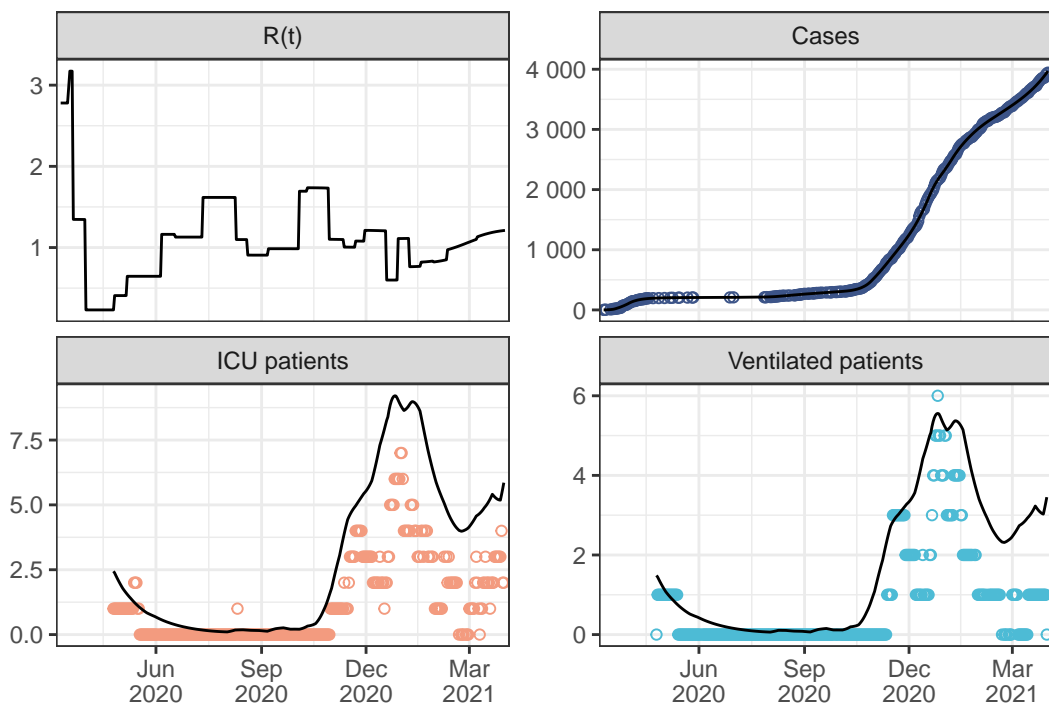

## LK Freising

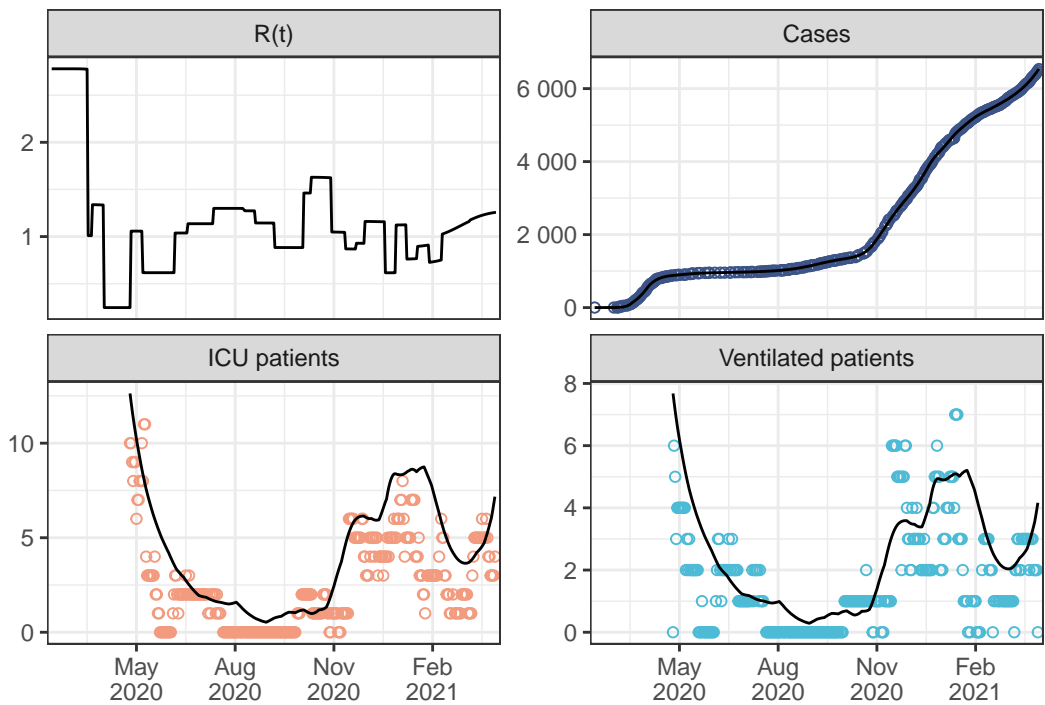

## LK Freudenstadt

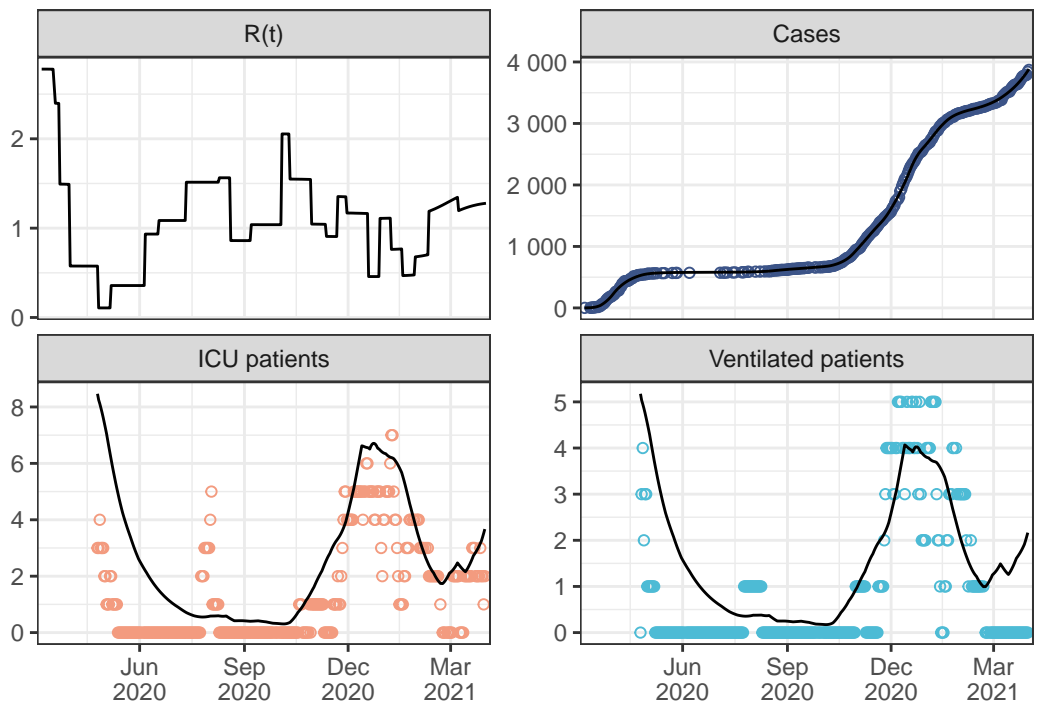

## LK Freyung–Grafenau

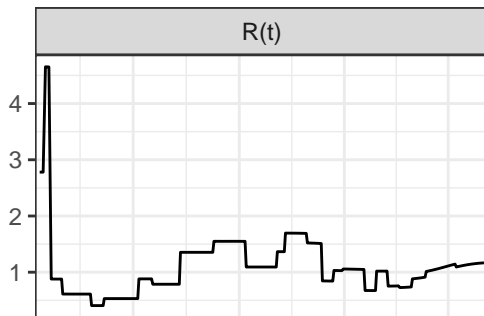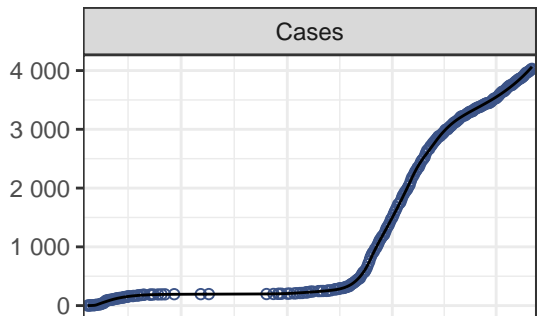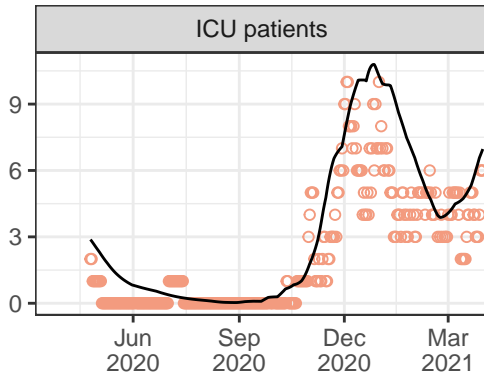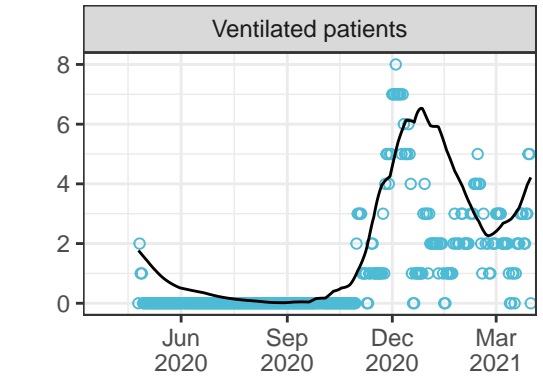

## LK Friesland

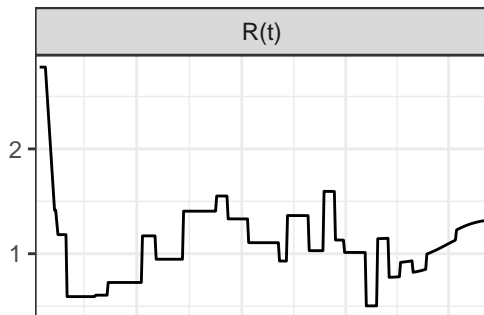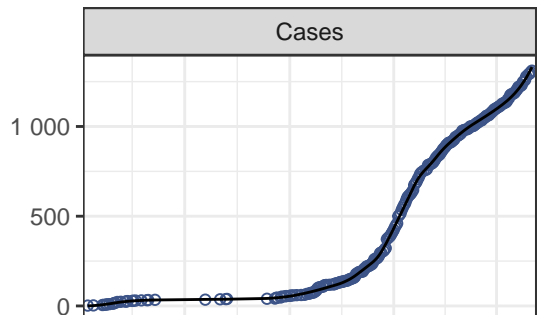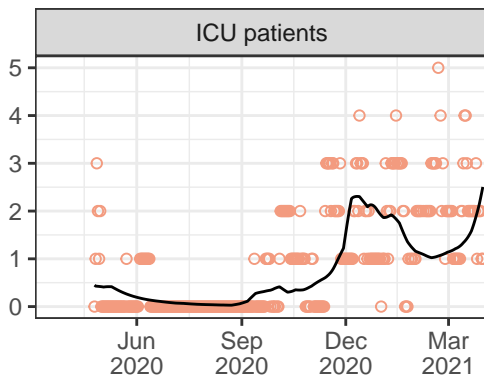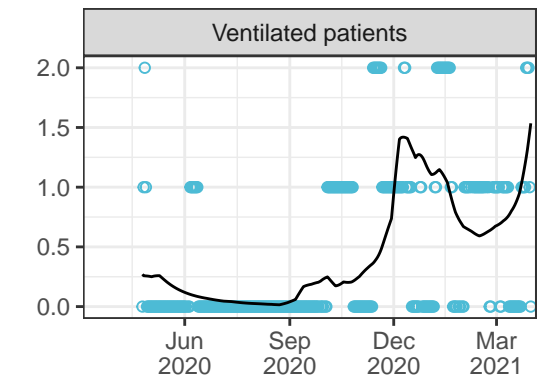

## LK Fulda

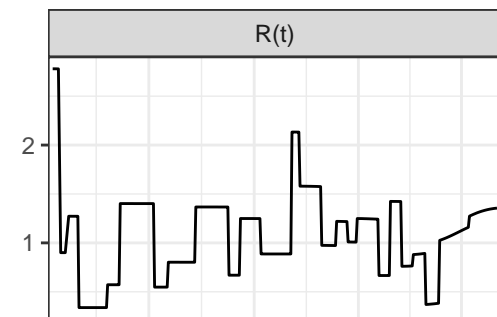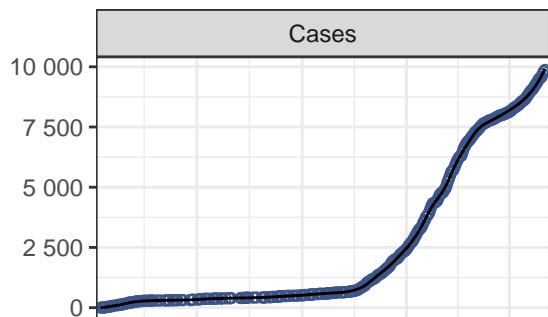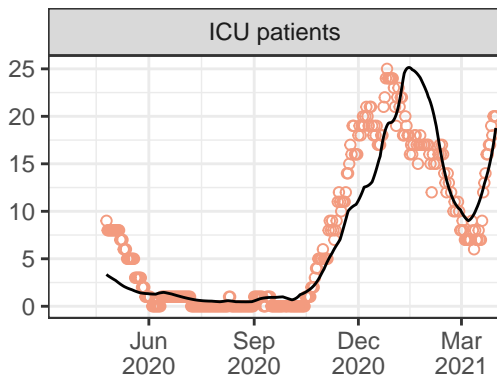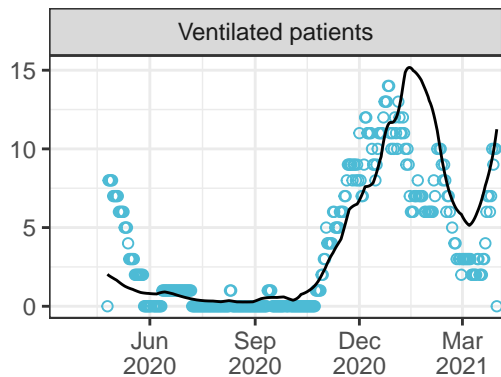

## LK Fürstenfeldbruck

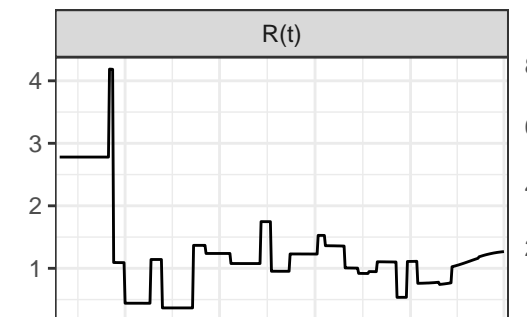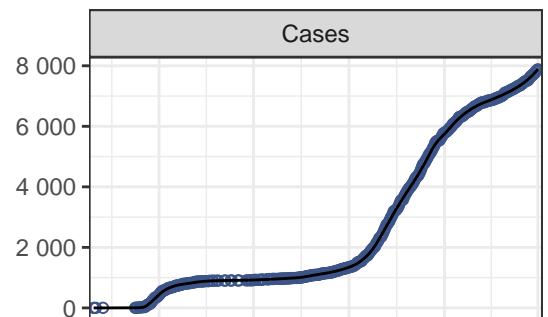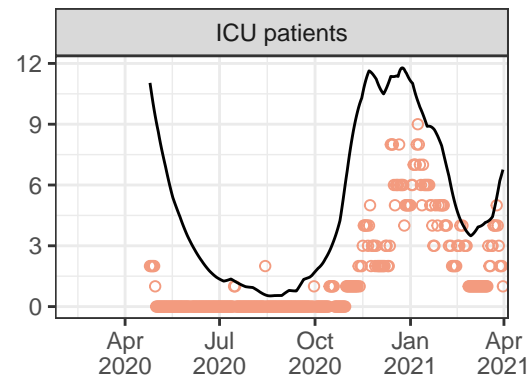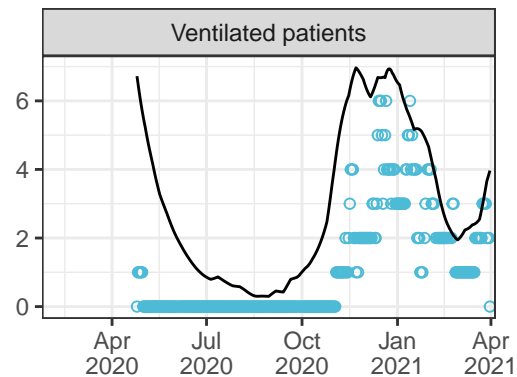

# LK Fürth

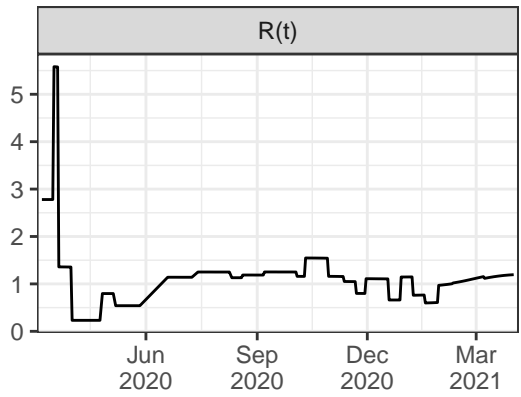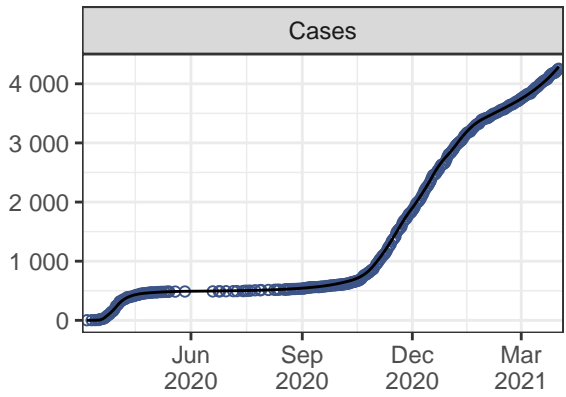

# LK Garmisch-Partenkirchen

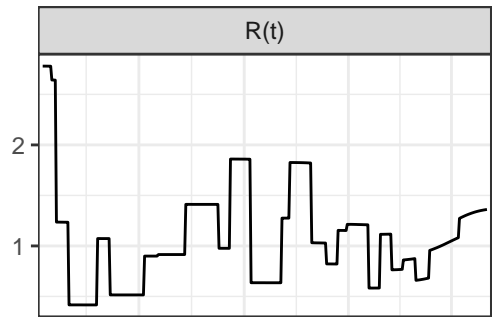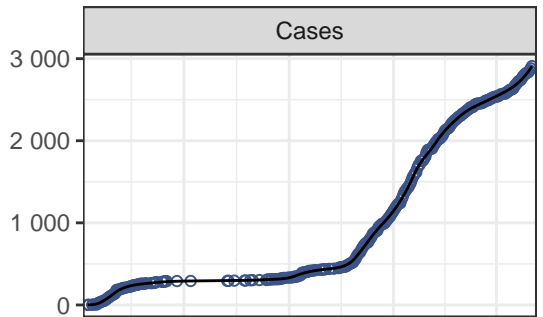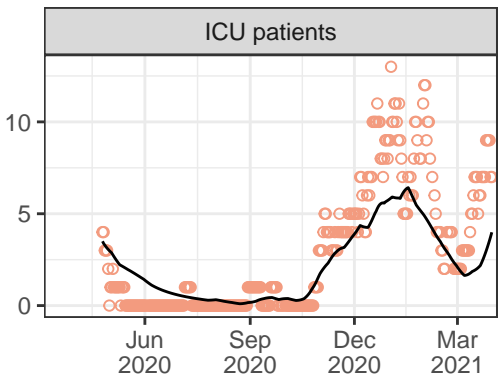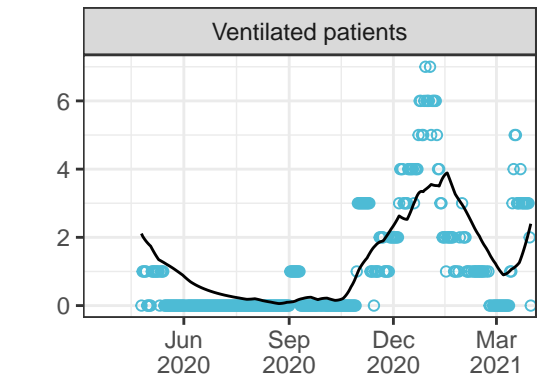

## LK Gernersheim

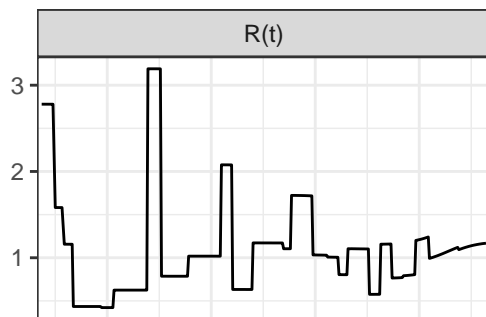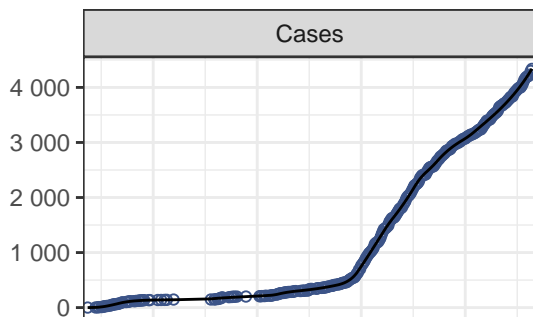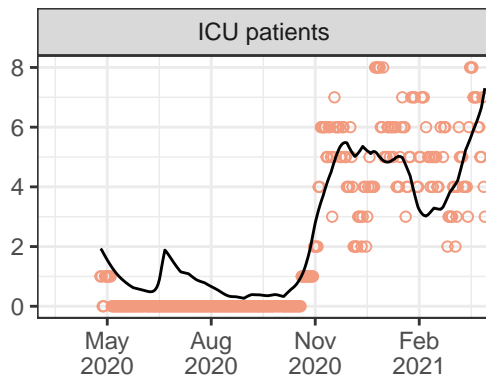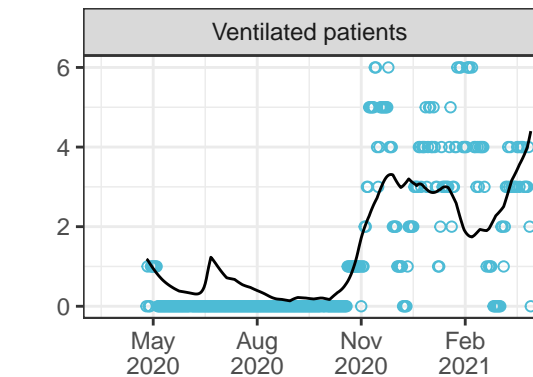

## LK Gießen

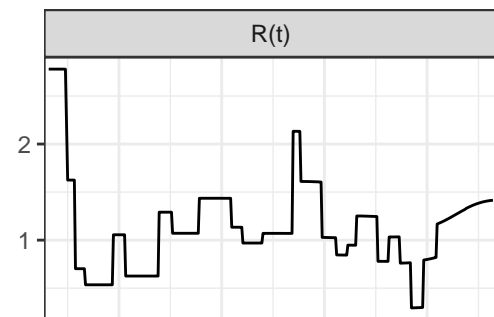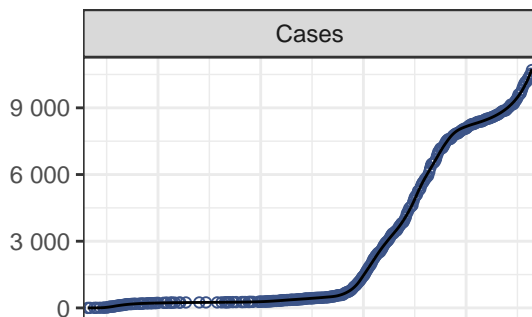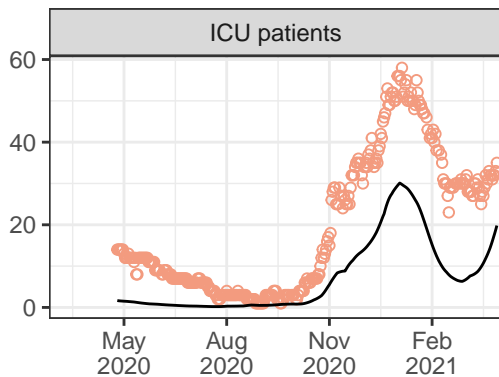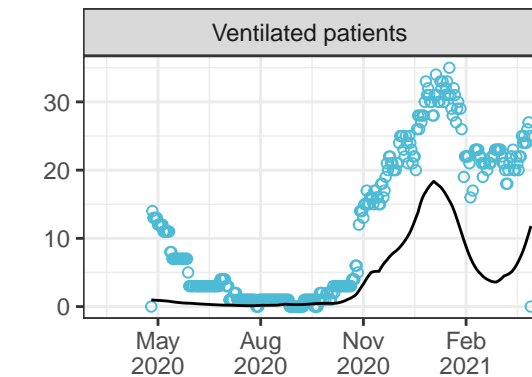

## LK Gifhorn

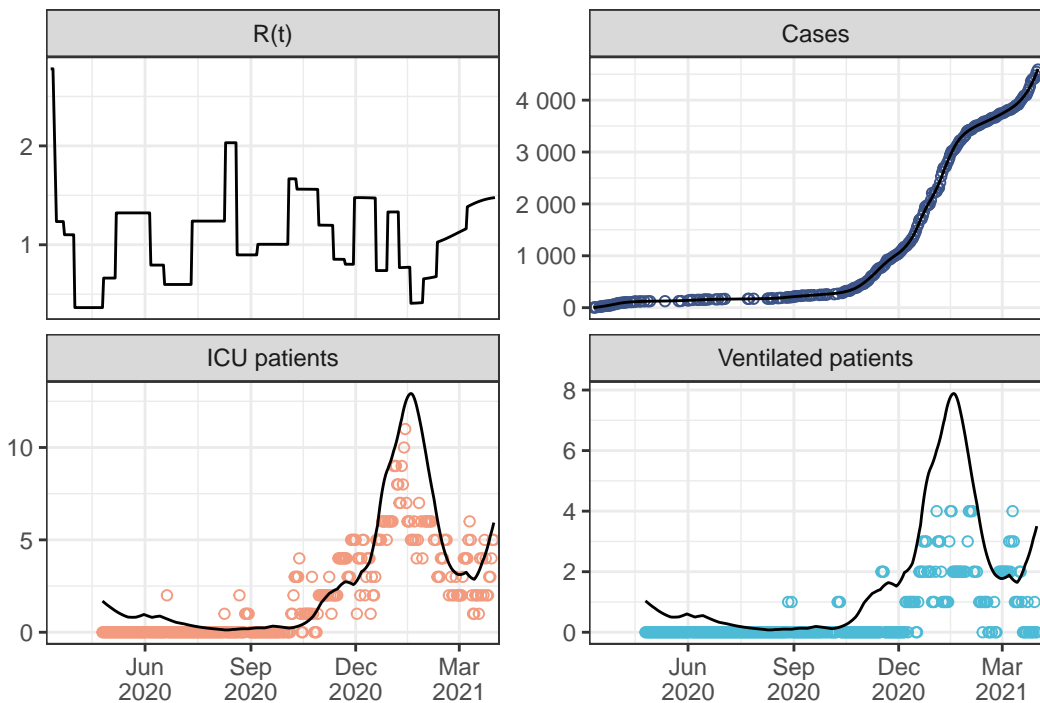

## LK Göppingen

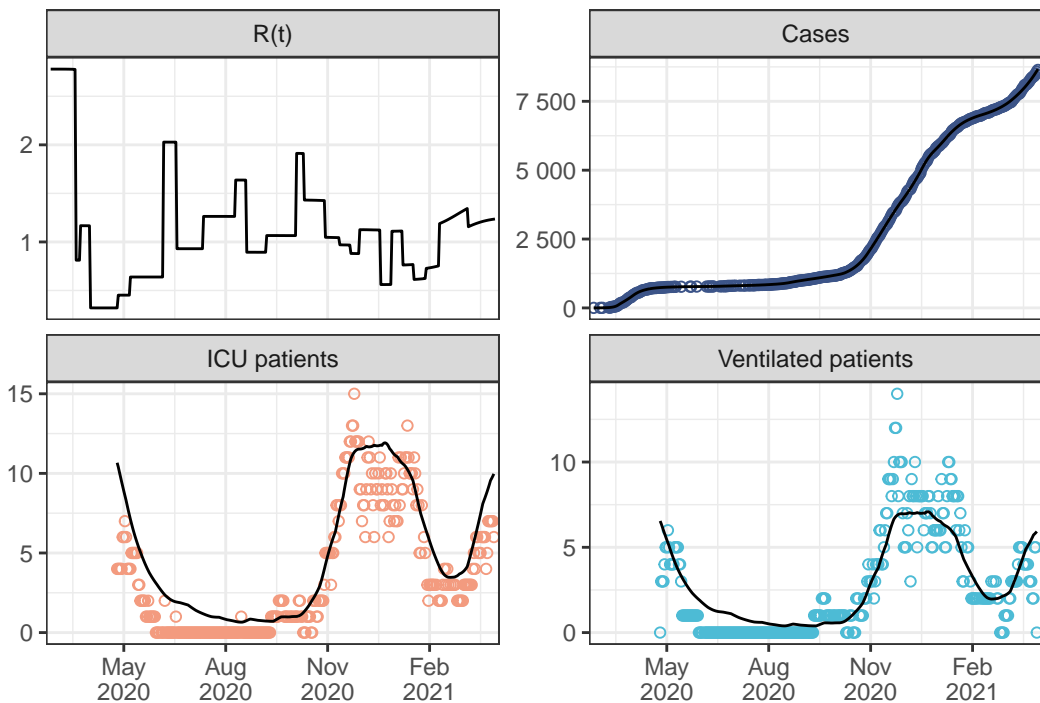

## LK Görlitz

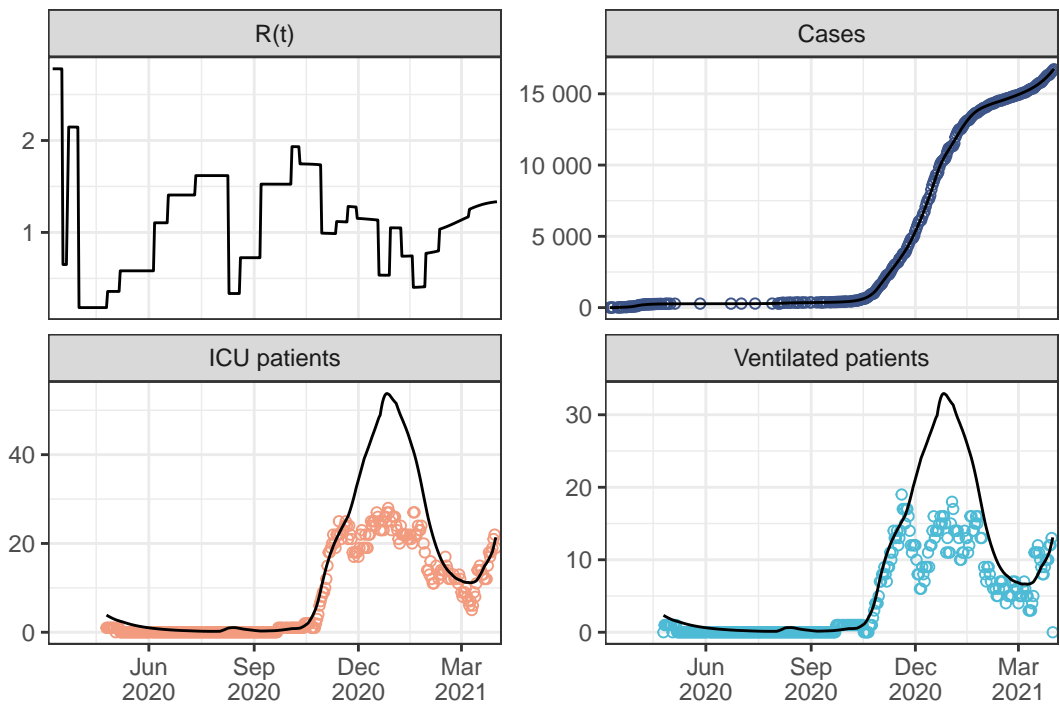

## LK Goslar

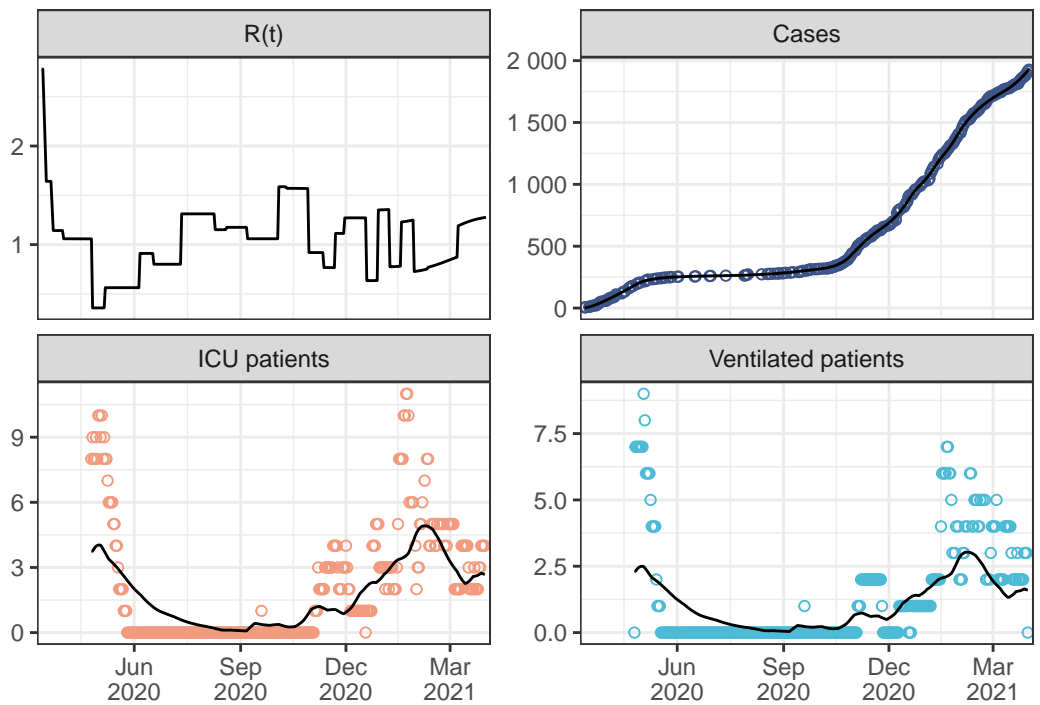

## LK Gotha

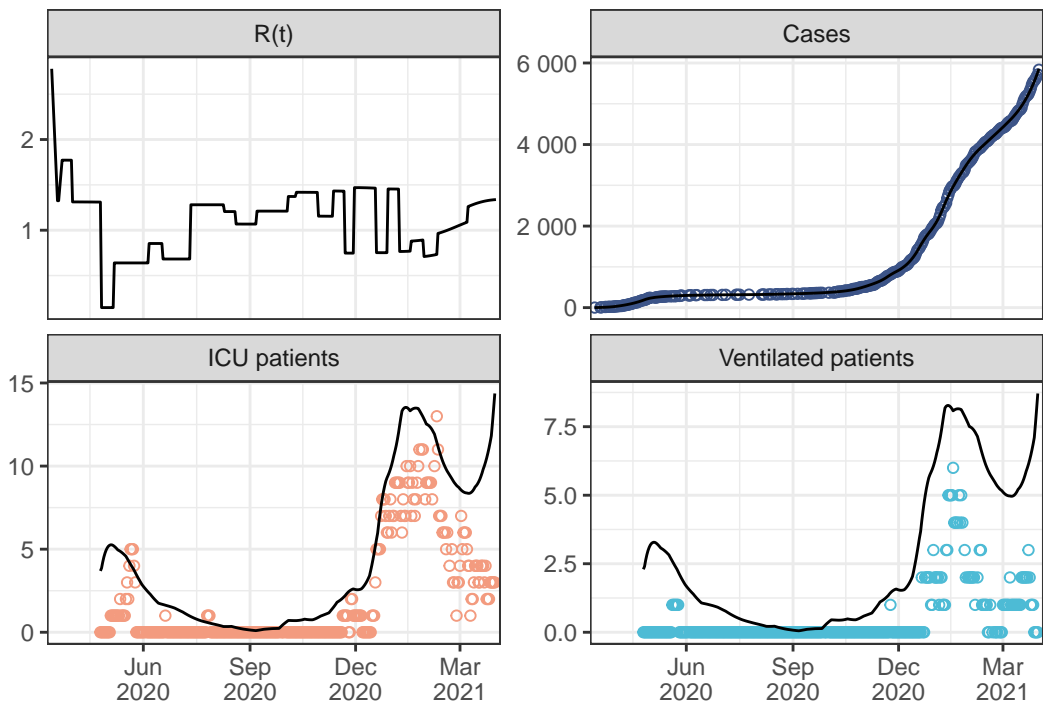

## LK Göttingen

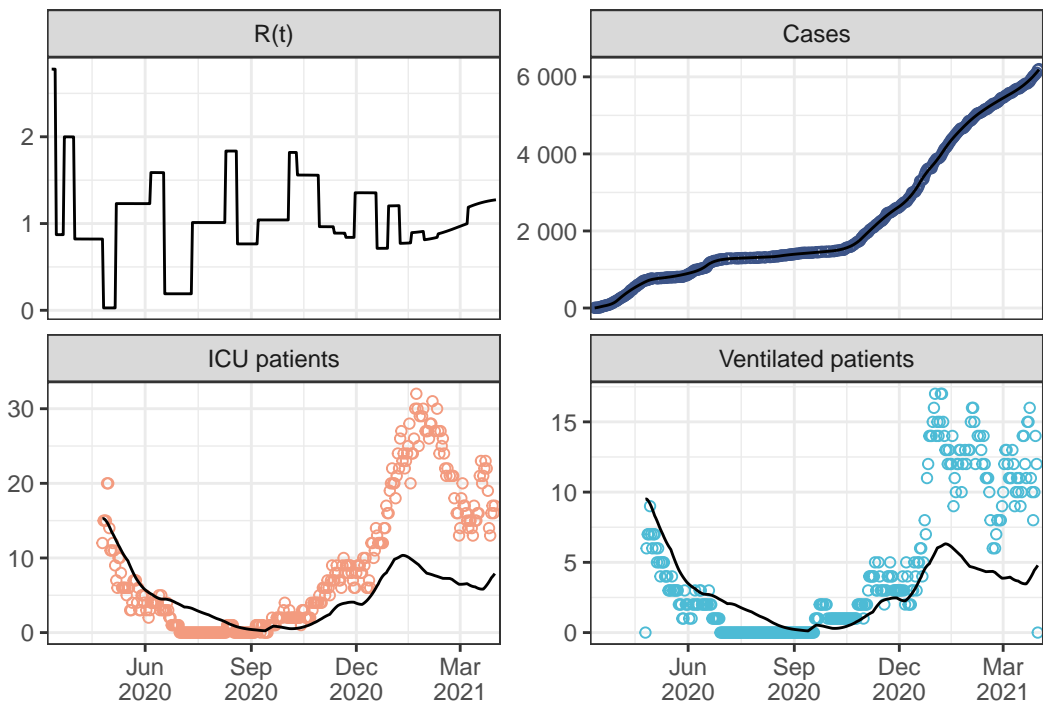

## LK Grafschaft Bentheim

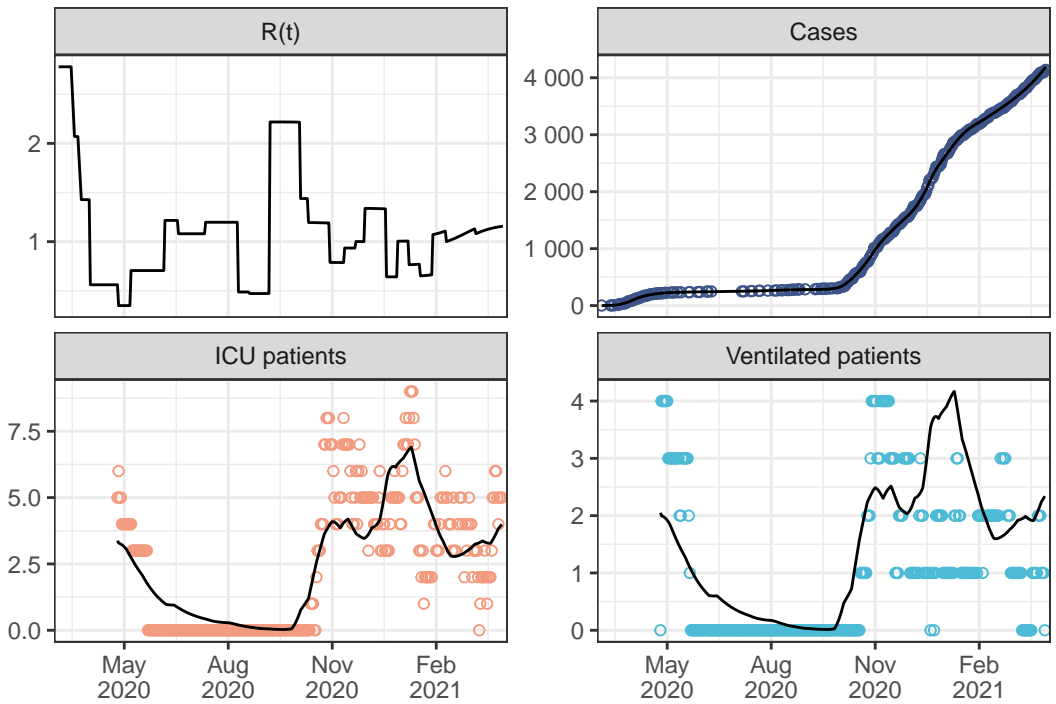

## LK Greiz

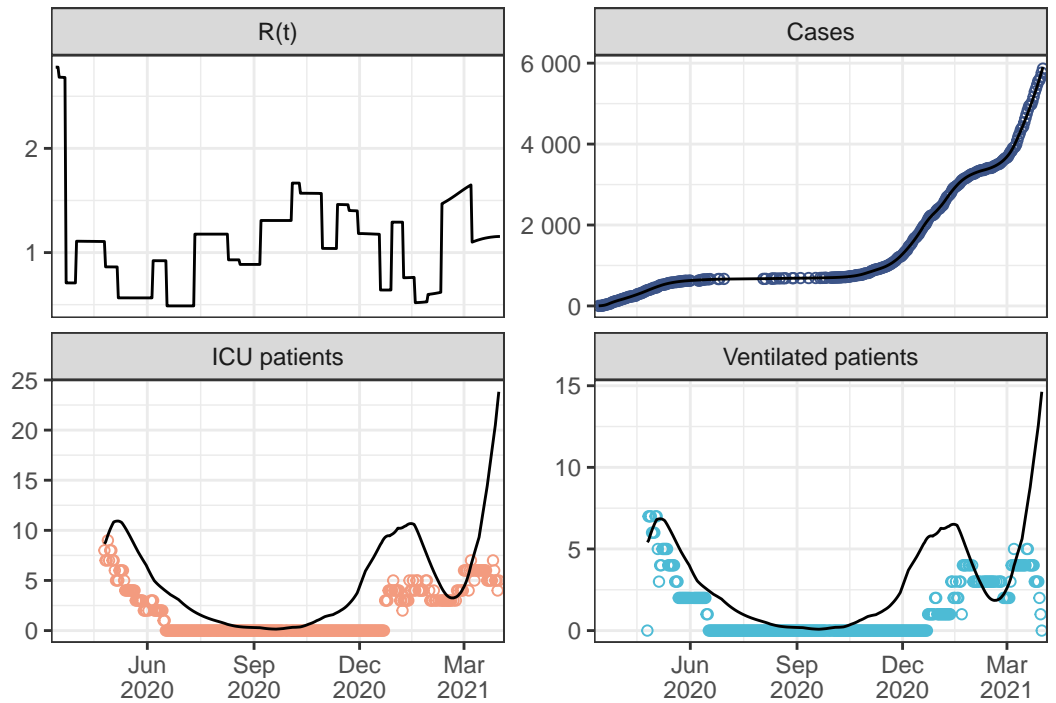

## LK Groß-Gerau

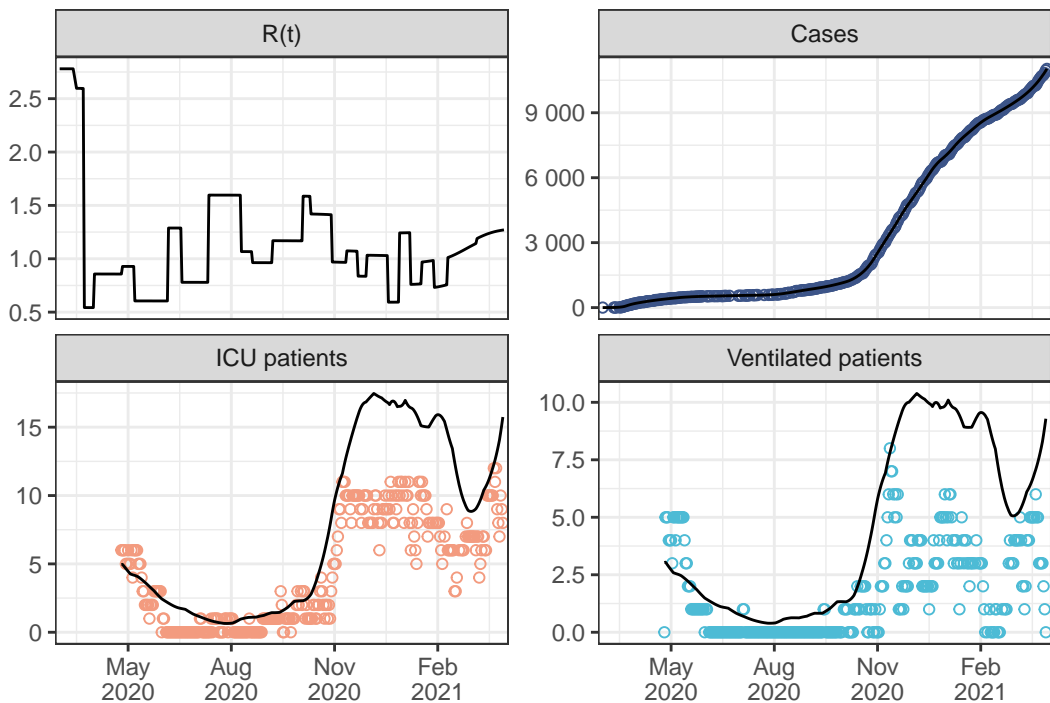

## LK Günzburg

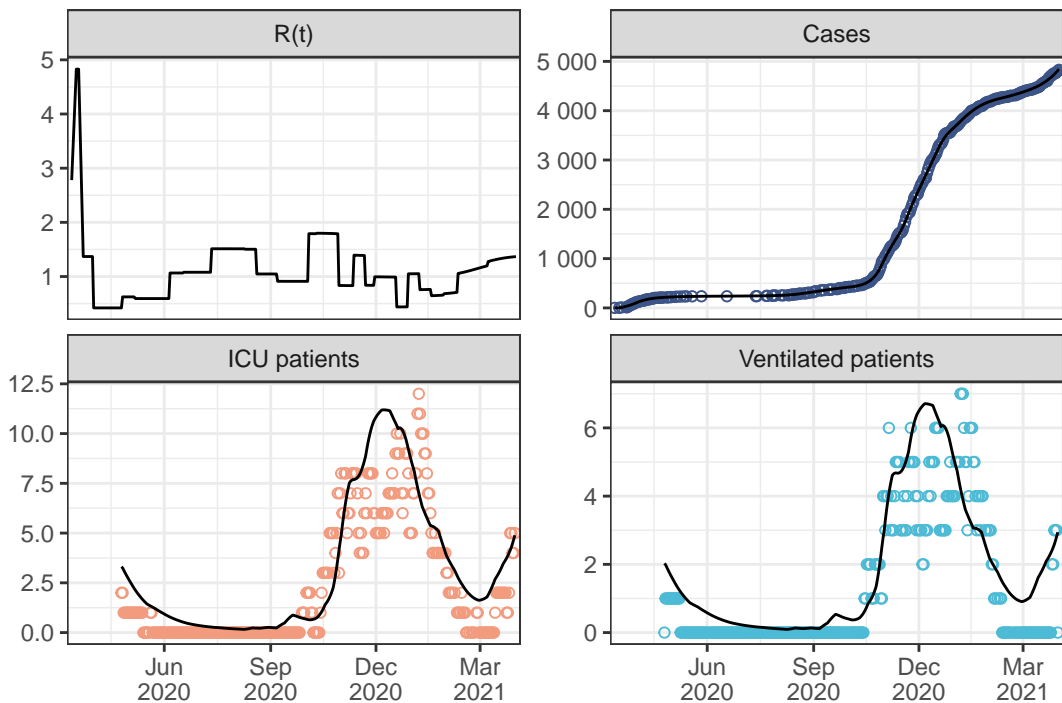

## LK Gütersloh

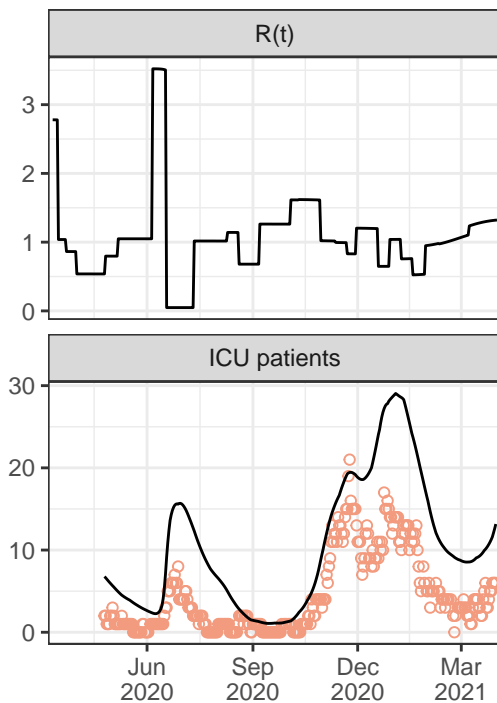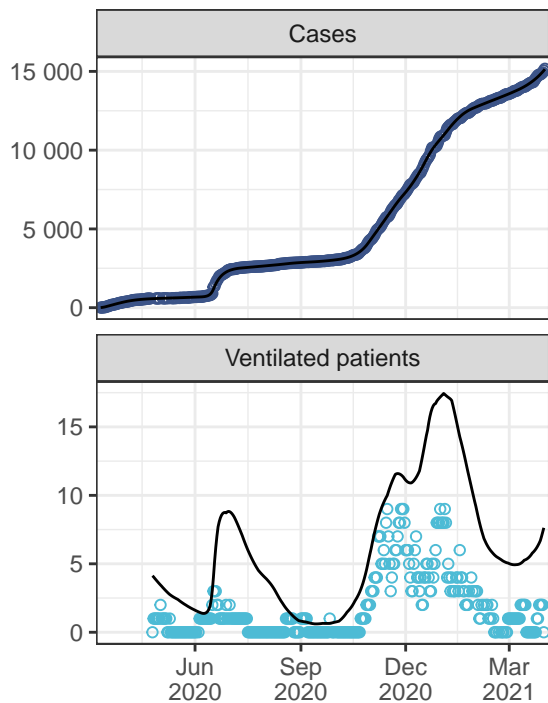

## LK Haßberge

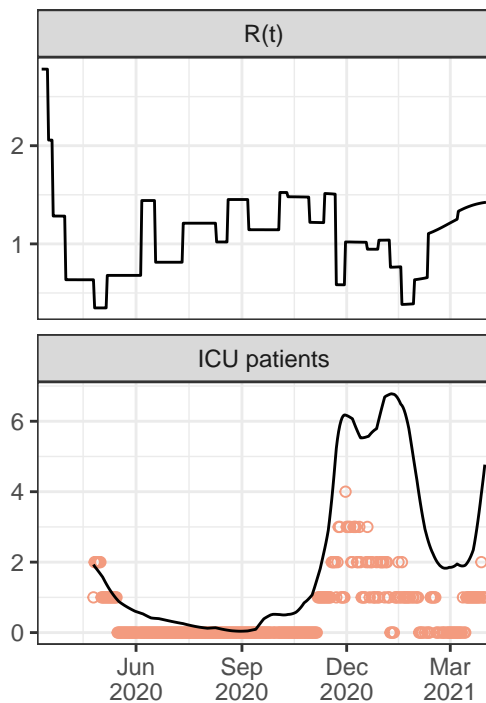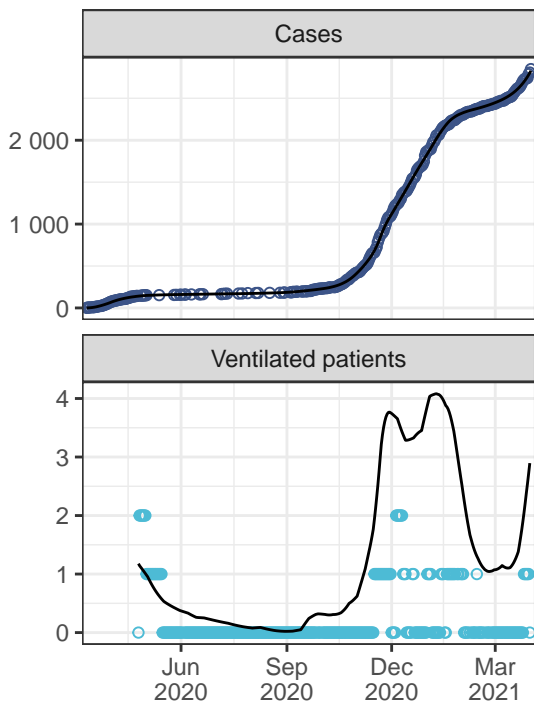

## LK Hameln–Pyrmont

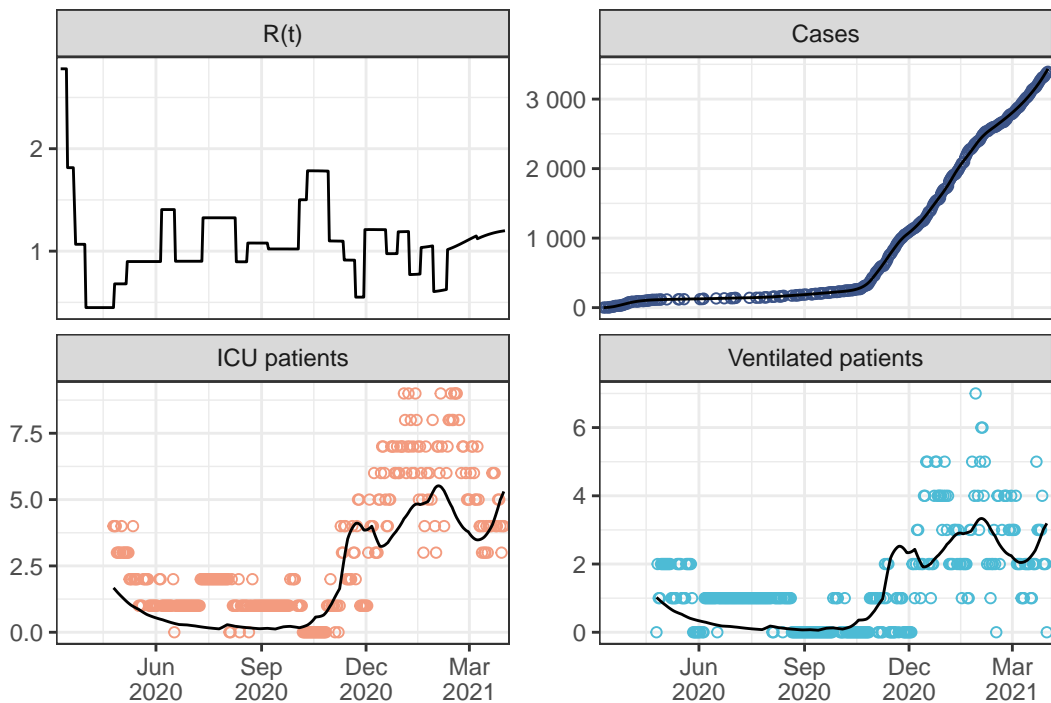

## LK Harburg

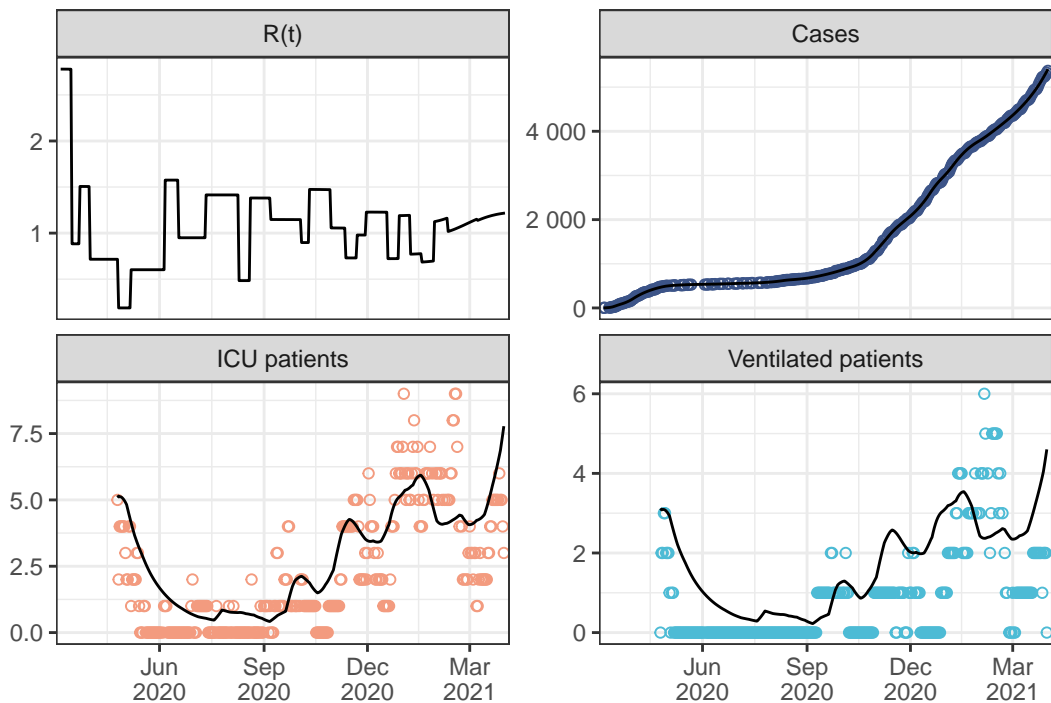

## LK Harz

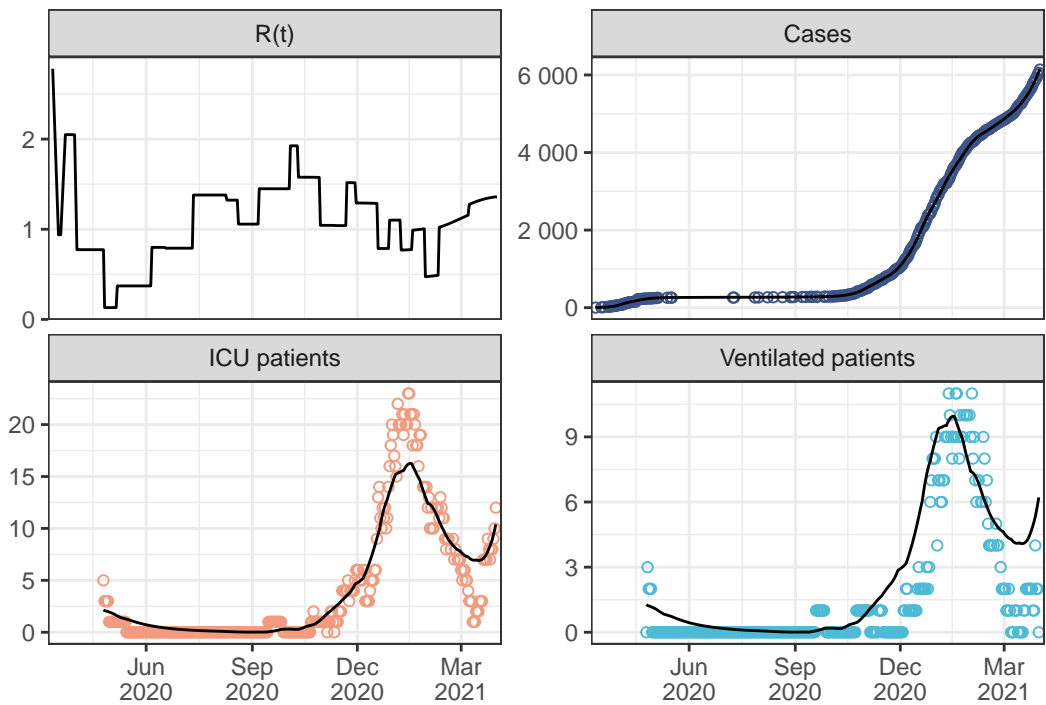

## LK Havelland

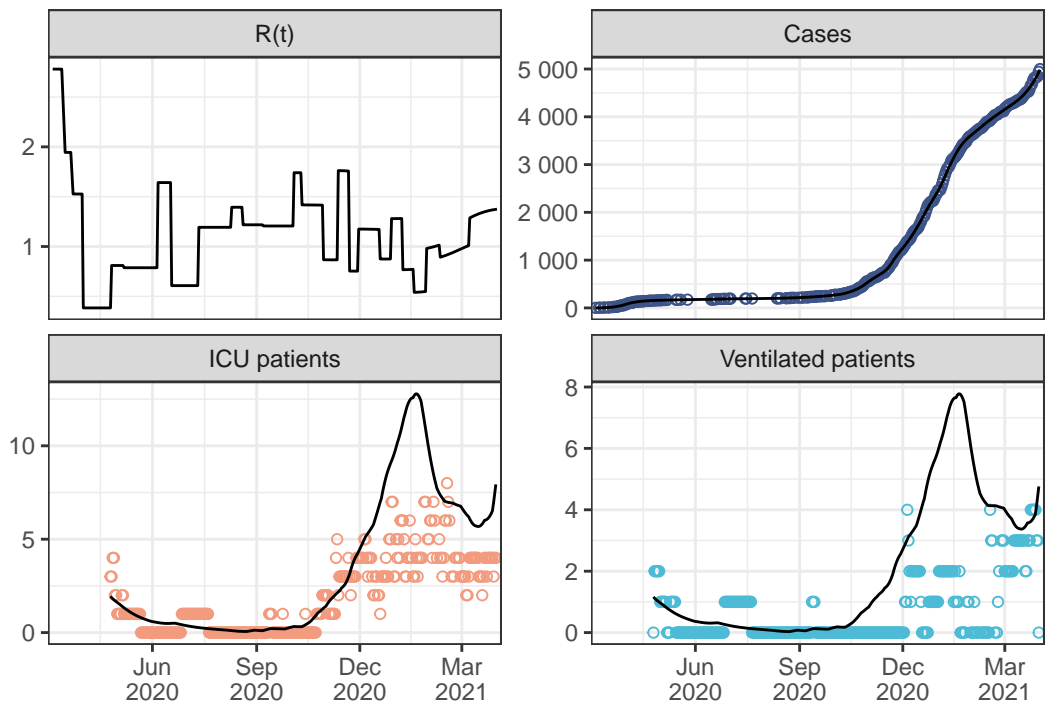

## LK Heidekreis

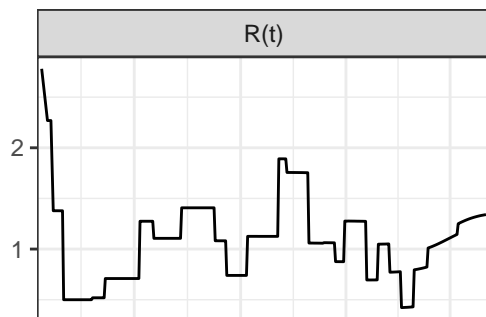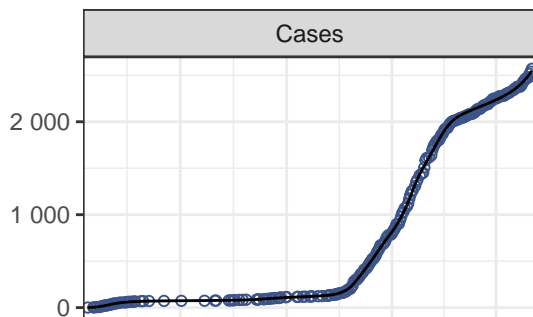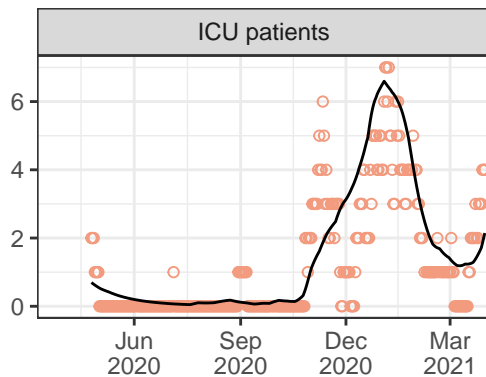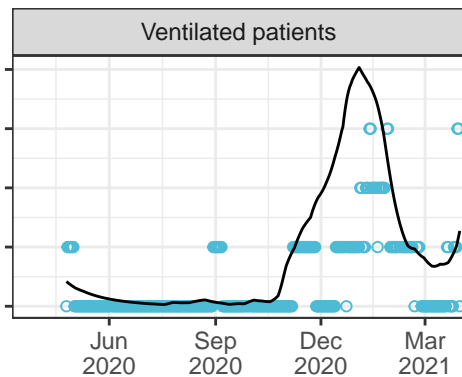

## LK Heidenheim

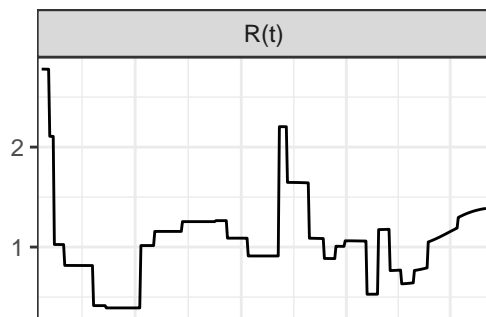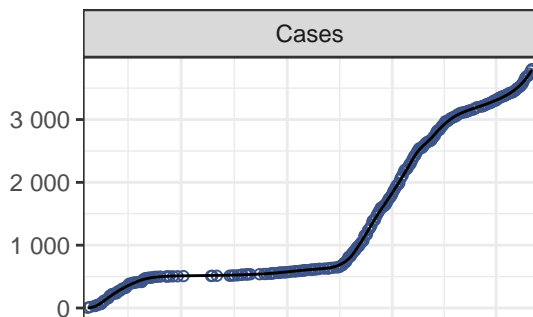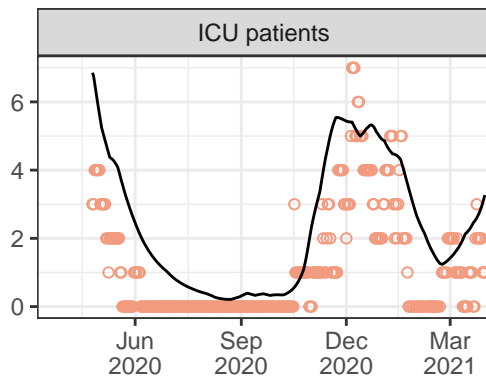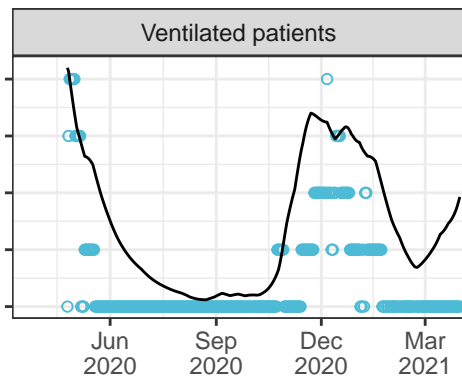

## LK Heilbronn

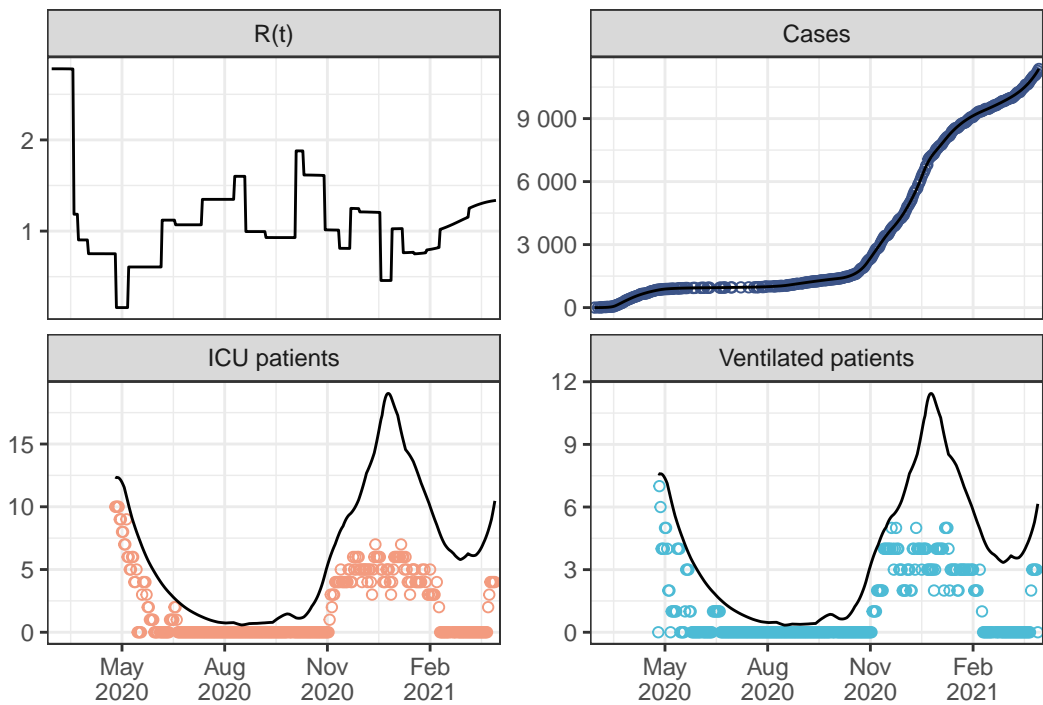

## LK Heinsberg

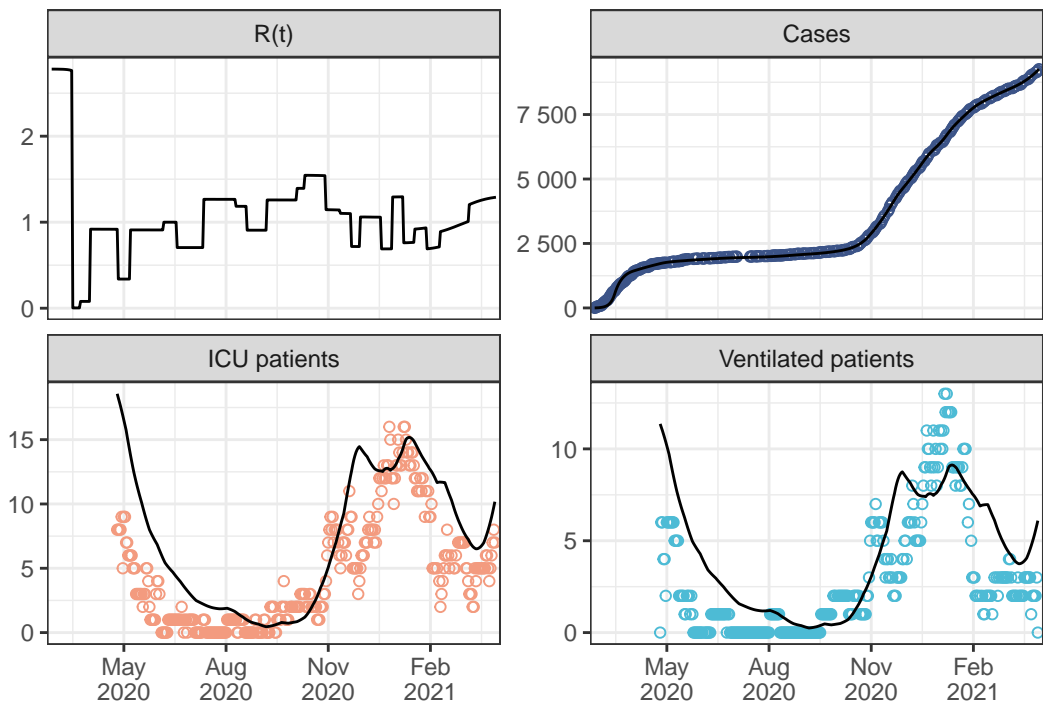

## LK Helmstedt

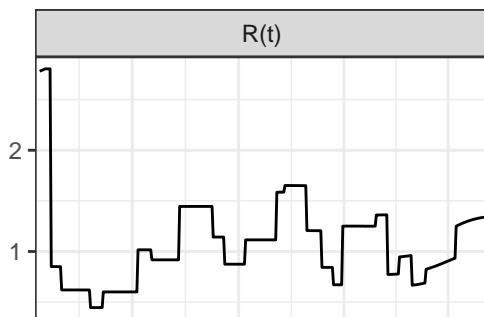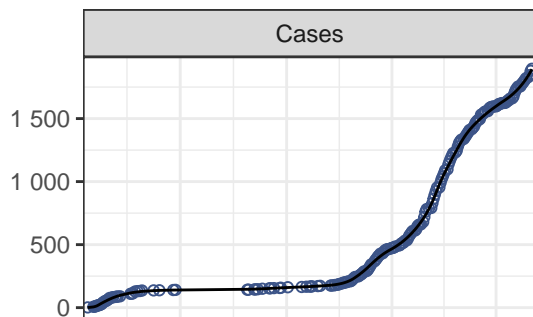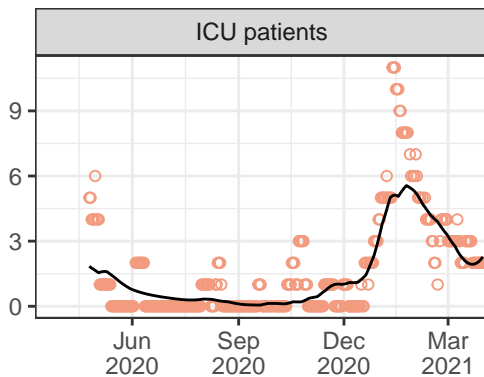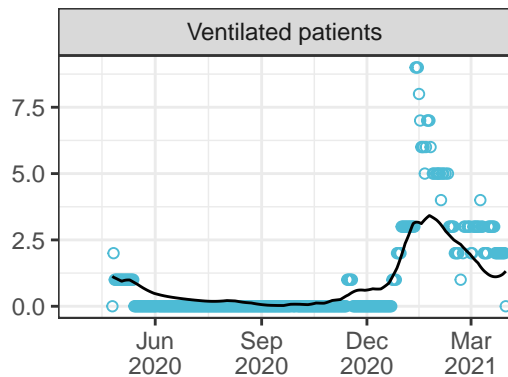

## LK Herford

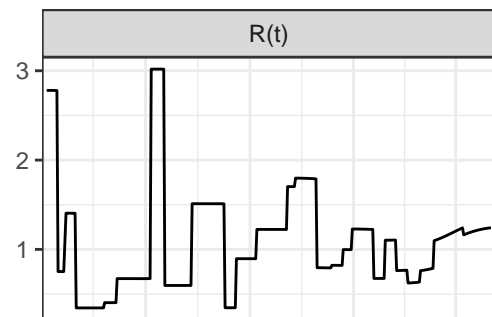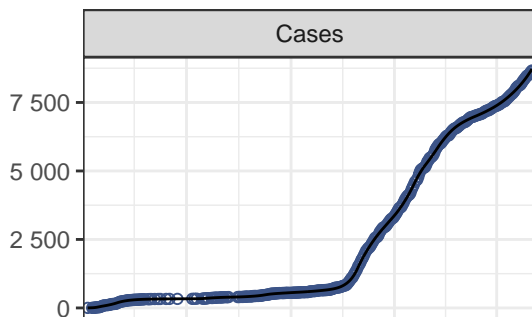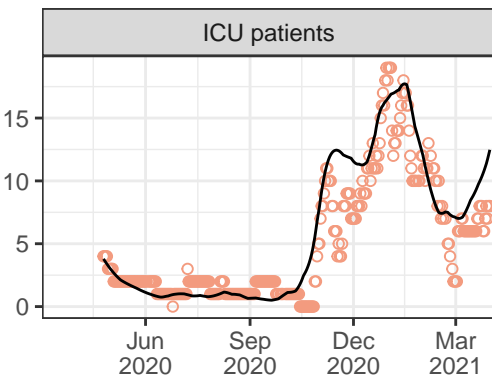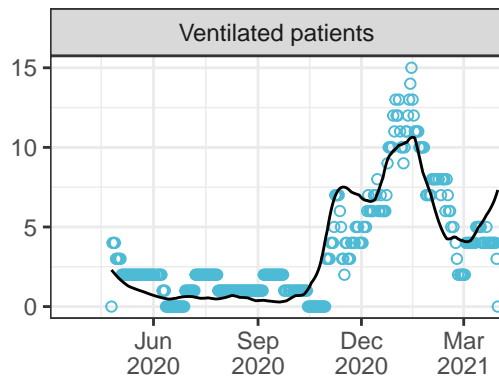

## LK Hersfeld–Rotenburg

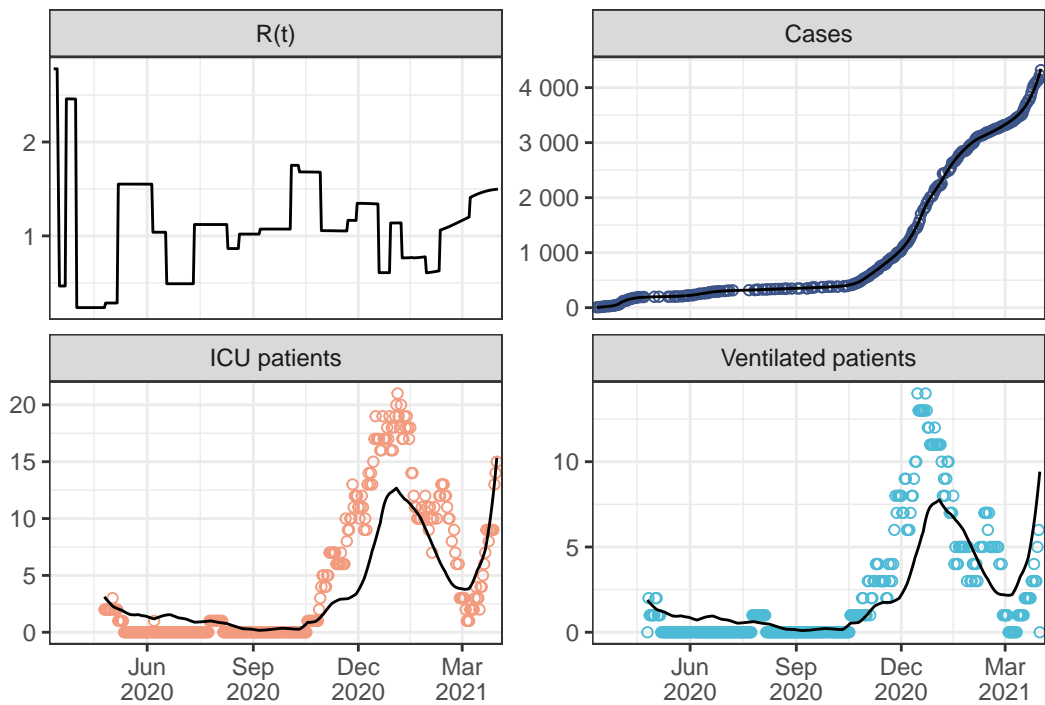

## LK Herzogtum Lauenburg

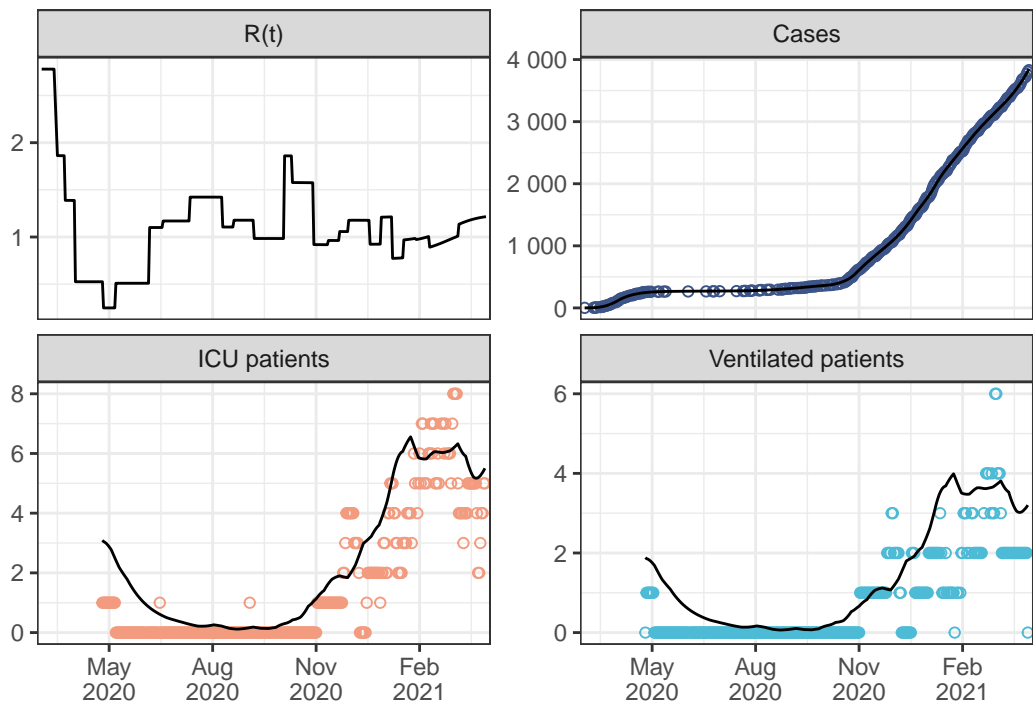

## LK Hildburghausen

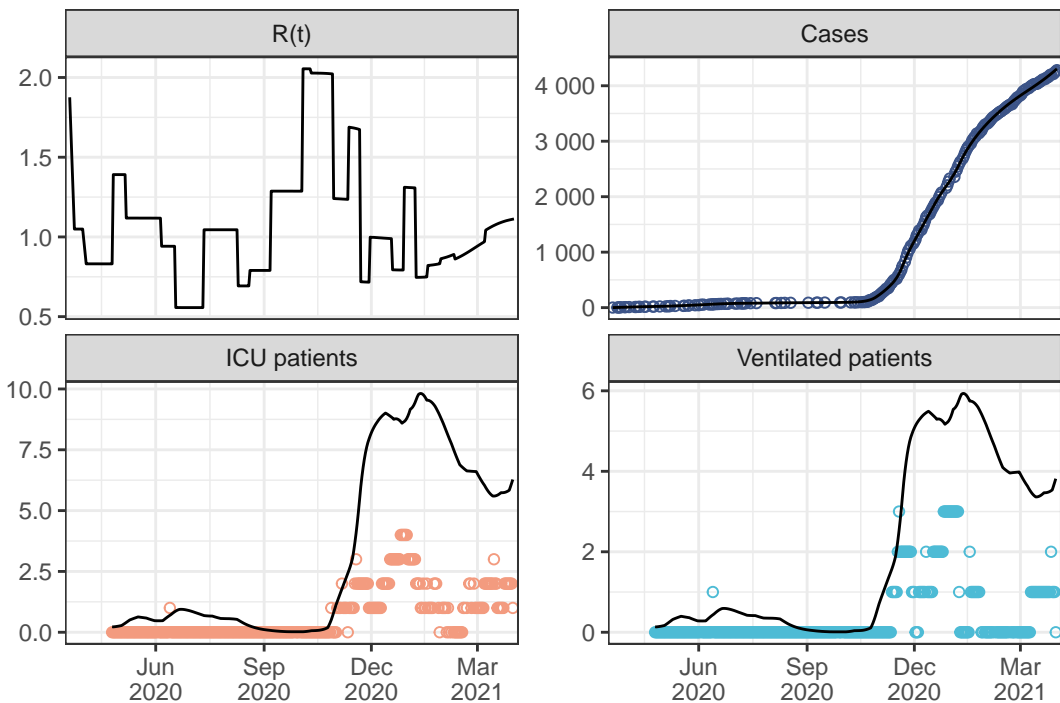

## LK Hildesheim

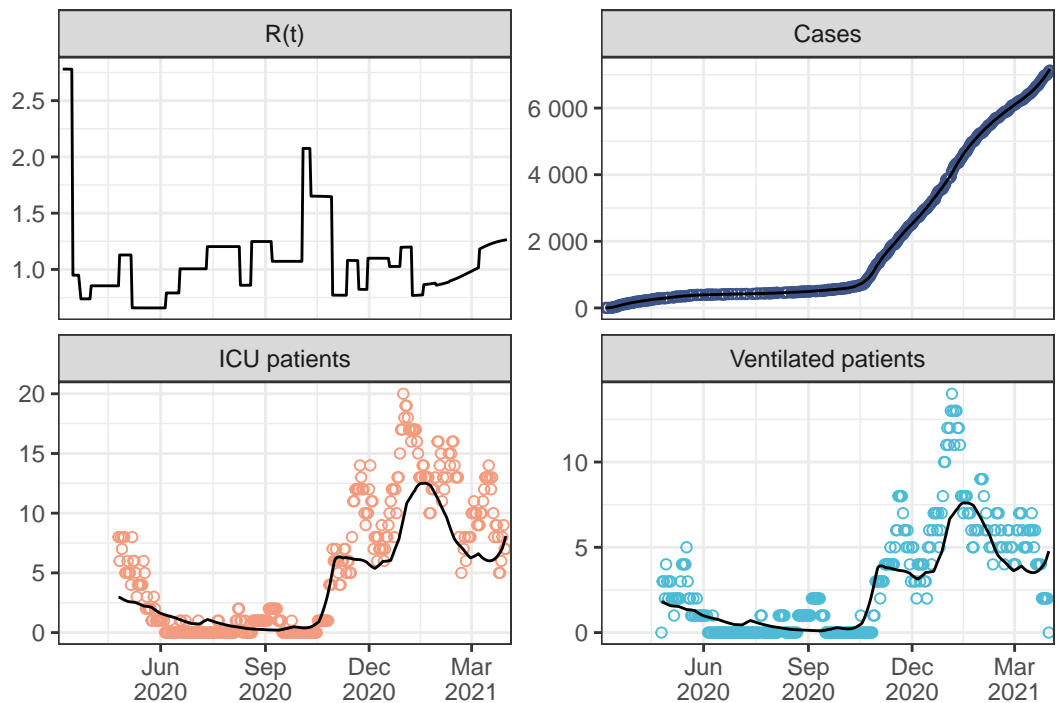

## LK Hochsauerlandkreis

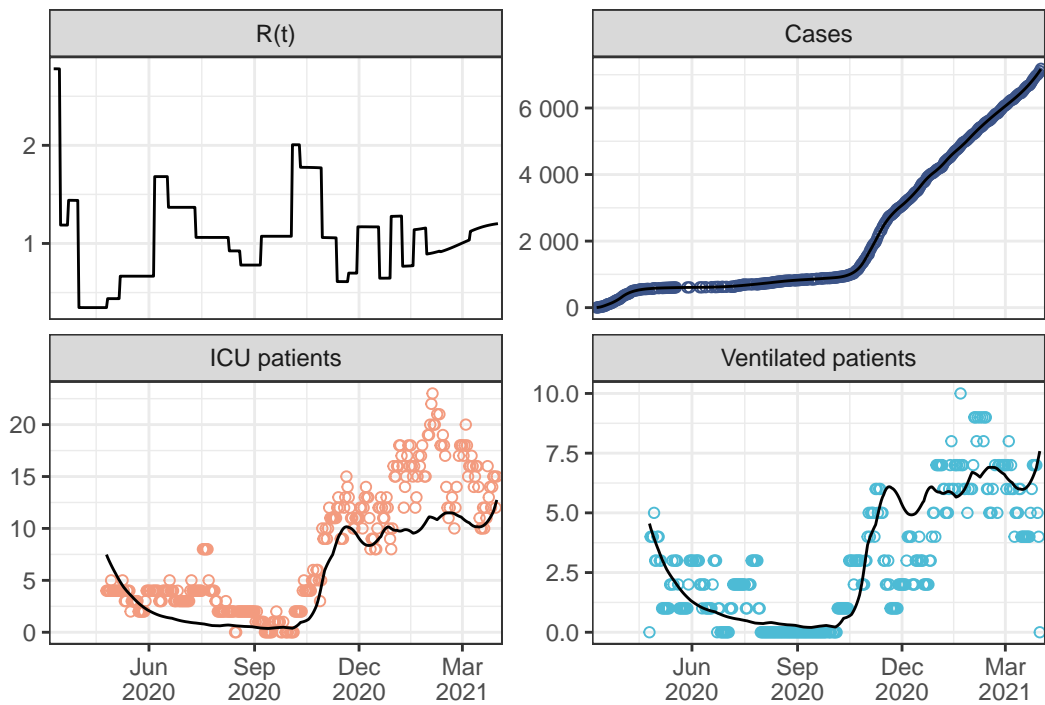

## LK Hochtaunuskreis

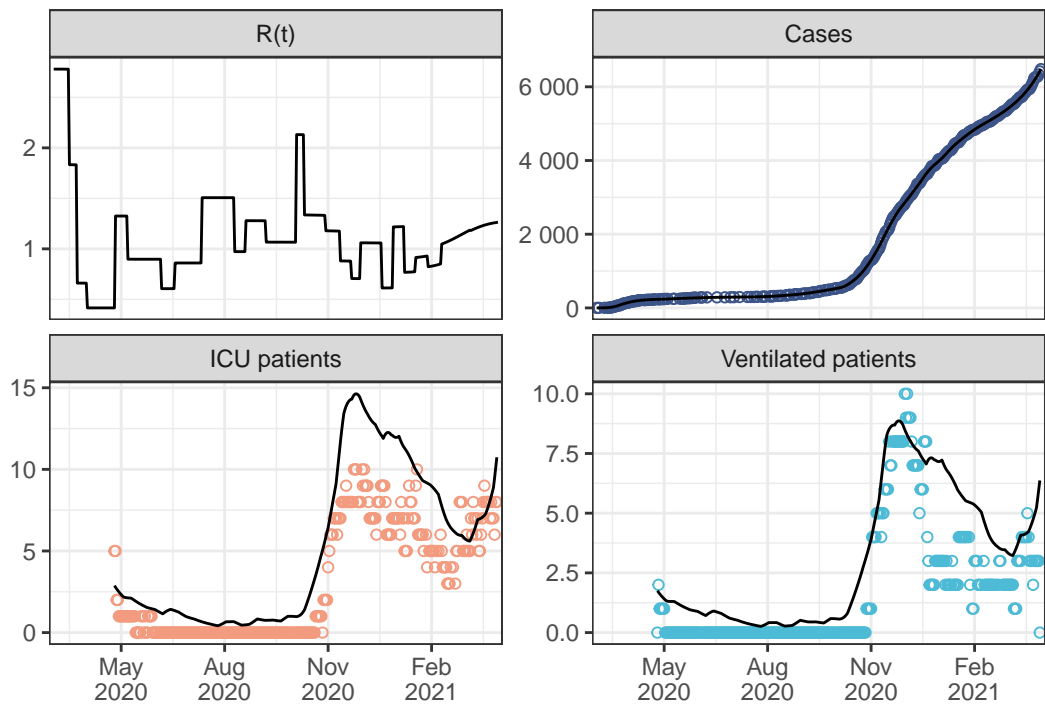

## LK Hof

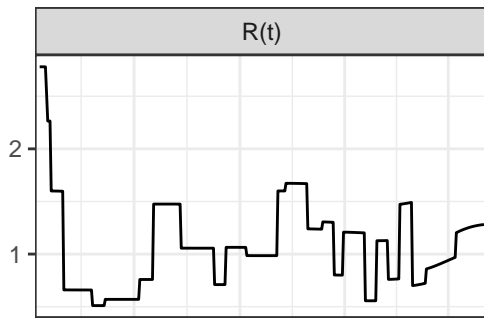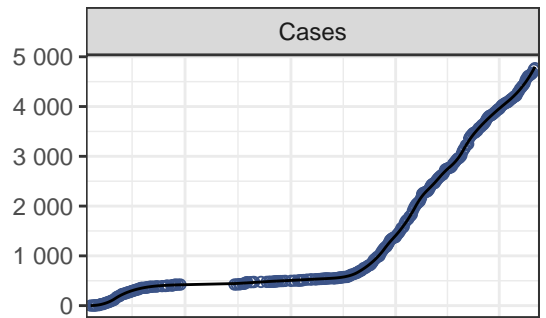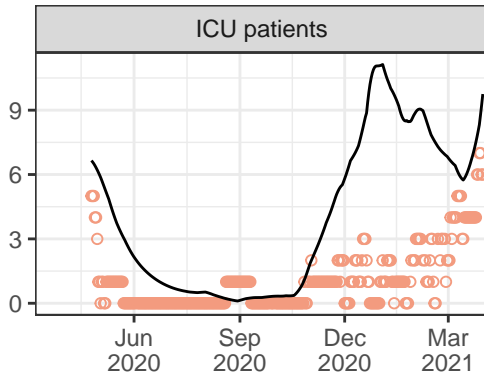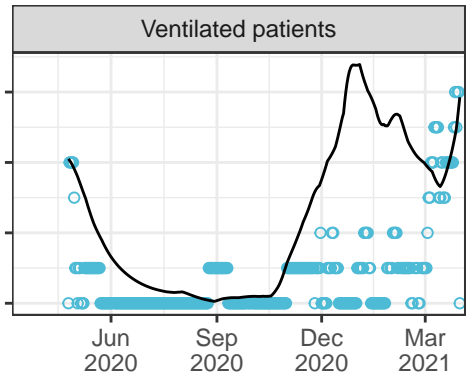

## LK Hohenlohekreis

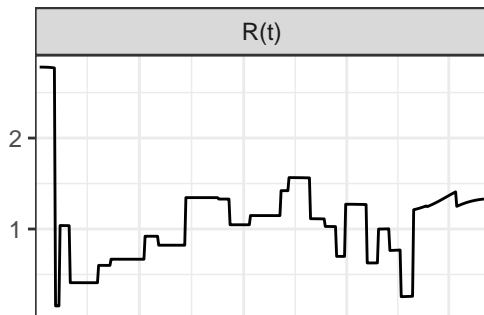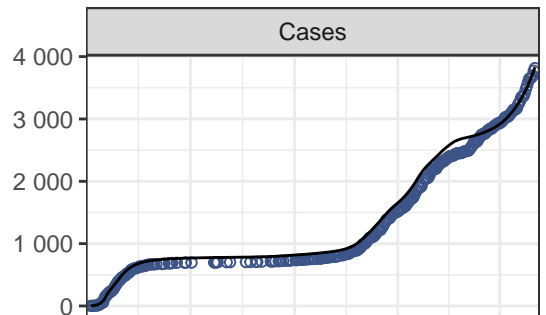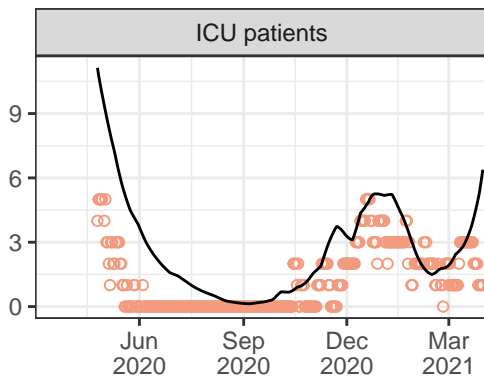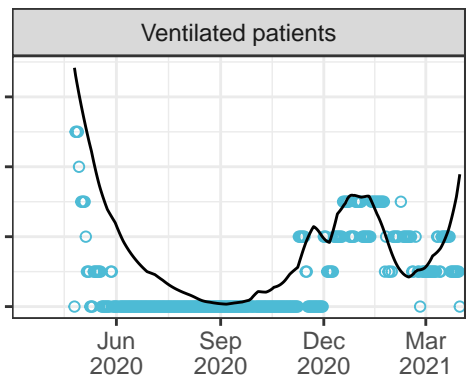

## LK Holzminden

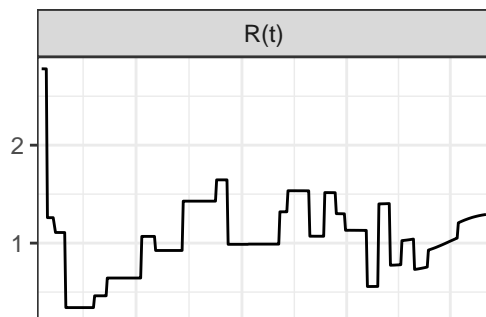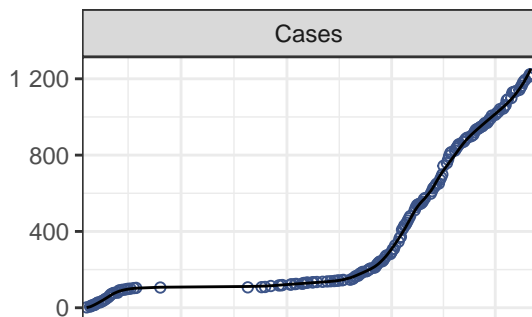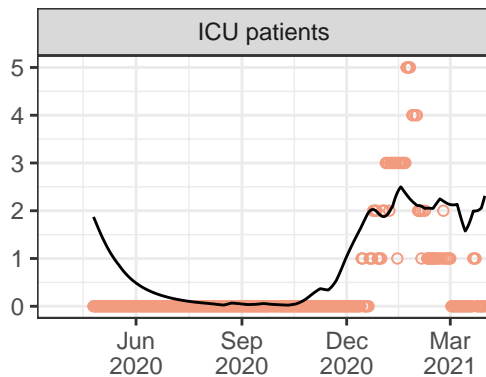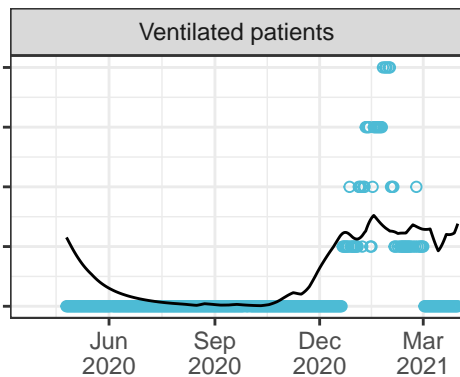

## LK Höxter

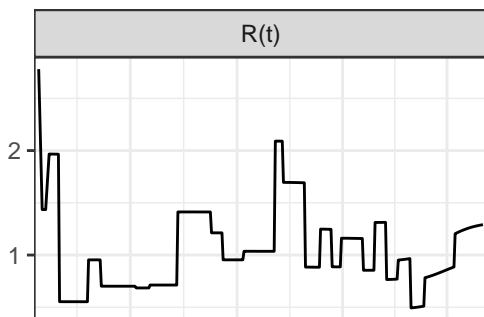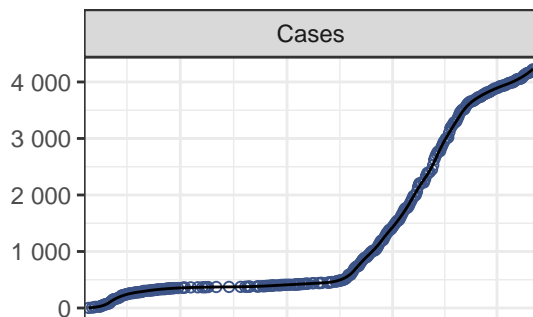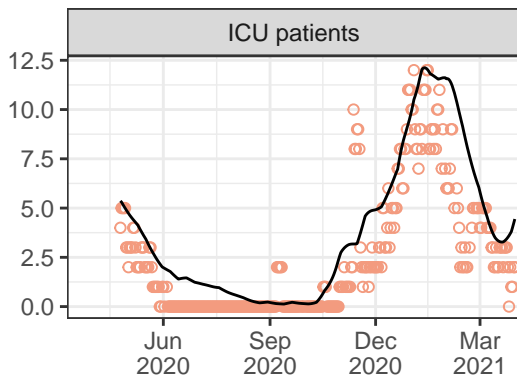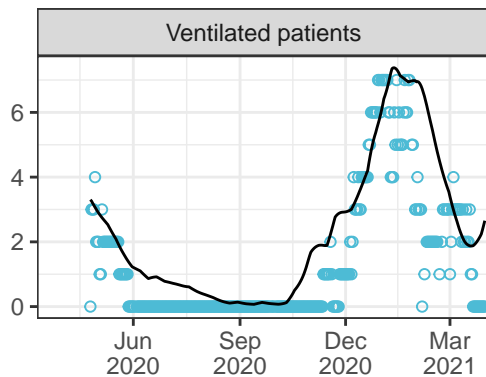

## LK Ilm-Kreis

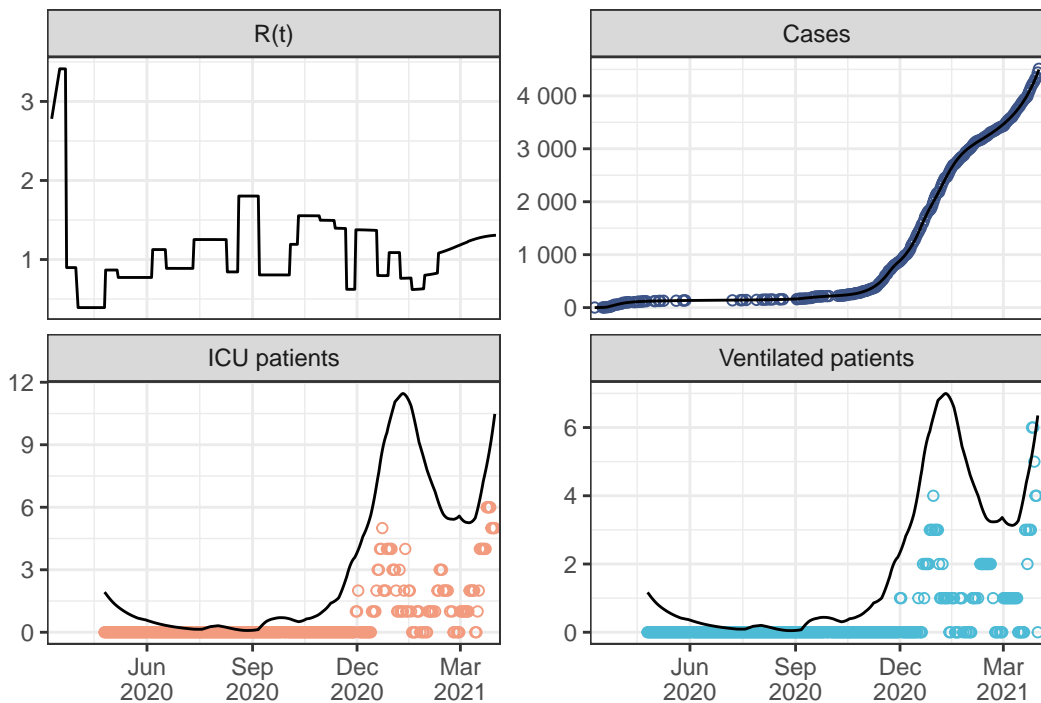

## LK Jerichower Land

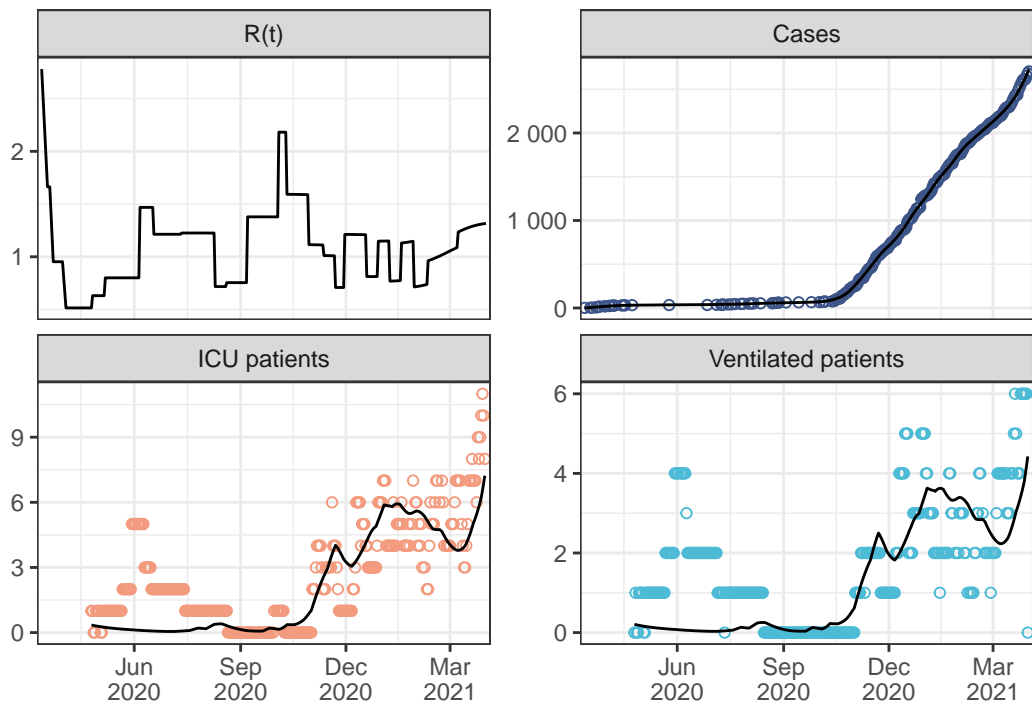

## LK Kaiserslautern

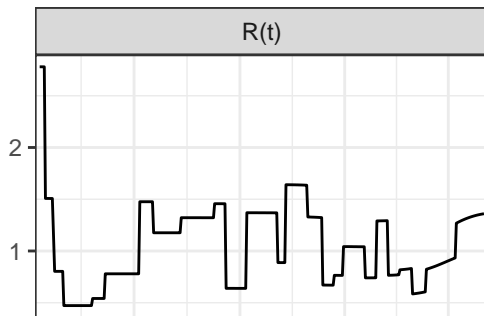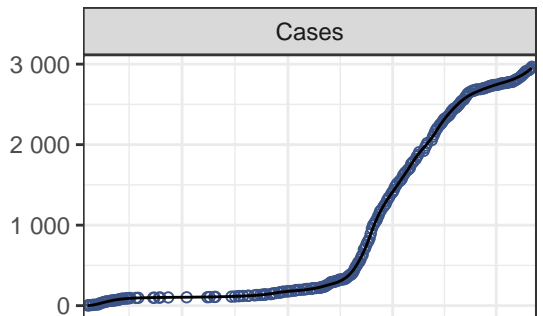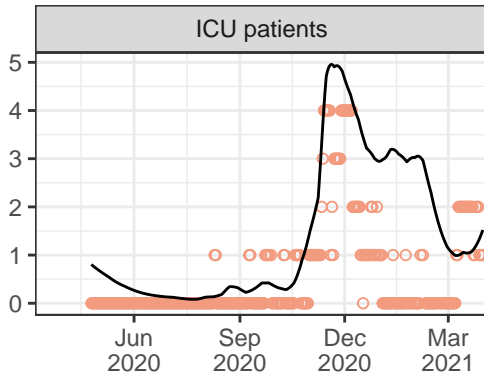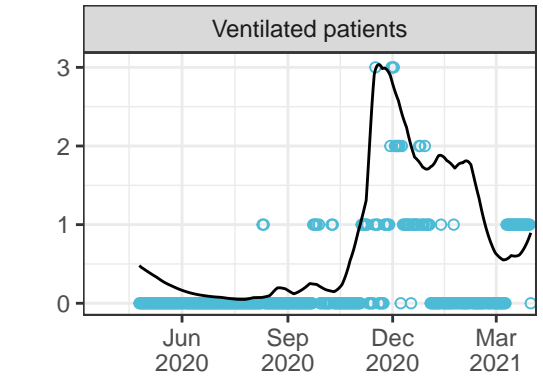

## LK Karlsruhe

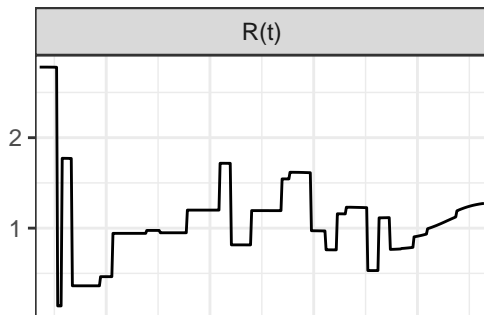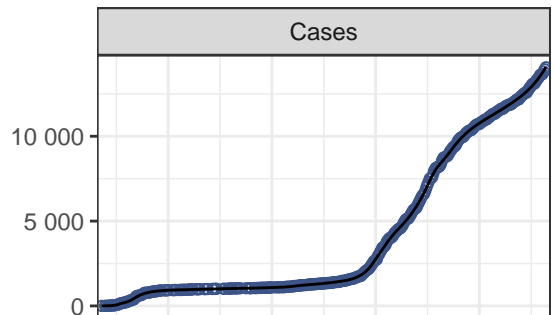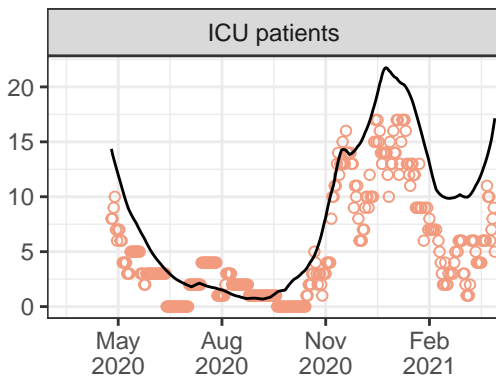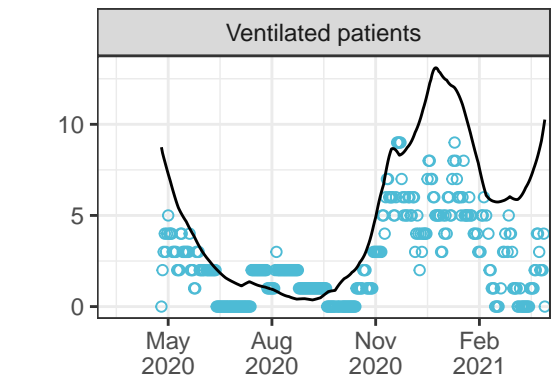

## LK Kassel

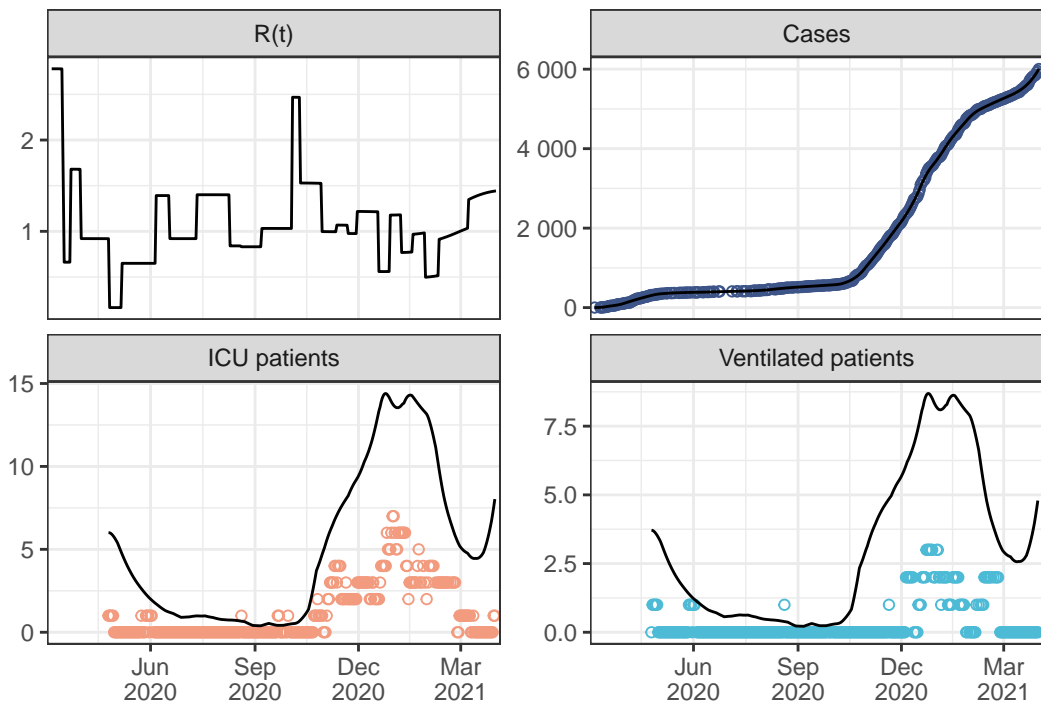

## LK Kelheim

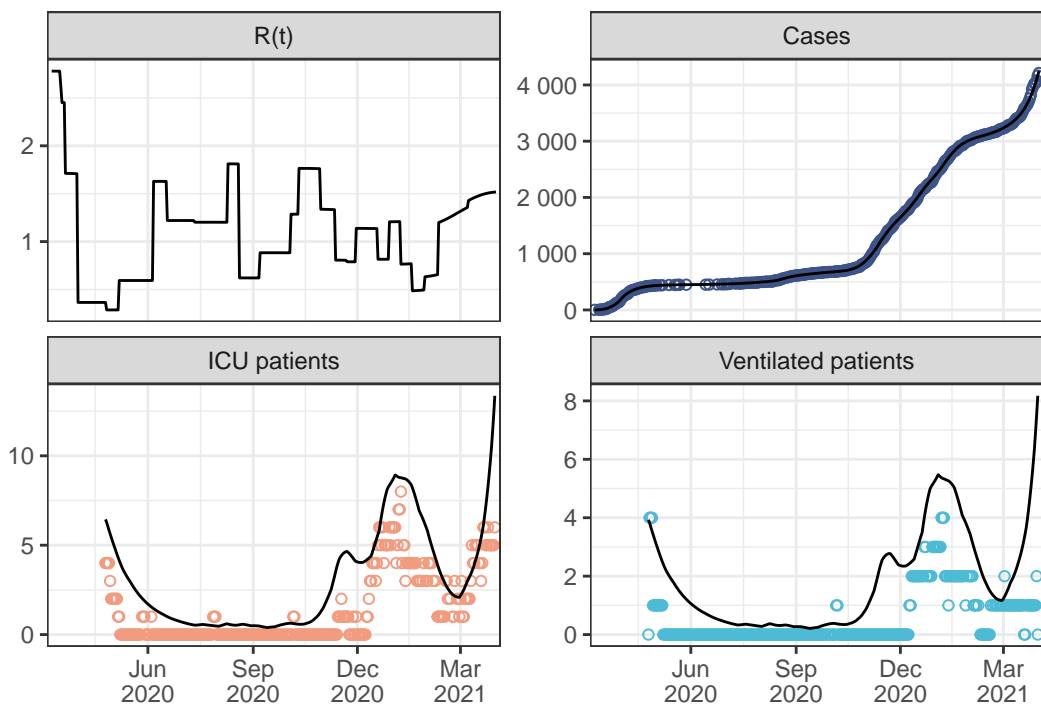

## LK Kitzingen

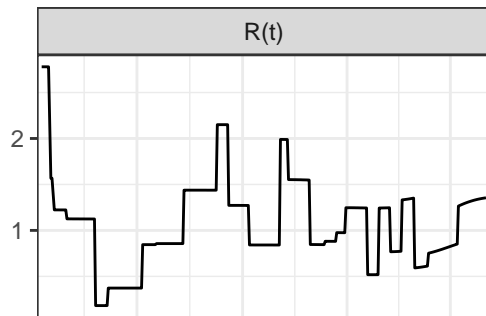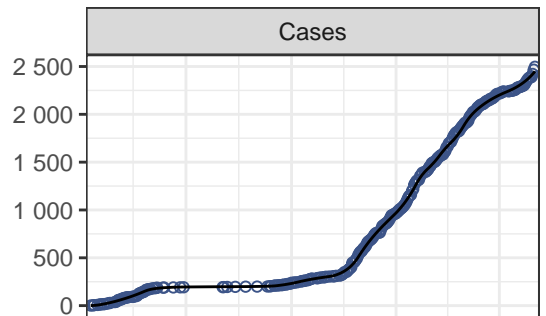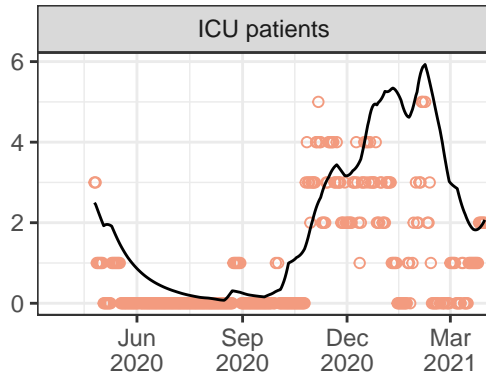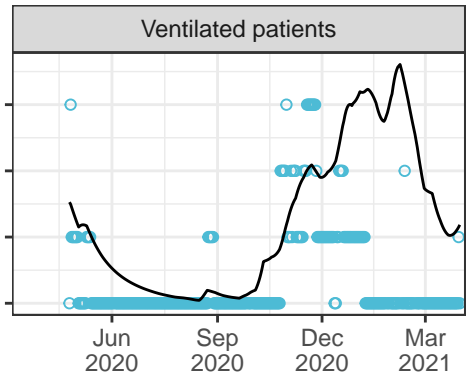

## LK Kleve

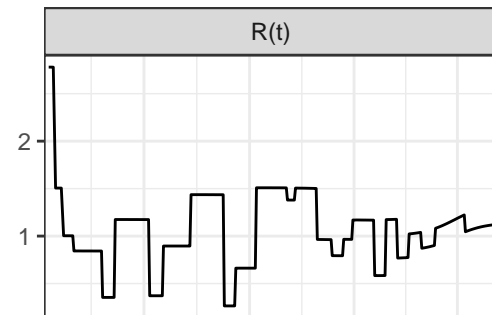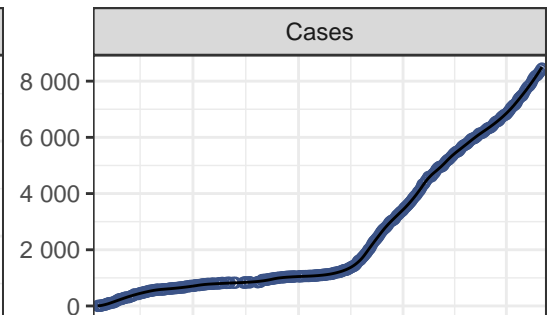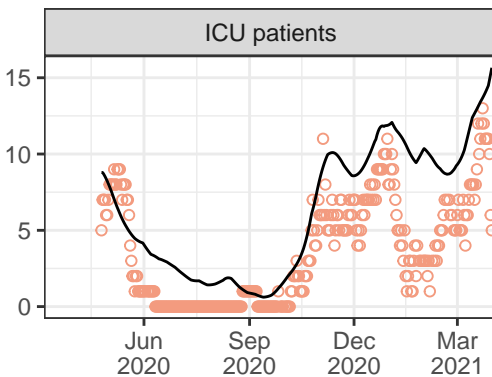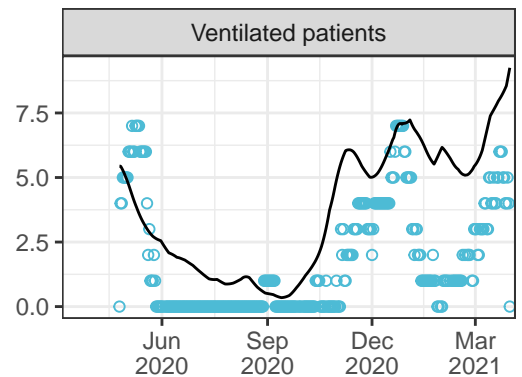

## LK Konstanz

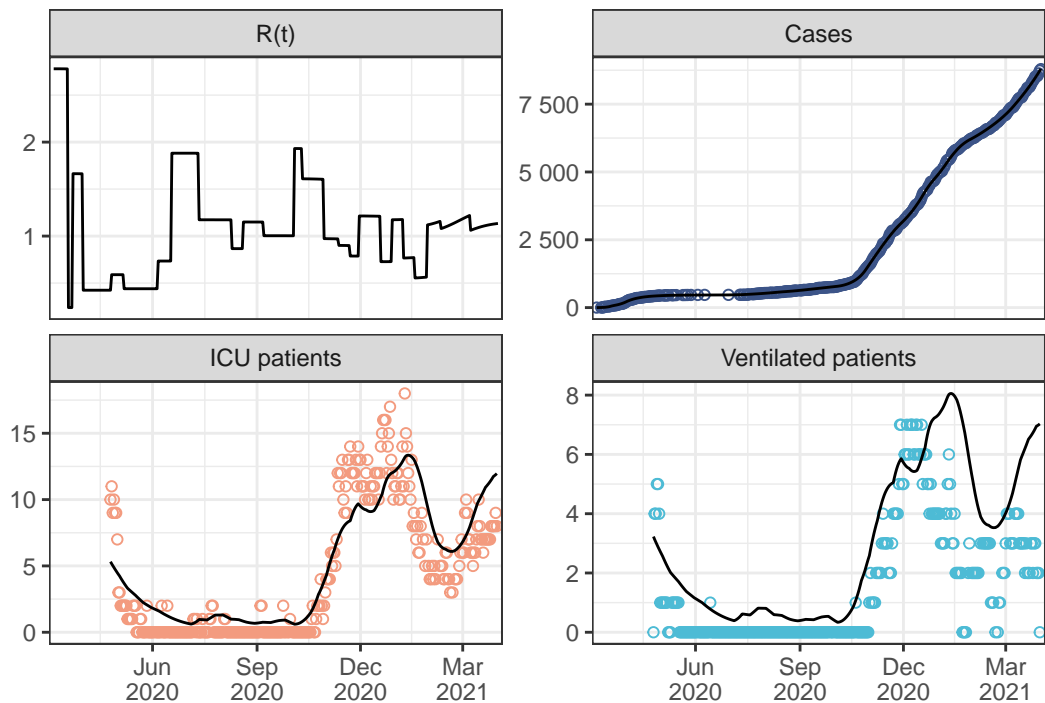

## LK Kronach

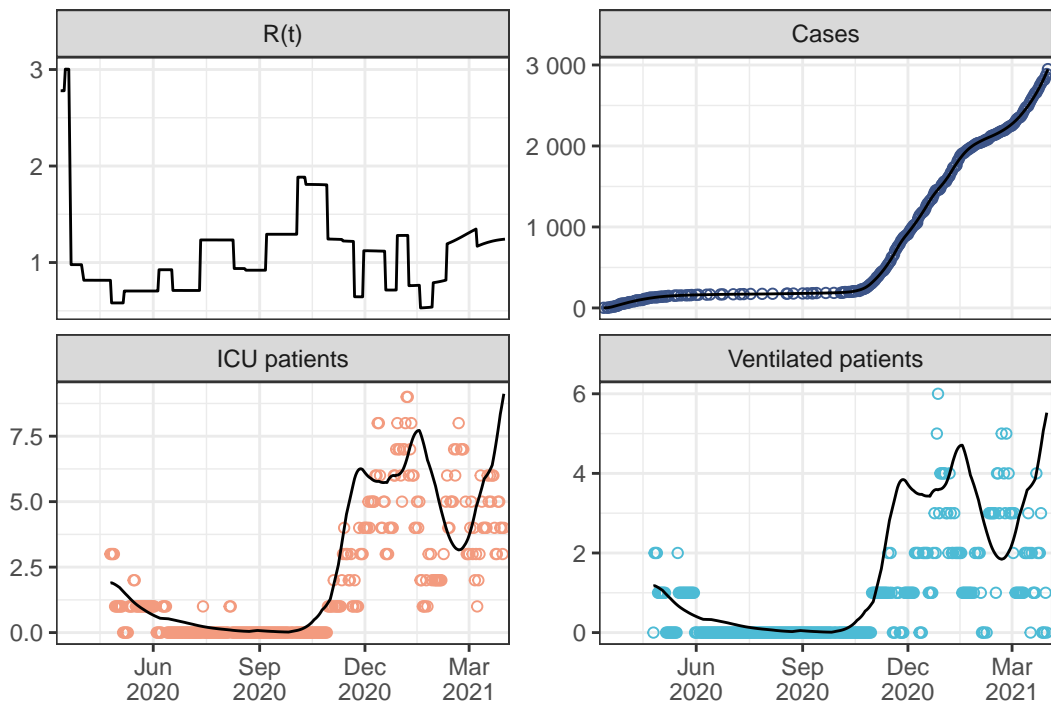

## LK Kulmbach

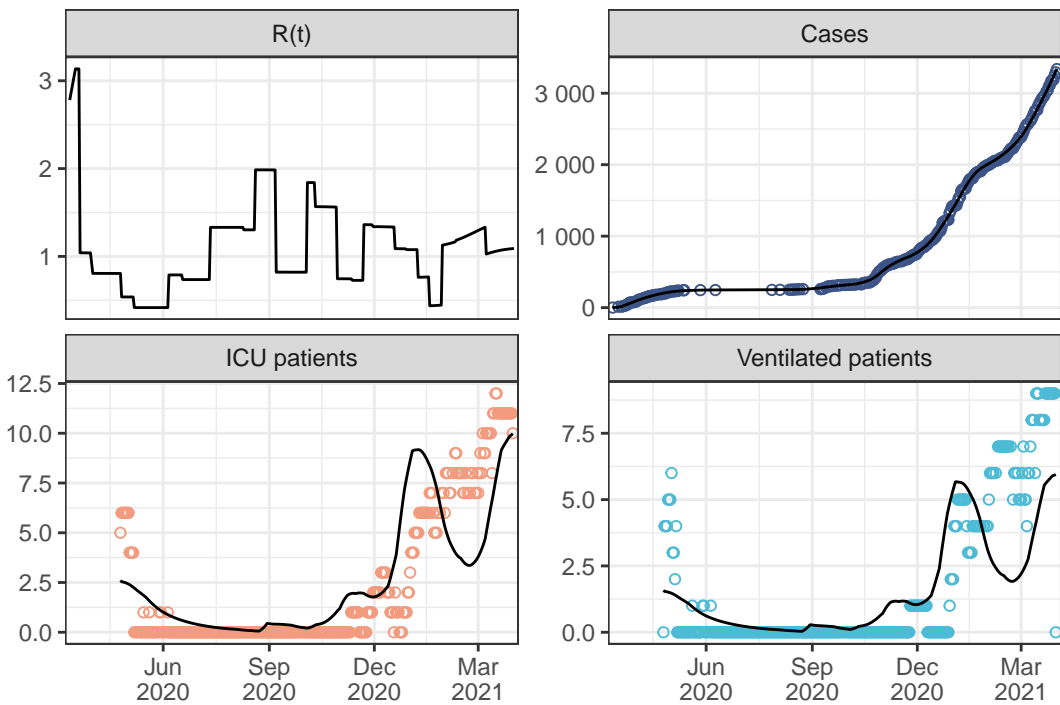

## LK Kusel

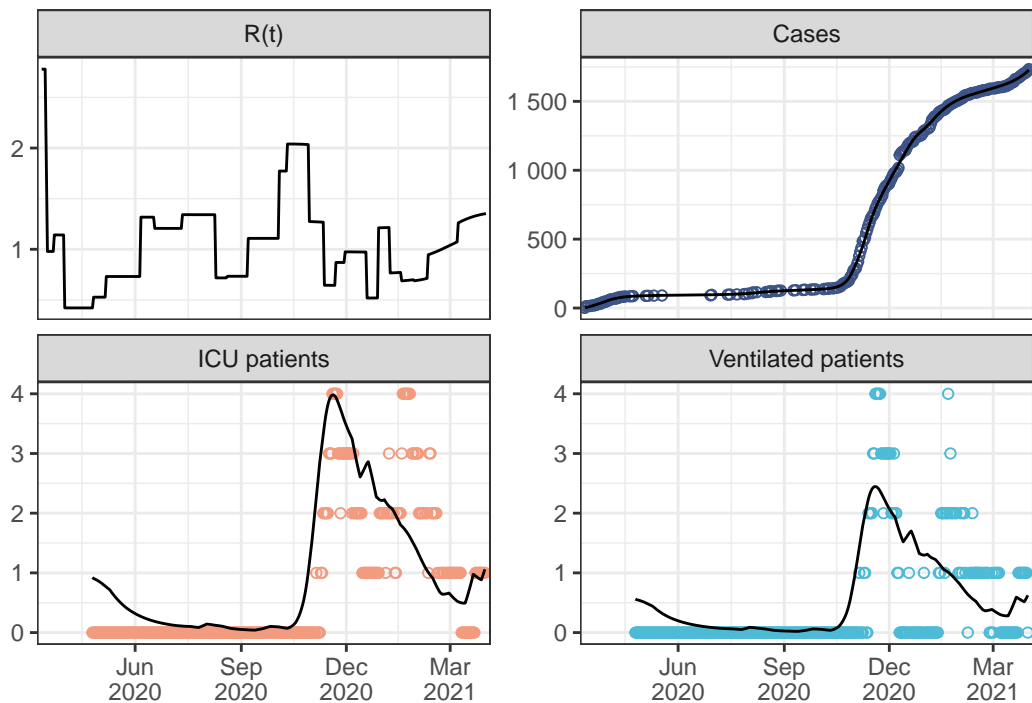

## LK Kyffhäuserkreis

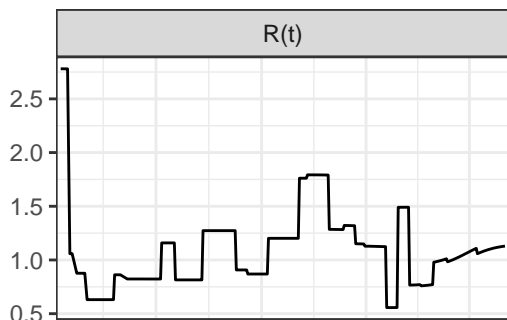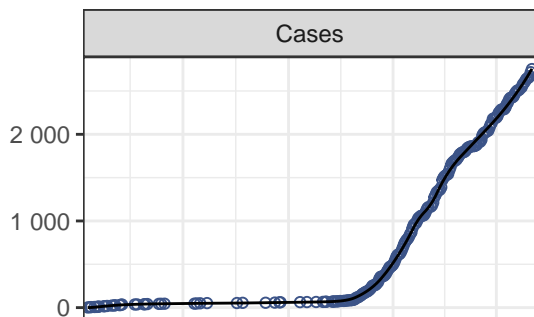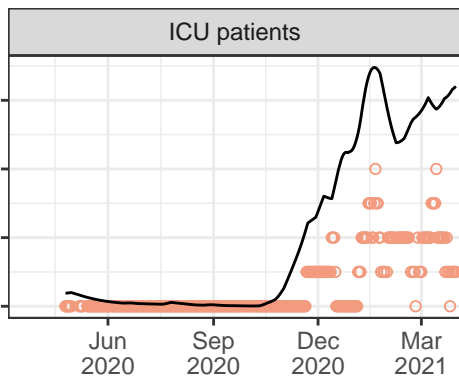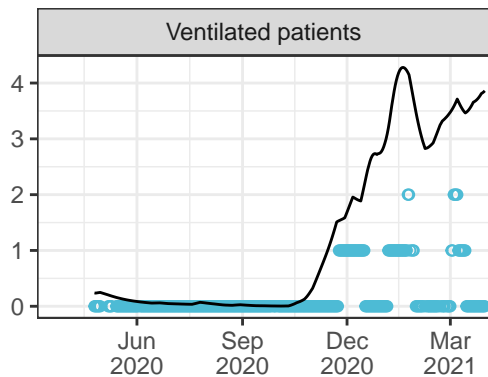

## LK Lahn-Dill-Kreis

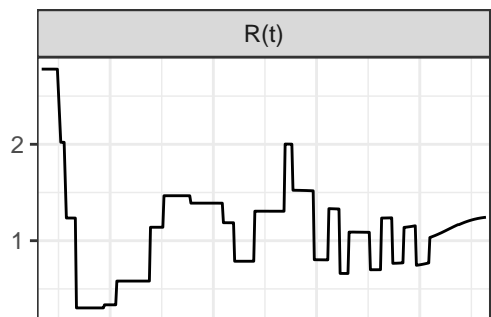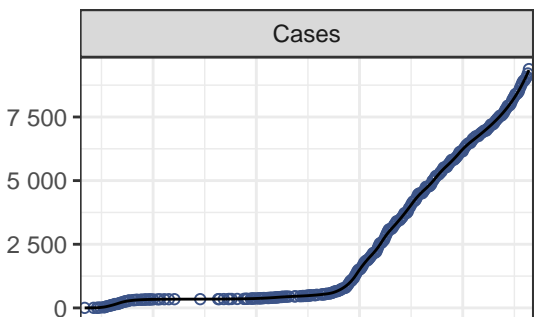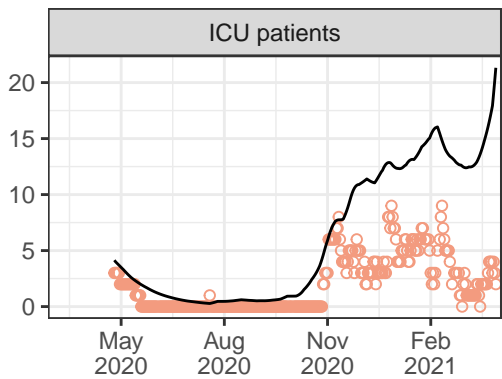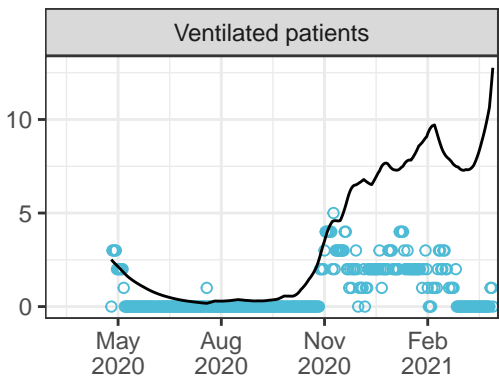

## LK Landsberg a. Lech

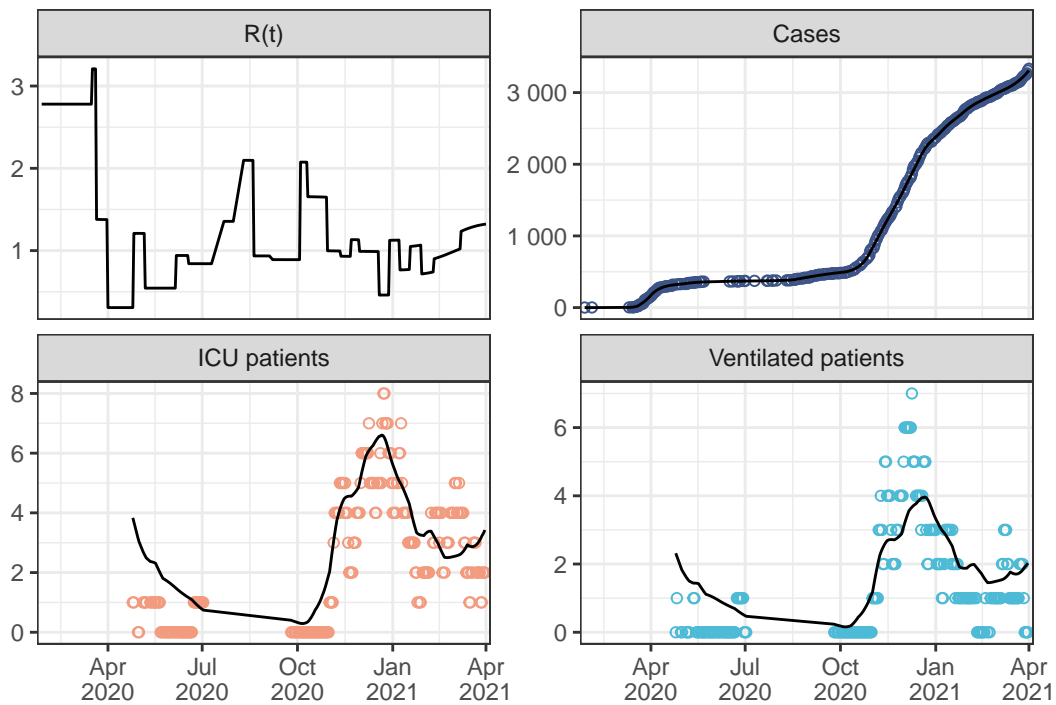

## LK Landshut

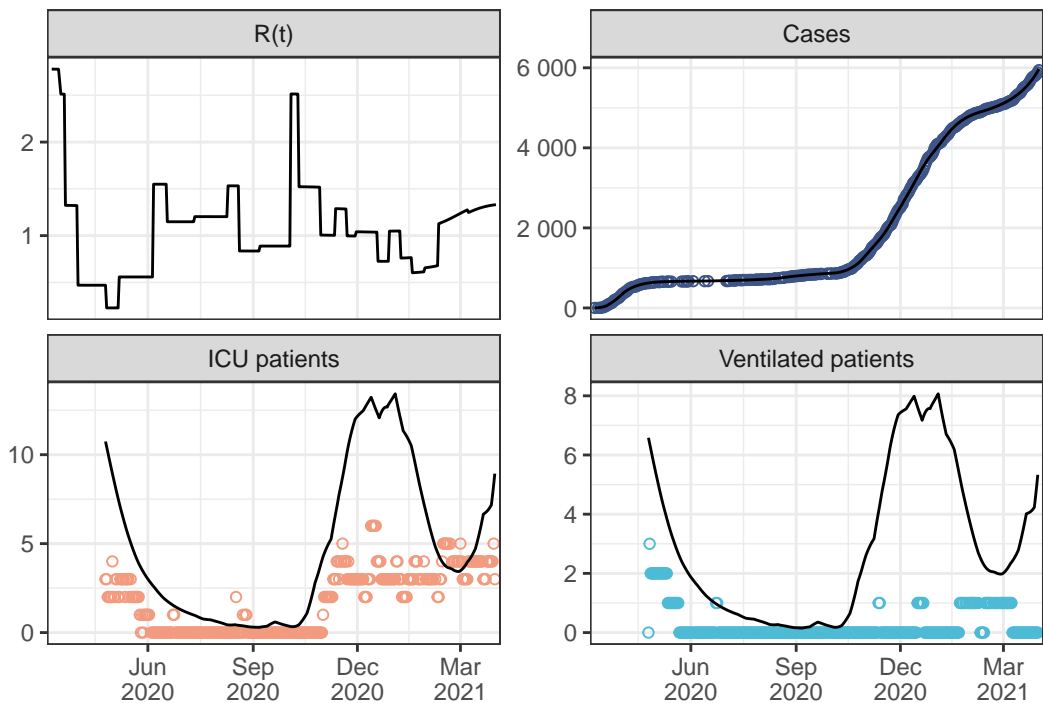

## LK Leer

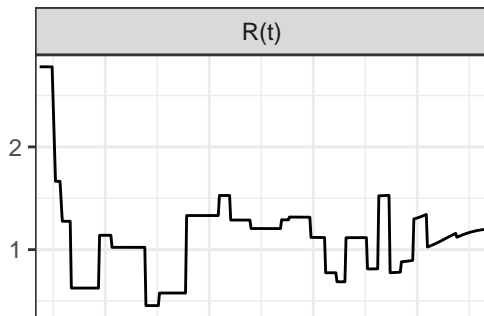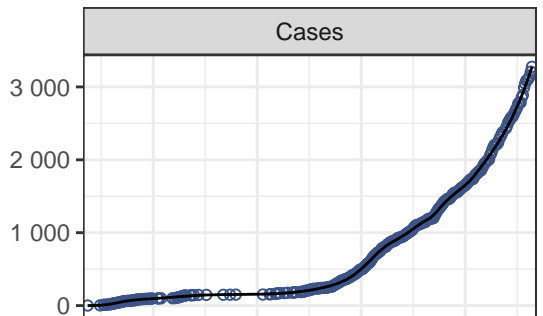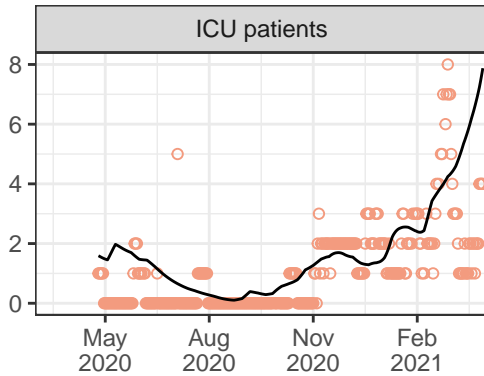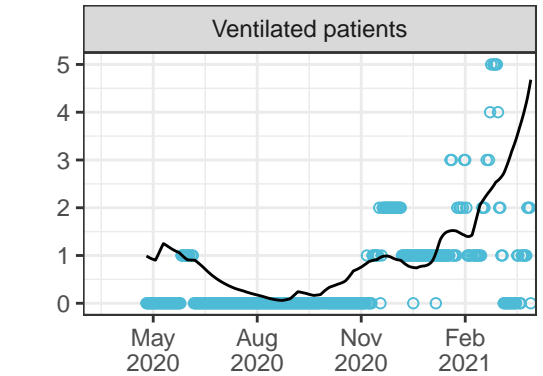

## LK Leipzig

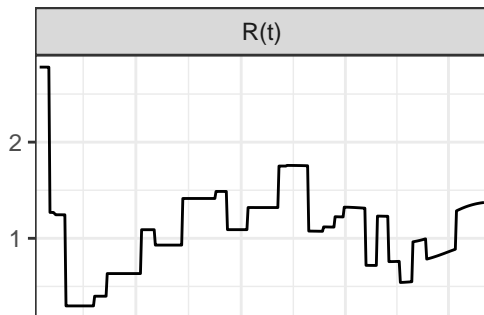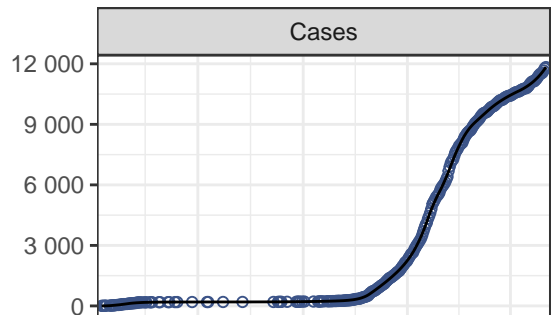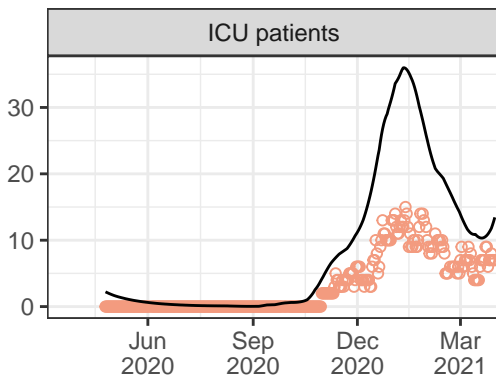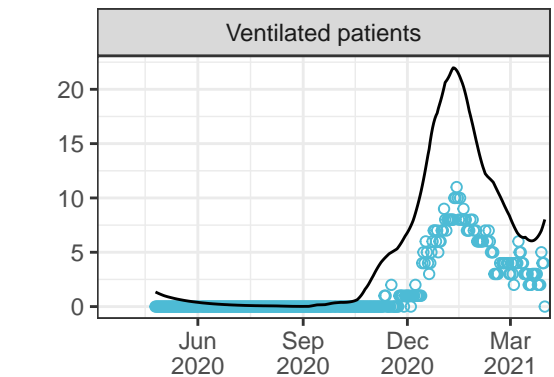

## LK Lichtenfels

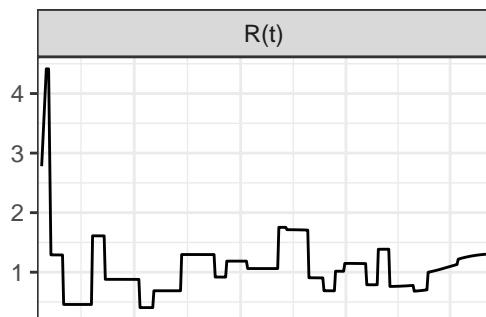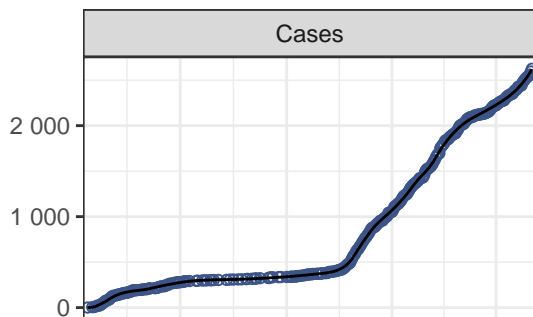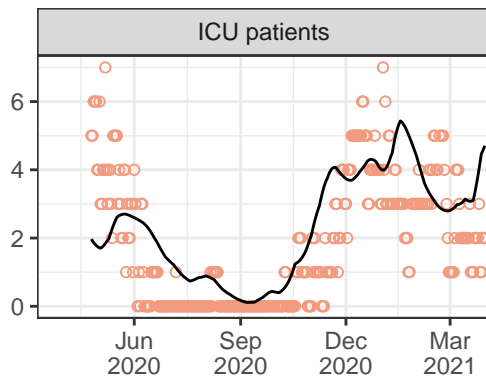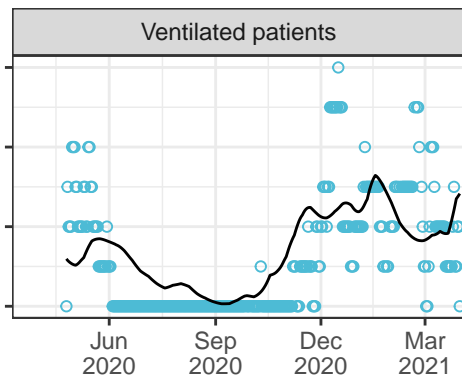

## LK Limburg-Weilburg

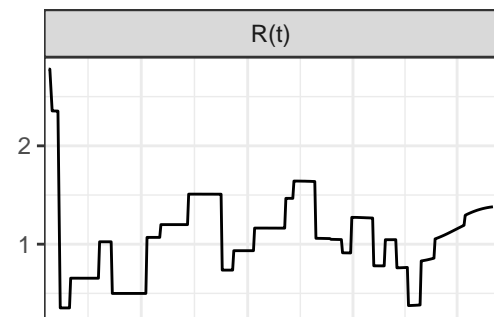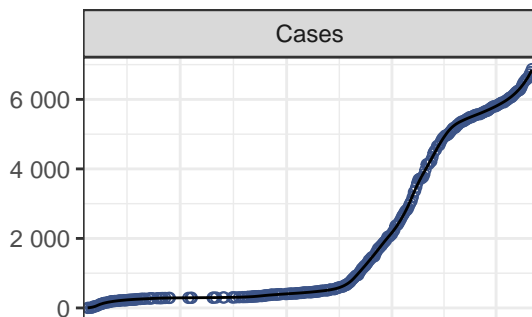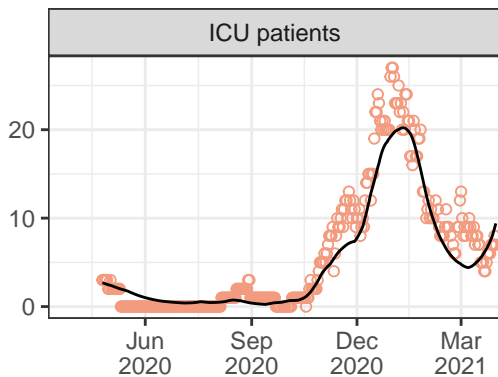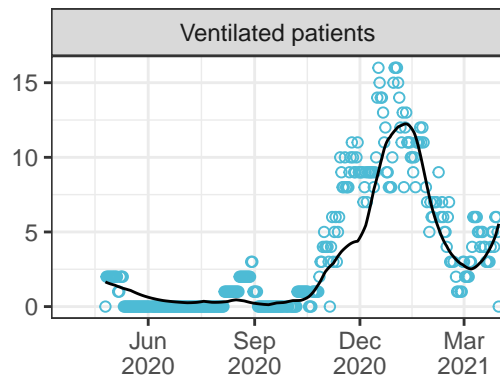

## LK Lindau

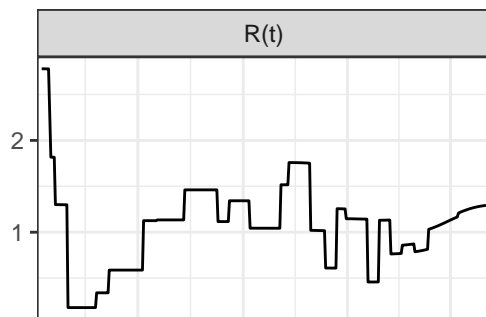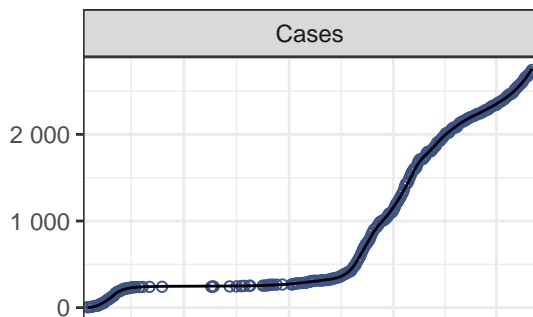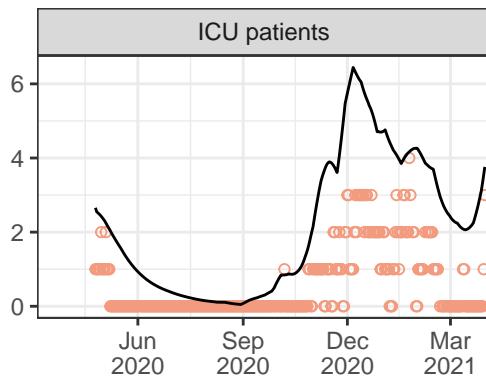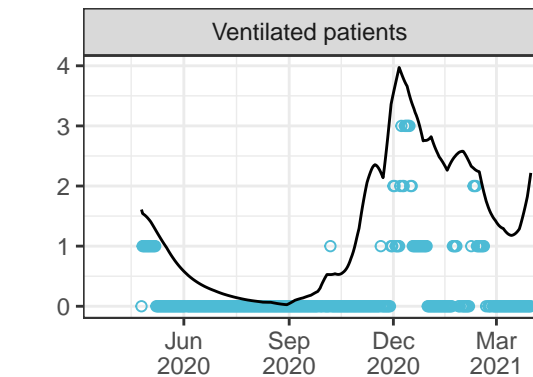

## LK Lippe

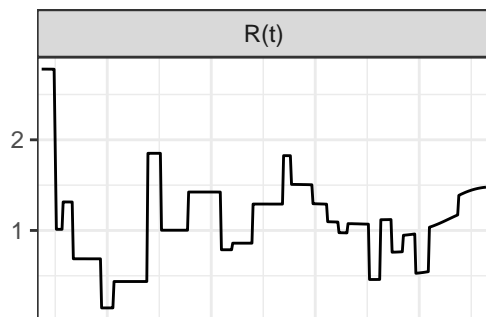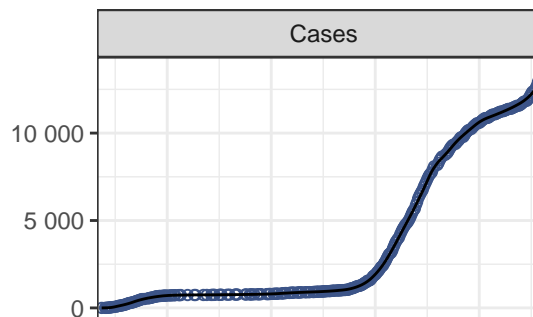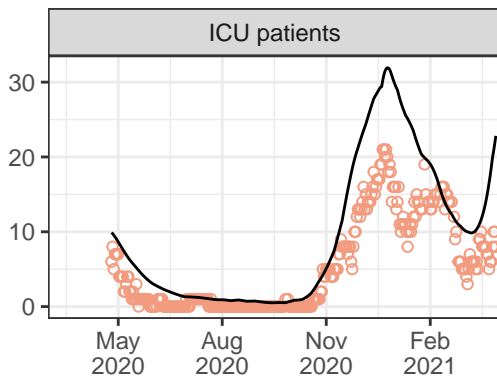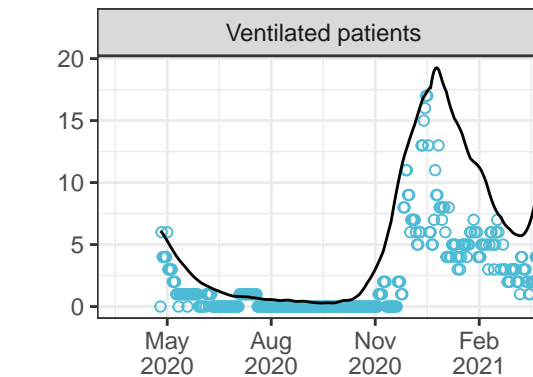

## LK Lörrach

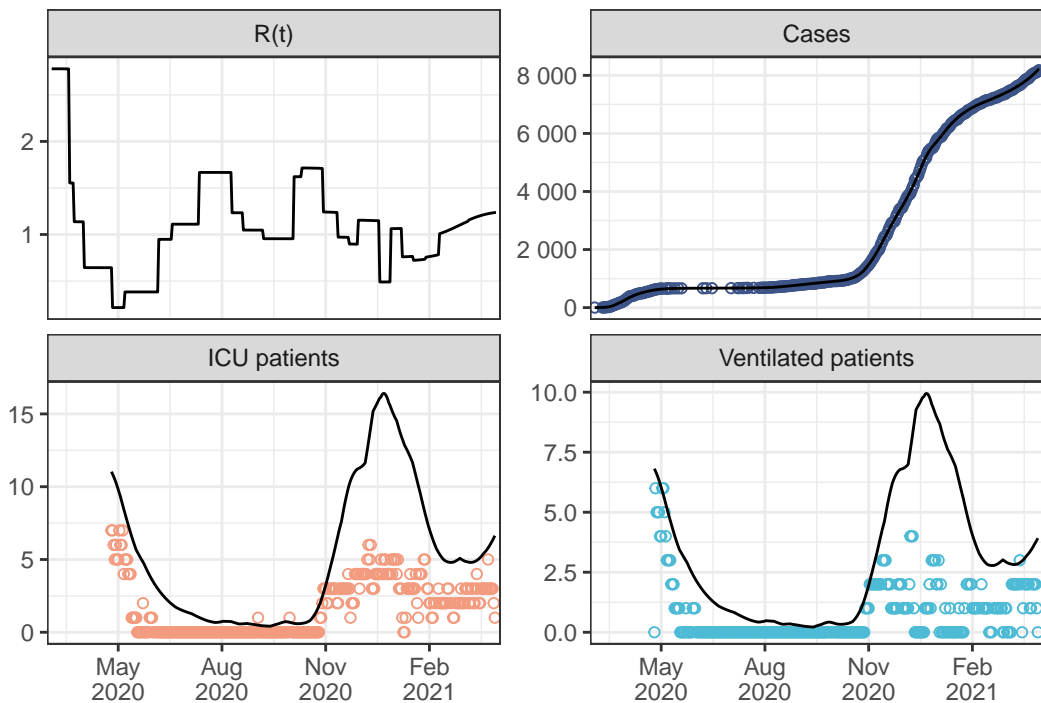

## LK Lüchow–Dannenberg

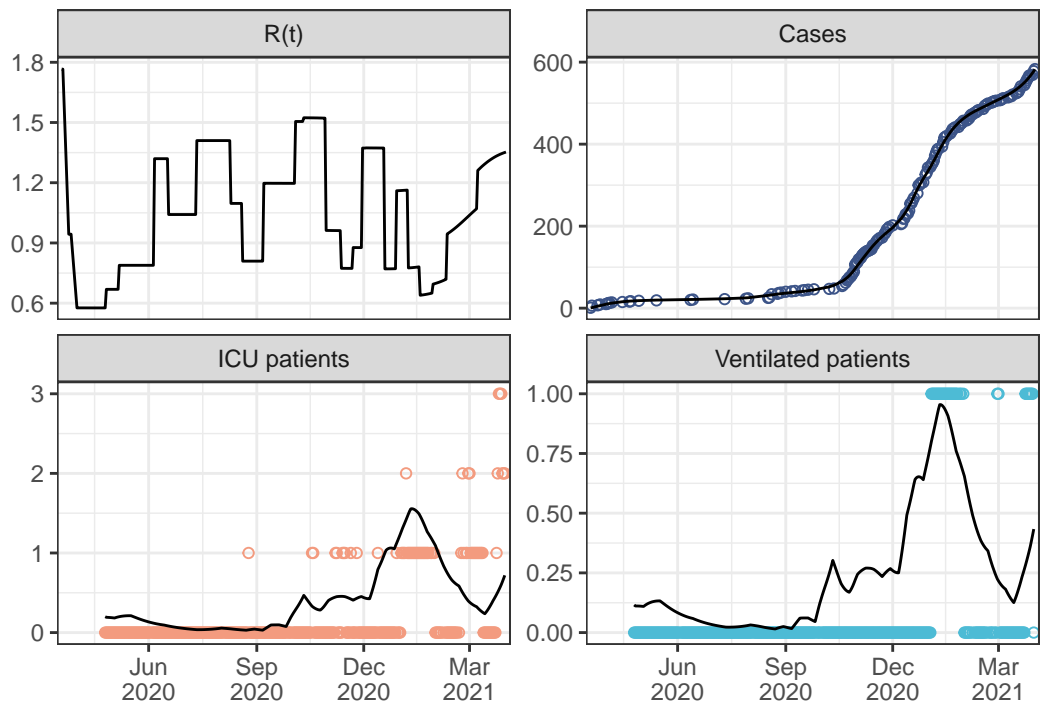

## LK Ludwigsburg

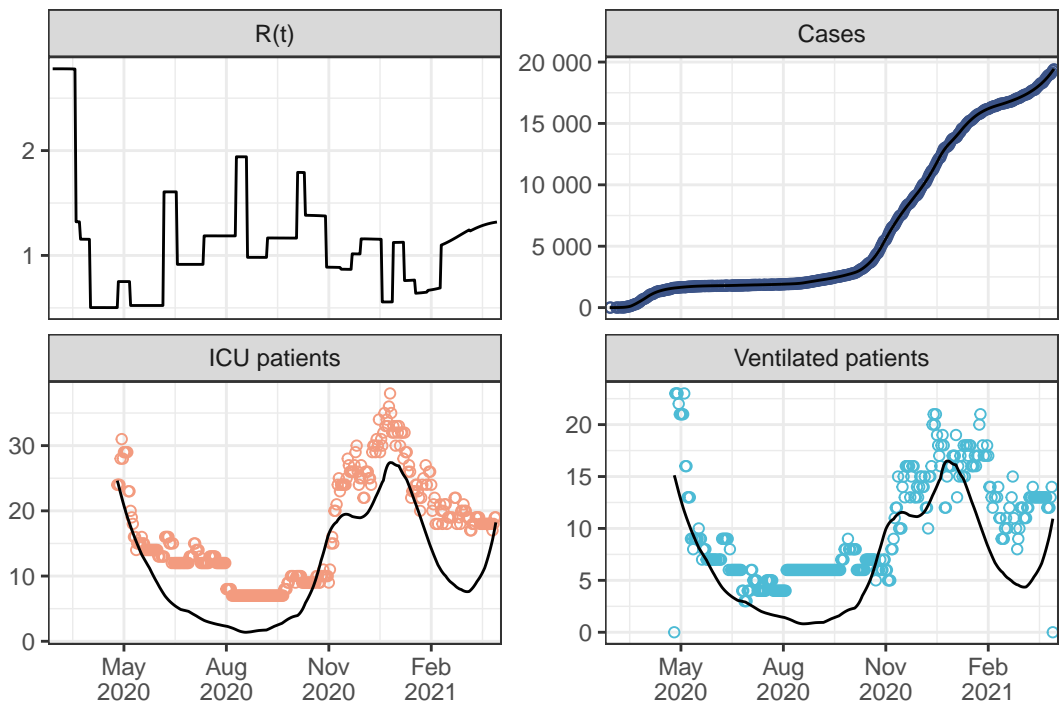

## LK Ludwigslust–Parchim

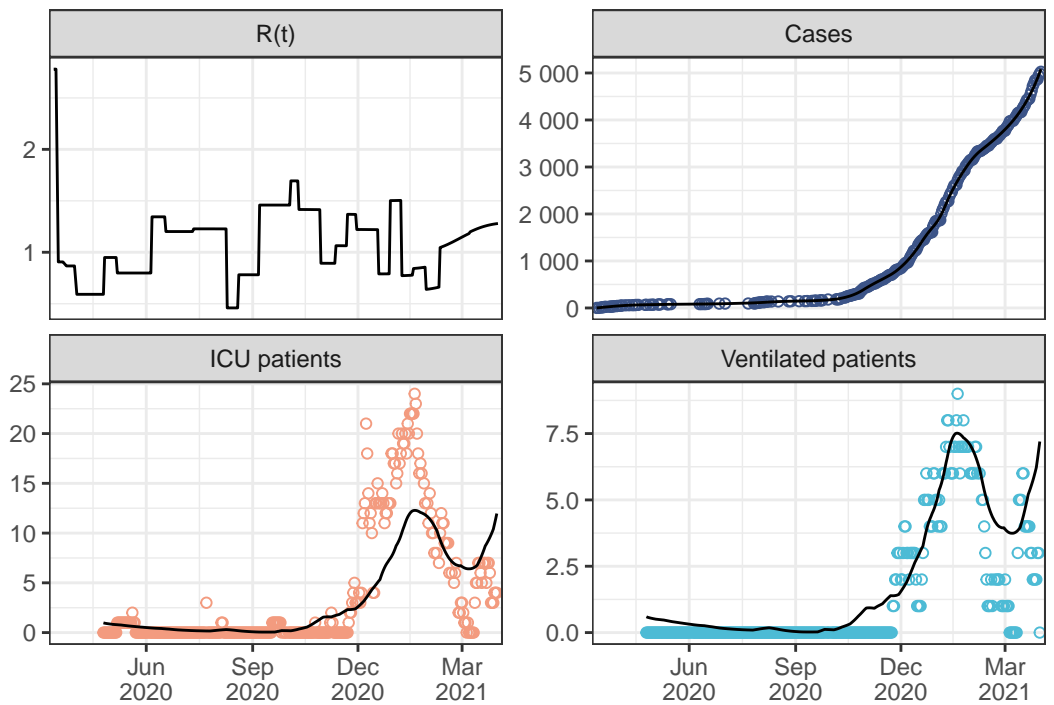

## LK Lüneburg

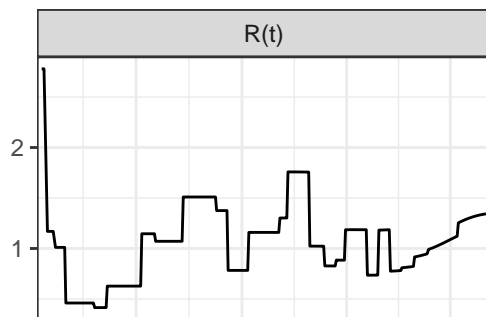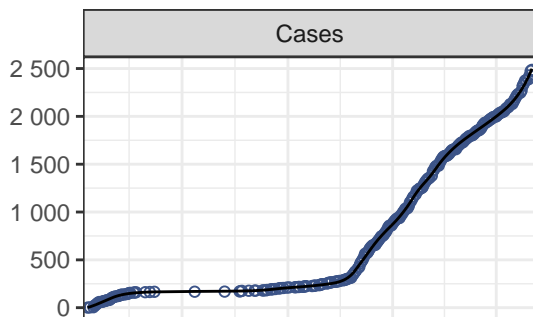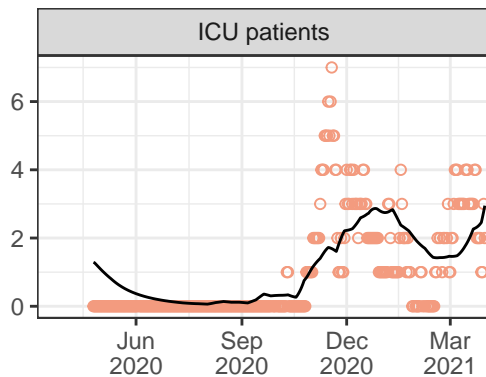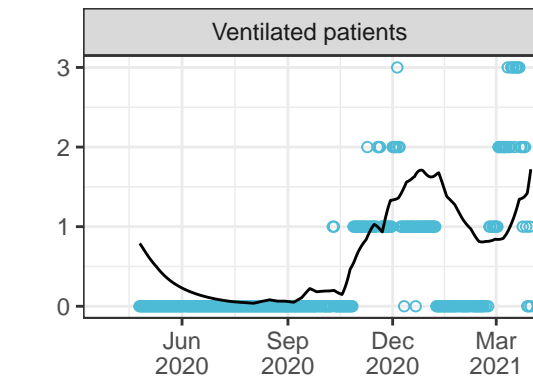

## LK Main-Kinzig-Kreis

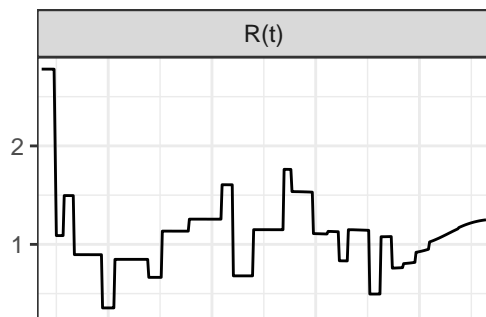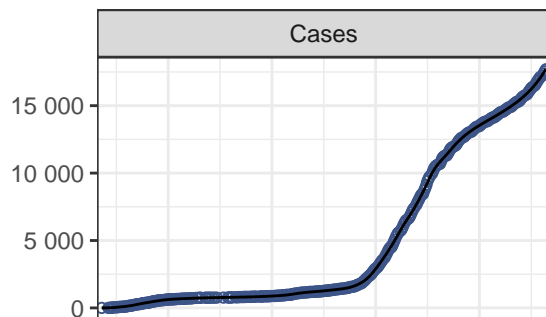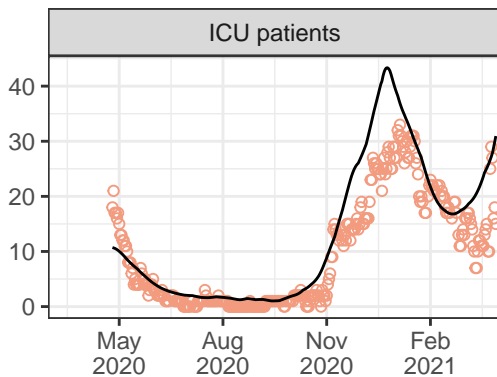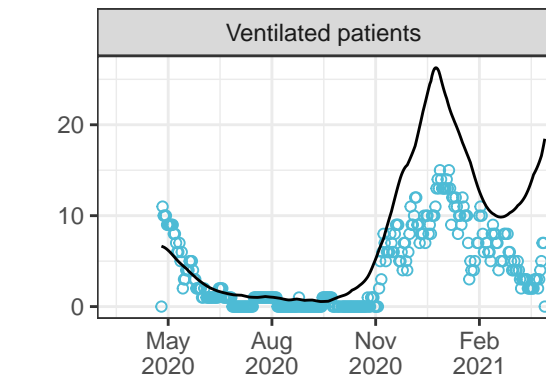

## LK Main–Spessart

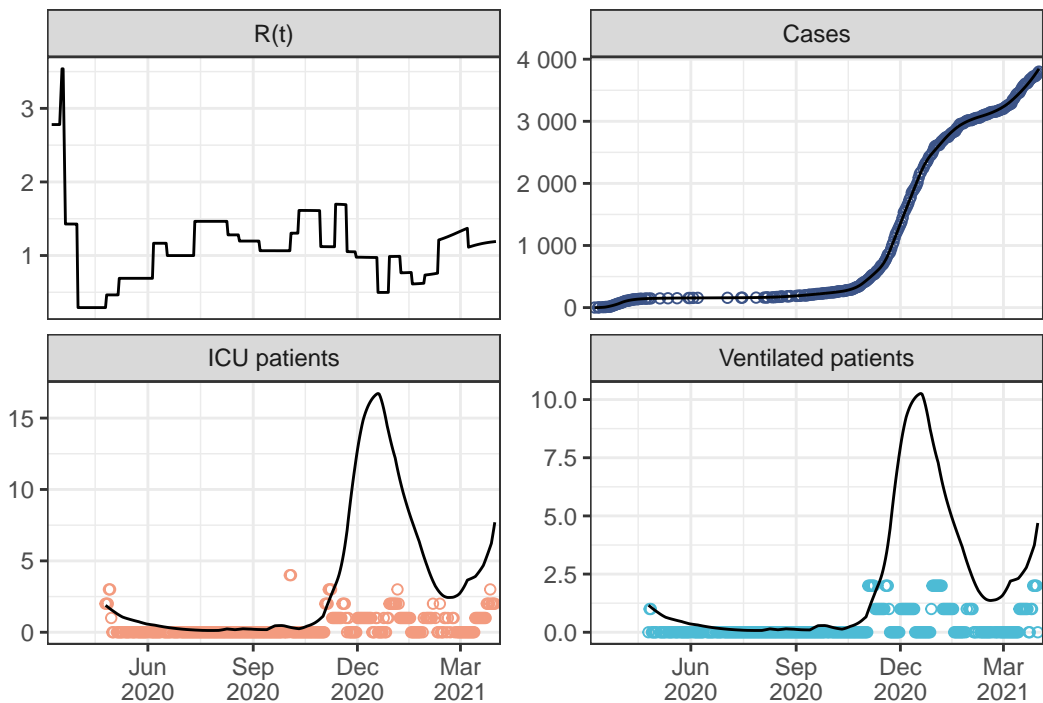

## LK Main–Tauber–Kreis

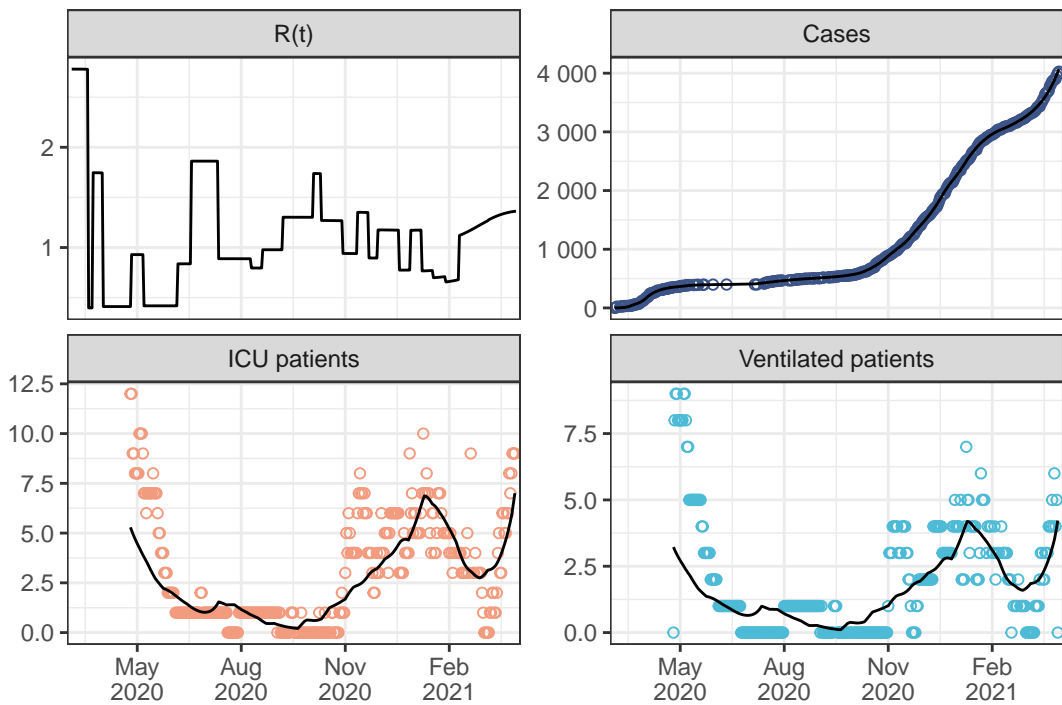

## LK Main–Taunus–Kreis

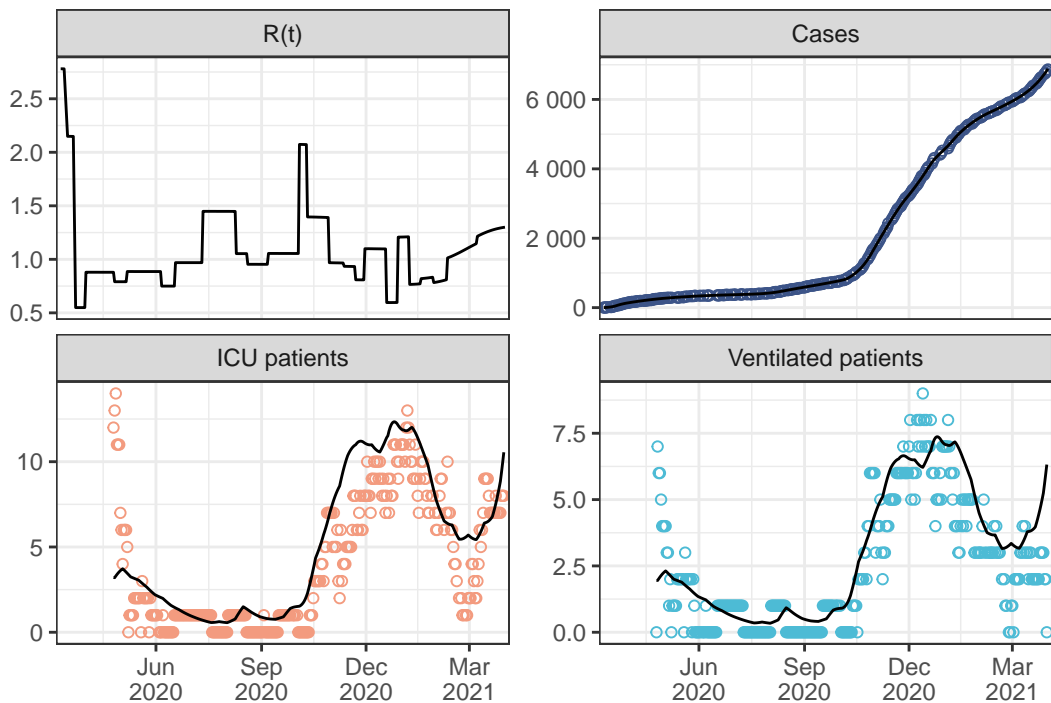

## LK Mainz–Bingen

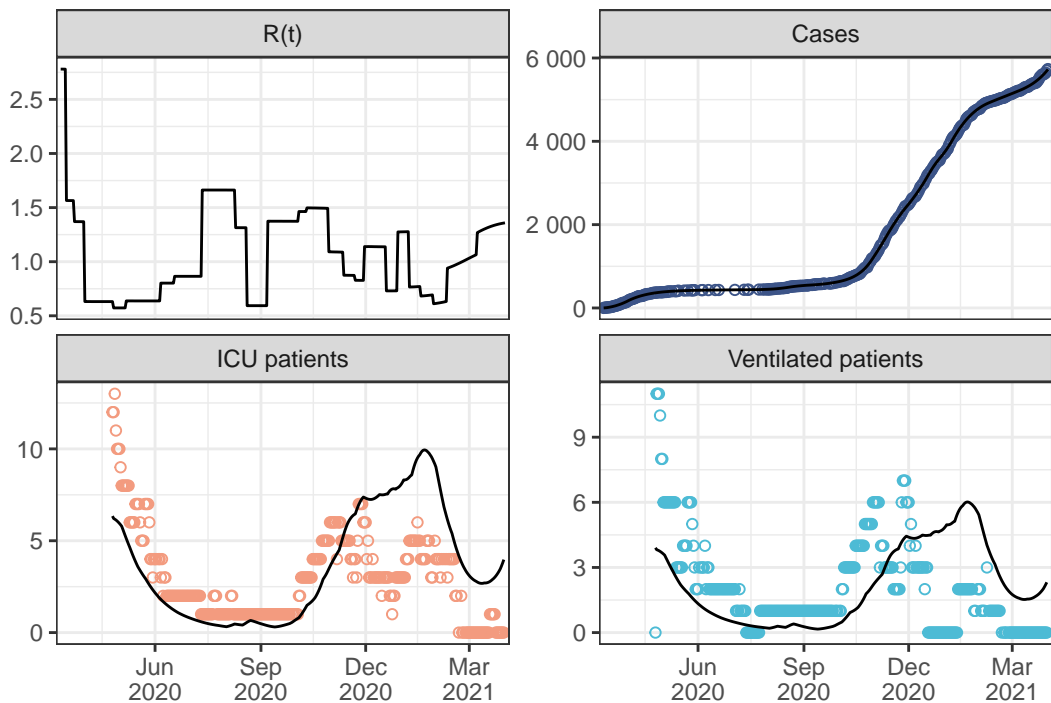

## LK Mansfeld–Südharz

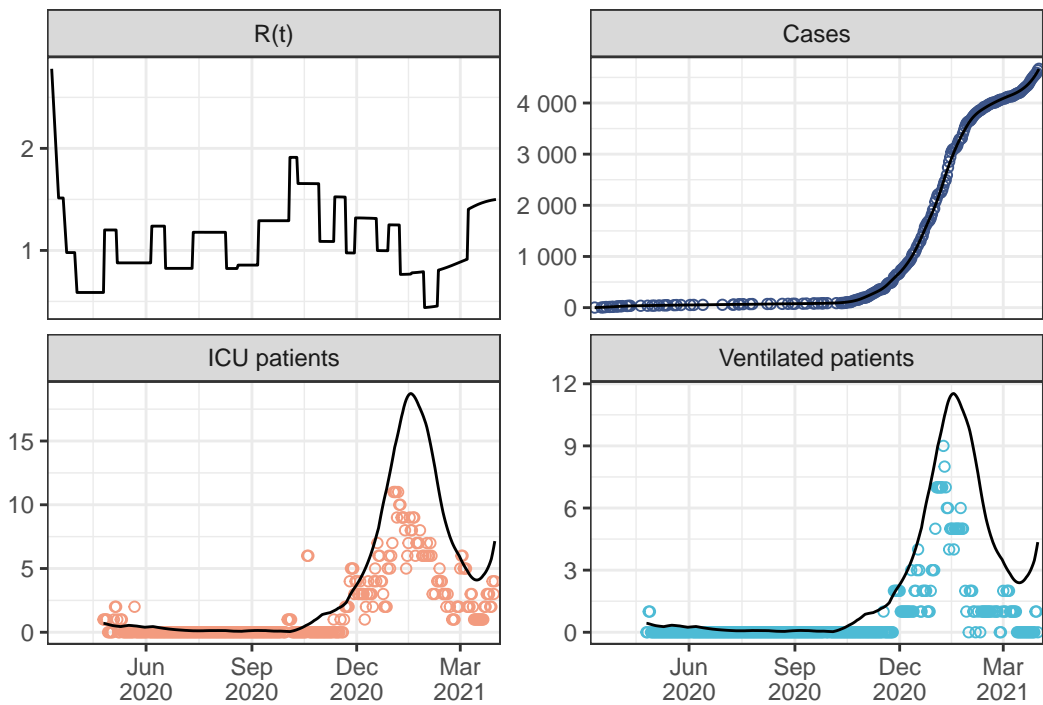

## LK Marburg–Biedenkopf

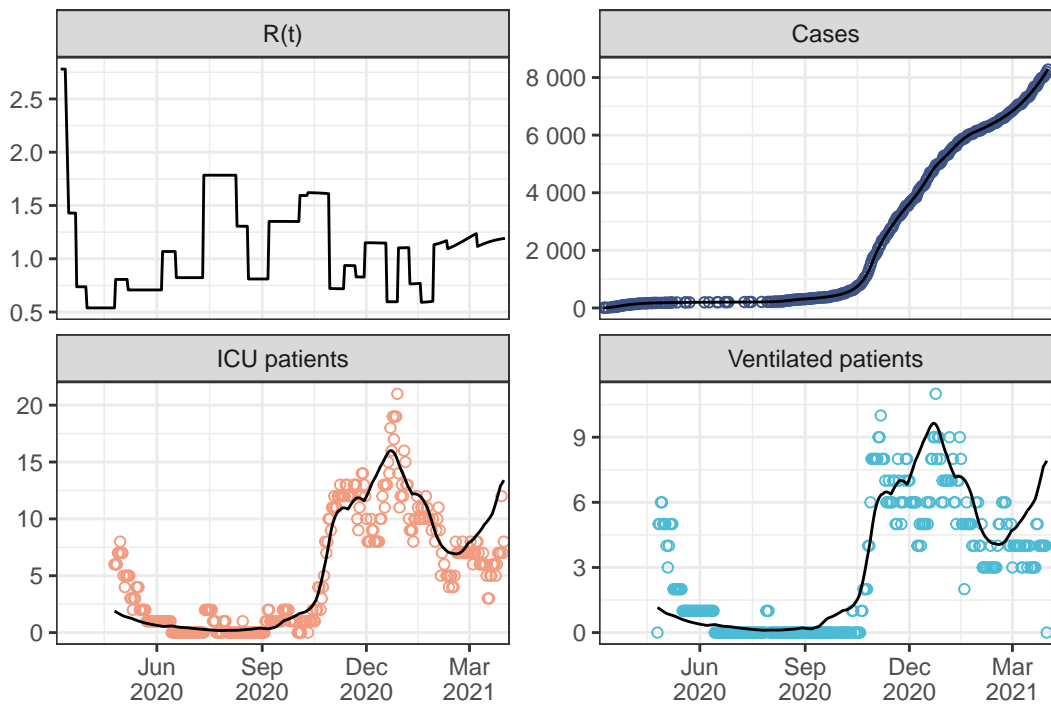

## LK Märkisch–Oderland

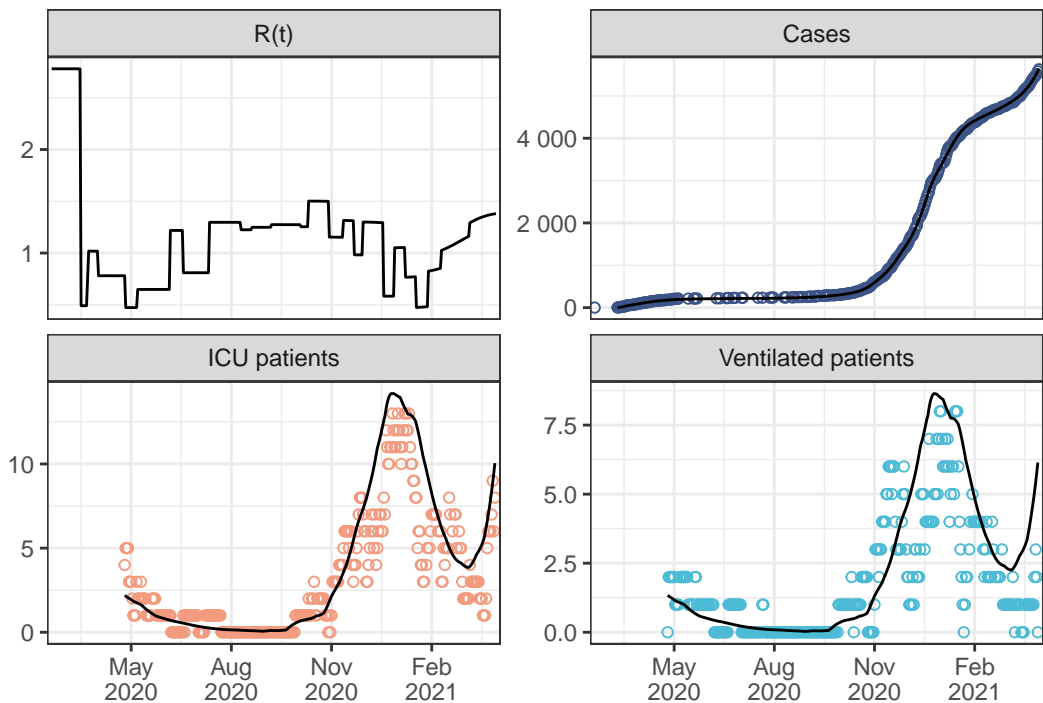

## LK Märkischer Kreis

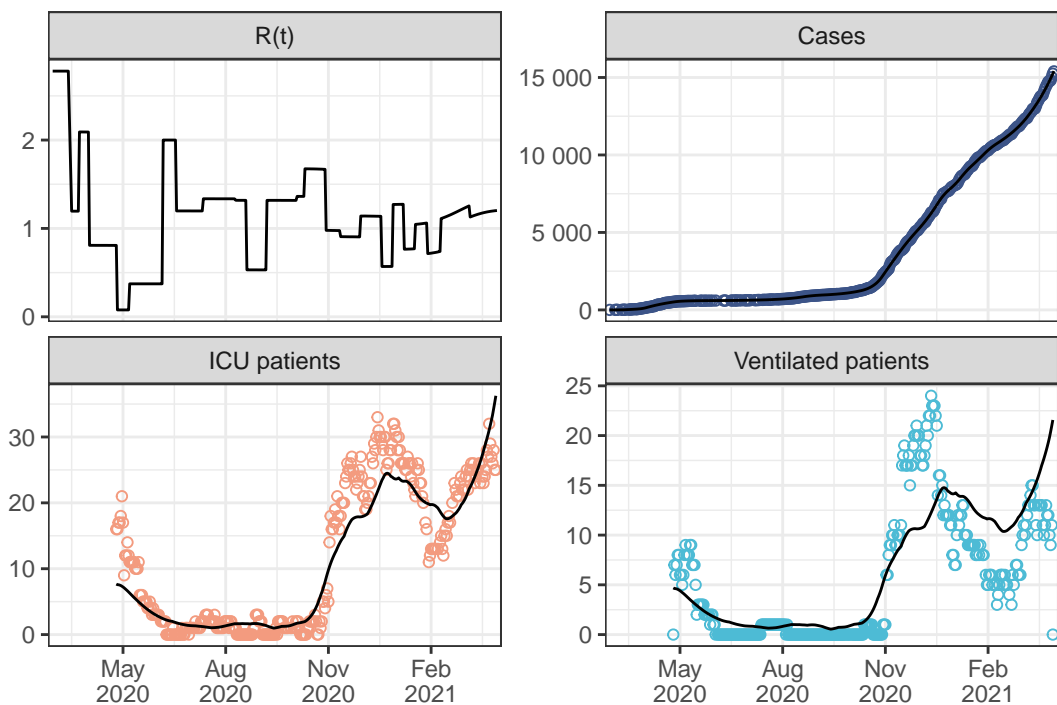

## LK Mayen-Koblenz

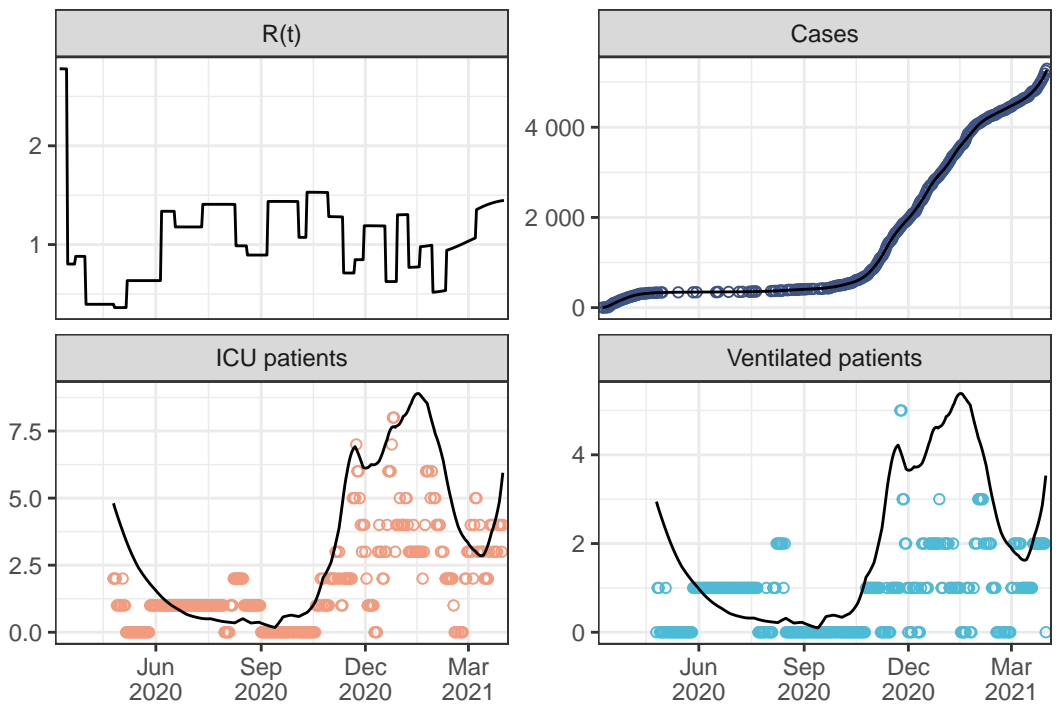

## LK Mecklenburgische Seenplatte

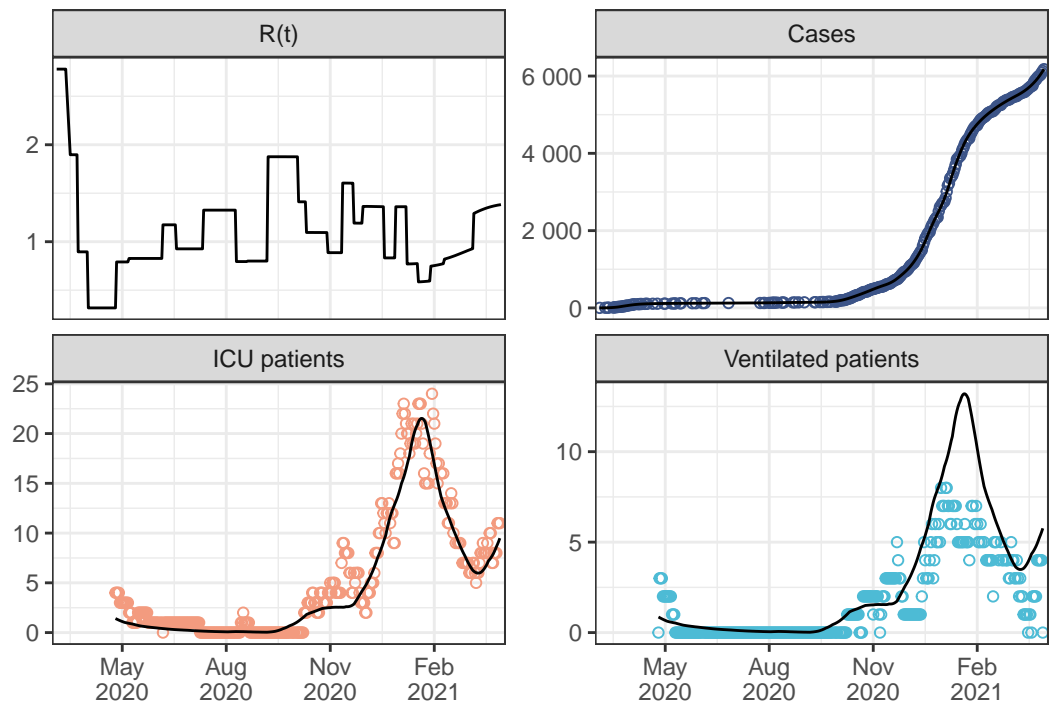

## LK Meißen

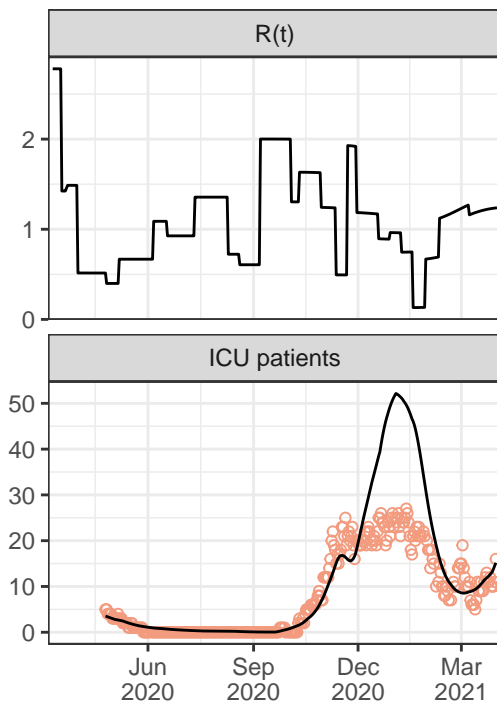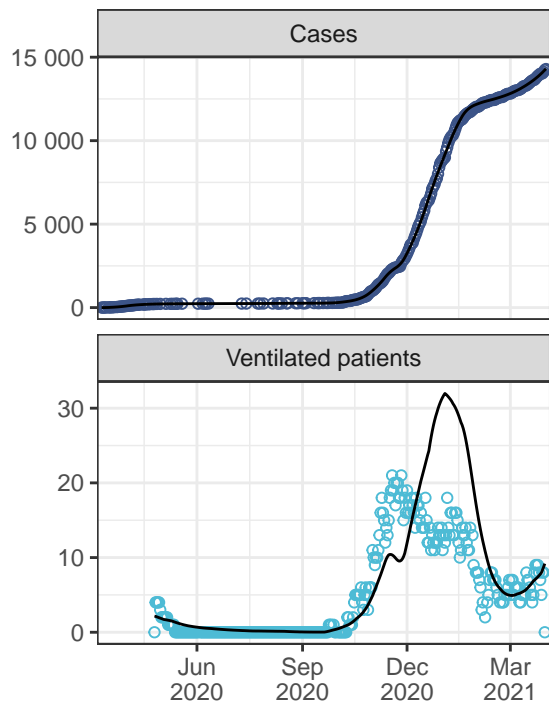

## LK Merzig–Wadern

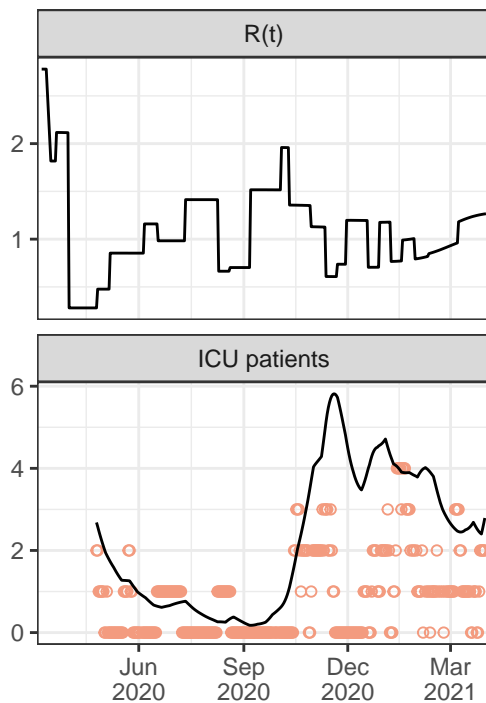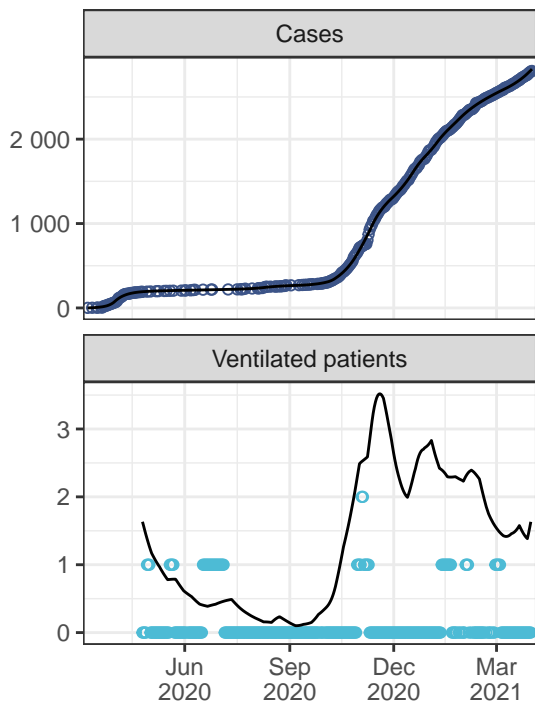

## LK Mettmann

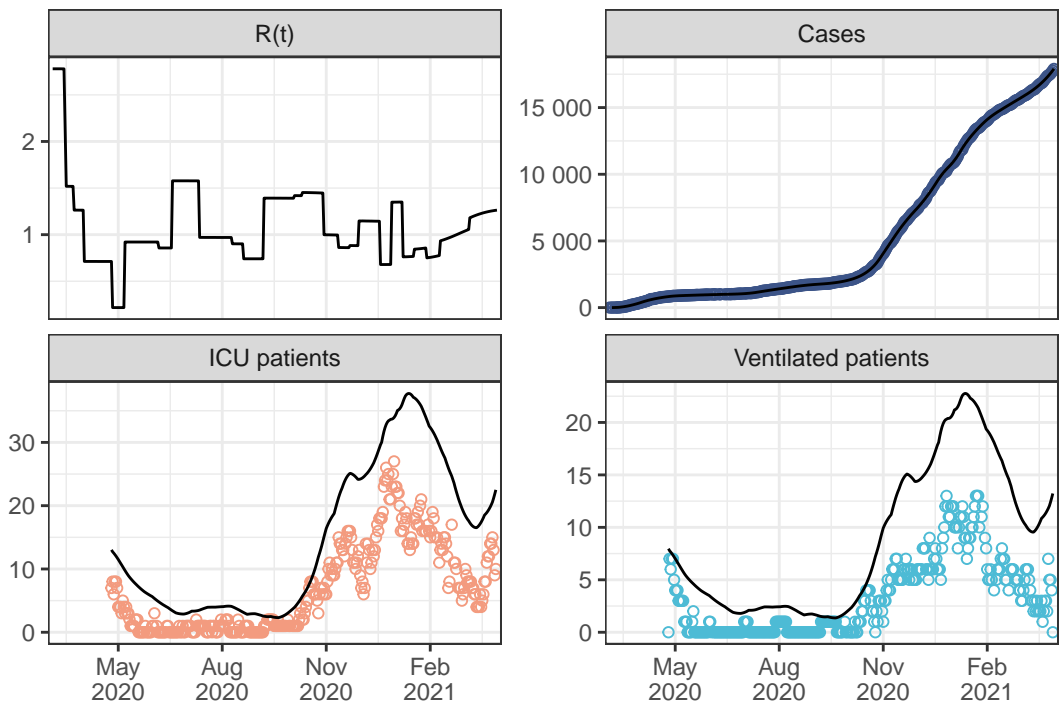

## LK Miesbach

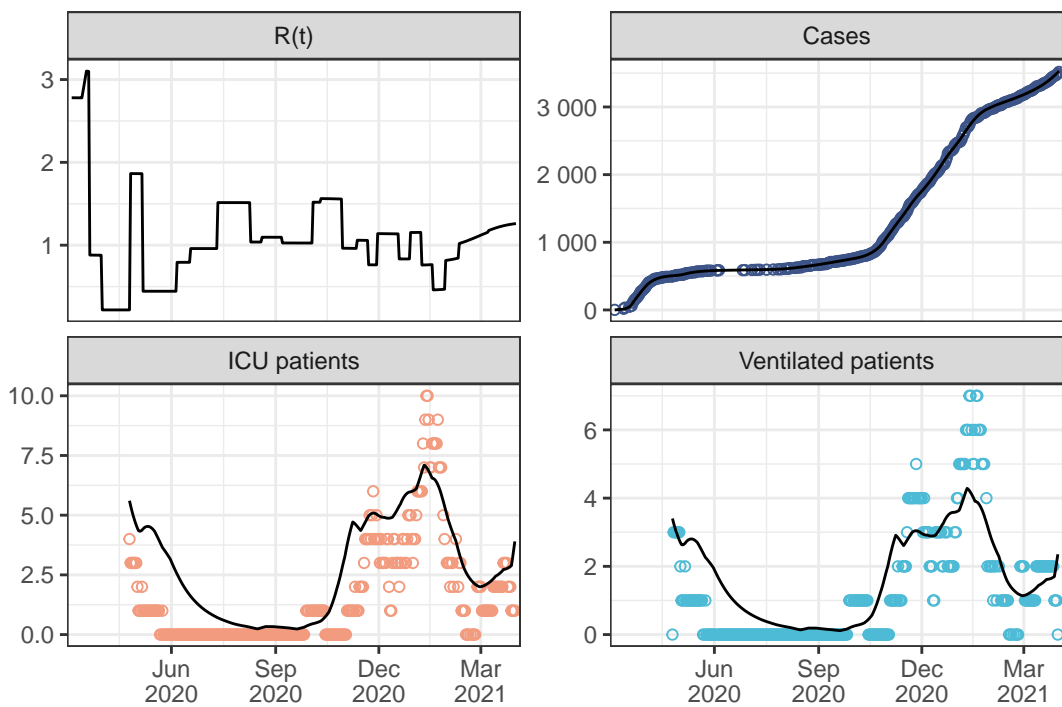

## LK Miltenberg

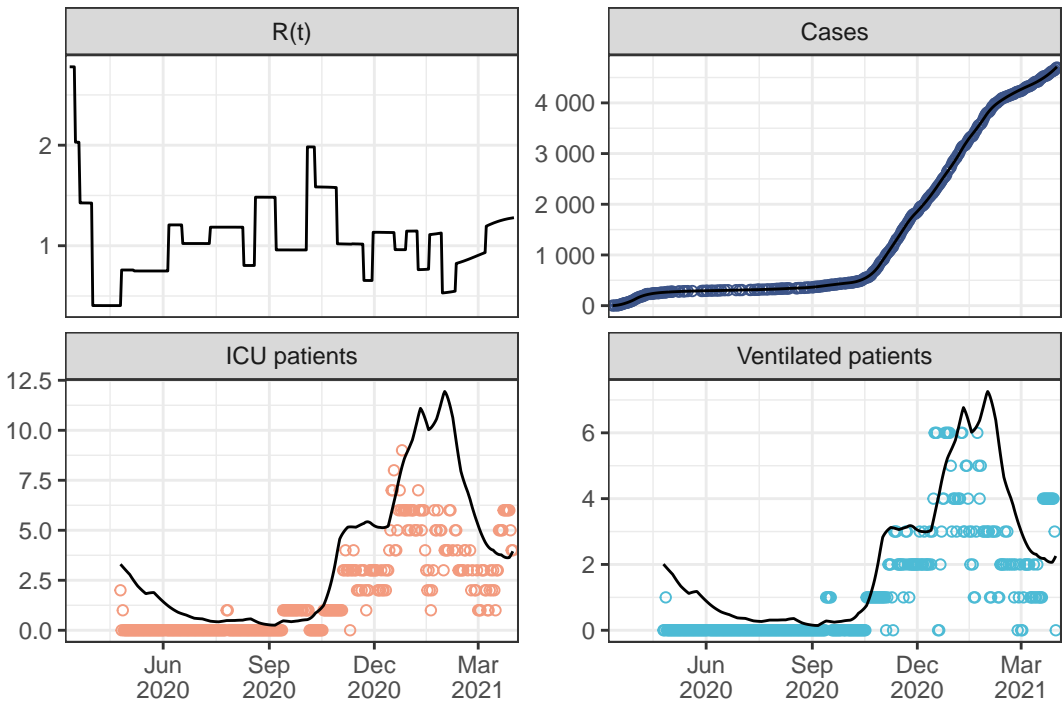

## LK Minden-Lübbecke

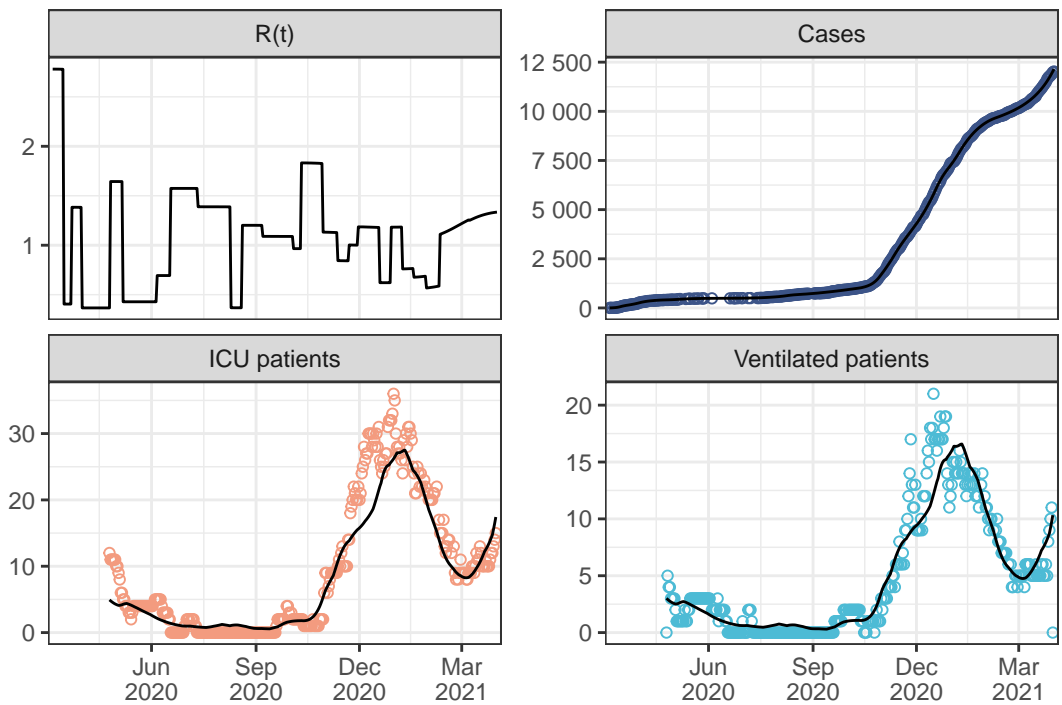

## LK Mittelsachsen

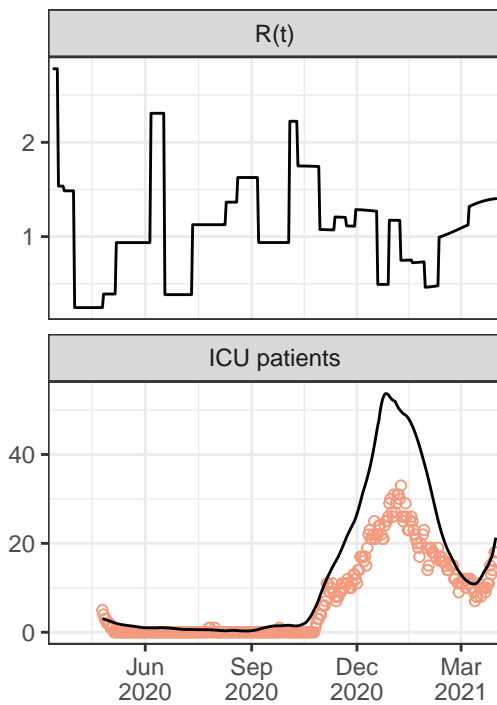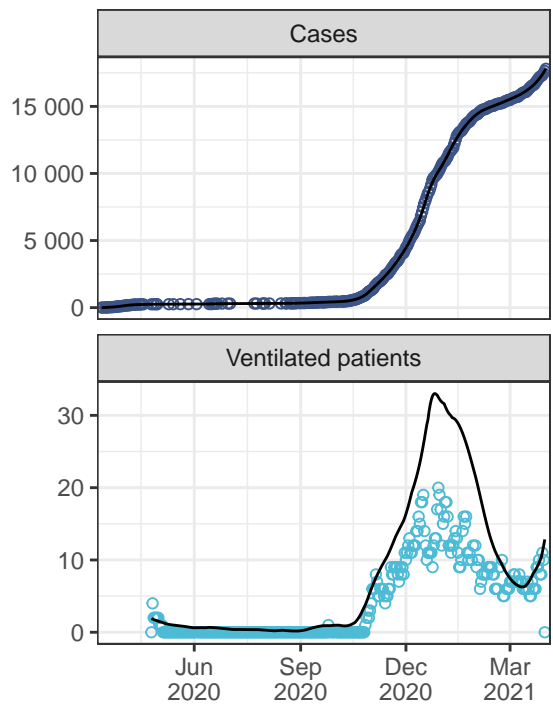

## LK Mühldorf a. Inn

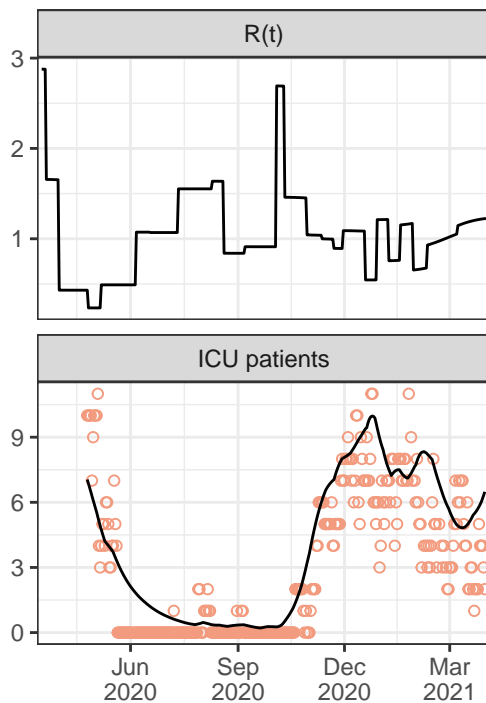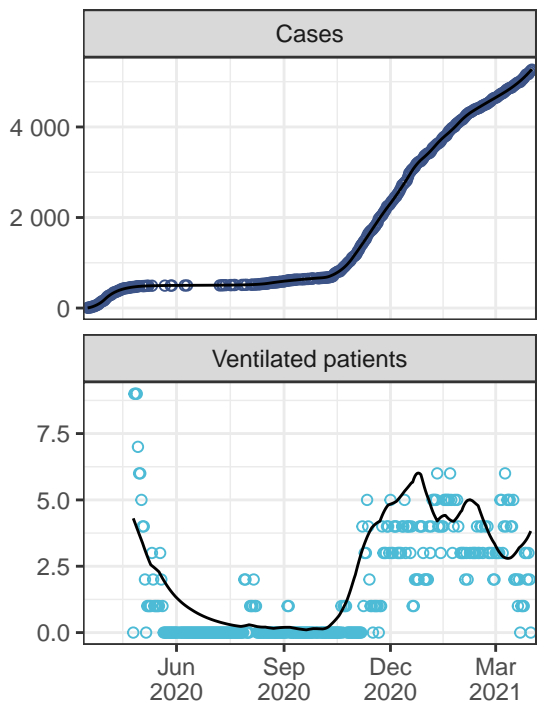

## LK München

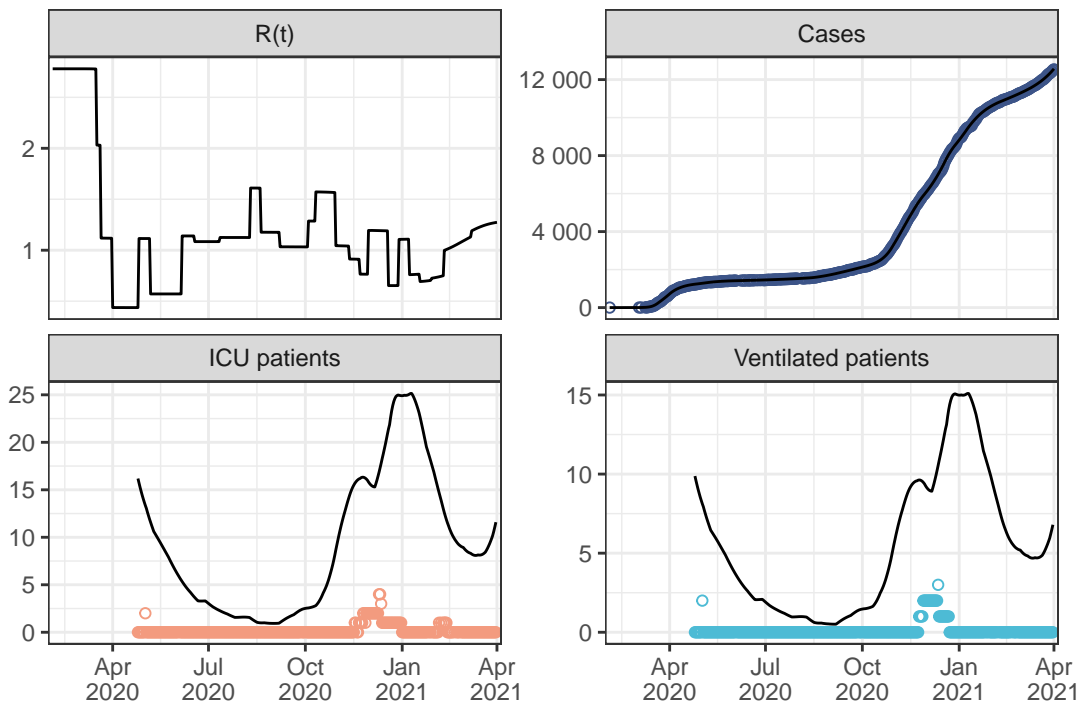

## LK Neckar–Odenwald–Kreis

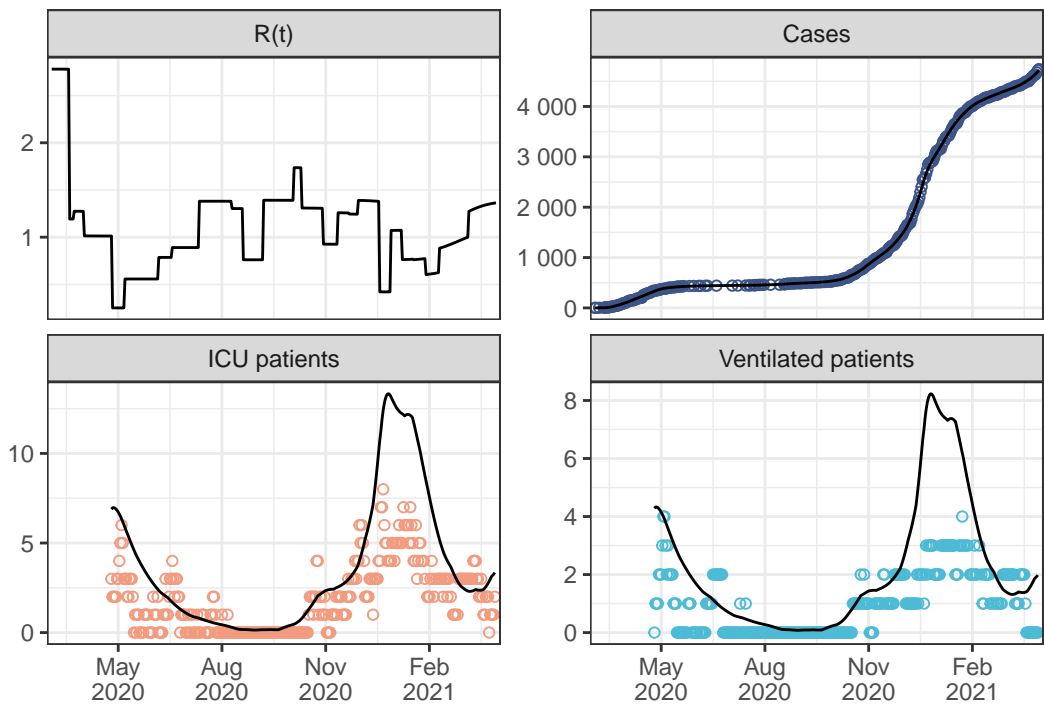

## LK Neu-Ulm

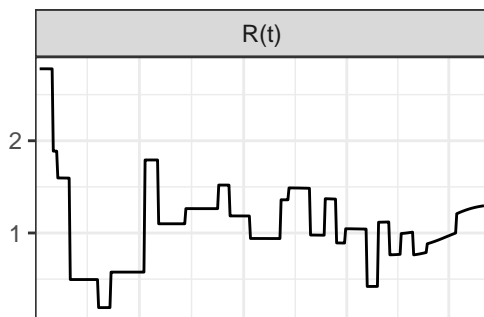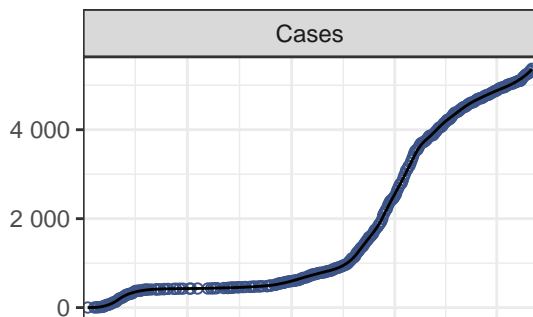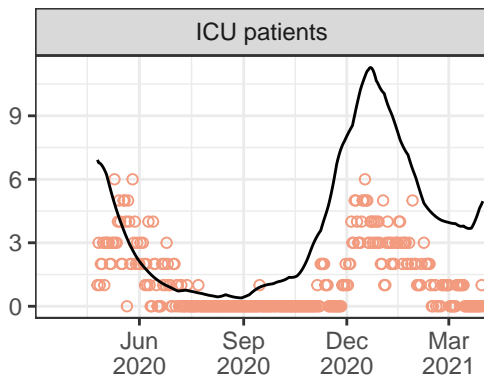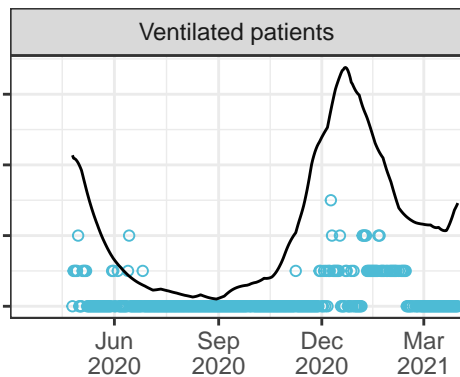

## LK Neuburg-Schrobenhausen

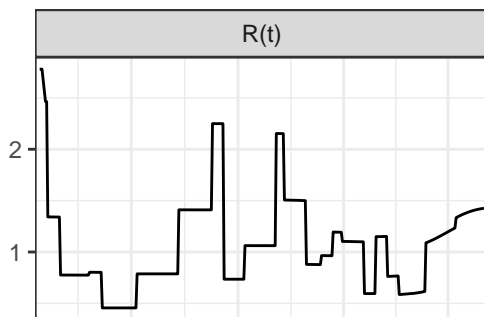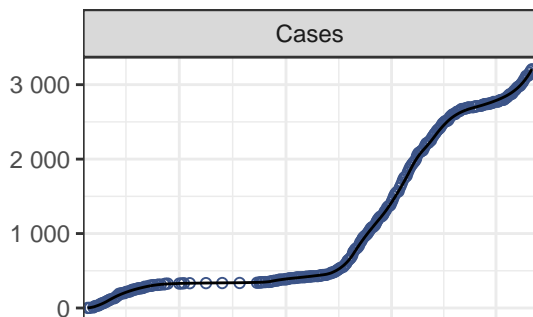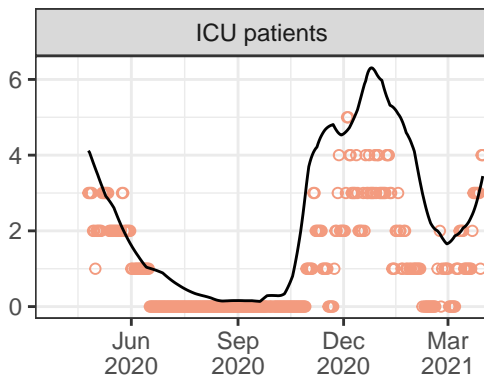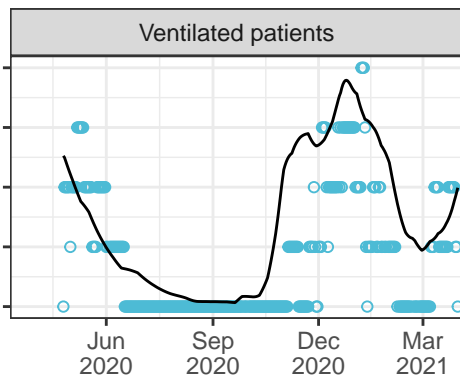

## LK Neumarkt i.d.OPf.

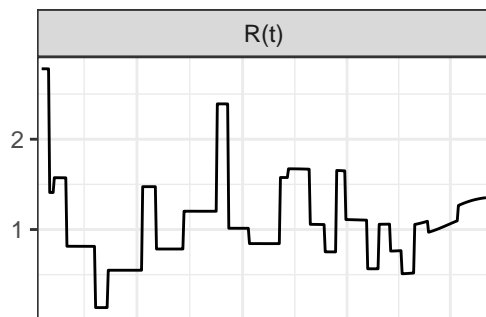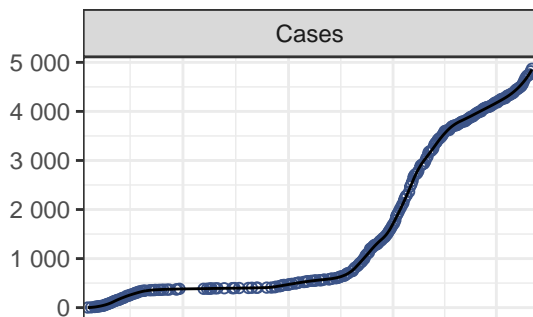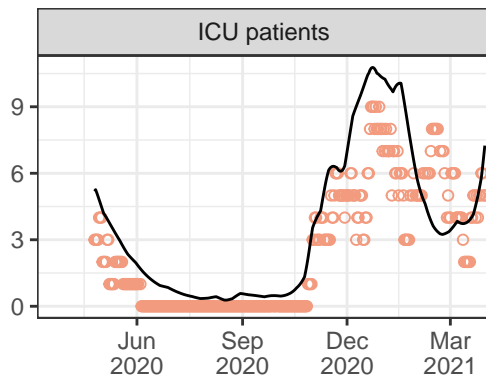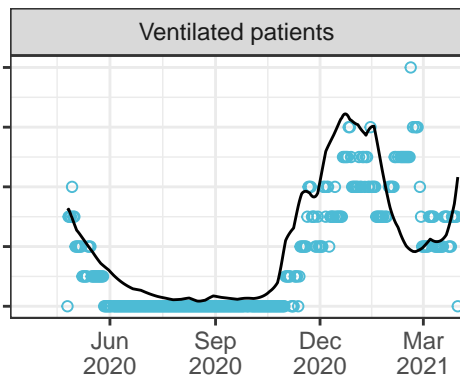

## LK Neunkirchen

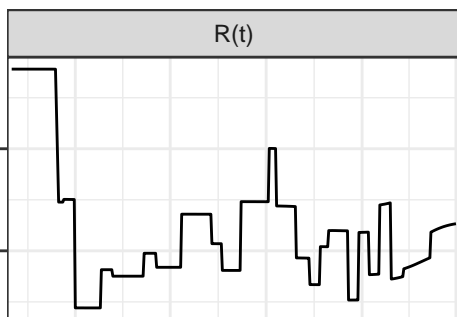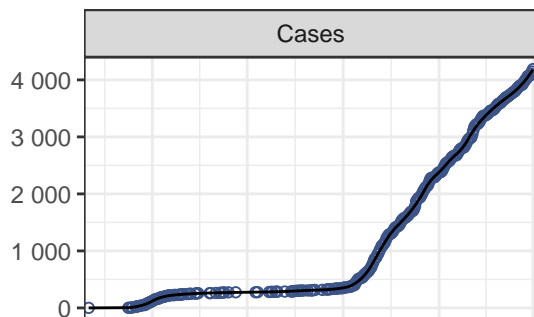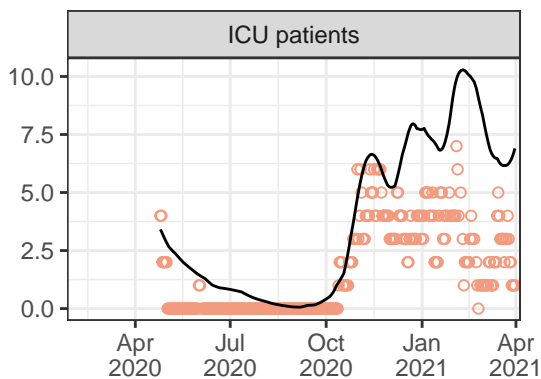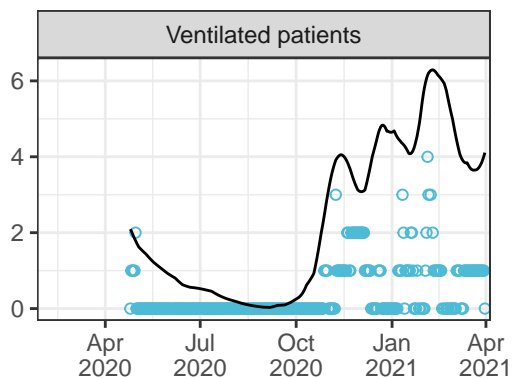

## LK Neustadt a.d.Aisch–Bad Windsheim

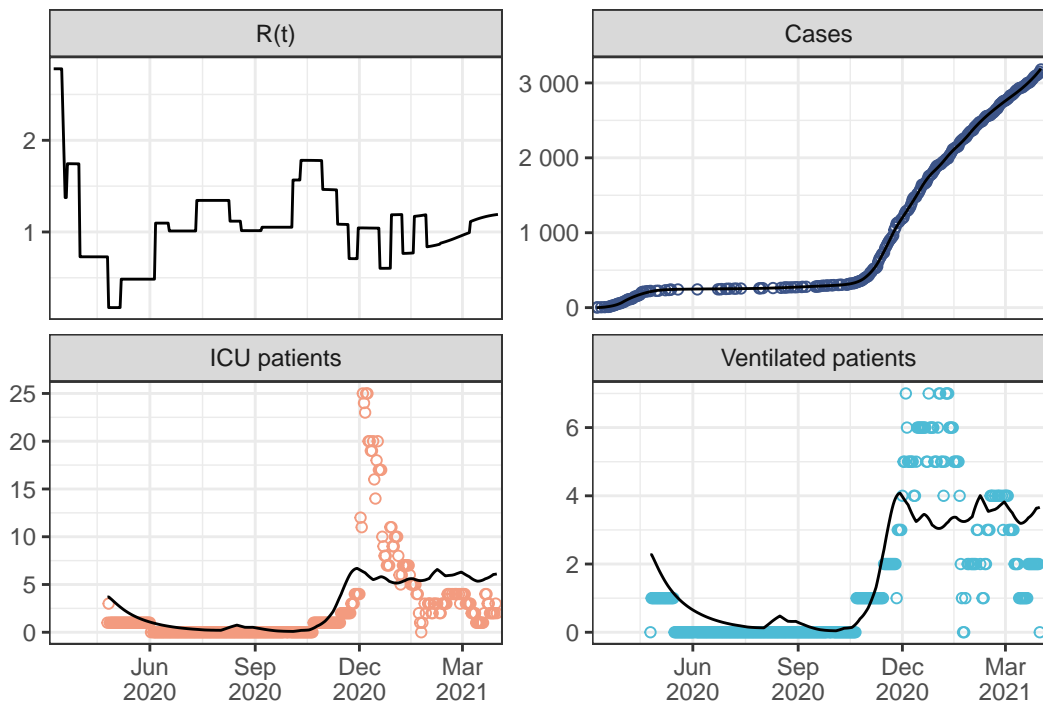

## LK Neustadt a.d.Waldnaab

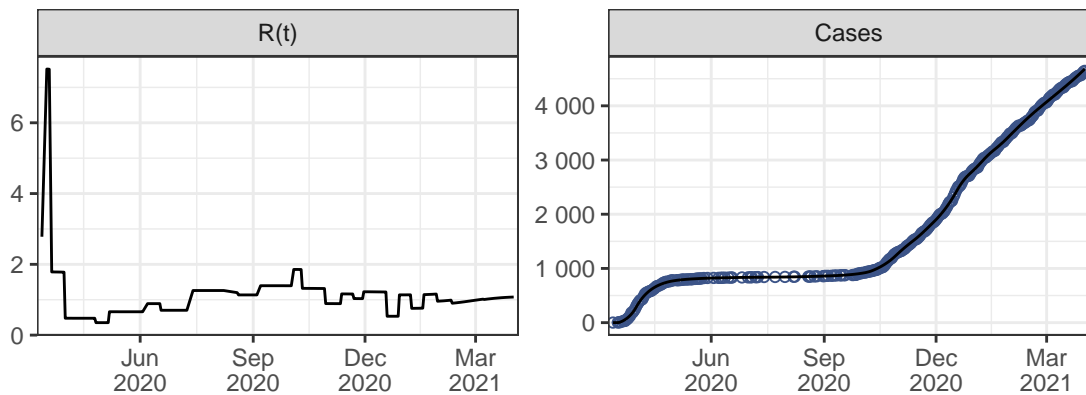

## LK Neuwied

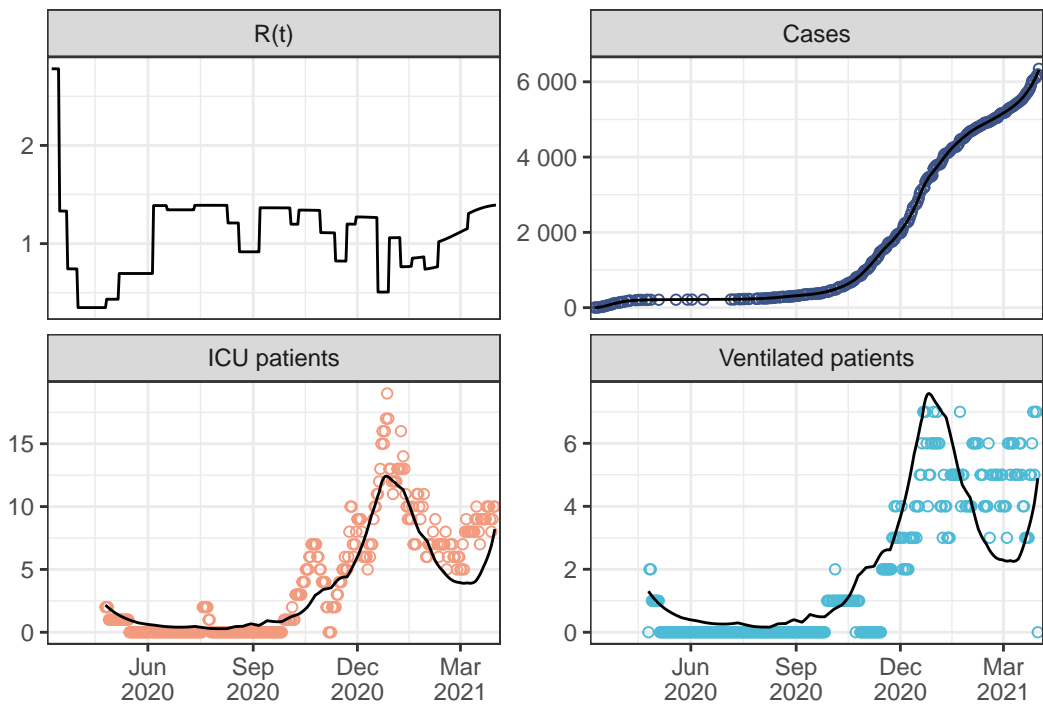

## LK Nienburg (Weser)

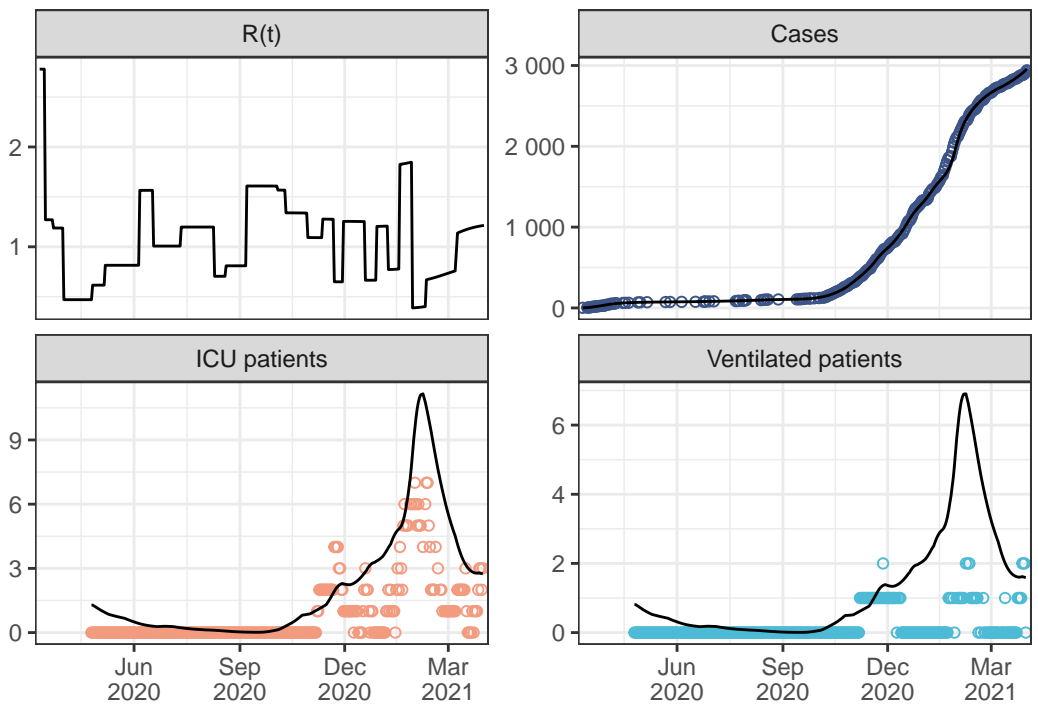

## LK Nordfriesland

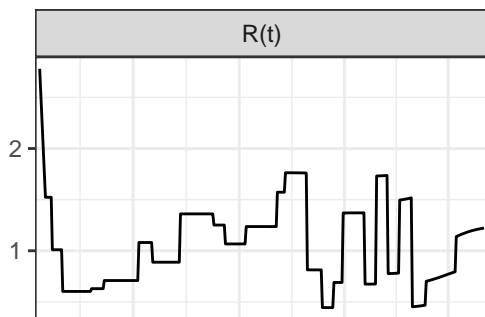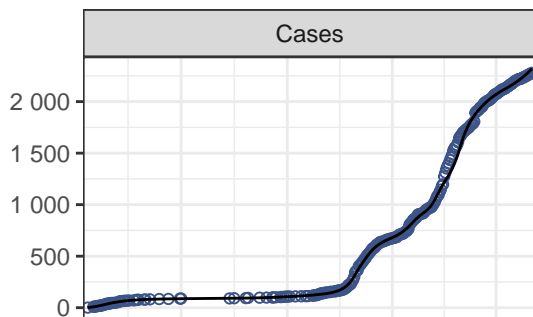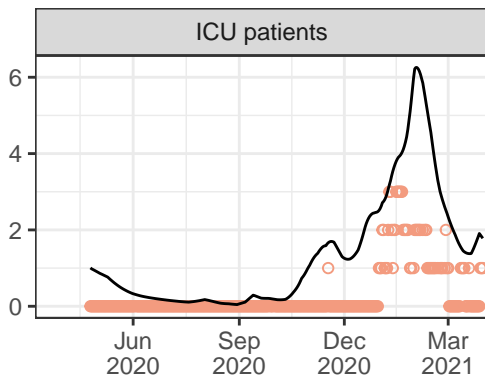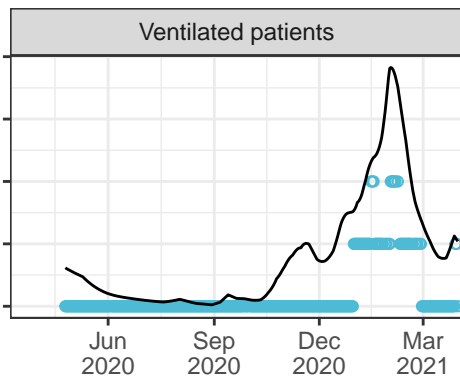

## LK Nordhausen

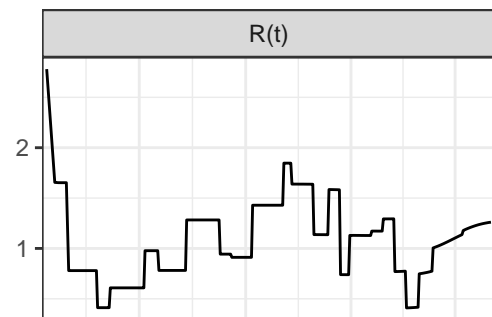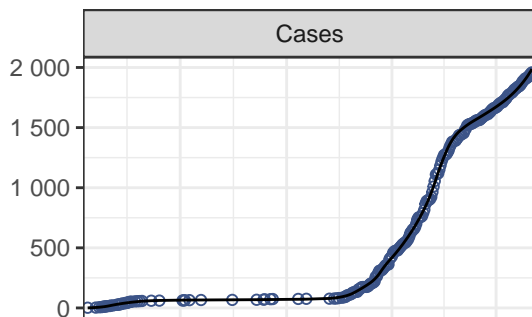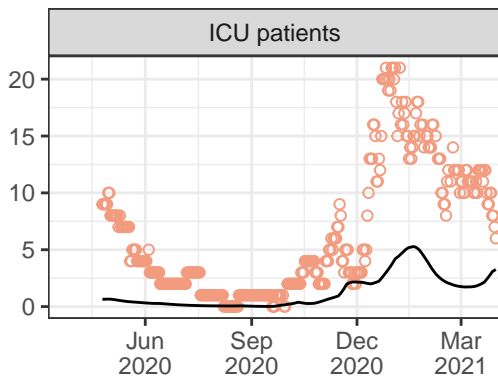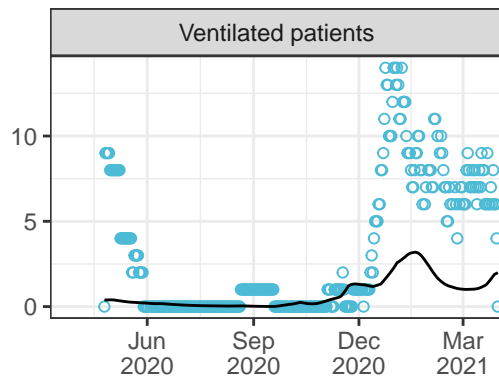

## LK Nordsachsen

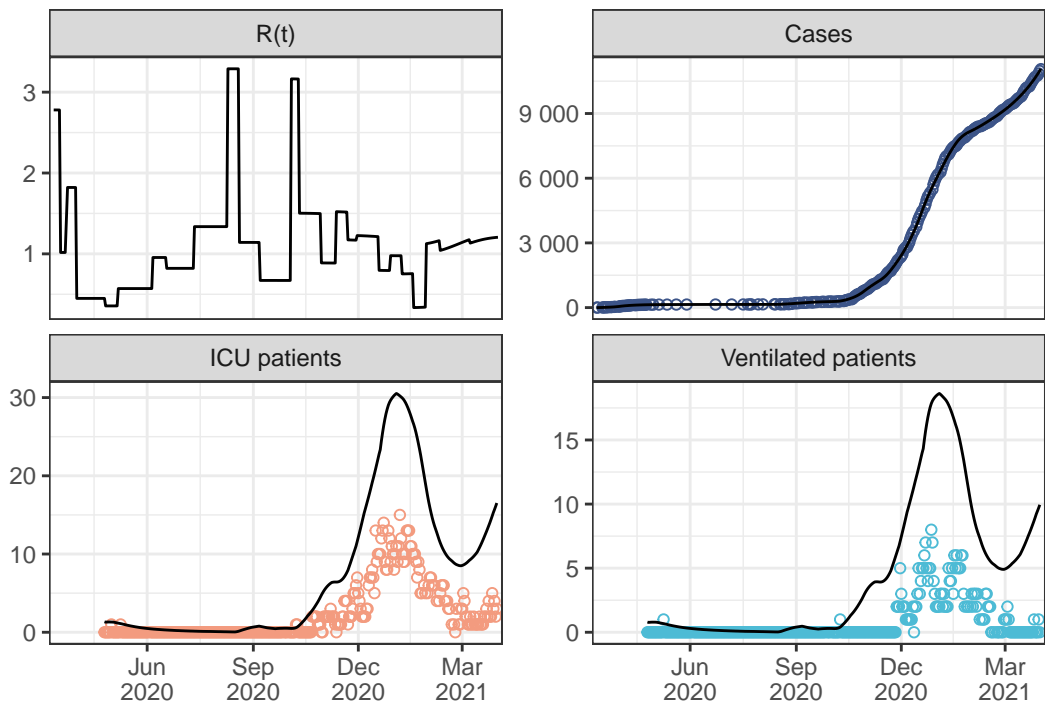

## LK Nordwestmecklenburg

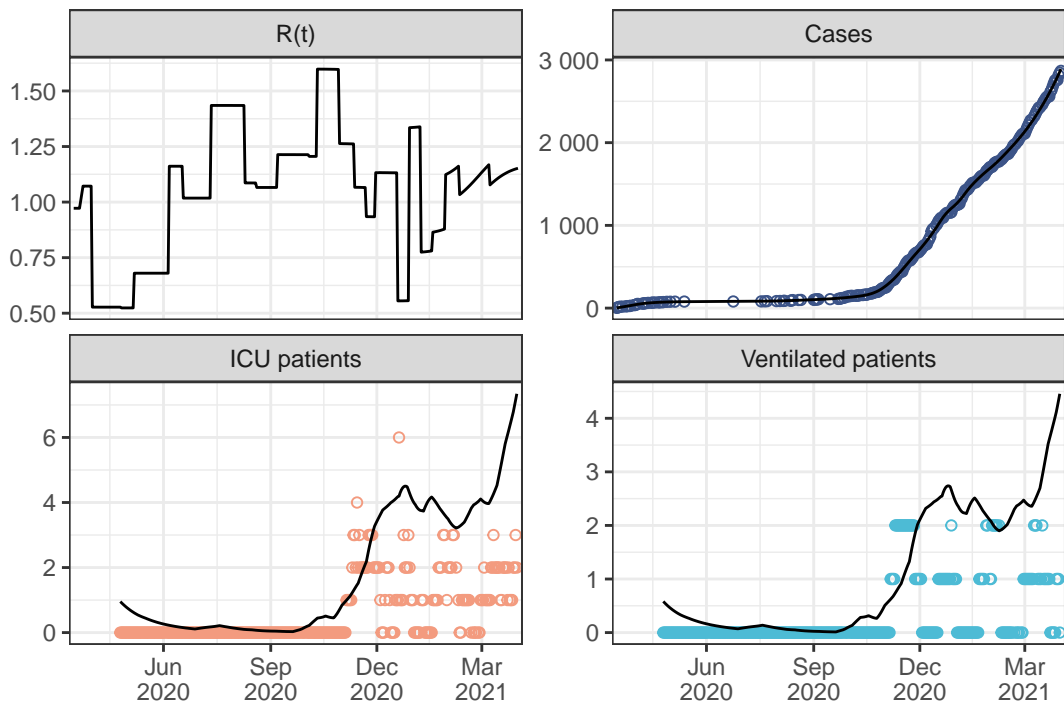

## LK Northeim

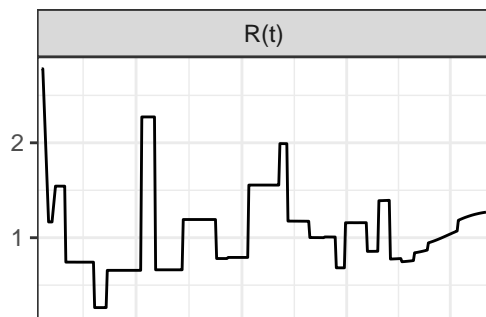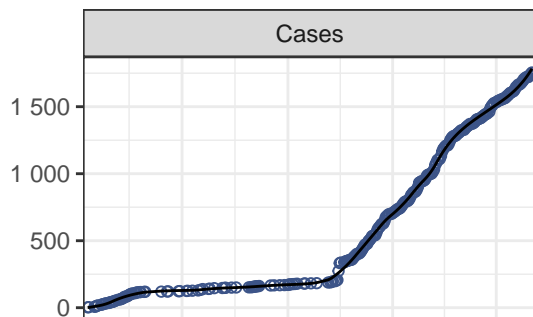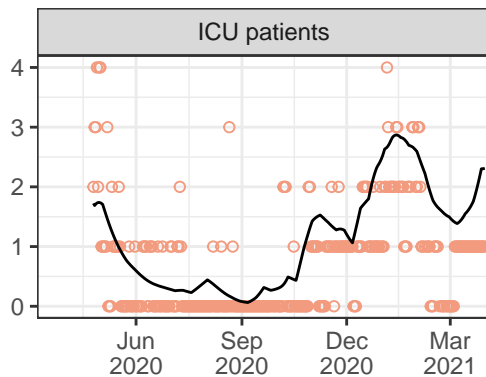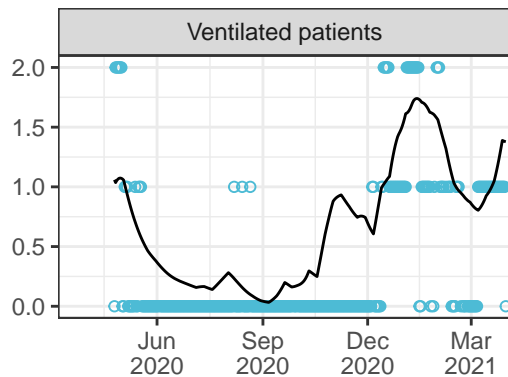

## LK Nürnberger Land

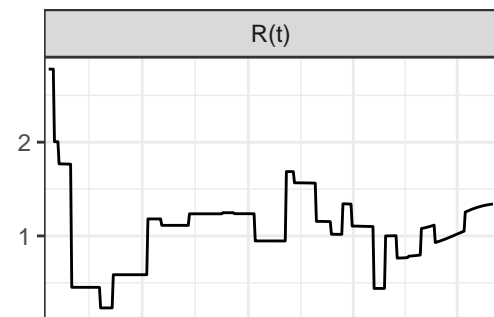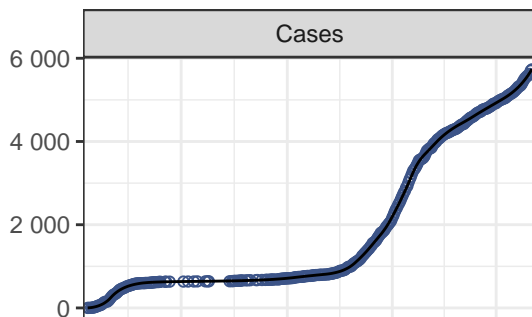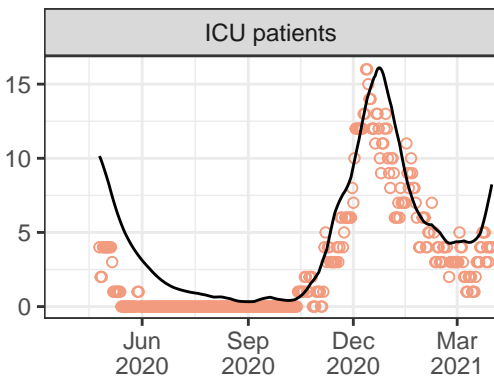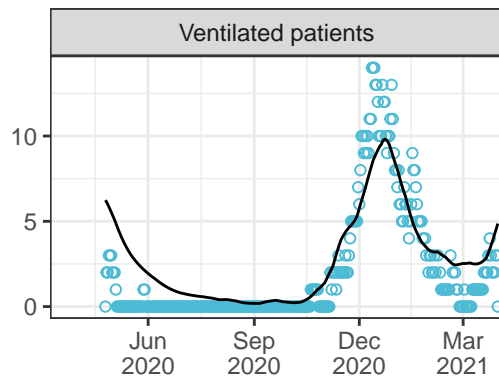

## LK Oberallgäu

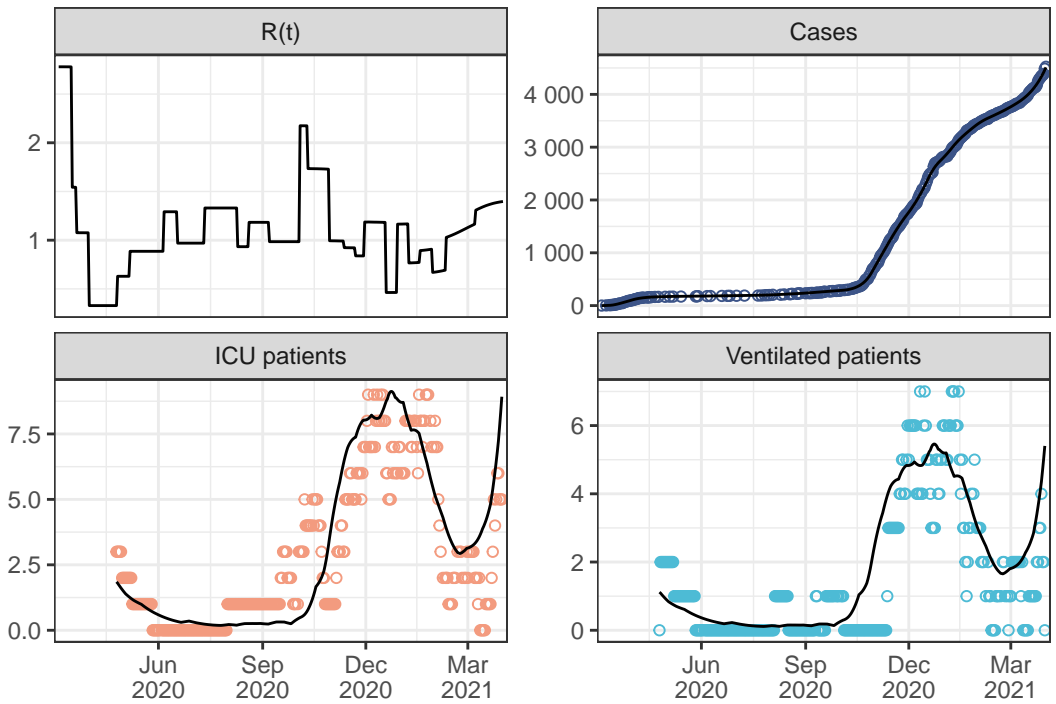

## LK Oberbergischer Kreis

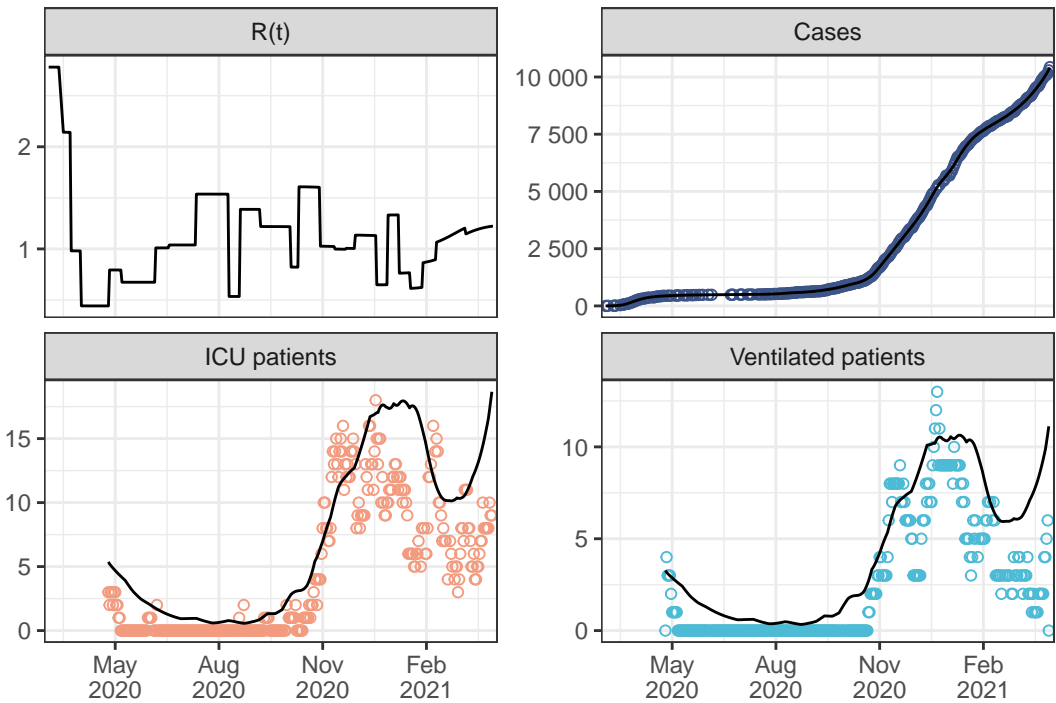

## LK Oberhavel

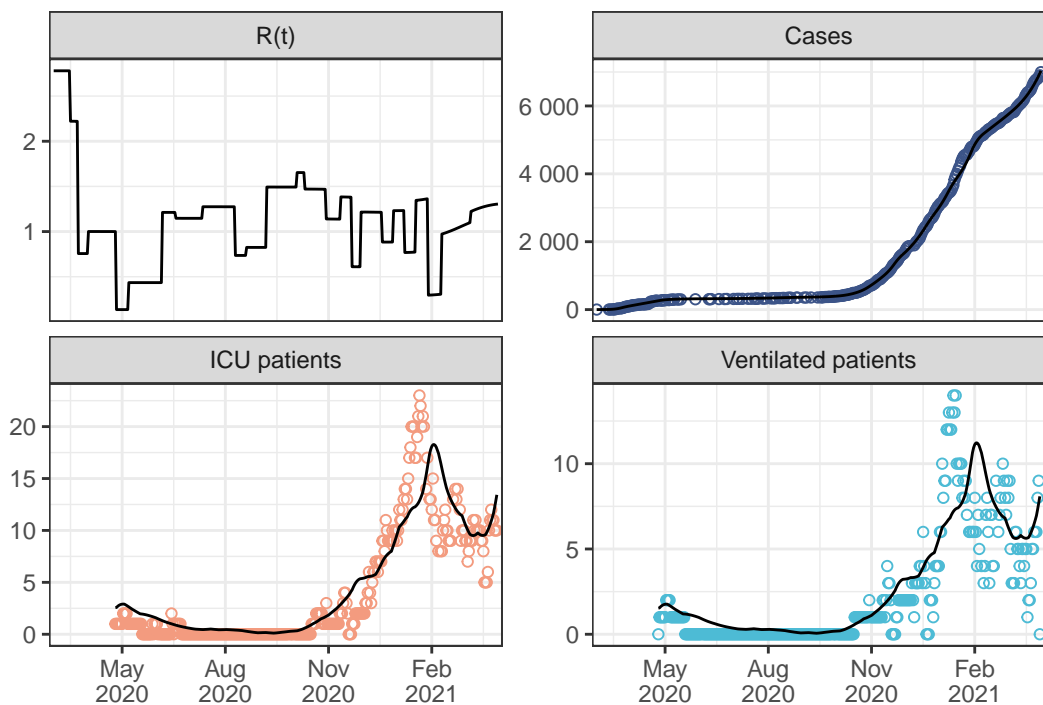

## LK Oberspreewald–Lausitz

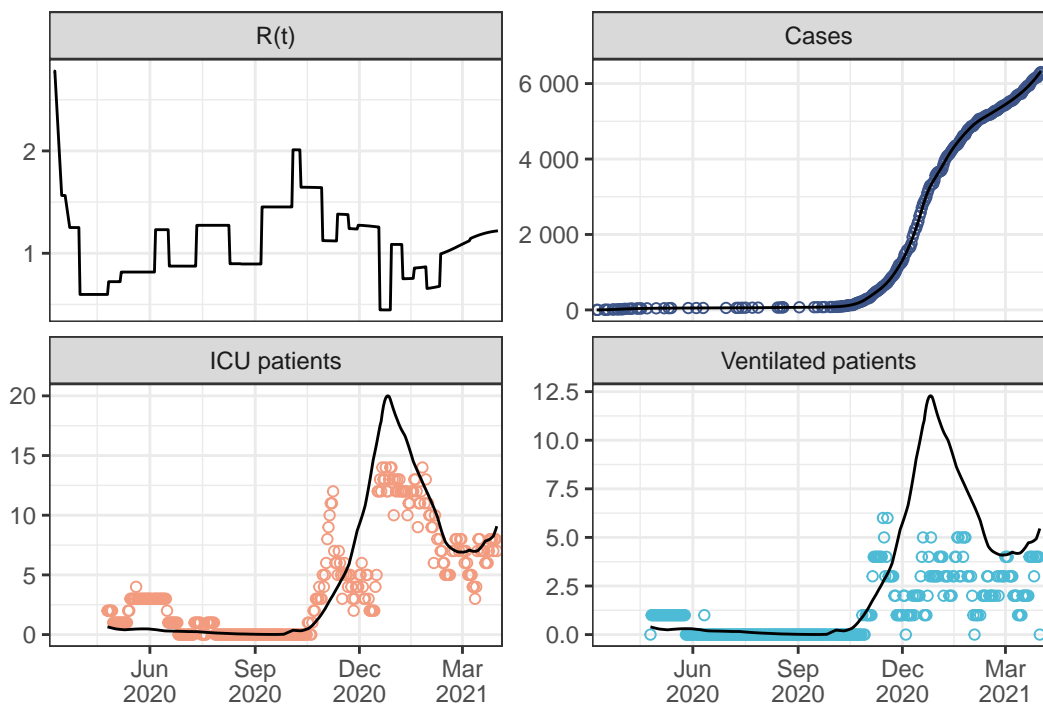

## LK Odenwaldkreis

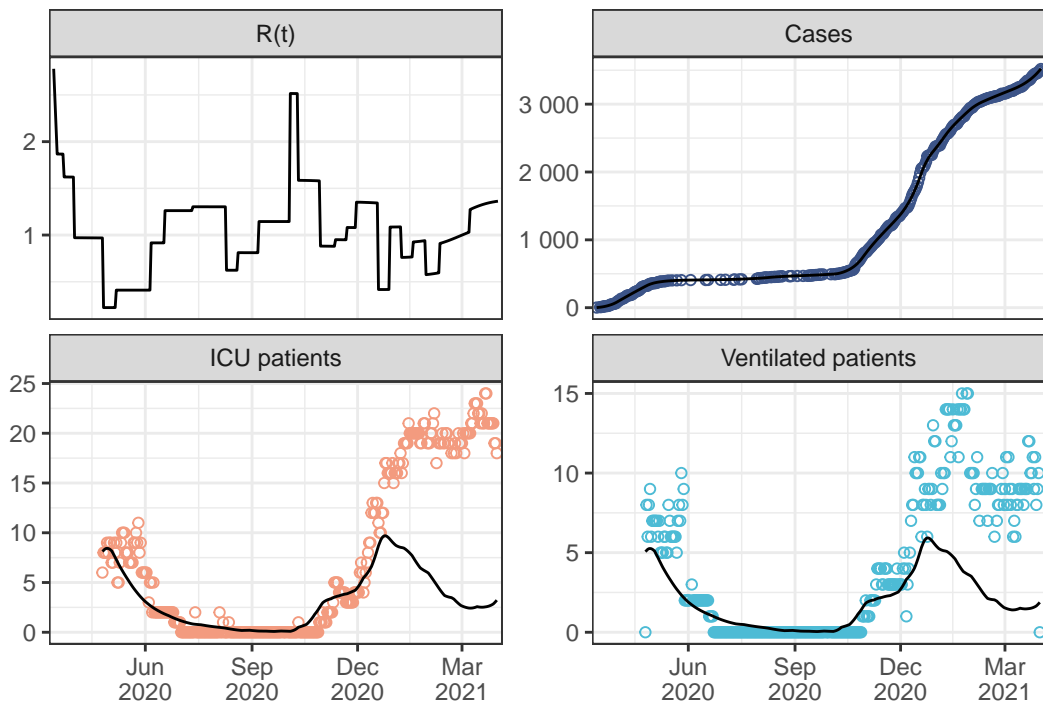

## LK Oder-Spree

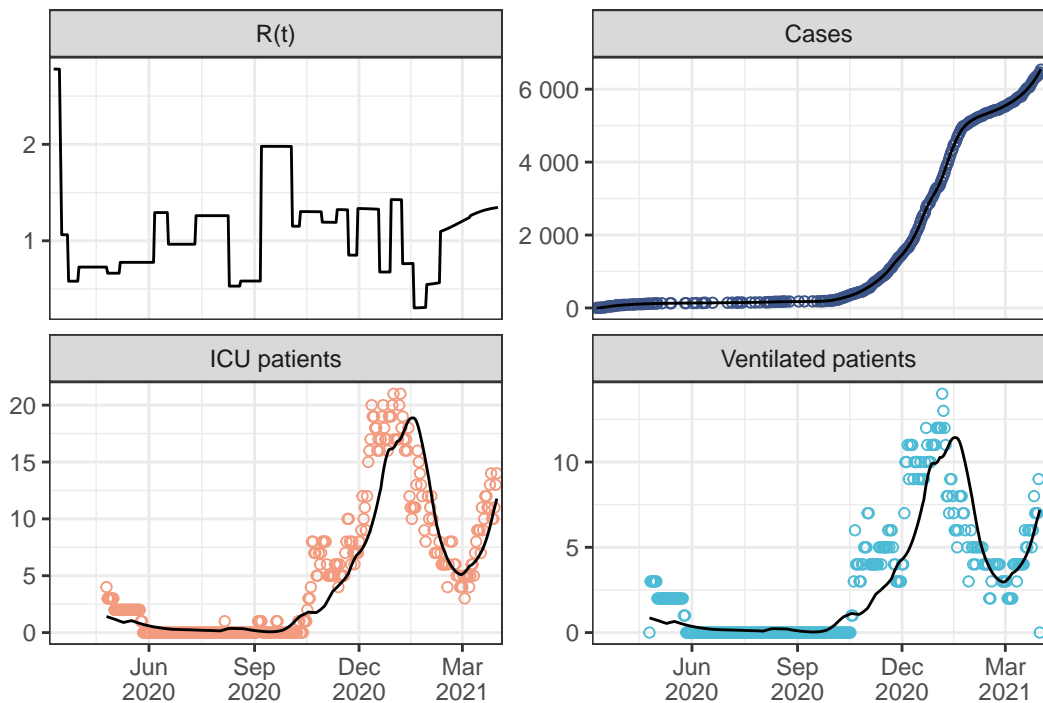

## LK Offenbach

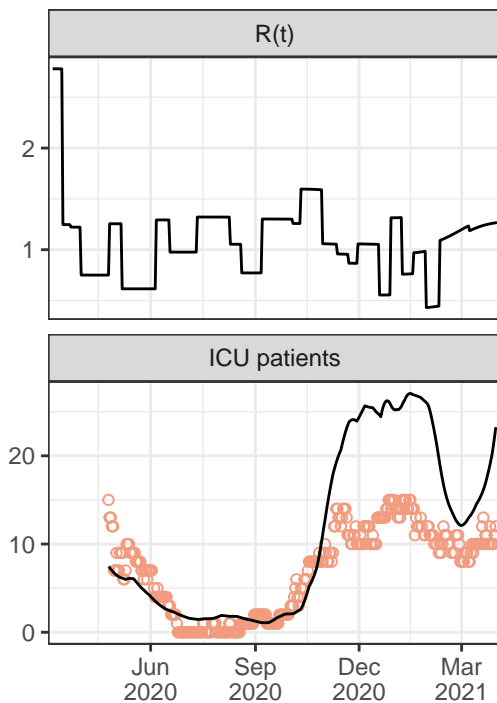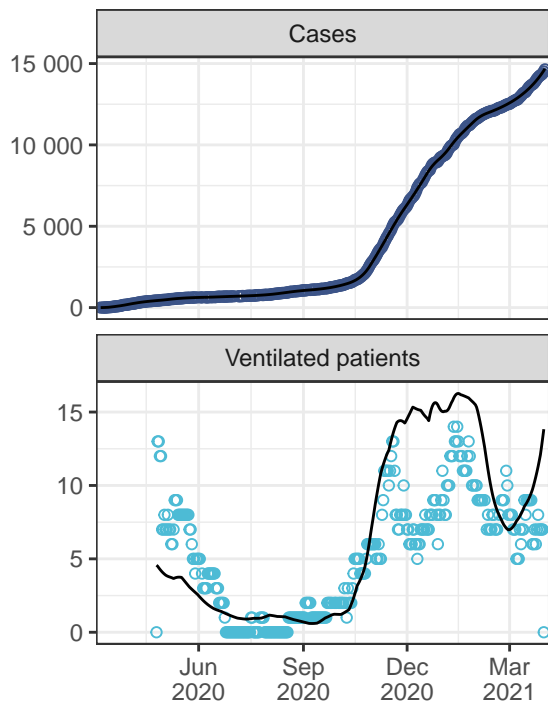

## LK Oldenburg

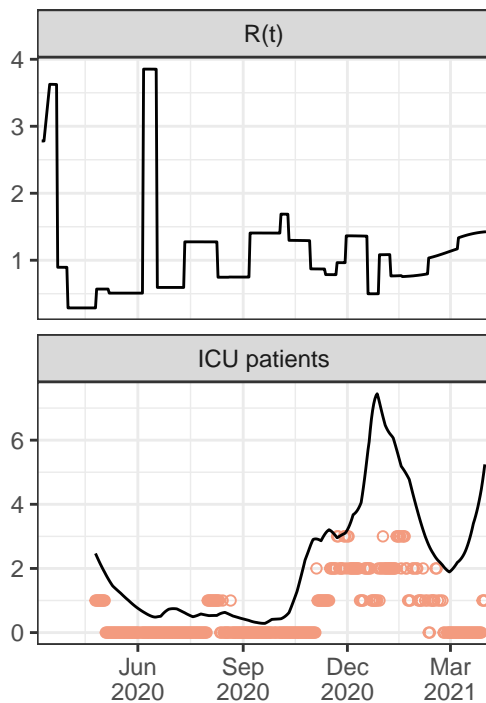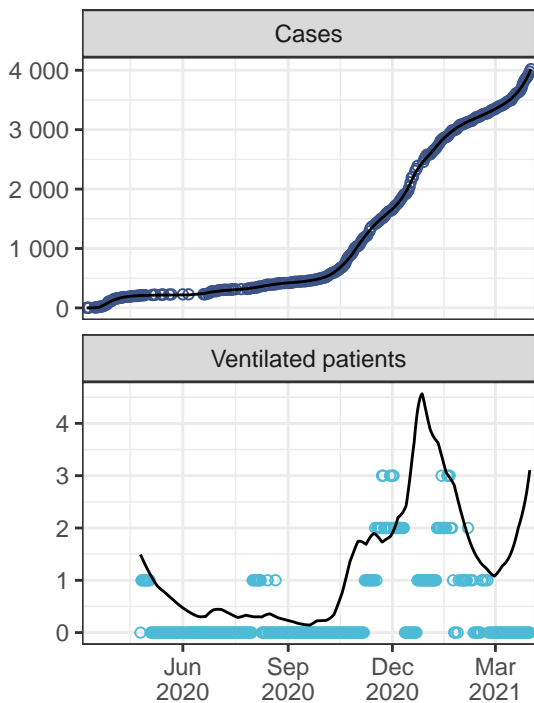

## LK Olpe

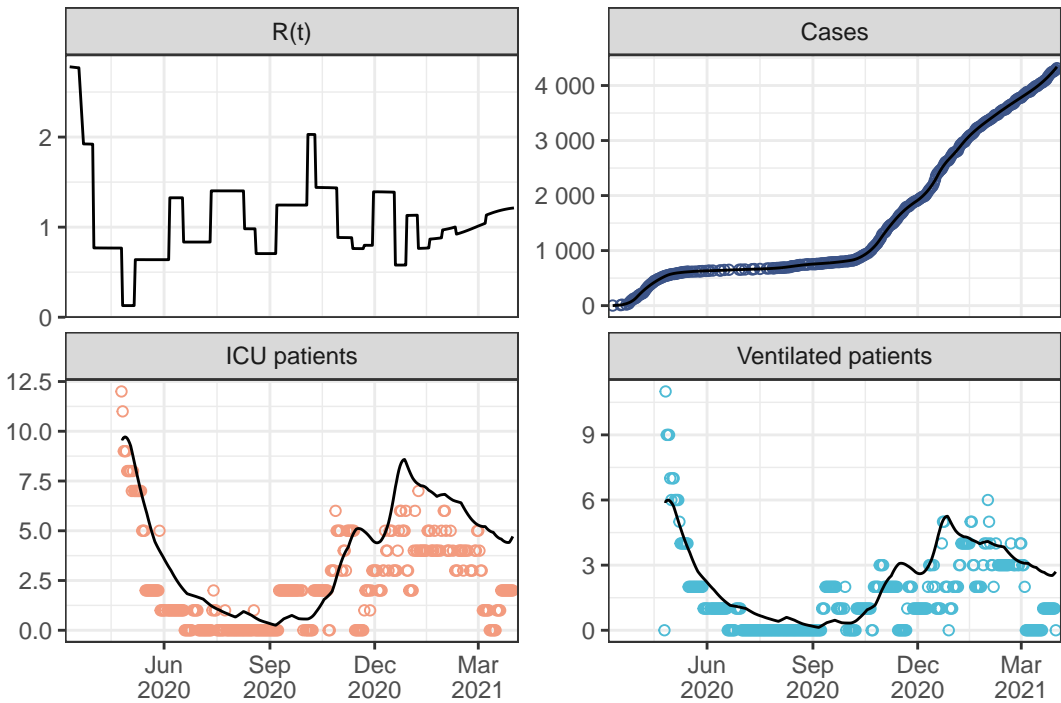

## LK Ortenaukreis

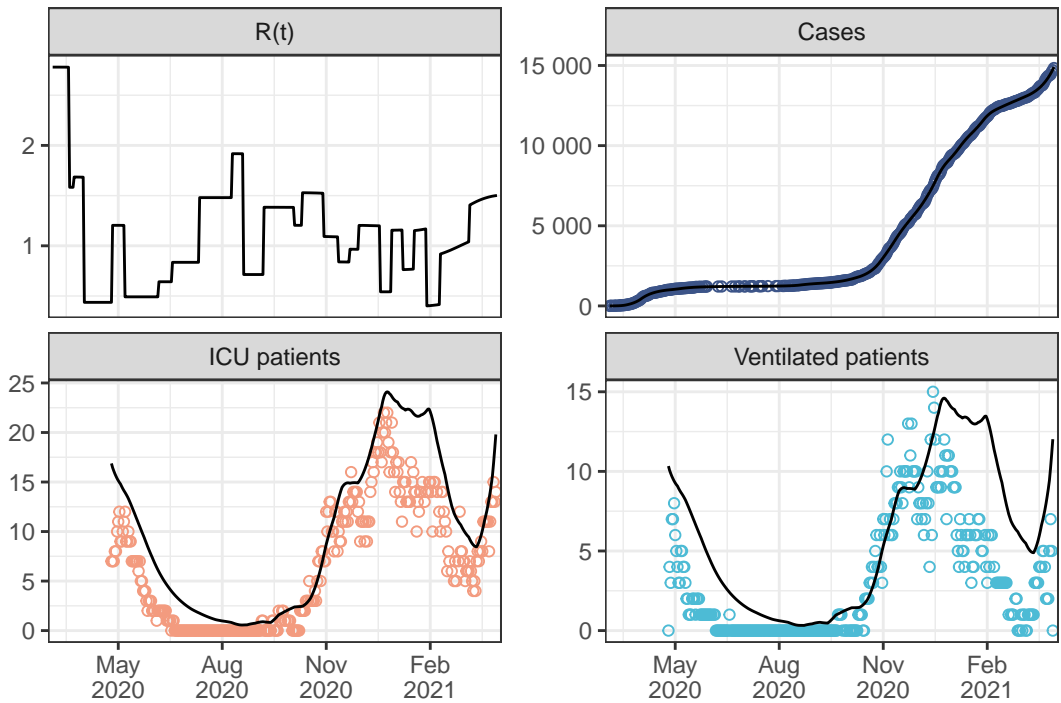

## LK Osnabrück

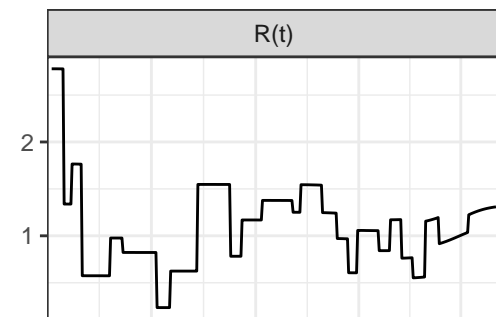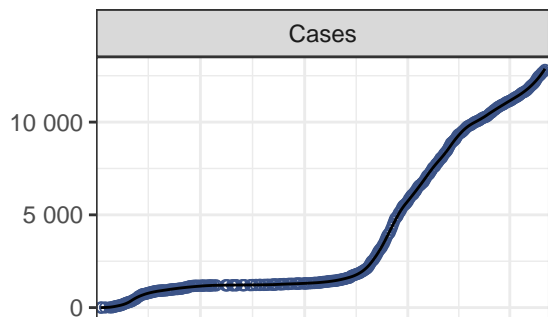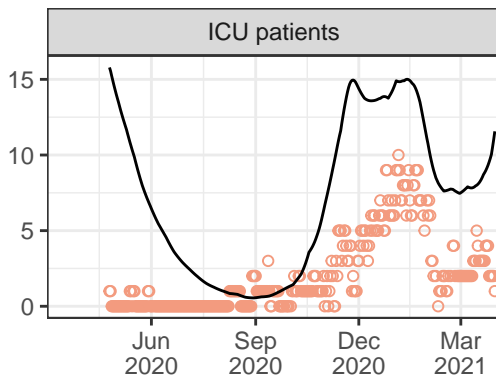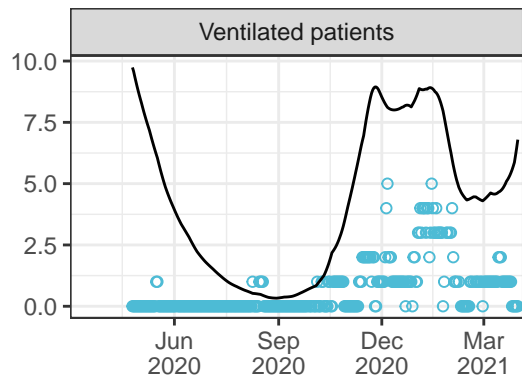

## LK Ostalbkreis

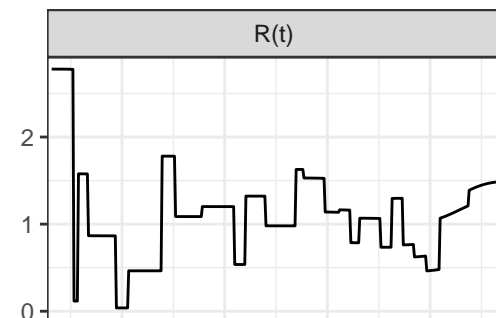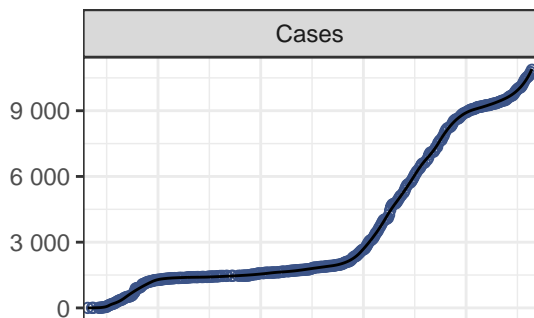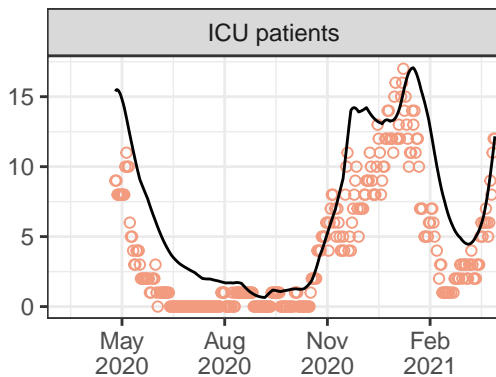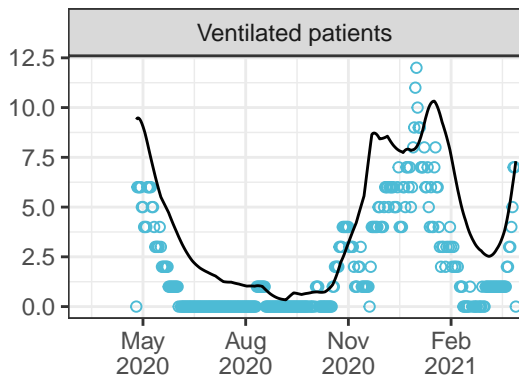

## LK Ostallgäu

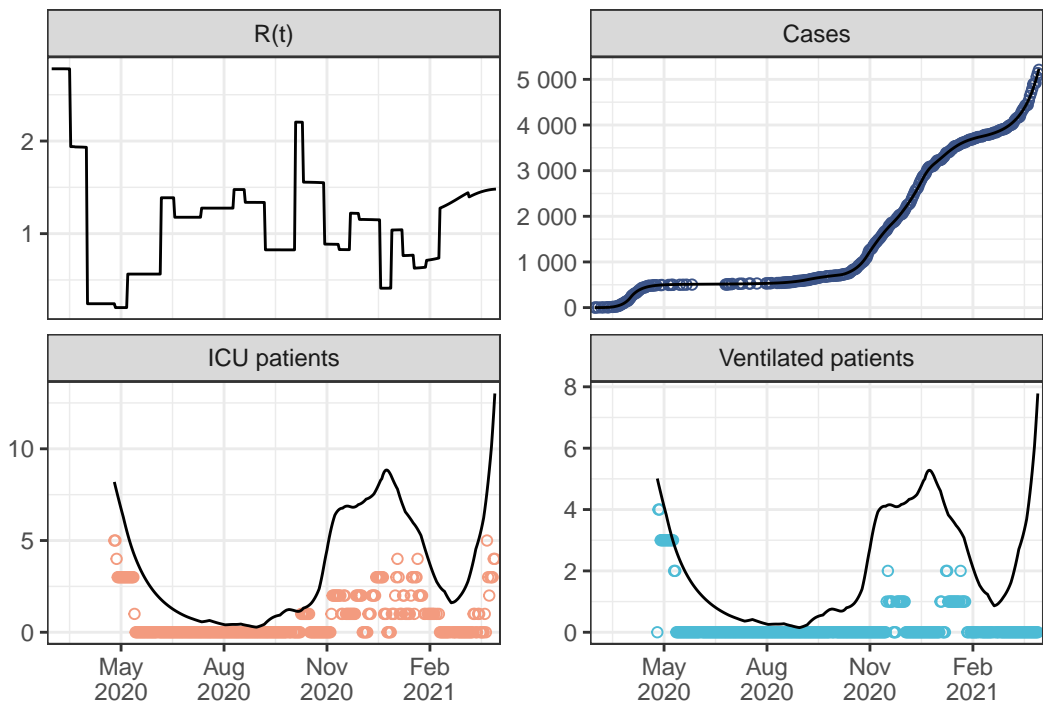

## LK Osterholz

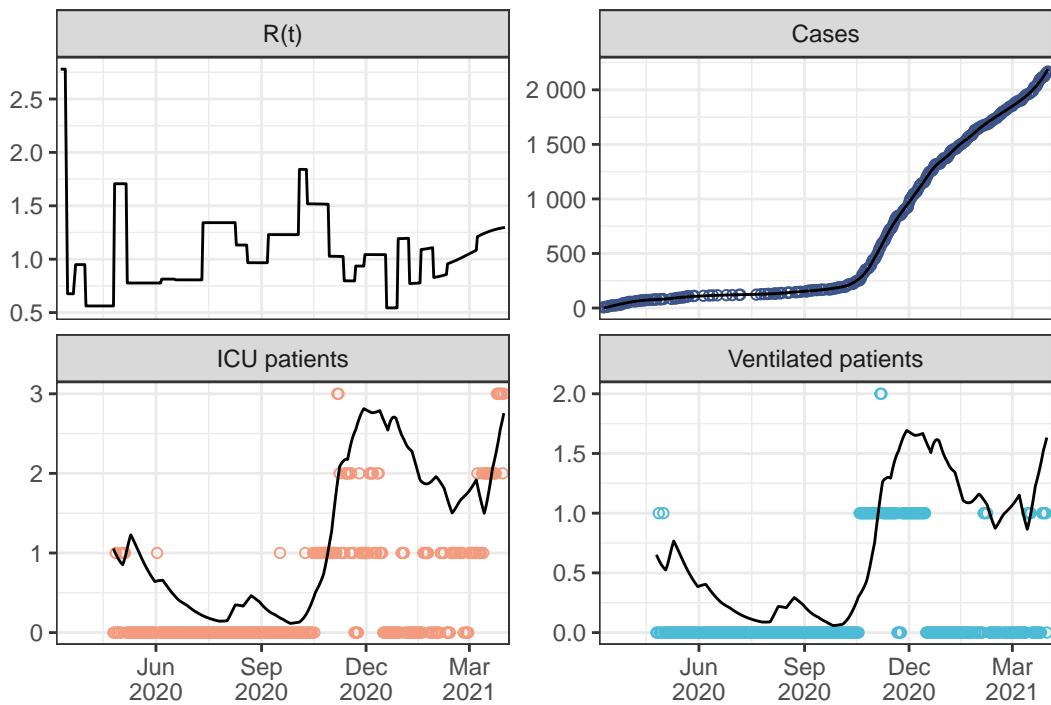

## LK Ostholstein

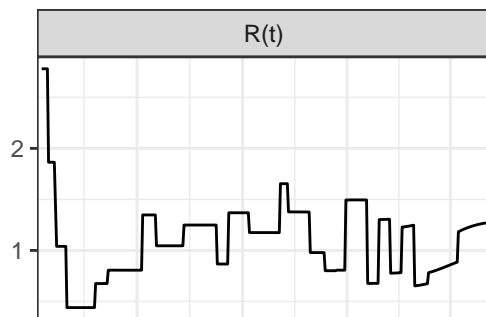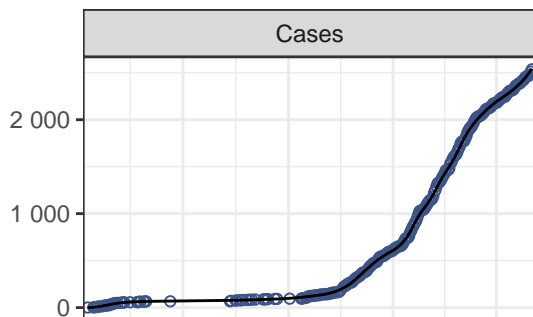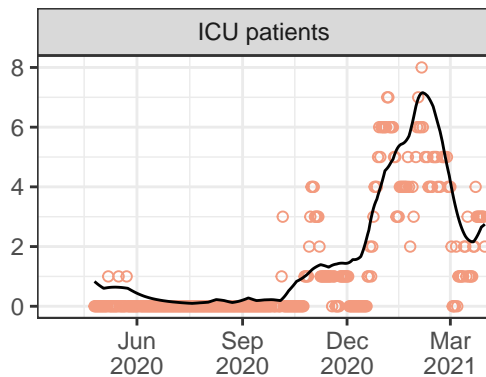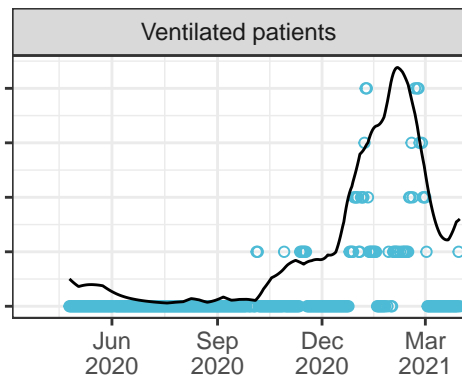

## LK Ostprignitz–Ruppin

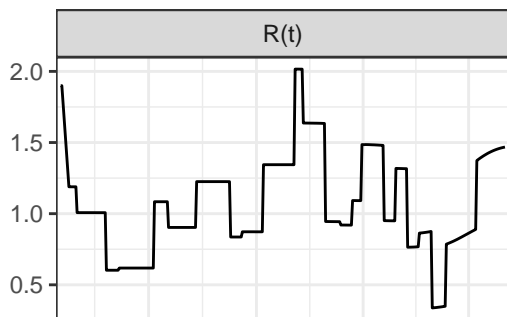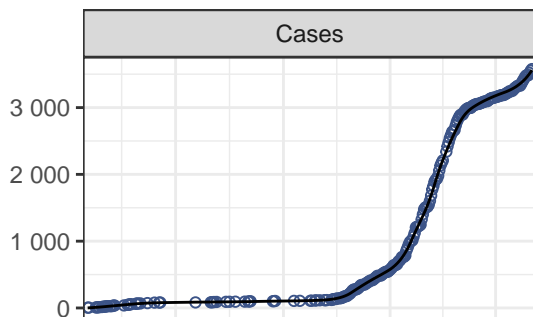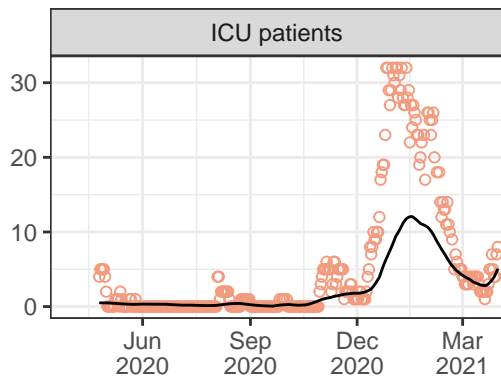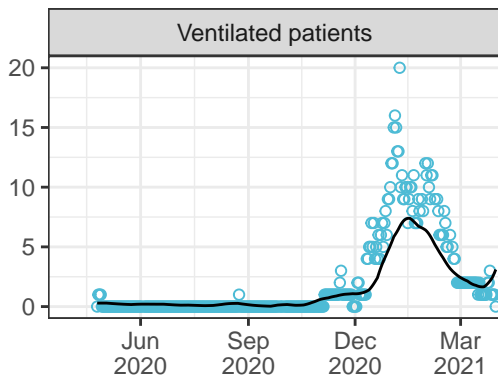

## LK Paderborn

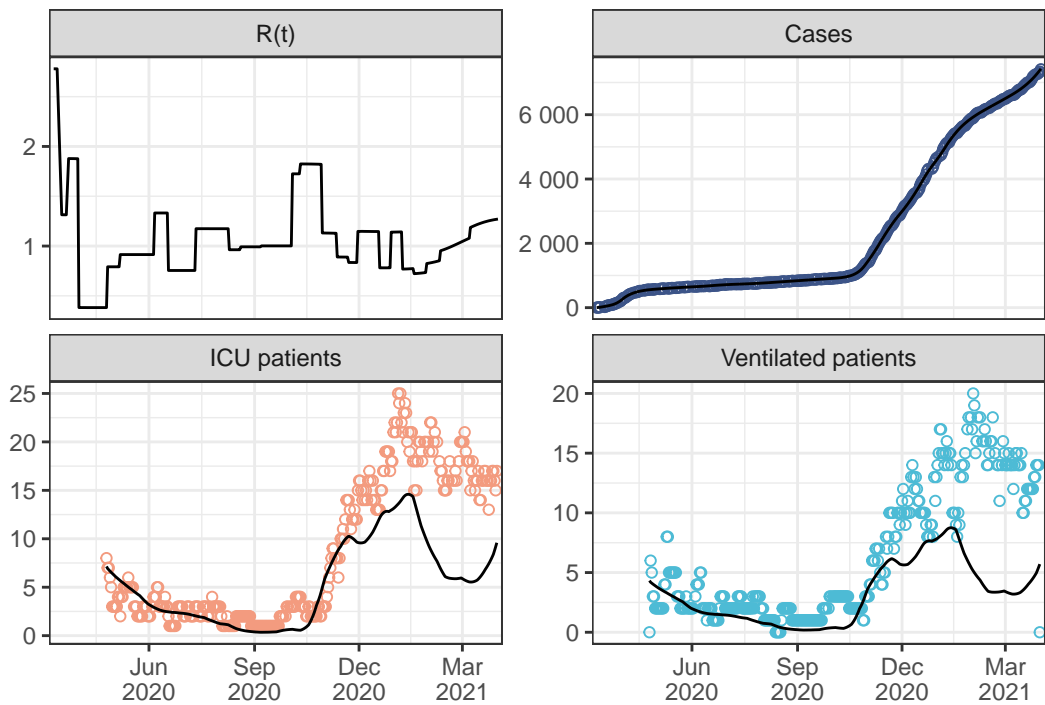

## LK Passau

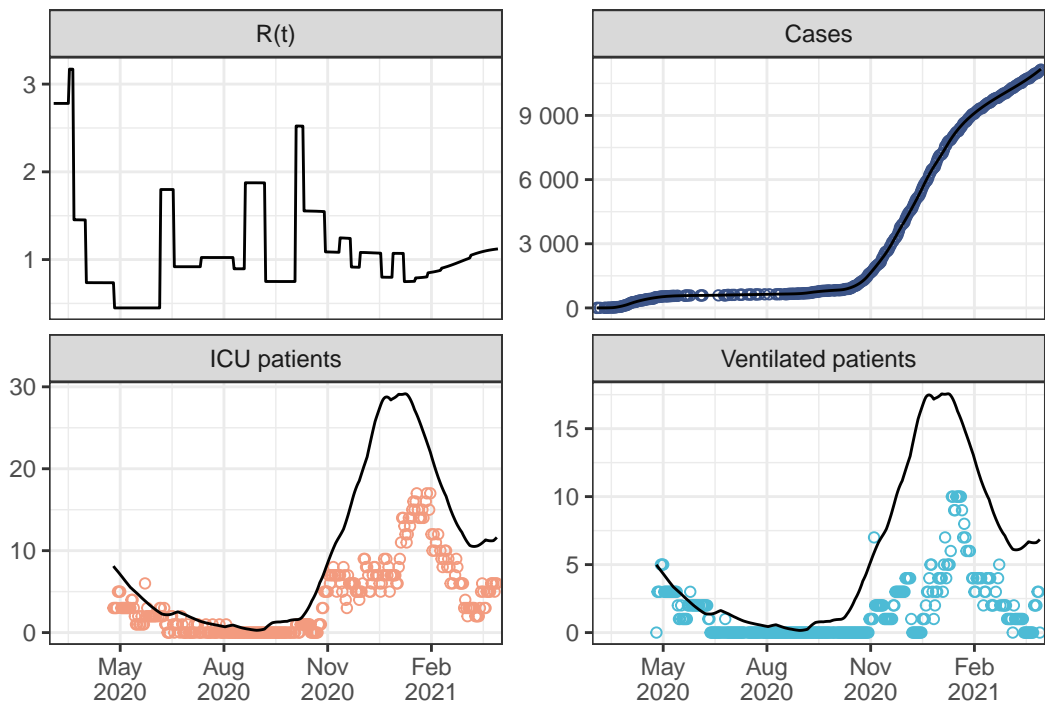

## LK Peine

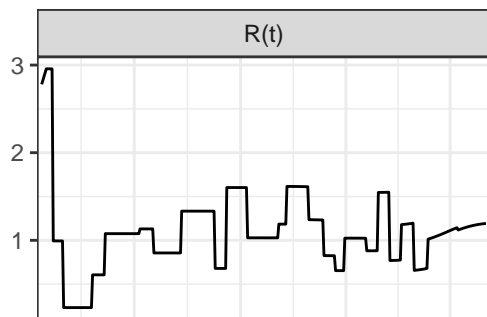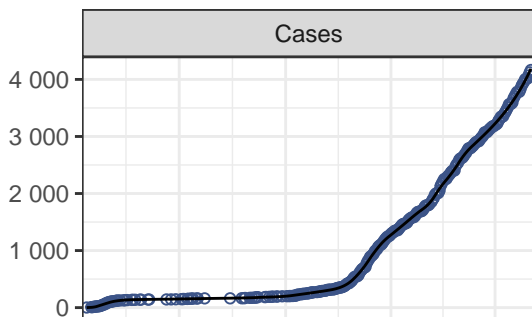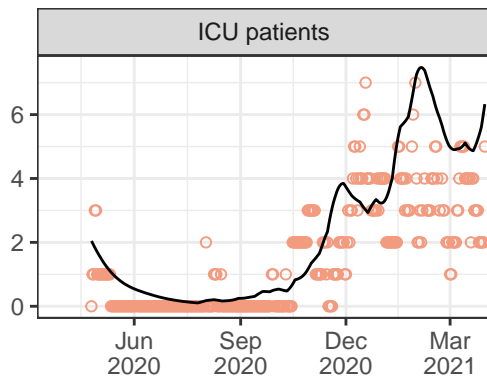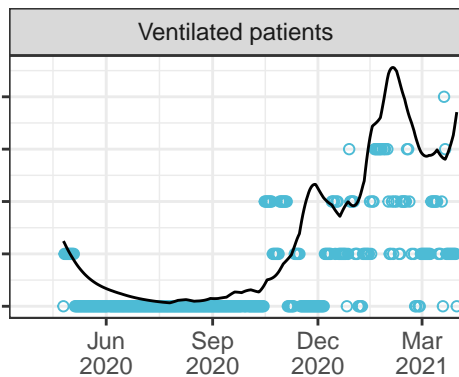

## LK Pfaffenhofen a.d. Ilm

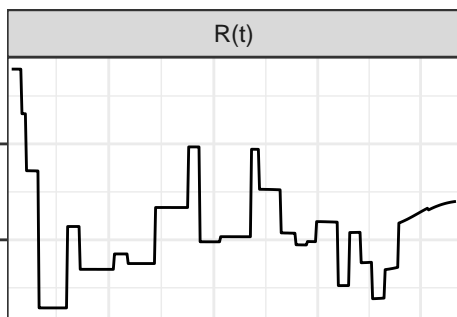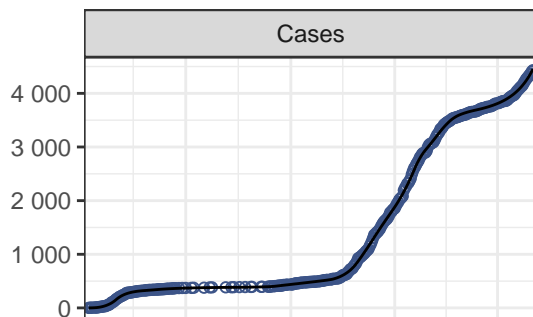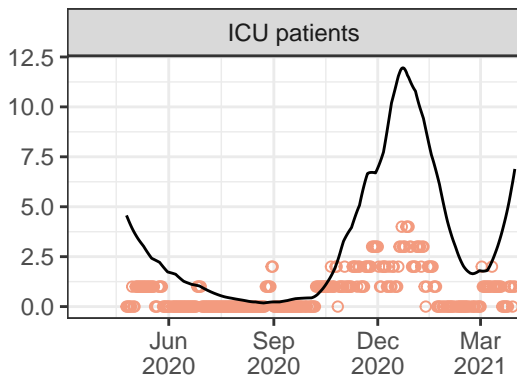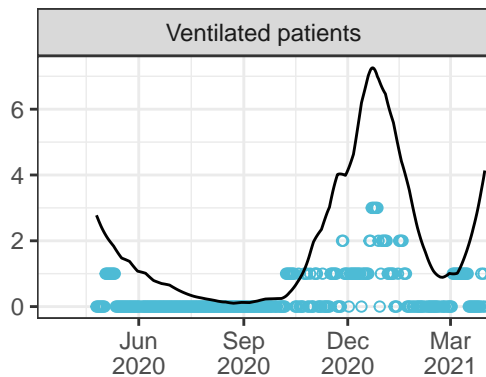

## LK Pinneberg

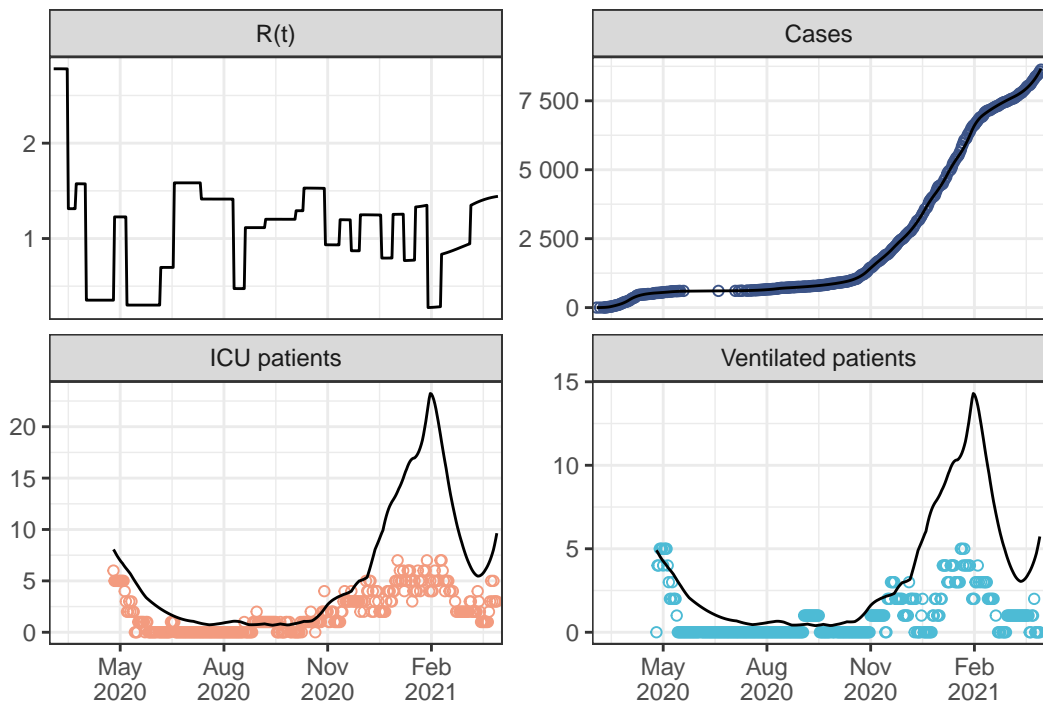

## LK Plön

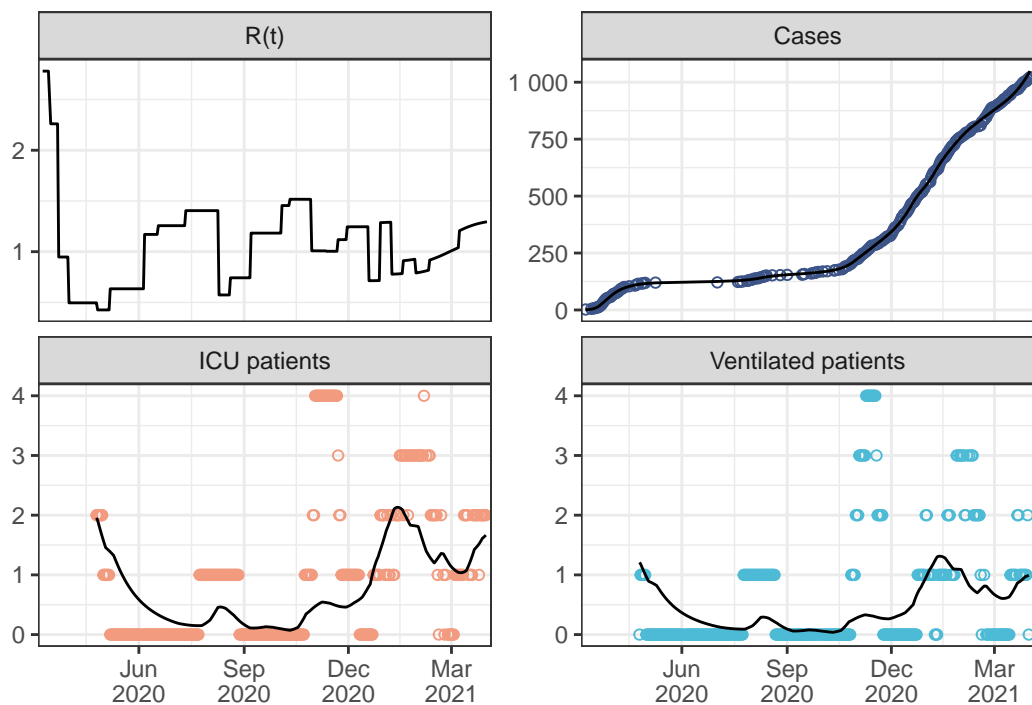

## LK Potsdam–Mittelmark

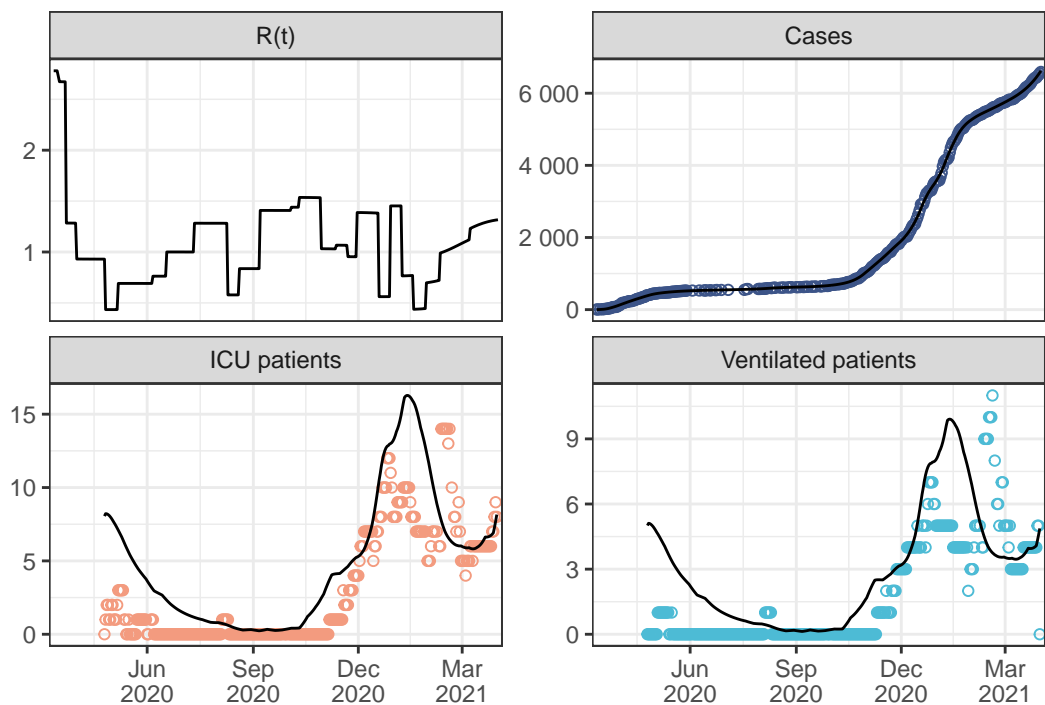

## LK Prignitz

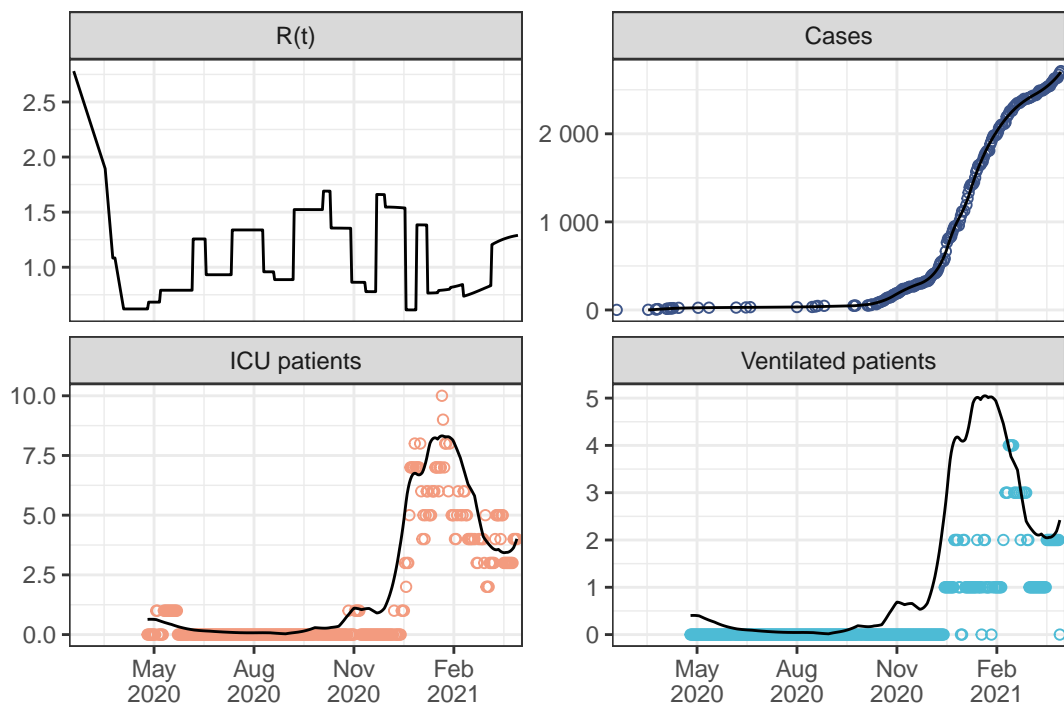

## LK Rastatt

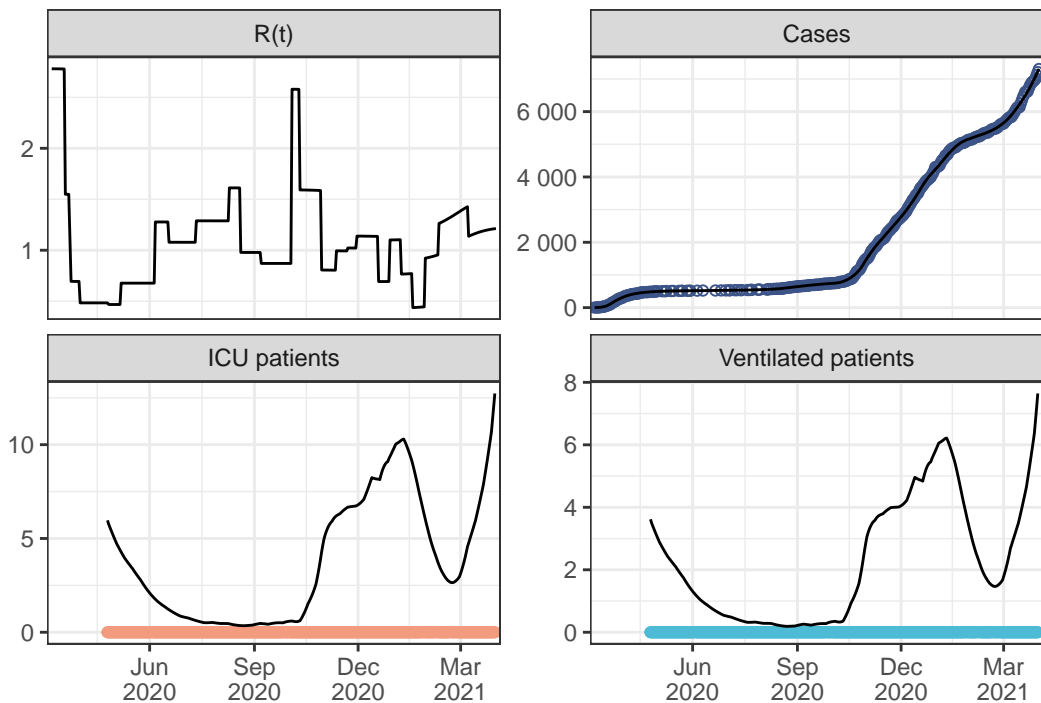

## LK Ravensburg

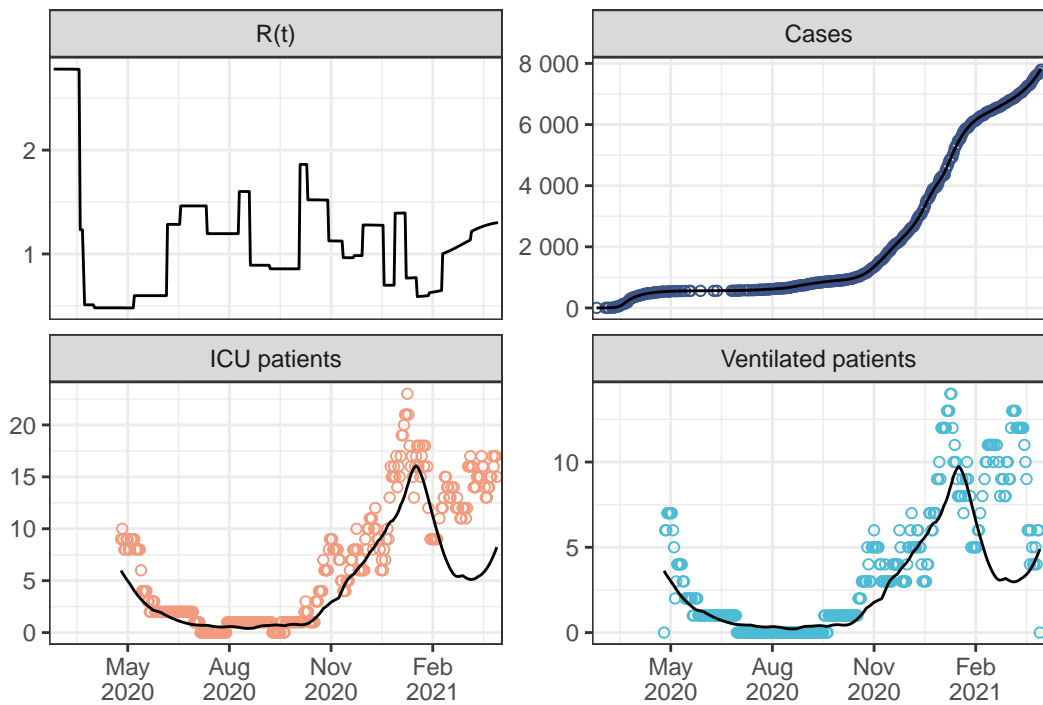

## LK Recklinghausen

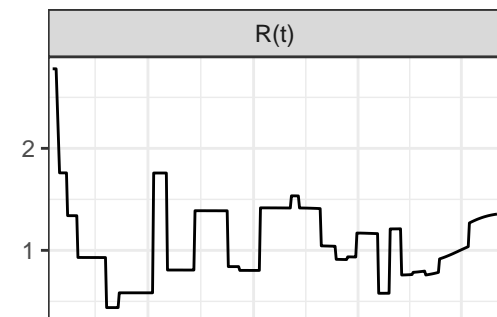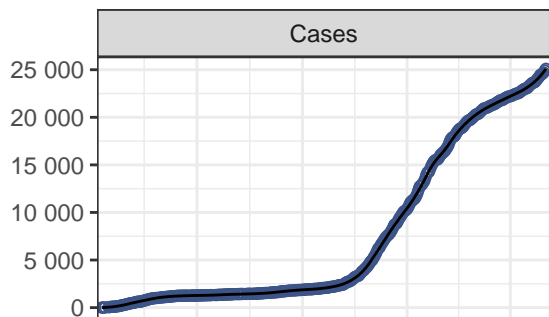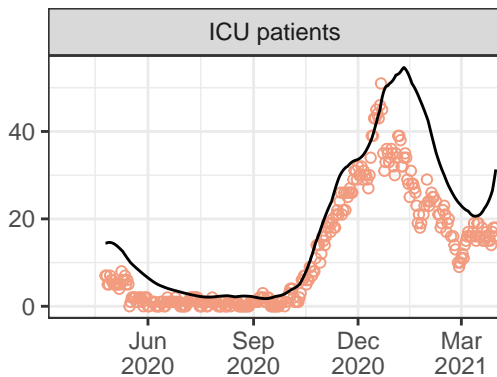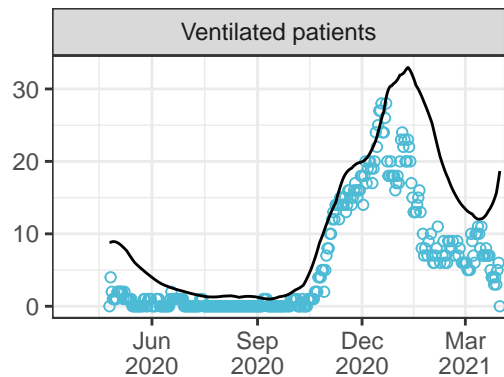

## LK Regen

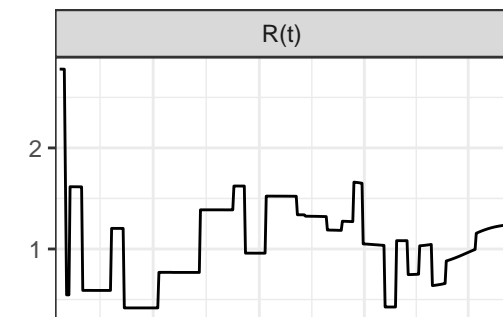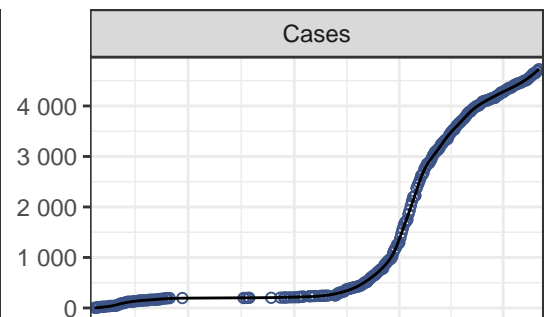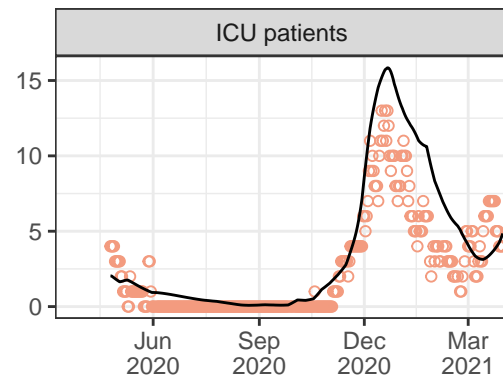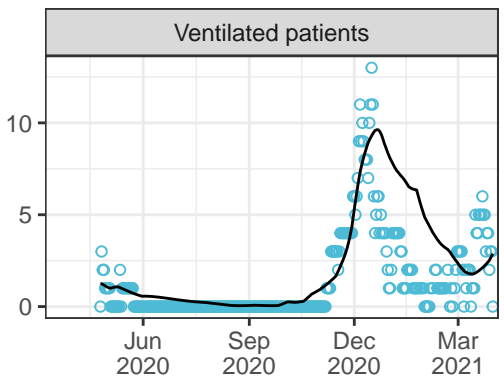

## LK Regensburg

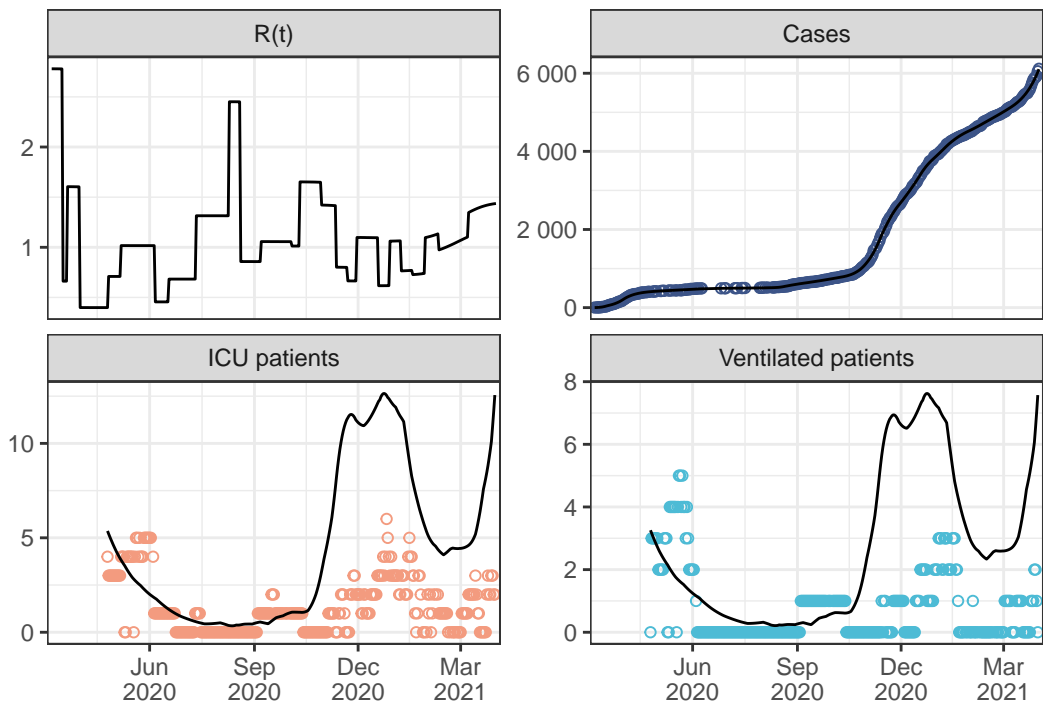

## LK Rems-Murr-Kreis

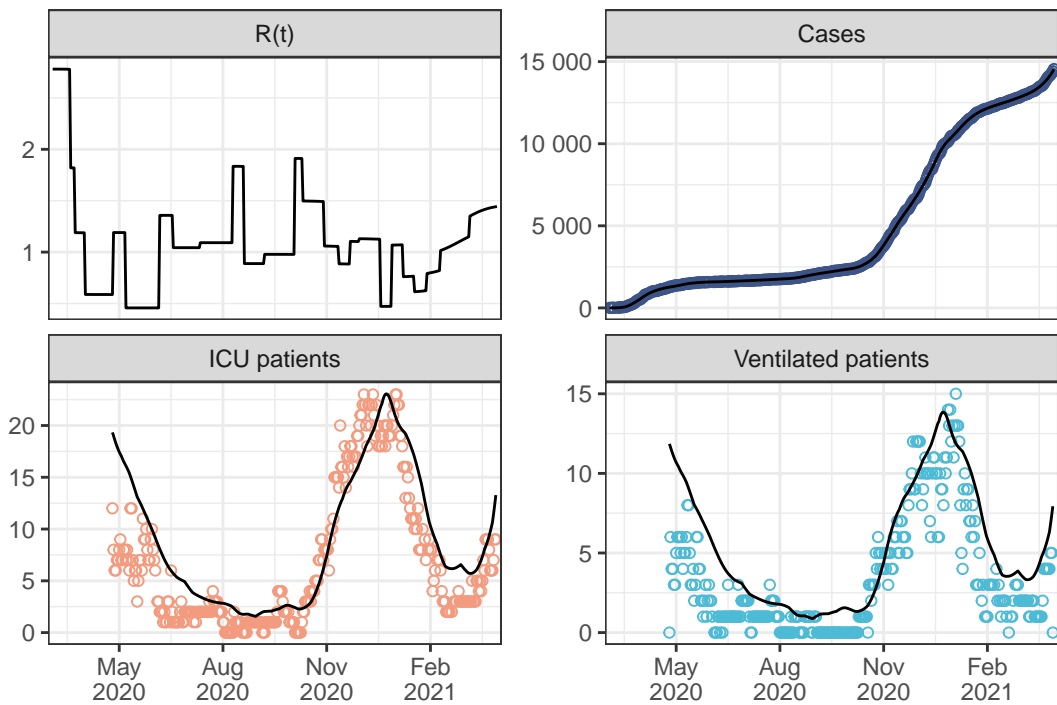

## LK Rendsburg–Eckernförde

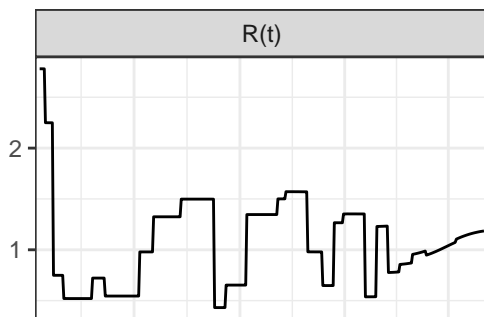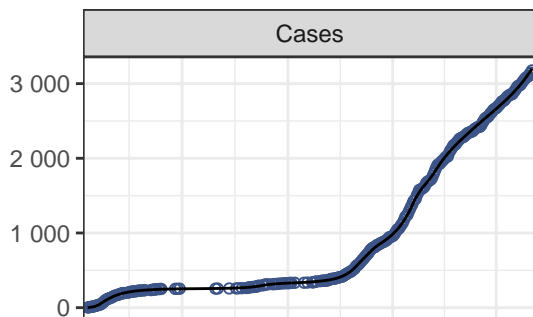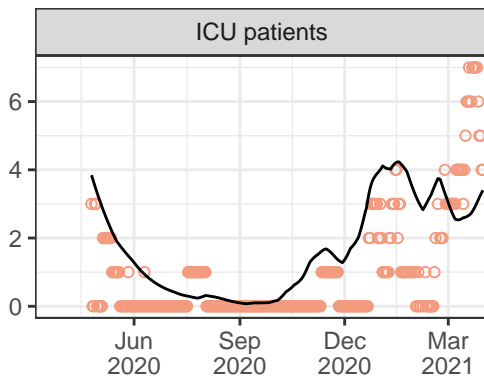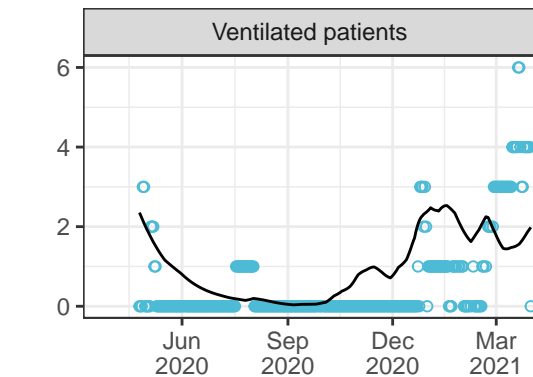

## LK Reutlingen

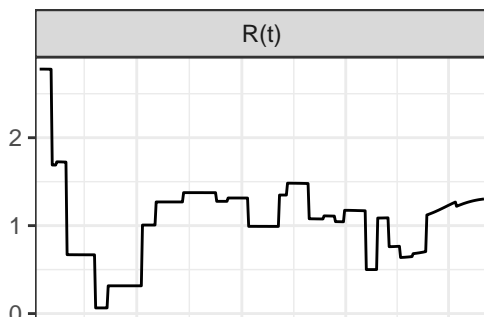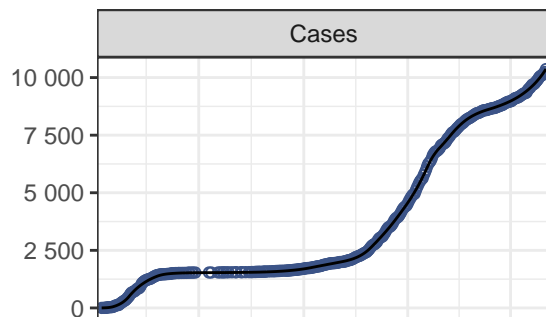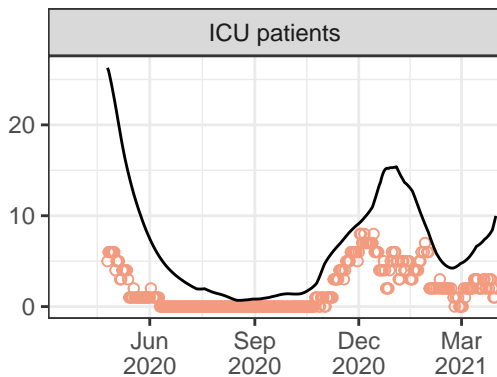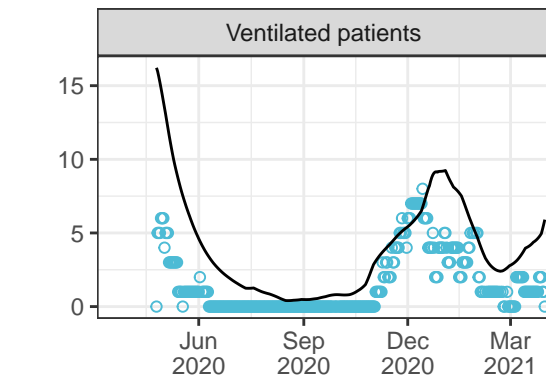

## LK Rhein-Erft-Kreis

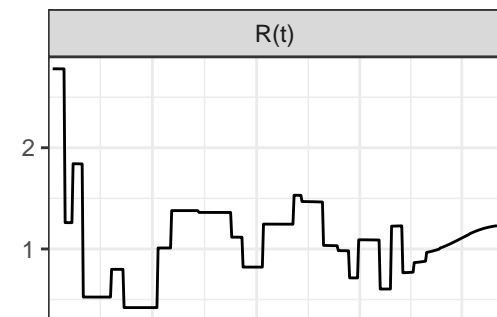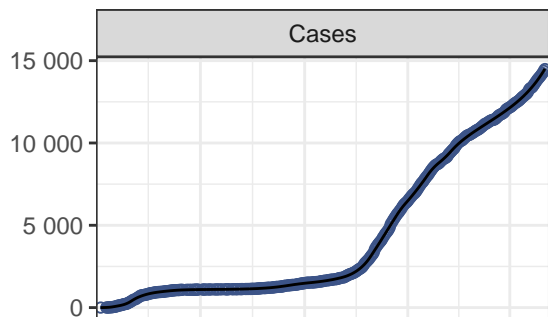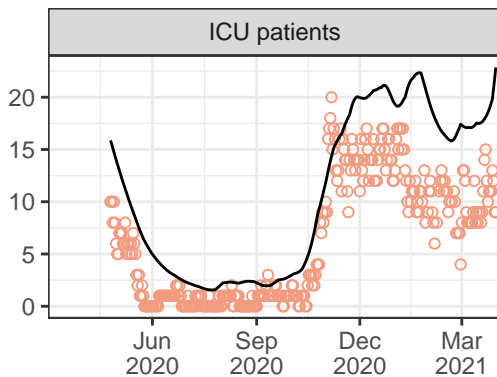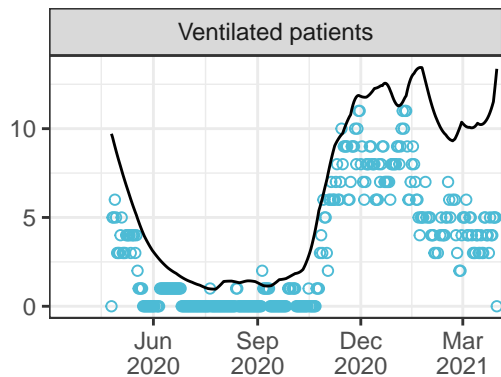

## LK Rhein-Hunsrück-Kreis

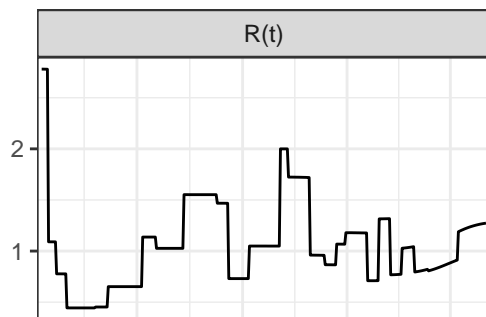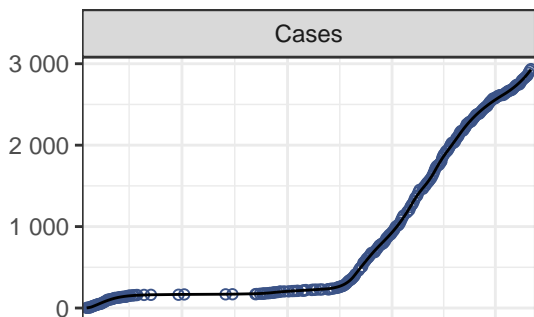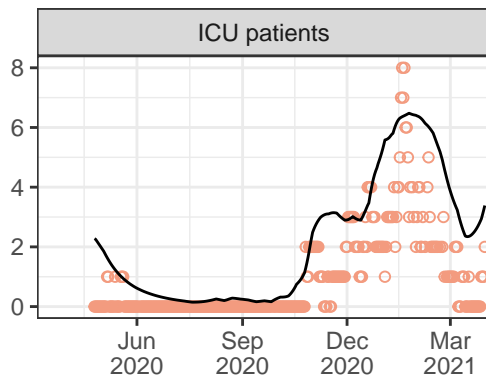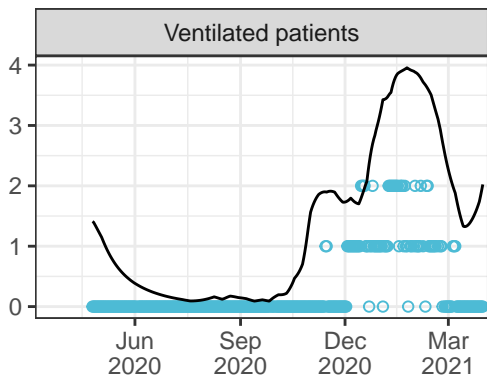

## LK Rhein–Kreis Neuss

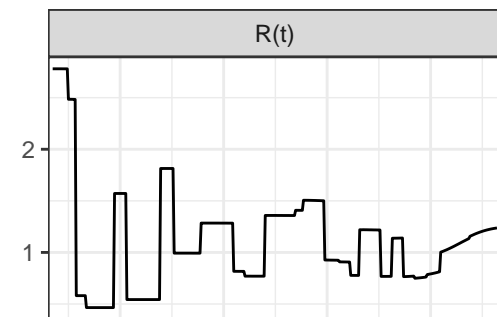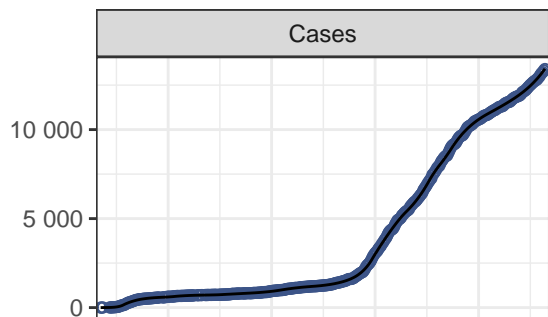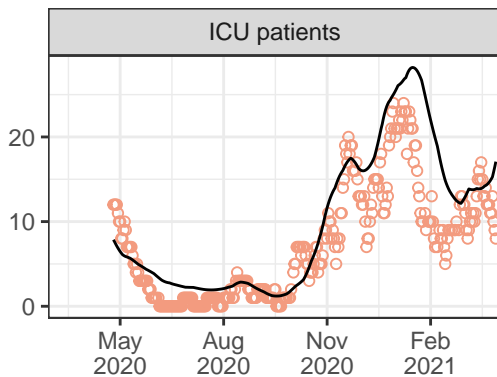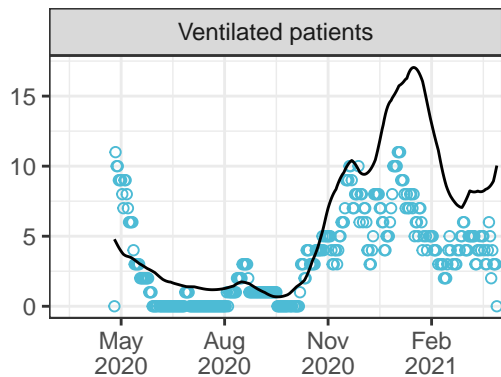

## LK Rhein–Lahn–Kreis

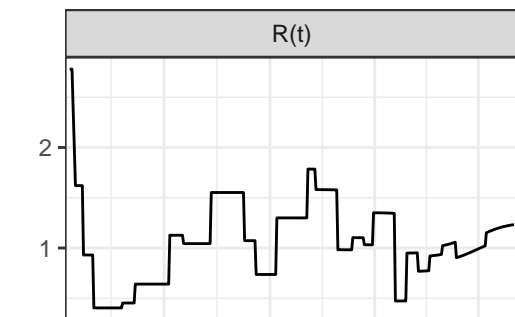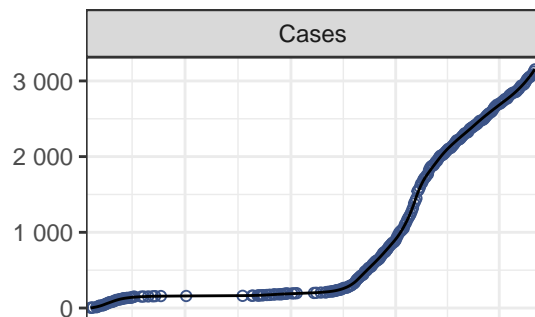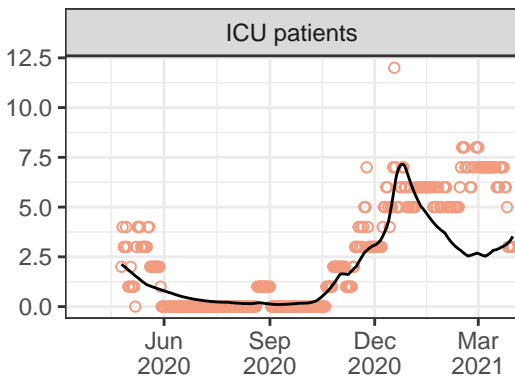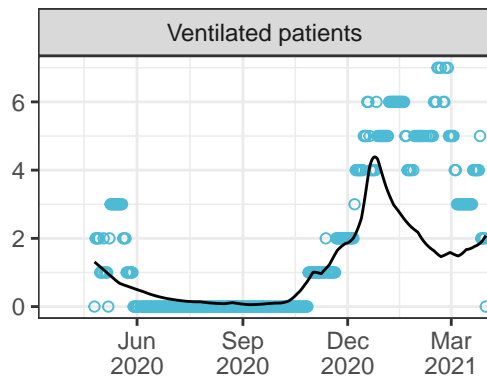

## LK Rhein-Neckar-Kreis

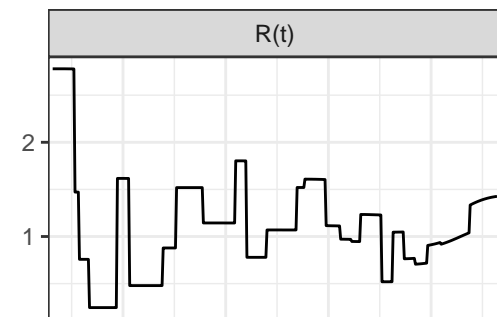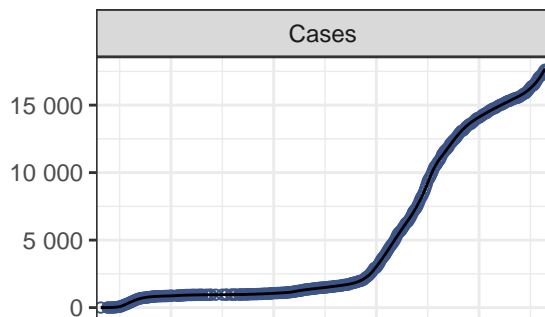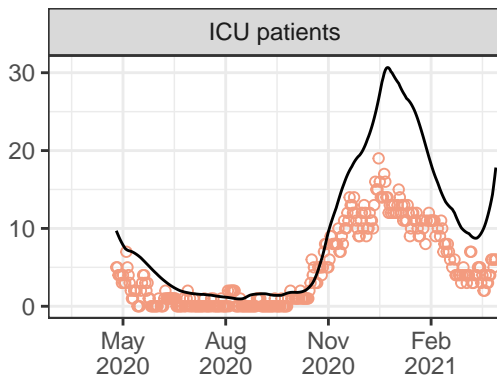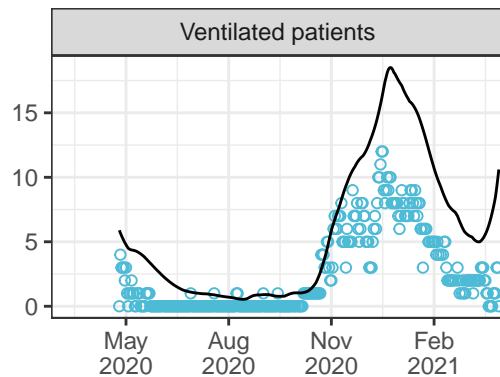

## LK Rhein-Pfalz-Kreis

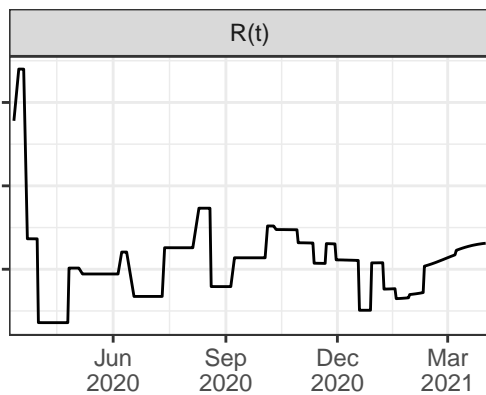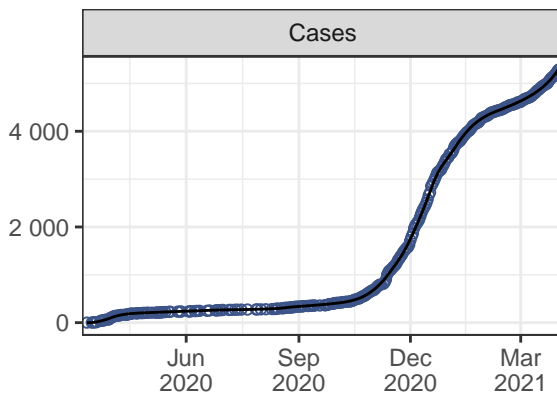

## LK Rhein–Sieg–Kreis

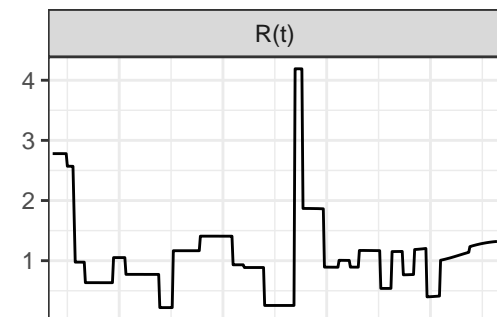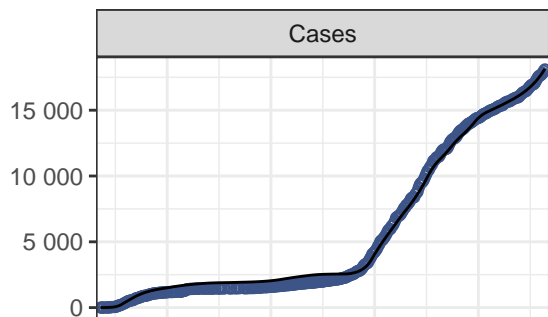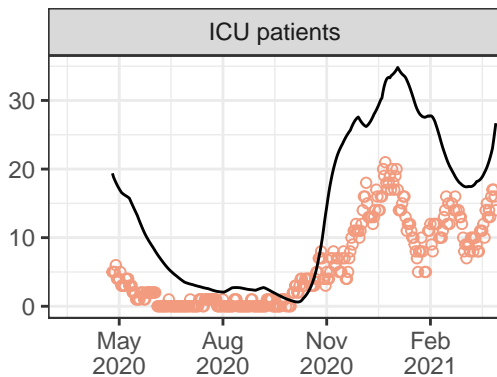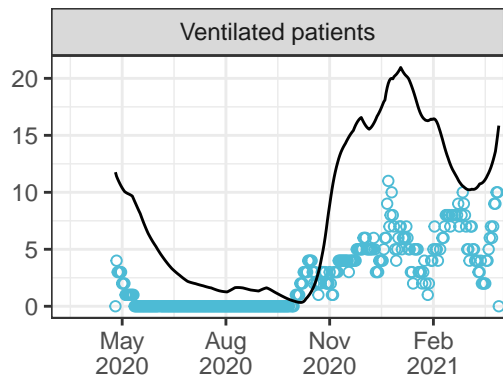

## LK Rheingau–Taunus–Kreis

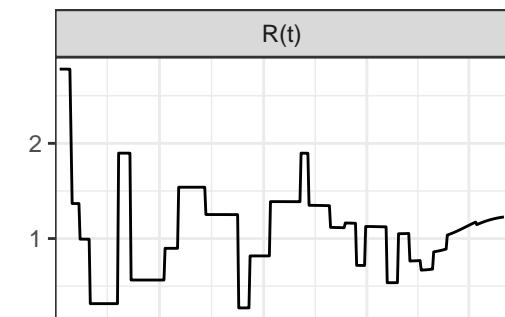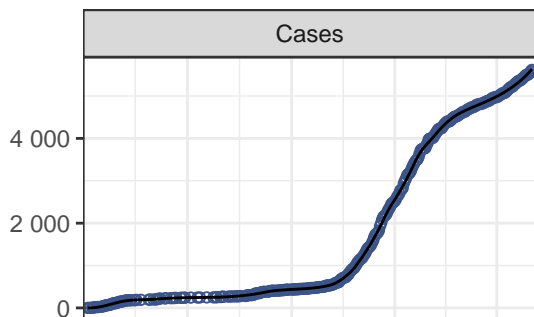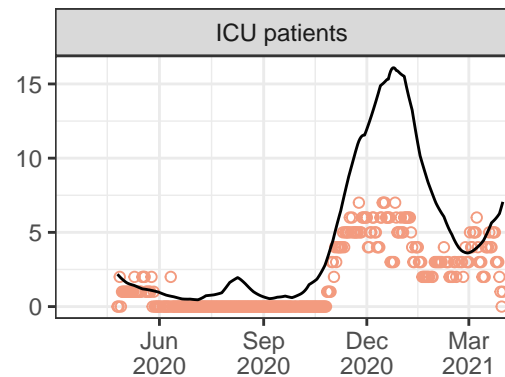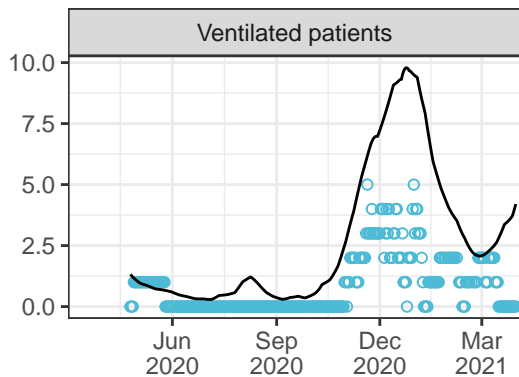

## LK Rheinisch-Bergischer Kreis

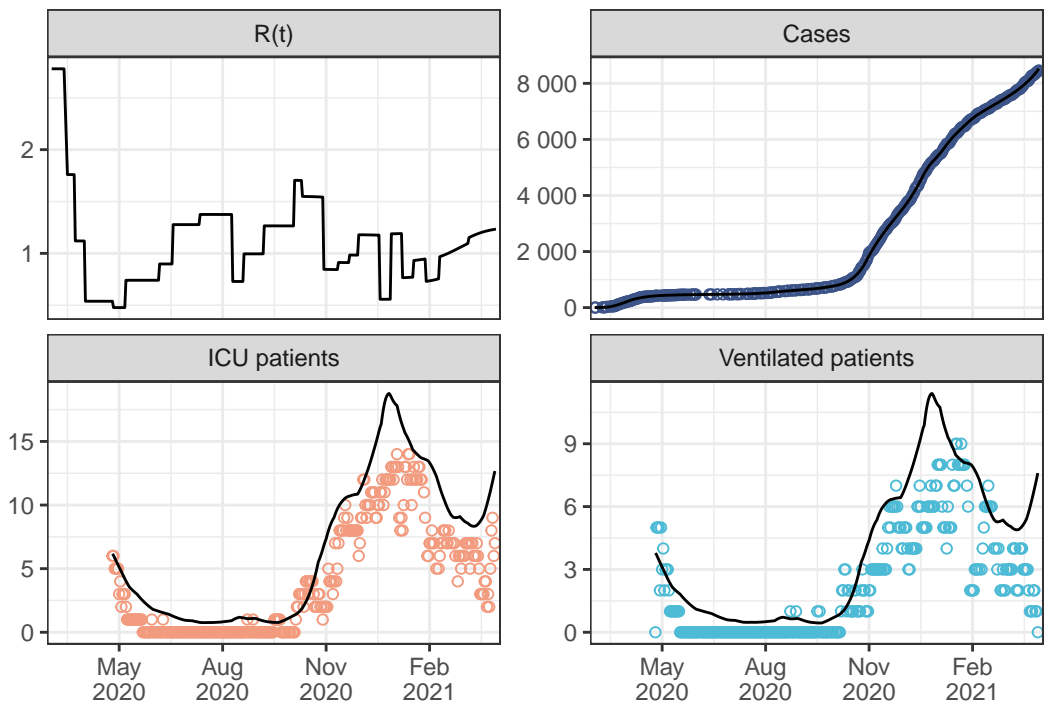

## LK Rhön-Grabfeld

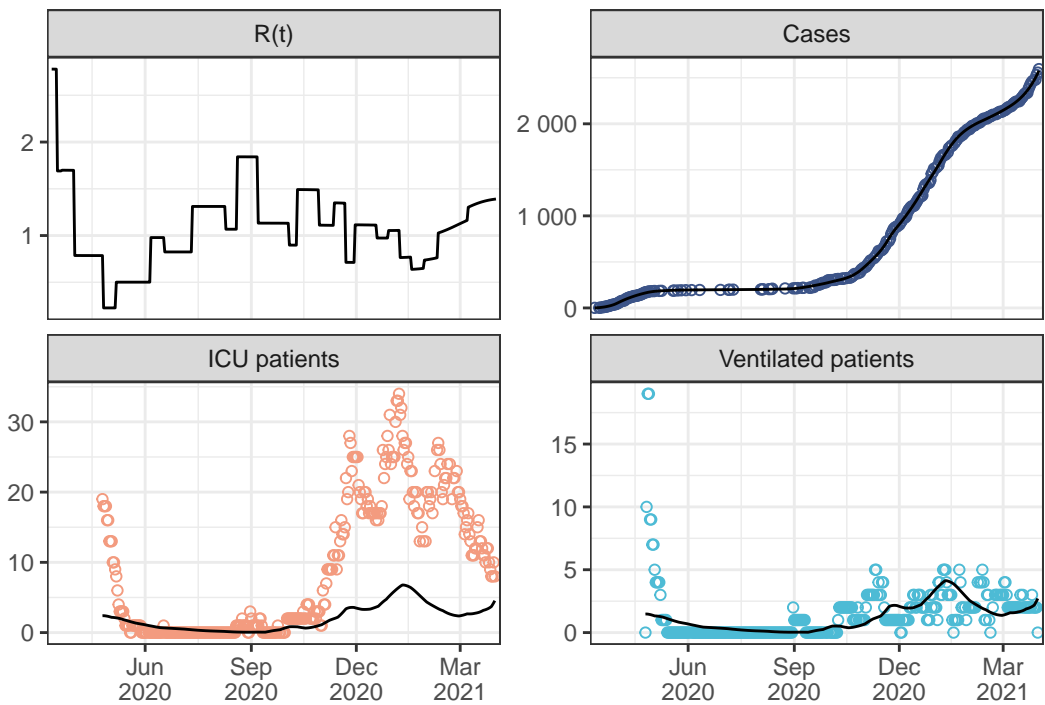

## LK Rosenheim

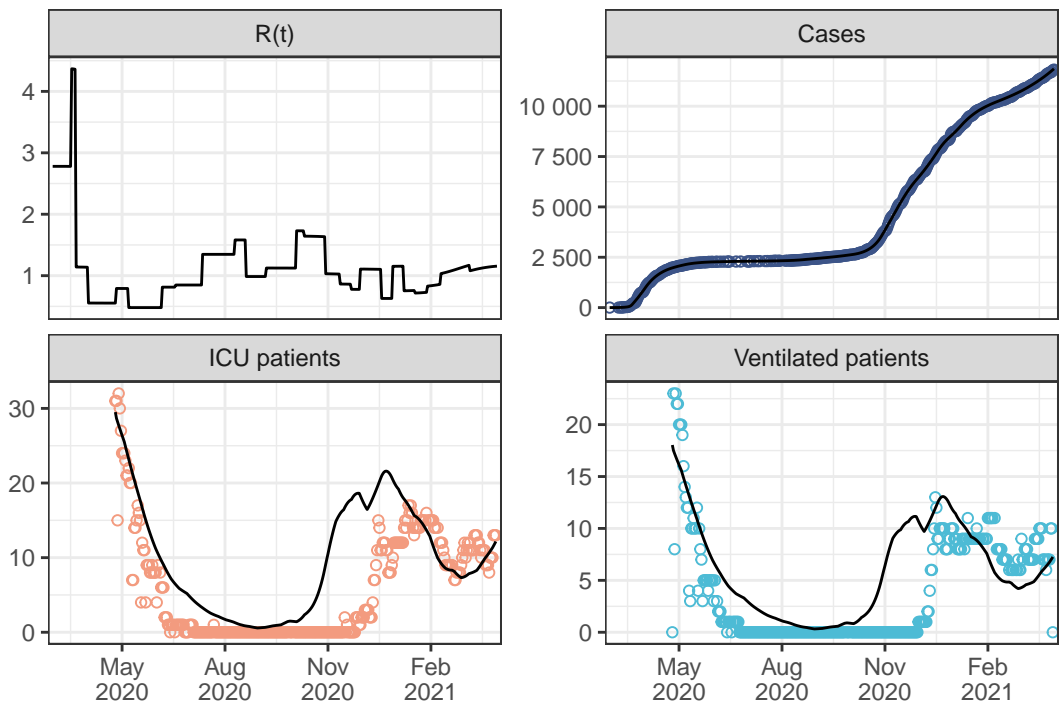

## LK Rostock

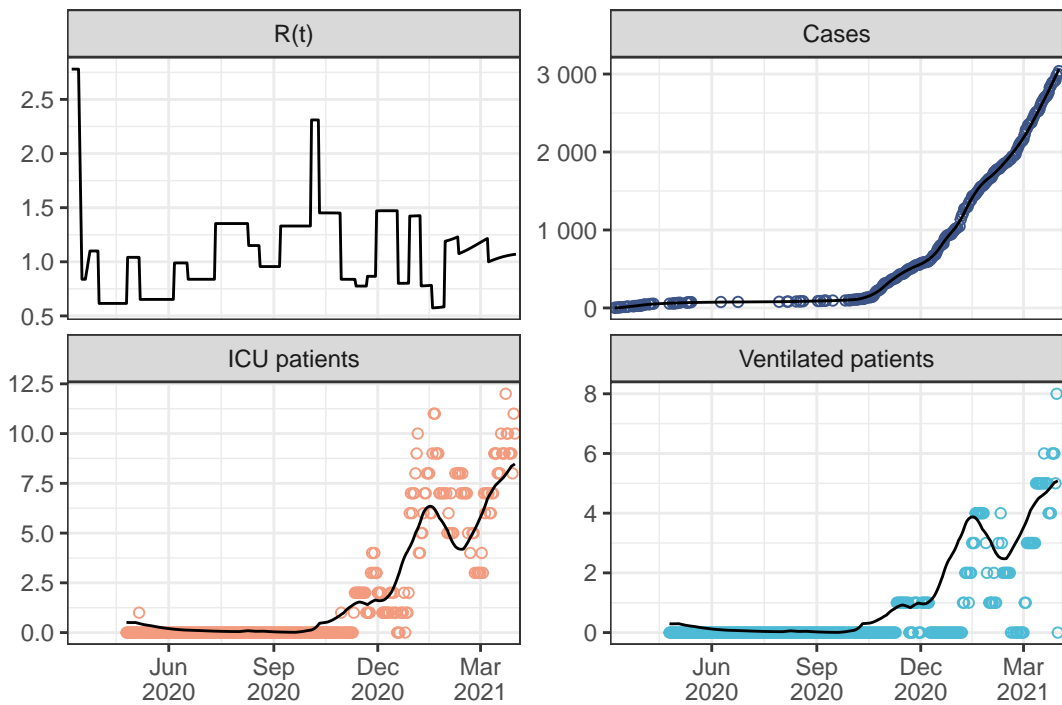

## LK Rotenburg (Wümme)

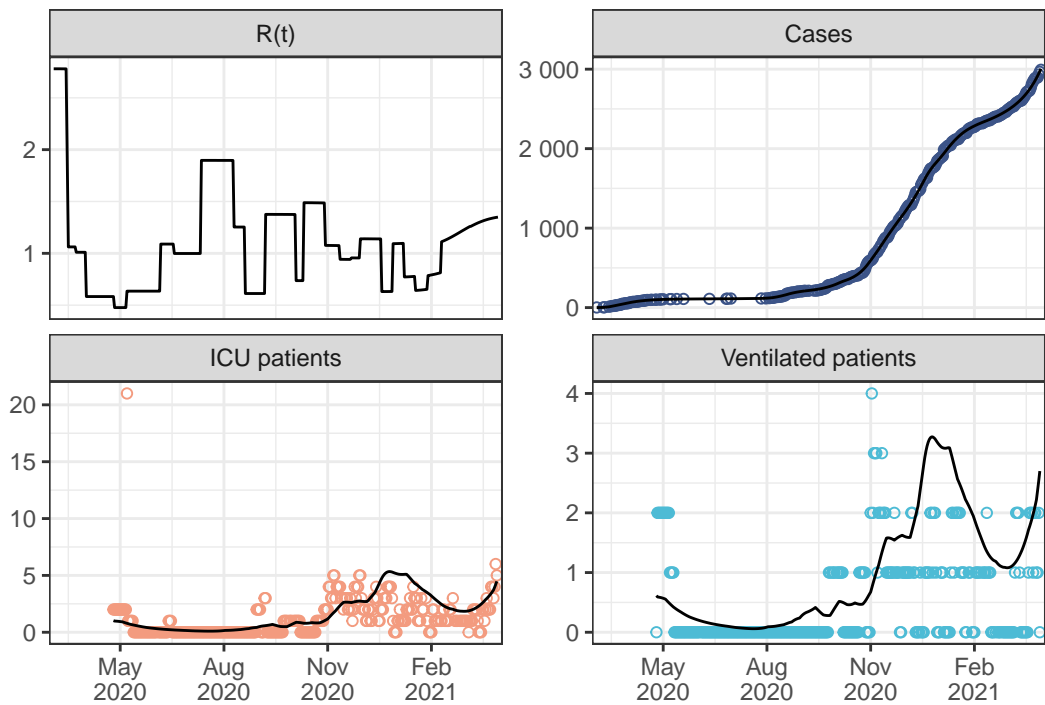

## LK Roth

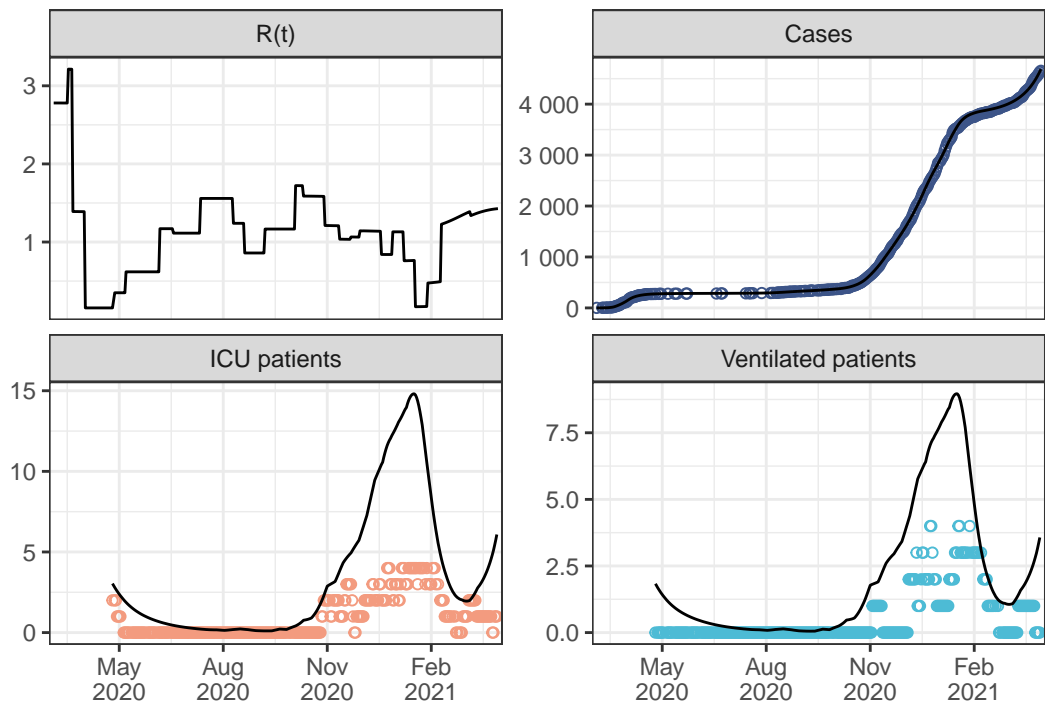

## LK Rottal-Inn

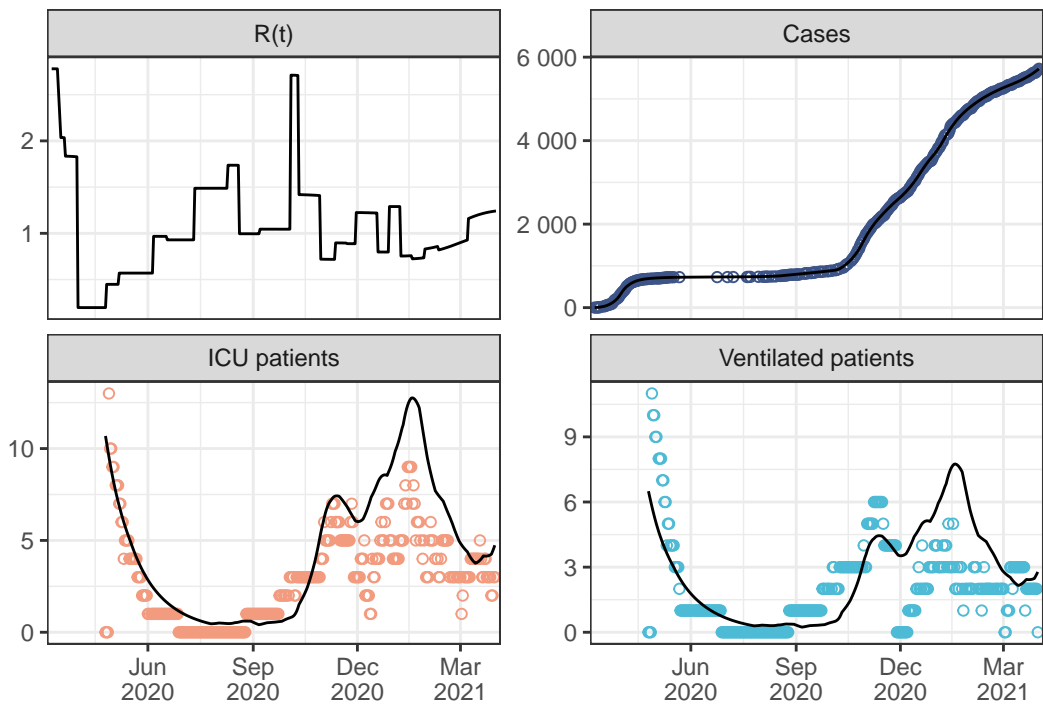

## LK Rottweil

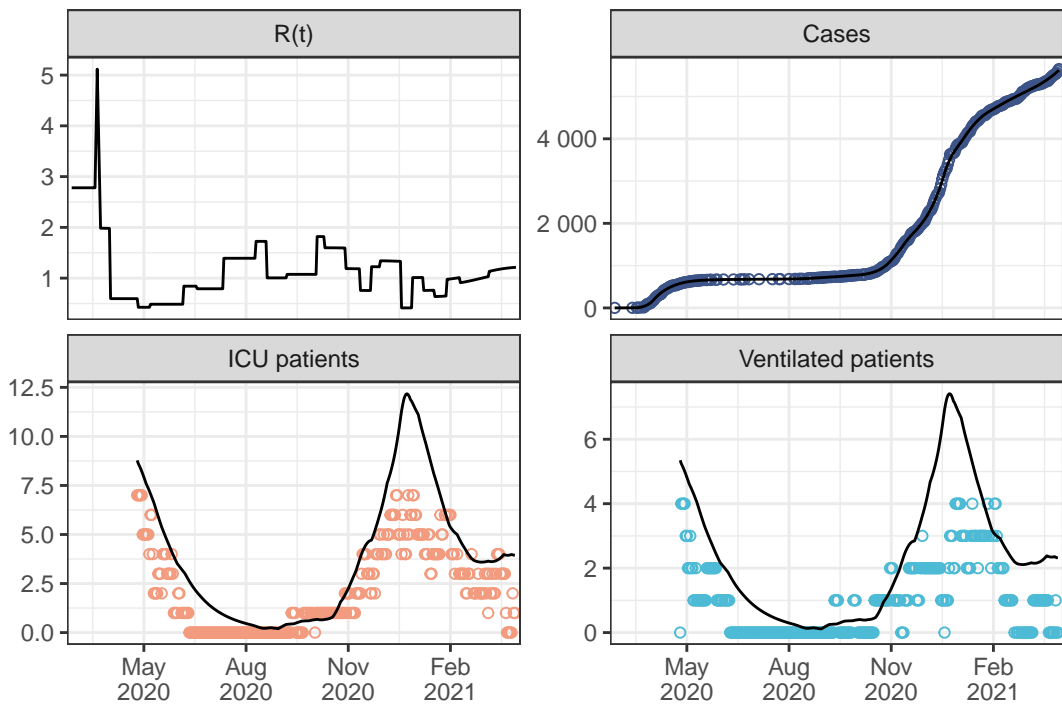

## LK Saale–Holzland–Kreis

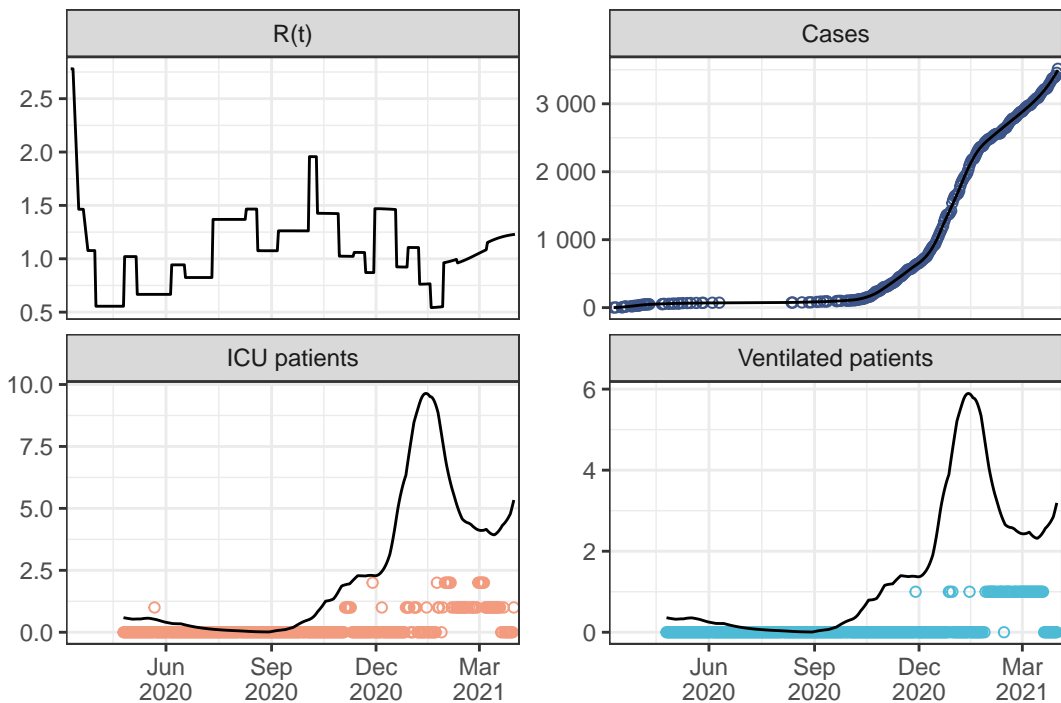

## LK Saale–Orla–Kreis

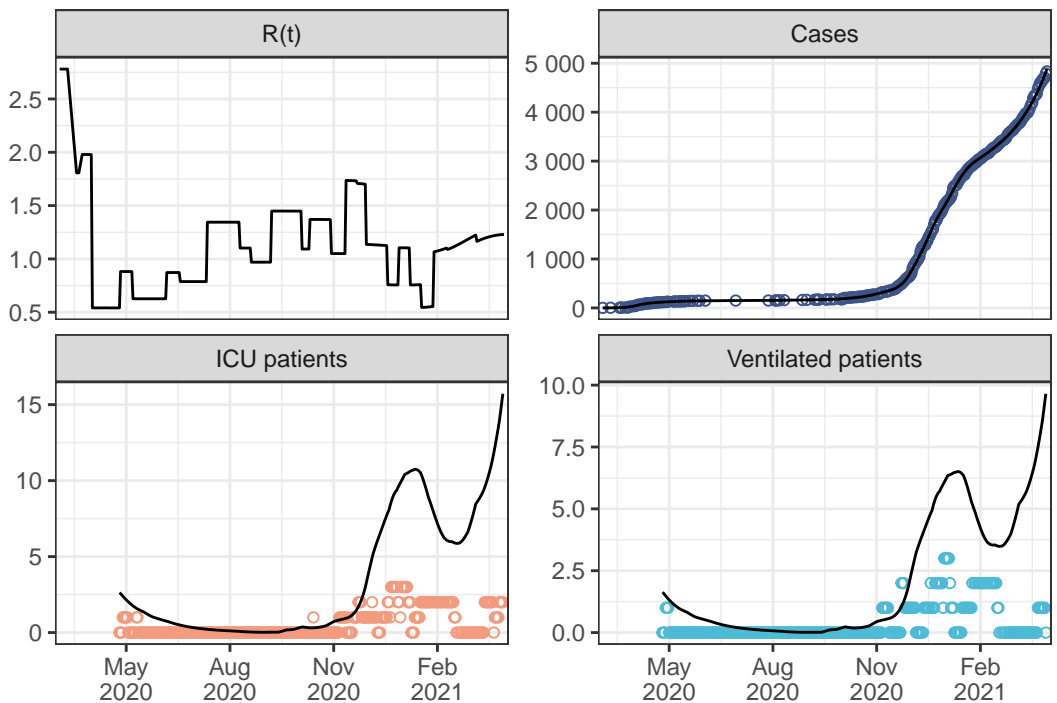

## LK Saalekreis

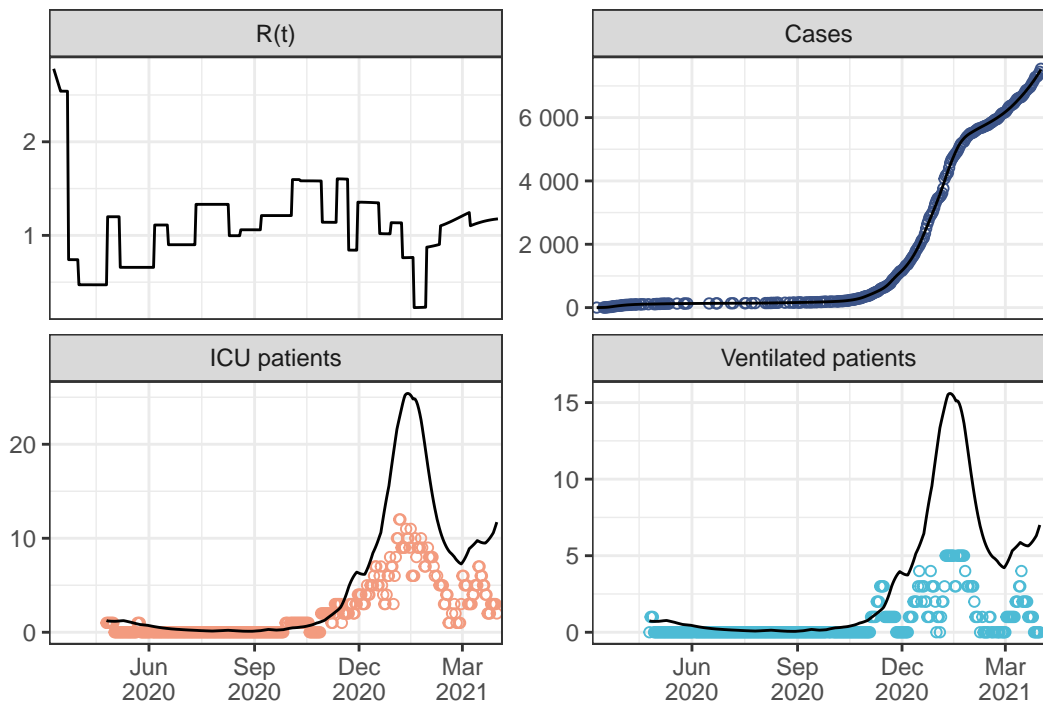

## LK Saalfeld–Rudolstadt

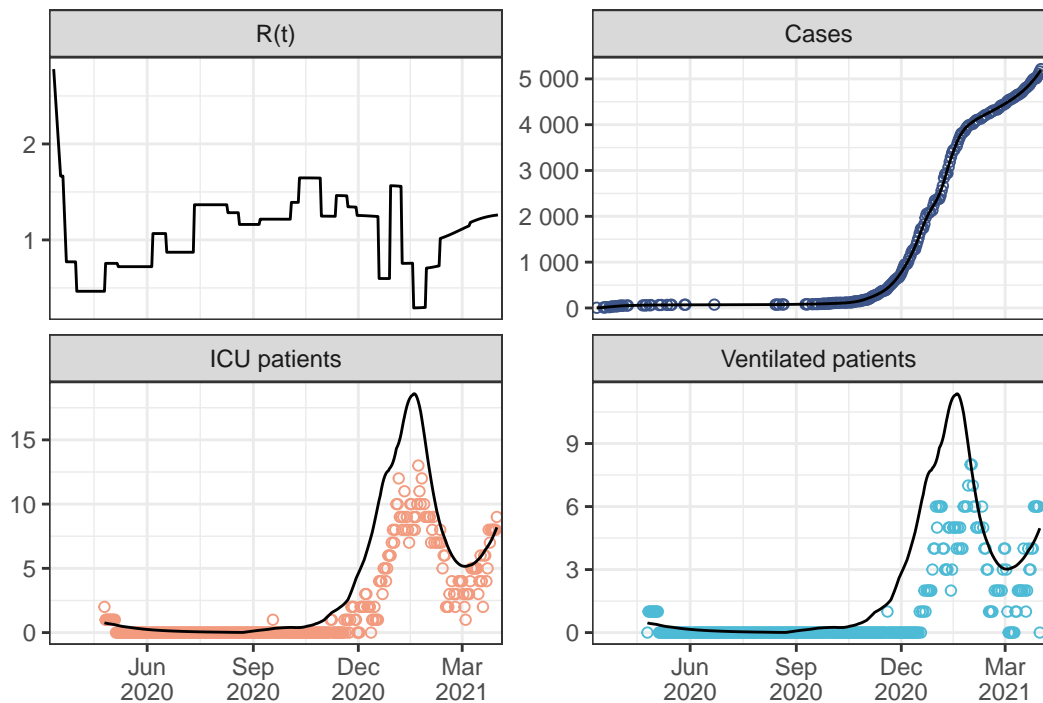

## LK Saar-Pfalz-Kreis

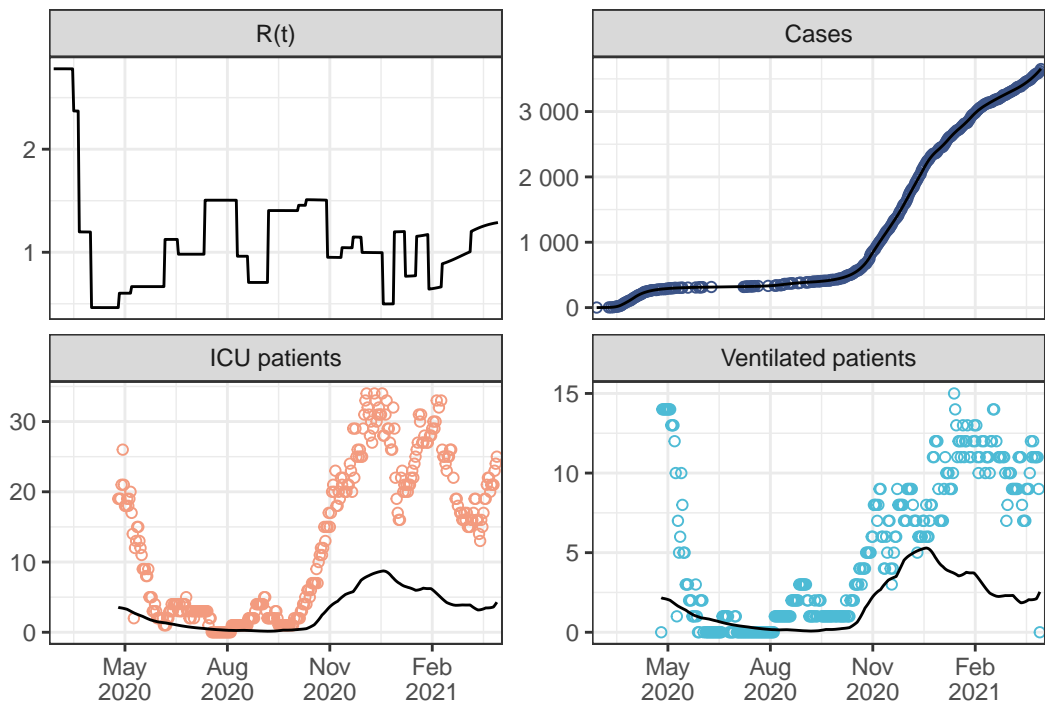

## LK Saarlouis

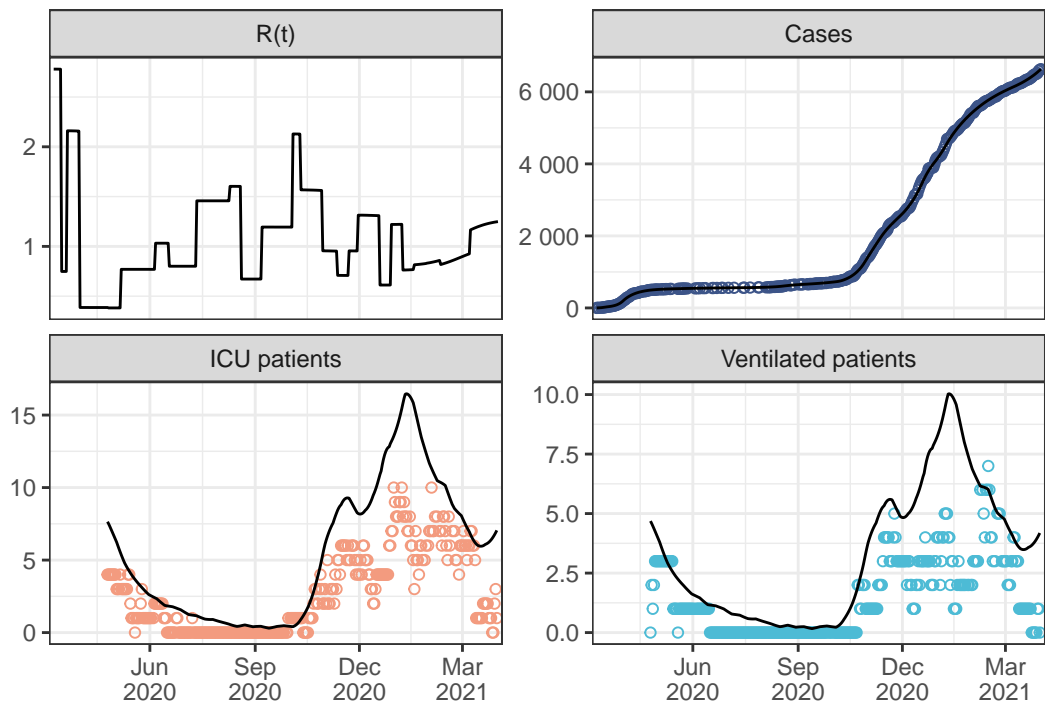

## LK Sächsische Schweiz–Osterzgebirge

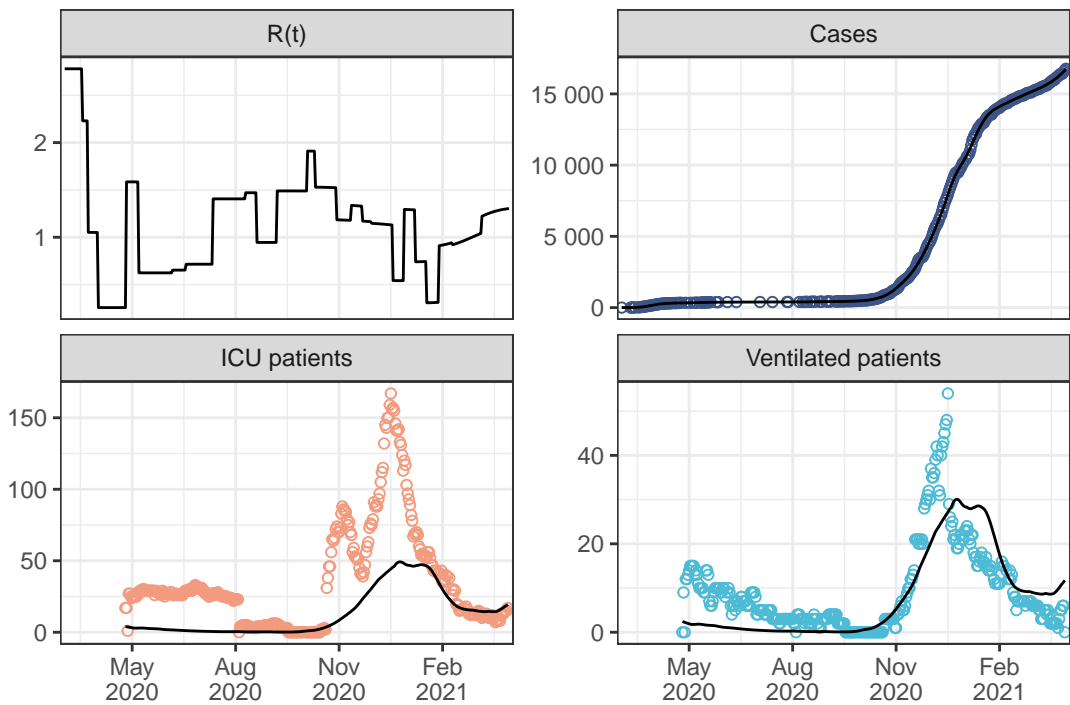

## LK Salzlandkreis

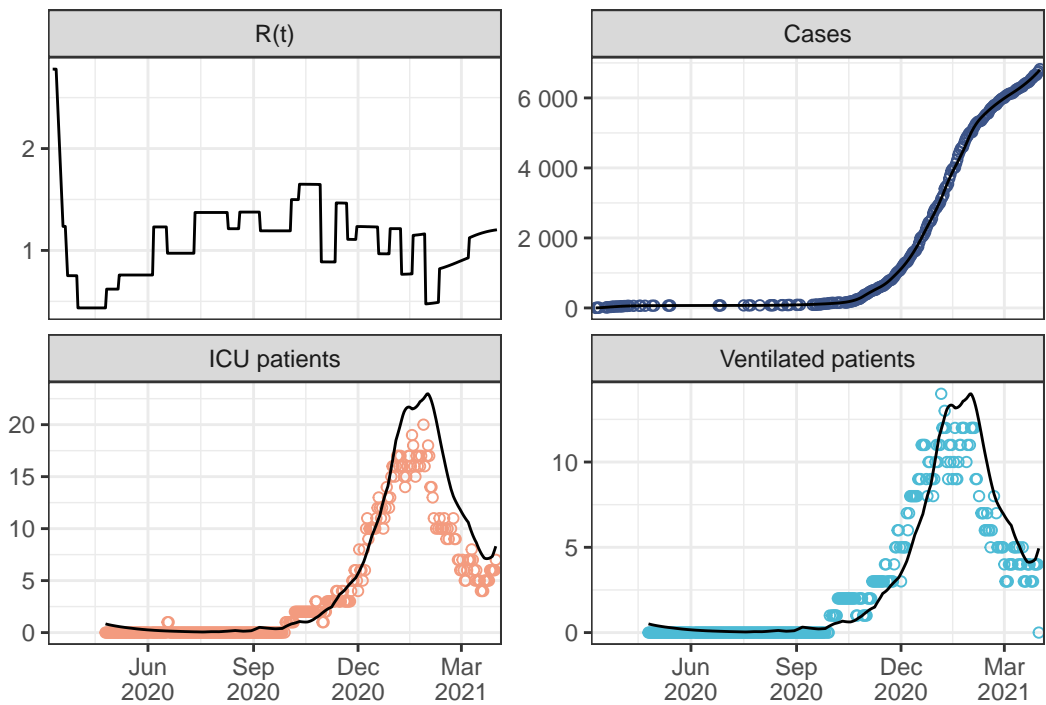

## LK Sankt Wendel

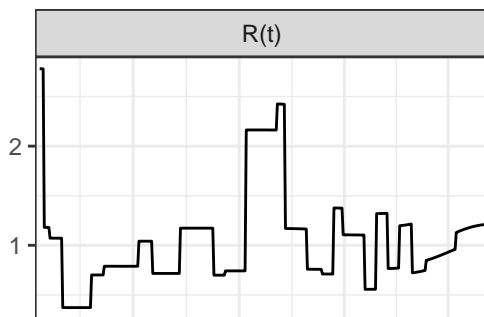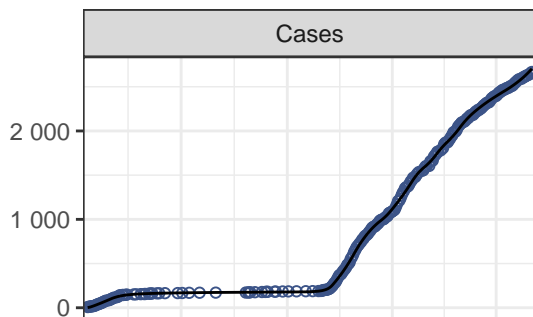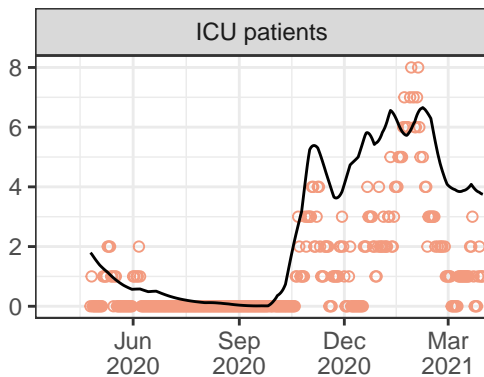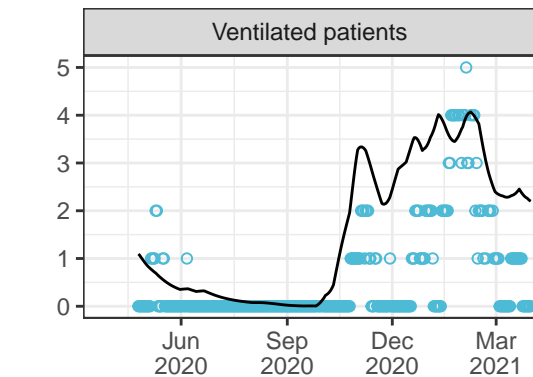

## LK Schaumburg

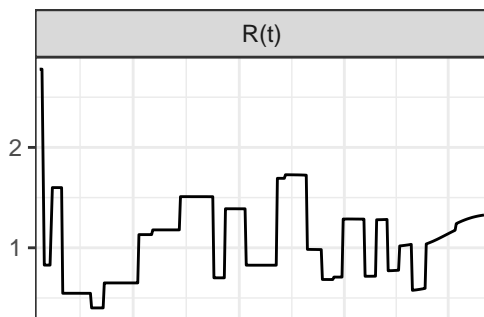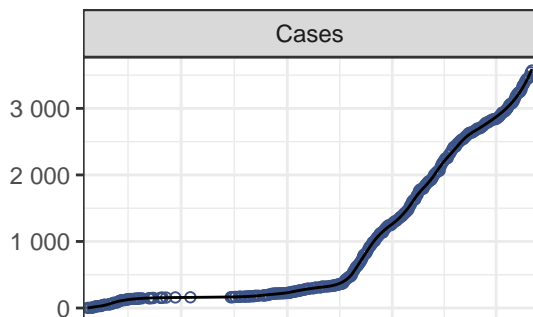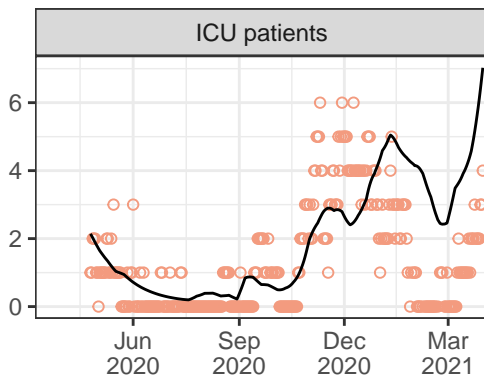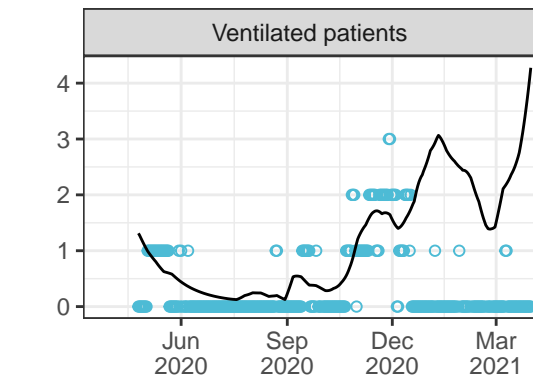

## LK Schleswig–Flensburg

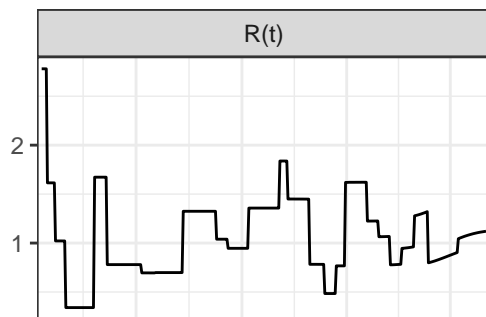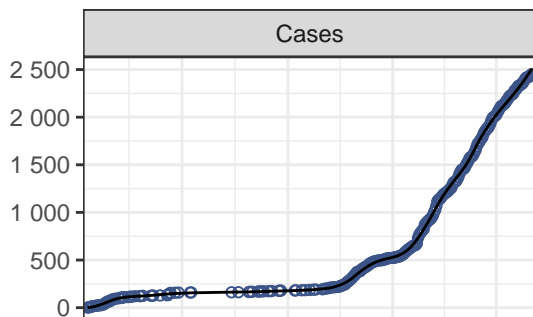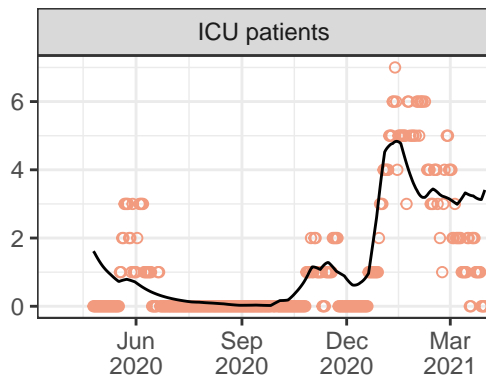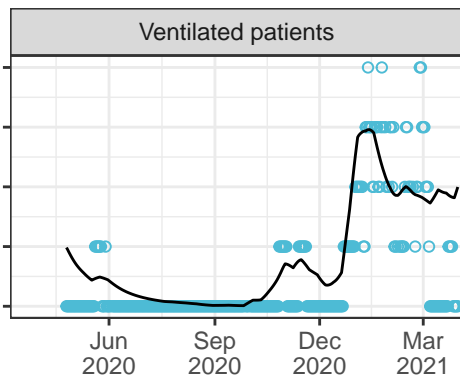

## LK Schmalkalden–Meiningen

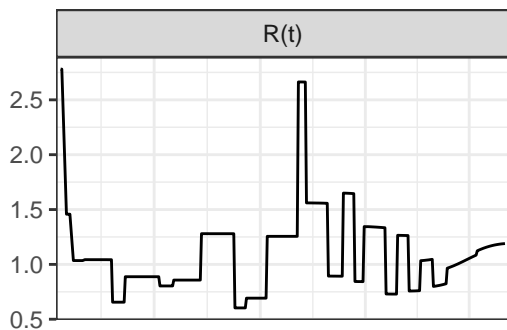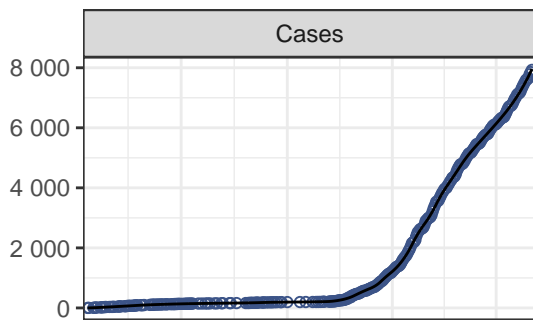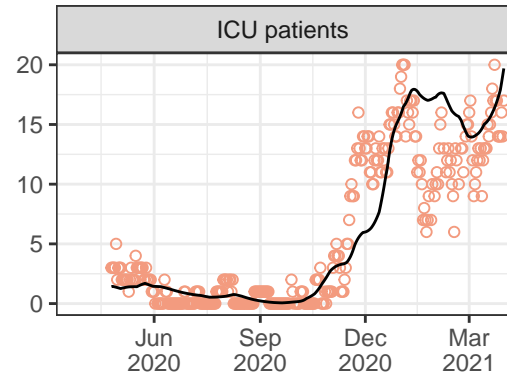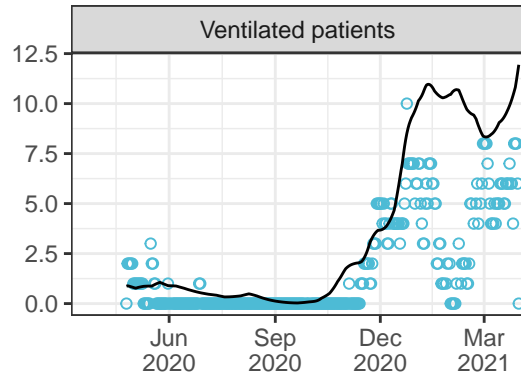

## LK Schwäbisch Hall

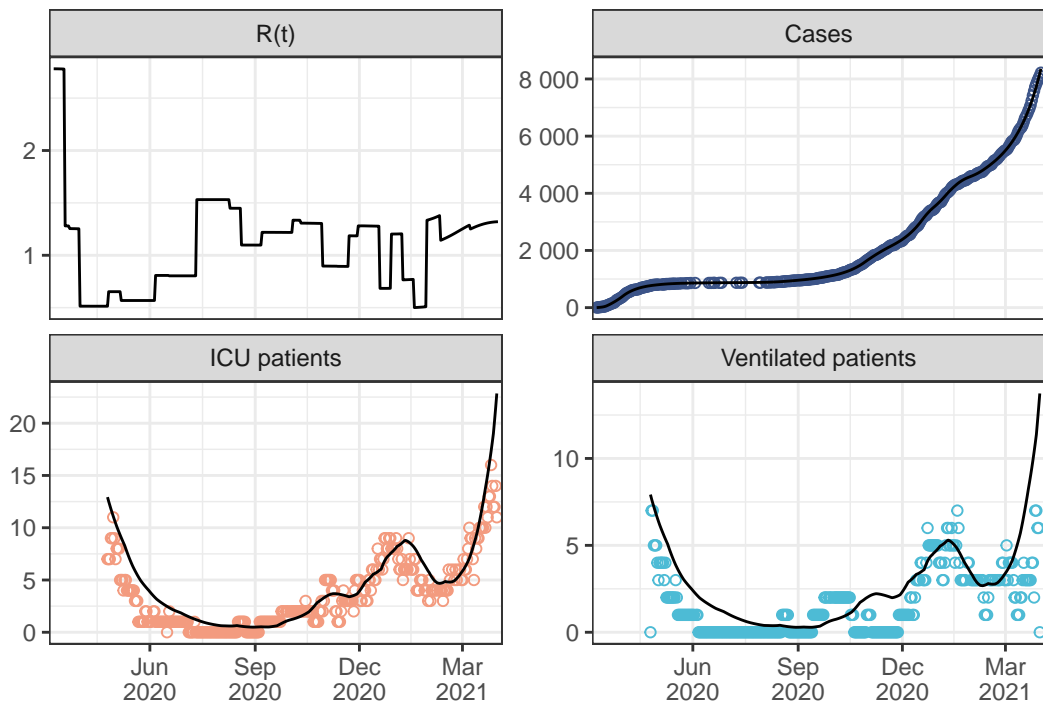

## LK Schwalm-Eder-Kreis

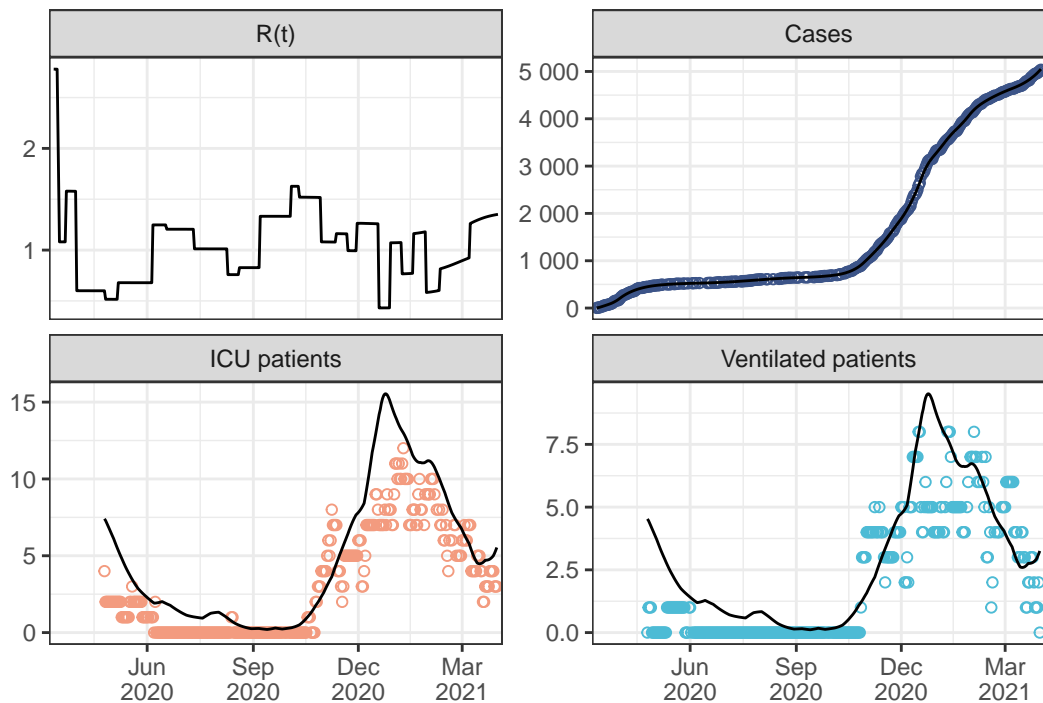

## LK Schwandorf

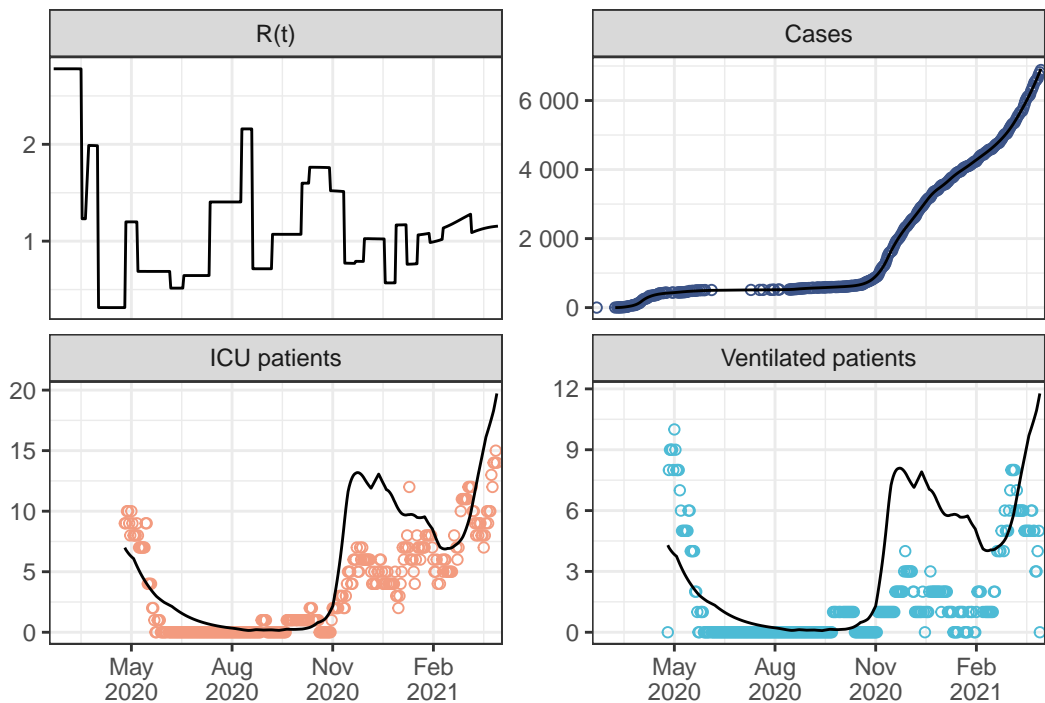

## LK Schwarzwald-Baar-Kreis

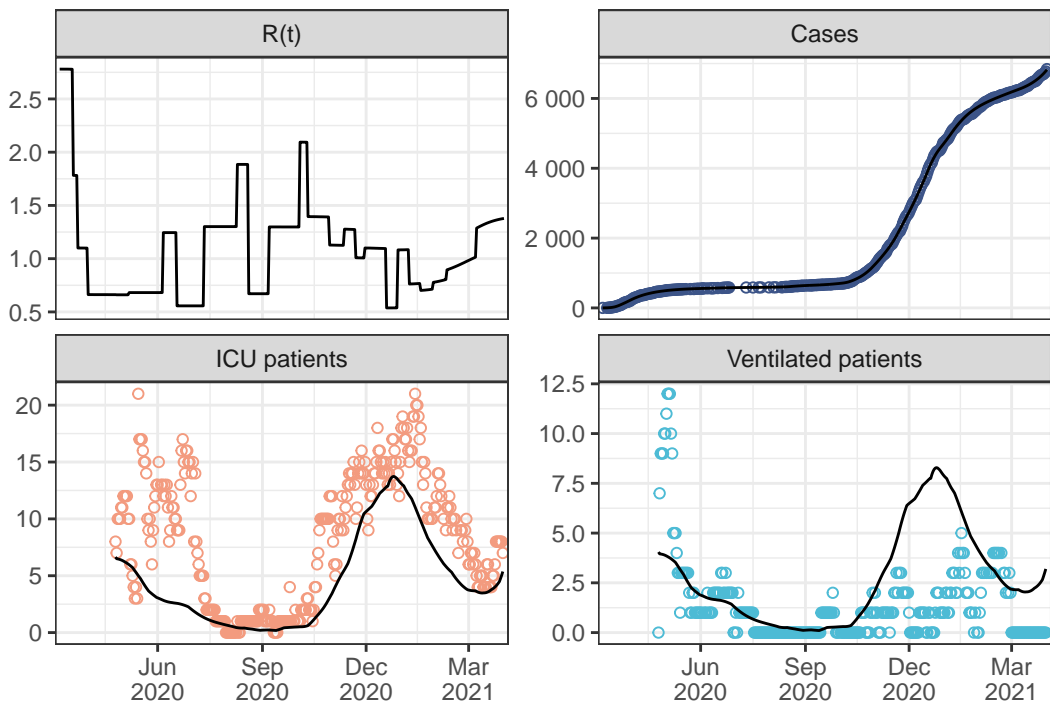

## LK Schweinfurt

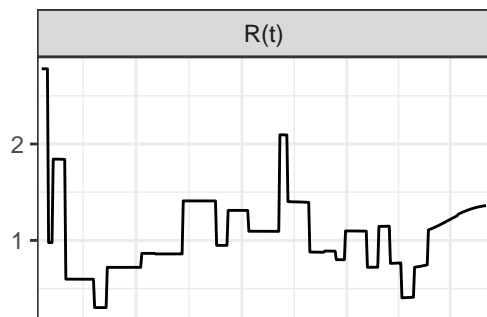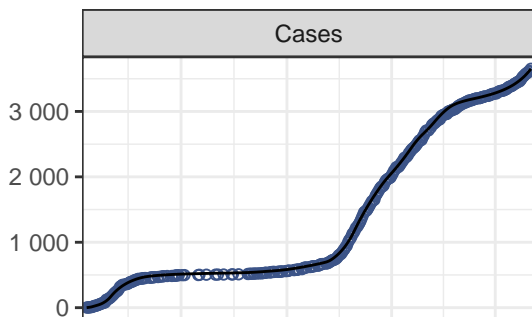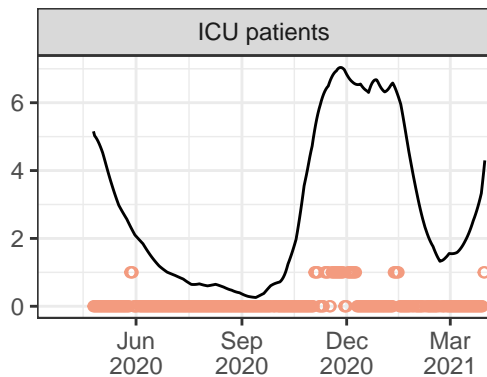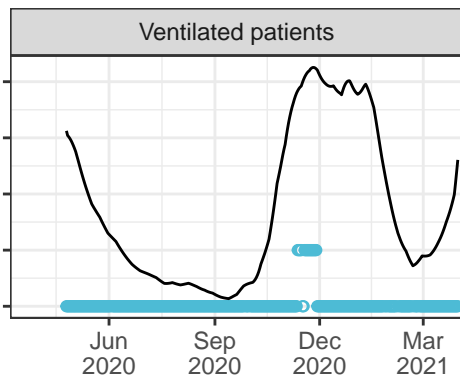

## LK Segeberg

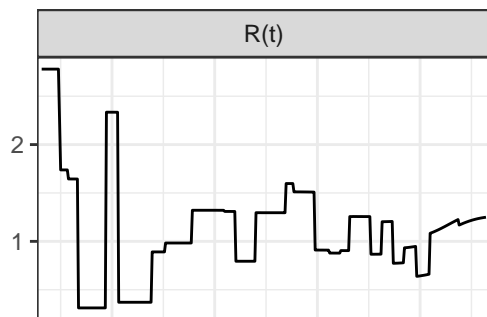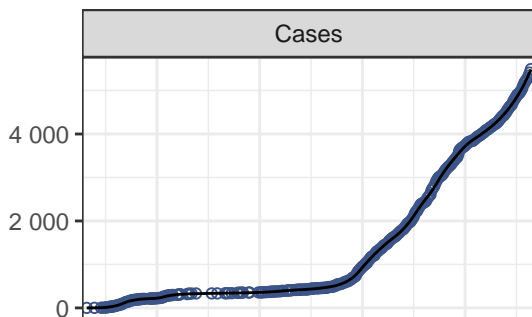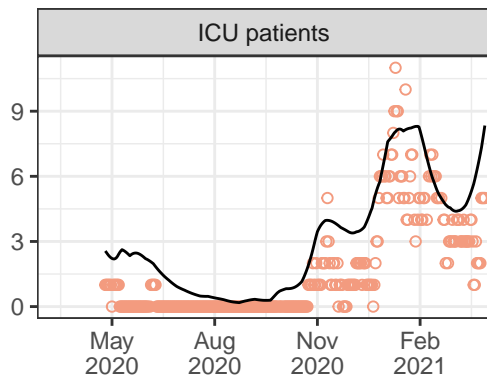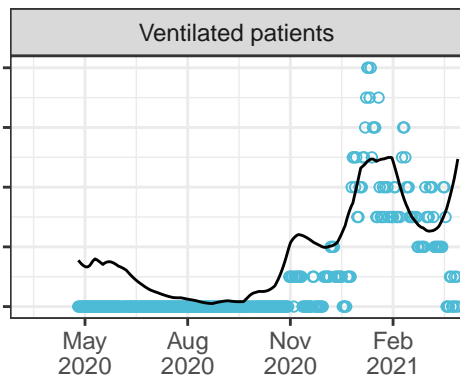

## LK Siegen–Wittgenstein

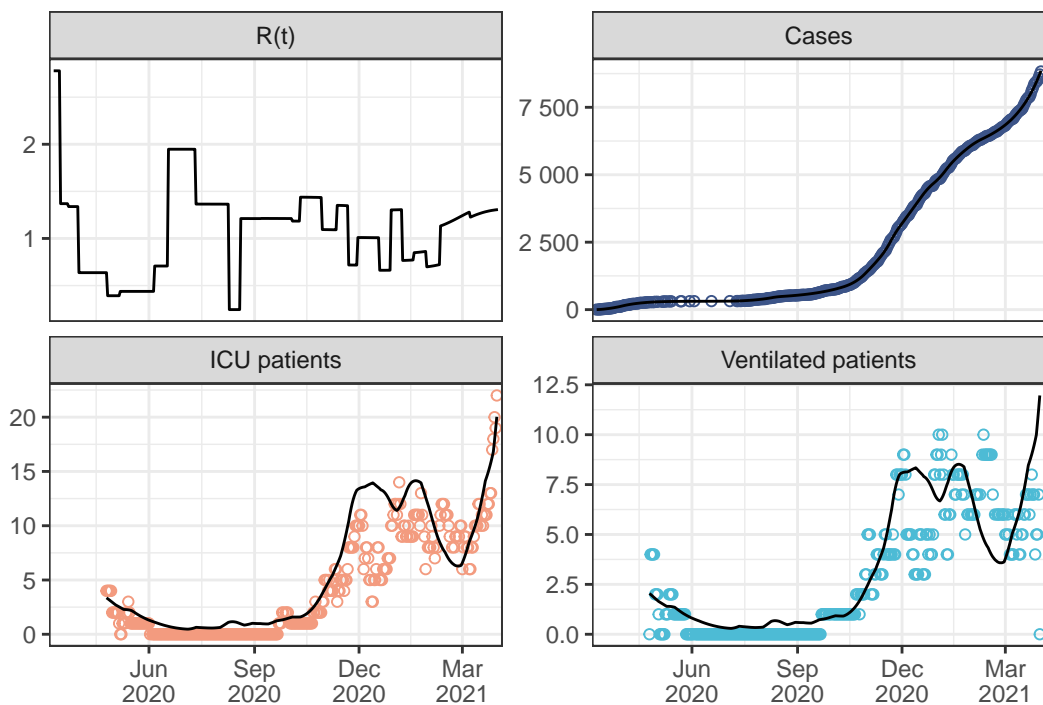

## LK Sigmaringen

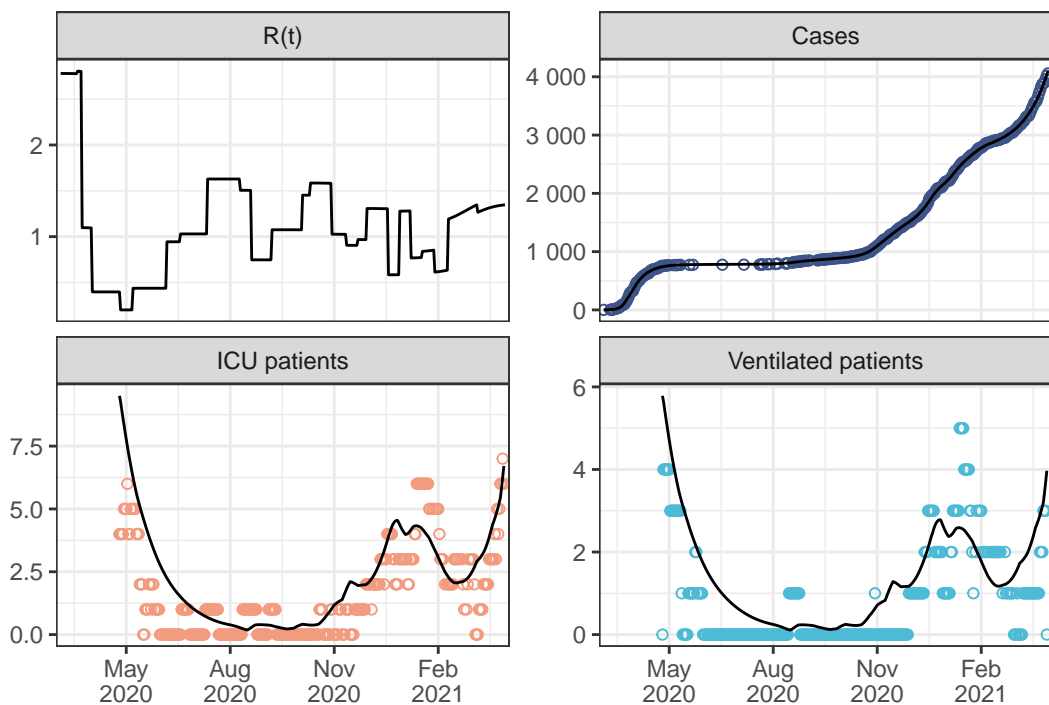

## LK Soest

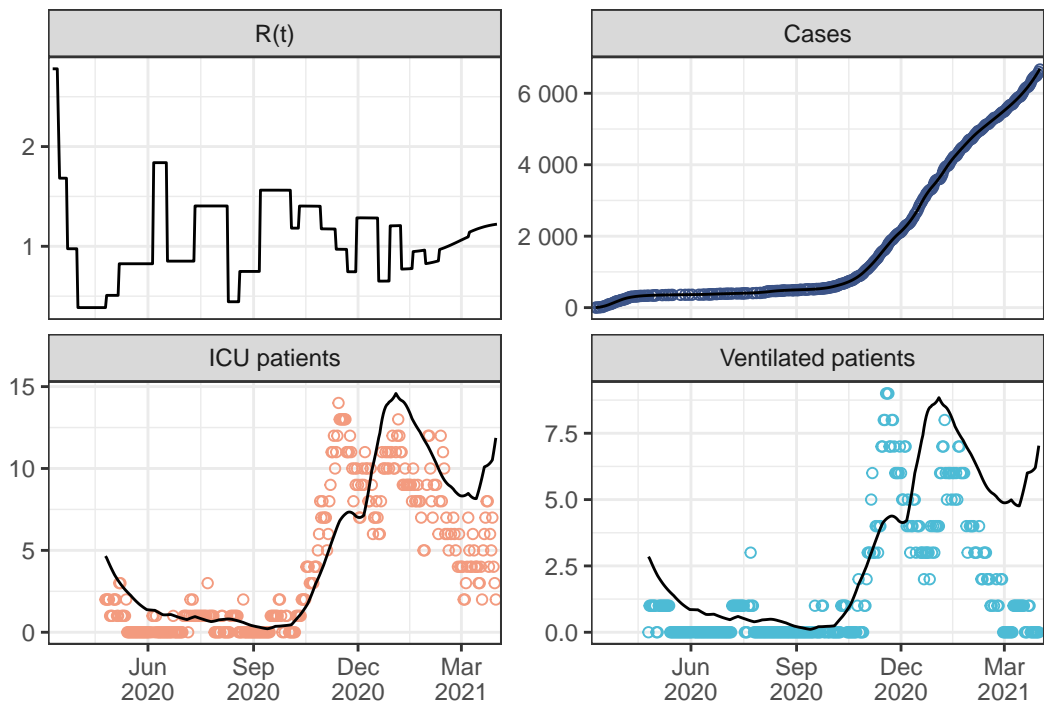

## LK Sömmerda

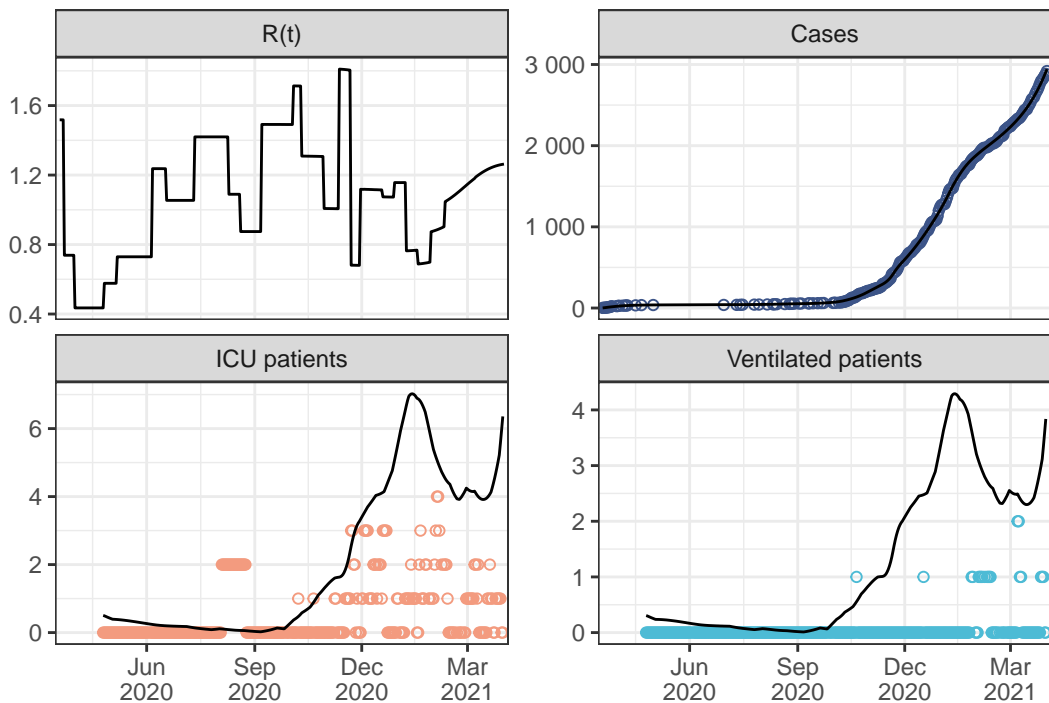

## LK Sonneberg

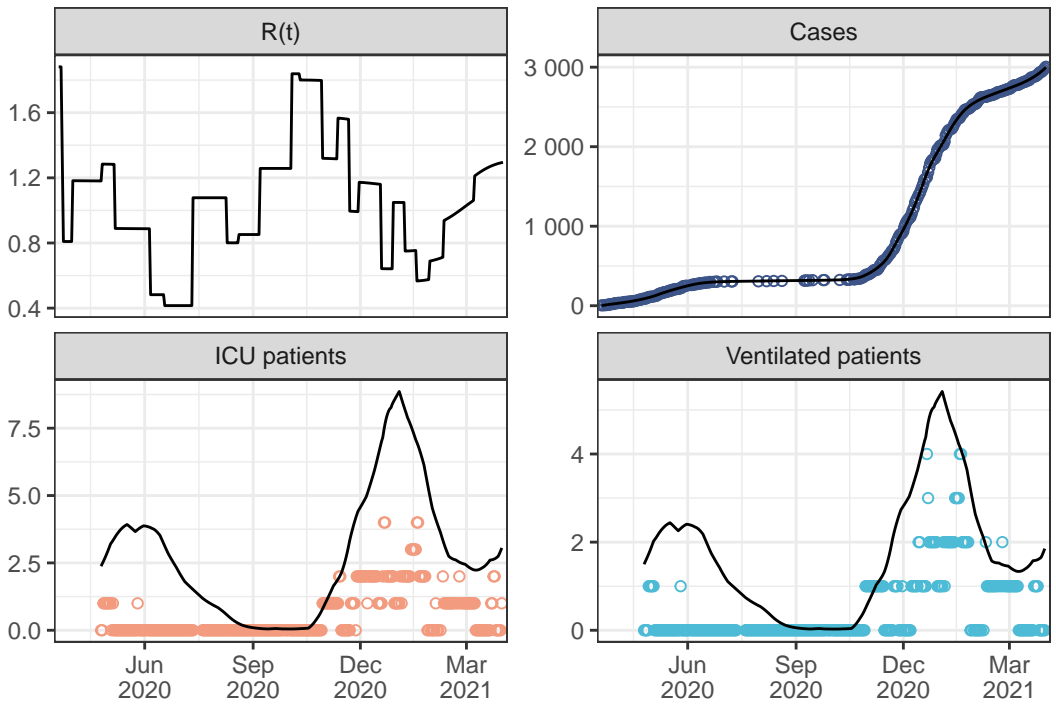

## LK Spree-Neiße

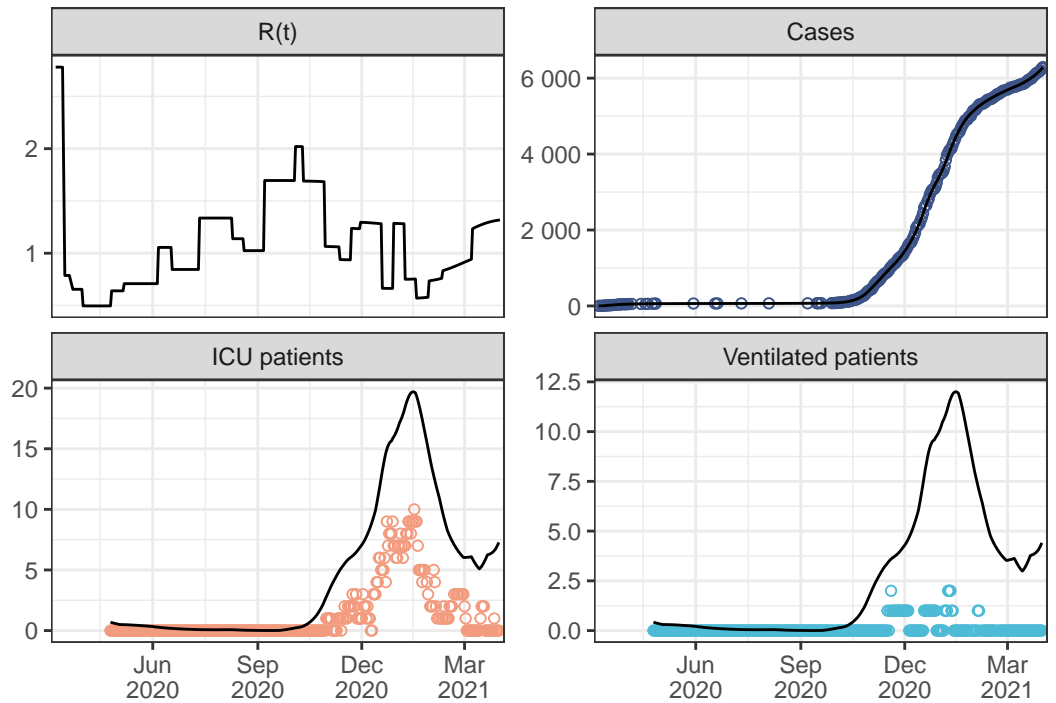

## LK Stade

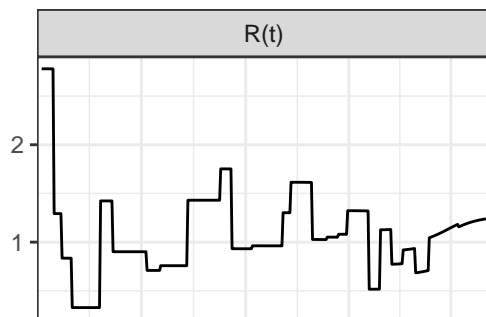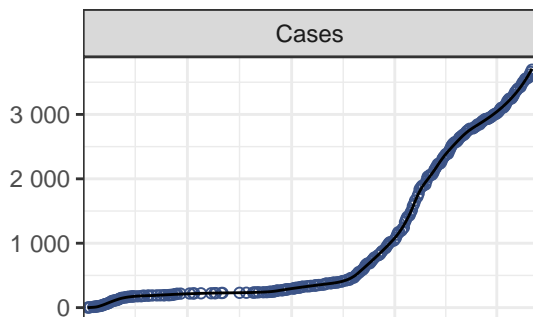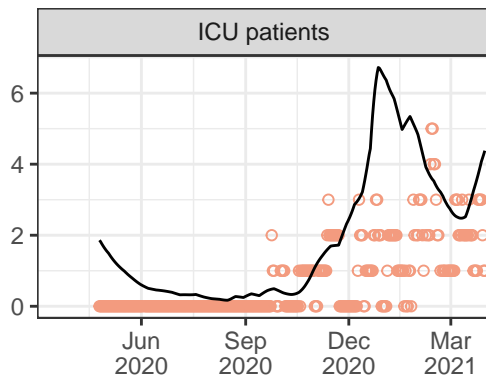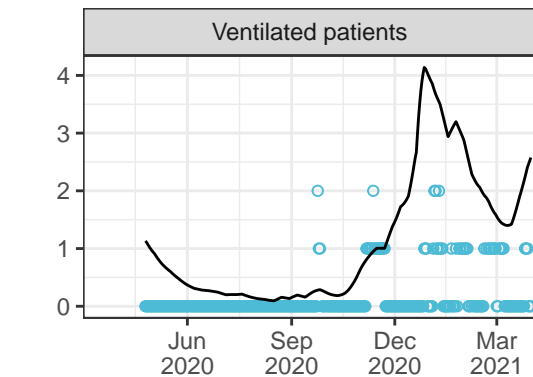

## LK Stadtverband Saarbrücken

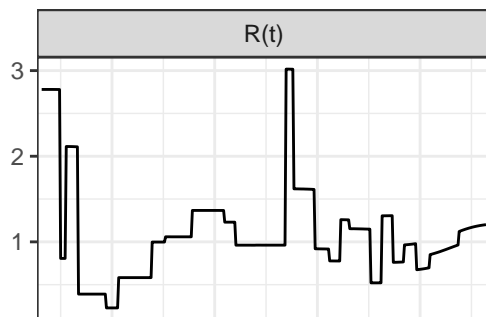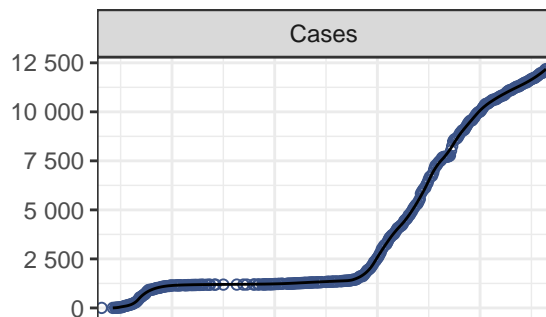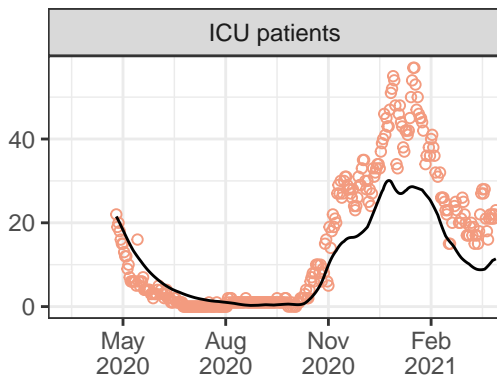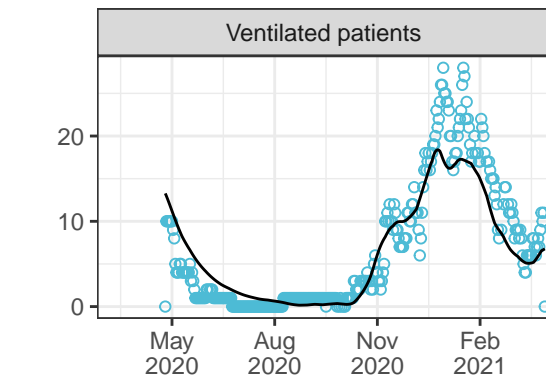

## LK Starnberg

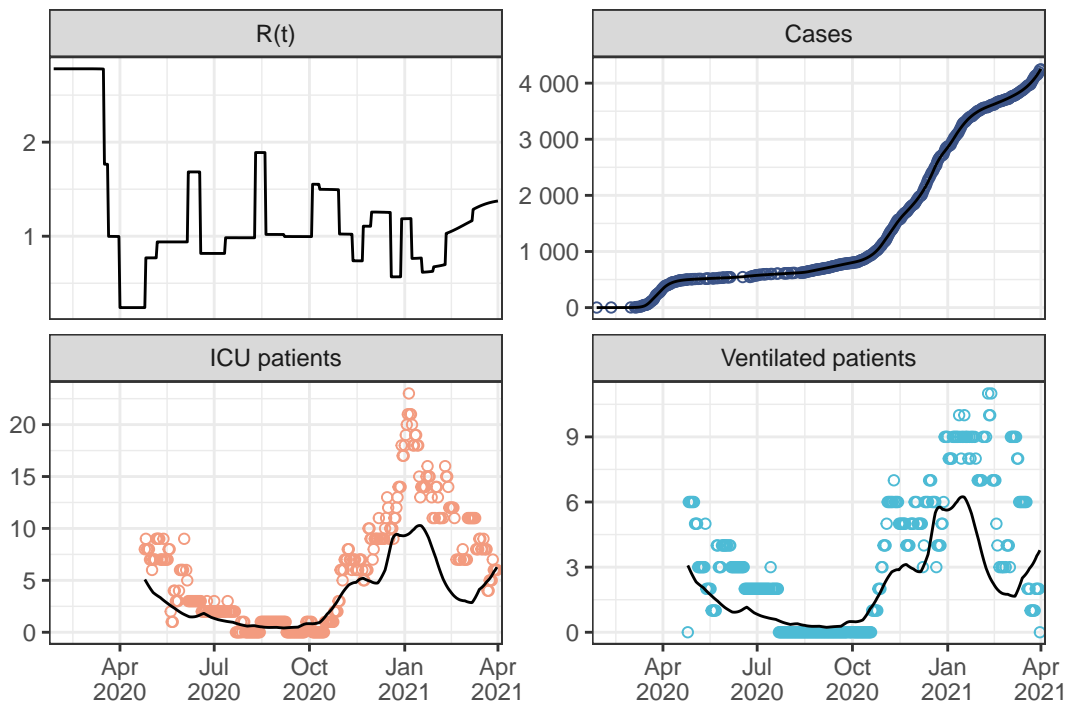

## LK Steinburg

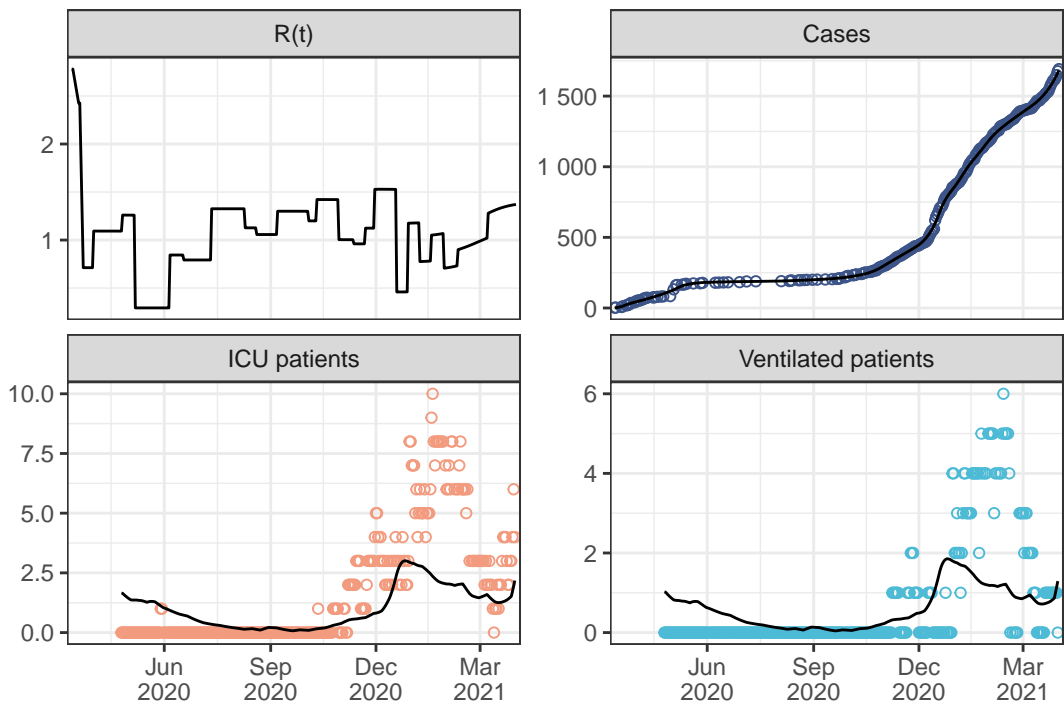

## LK Steinfurt

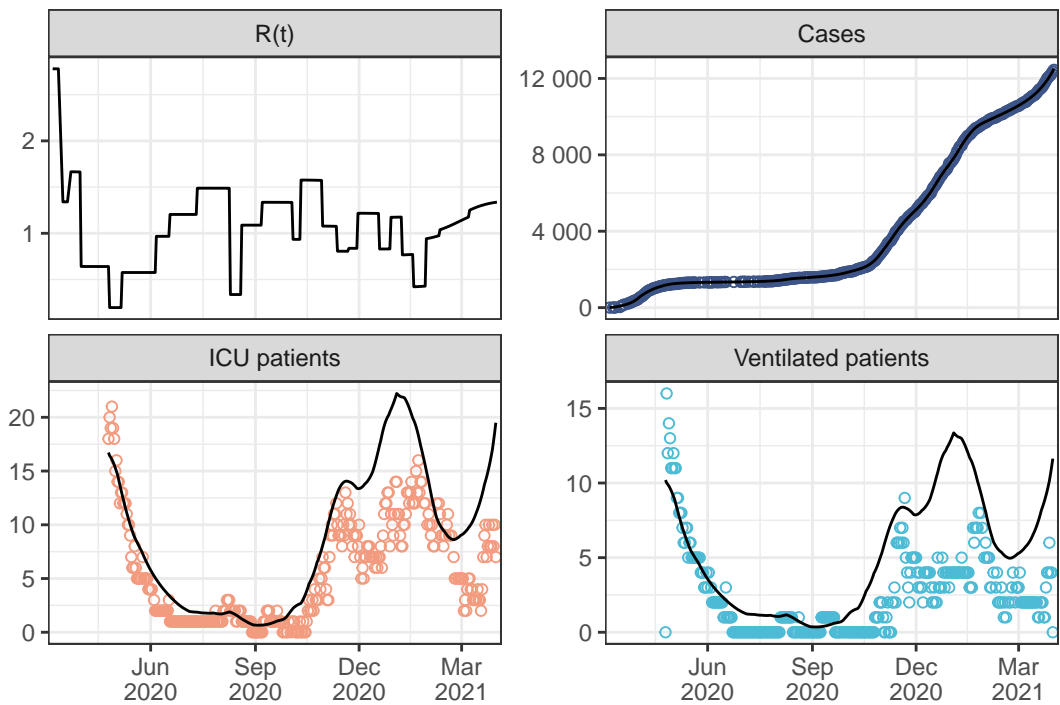

## LK Stendal

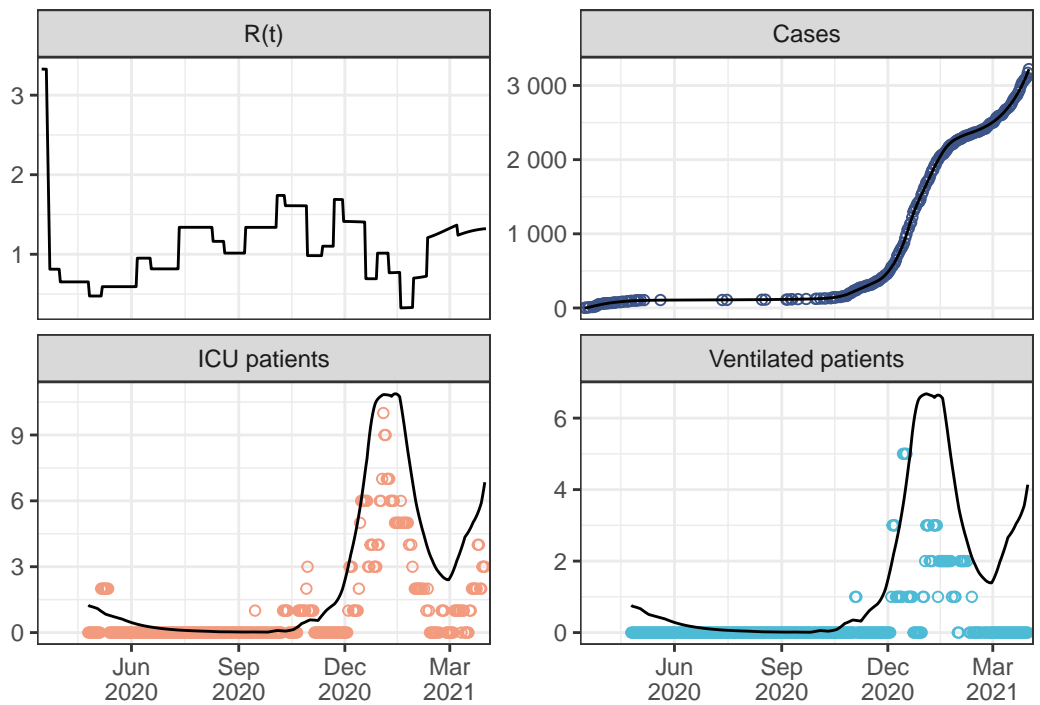

## LK Stormarn

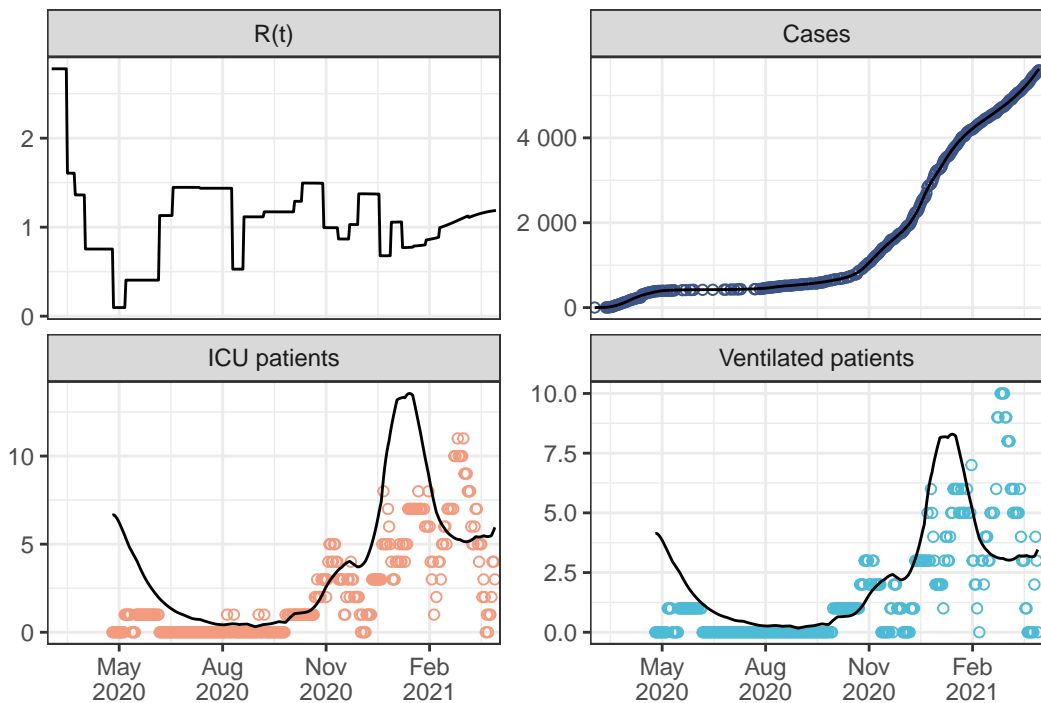

## LK Straubing-Bogen

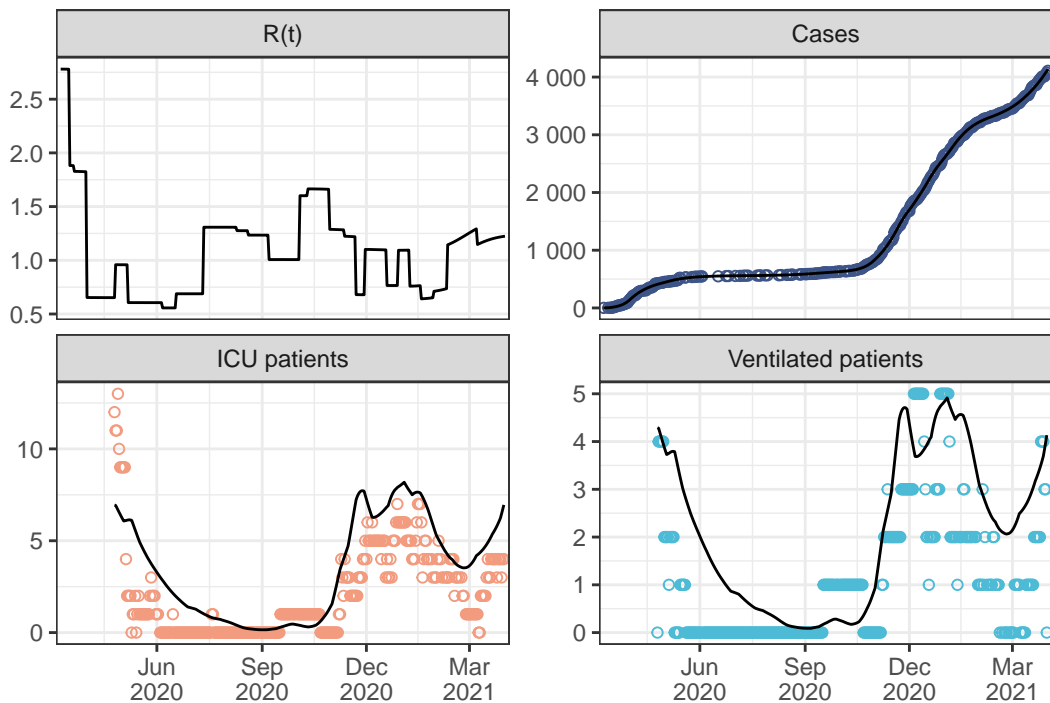

## LK Südliche Weinstraße

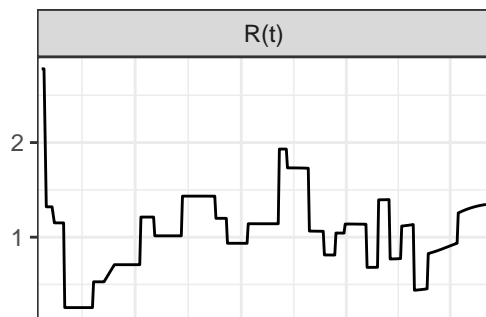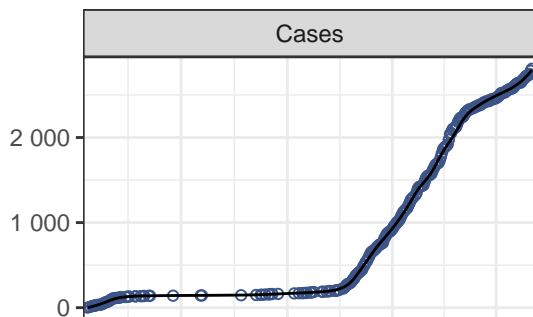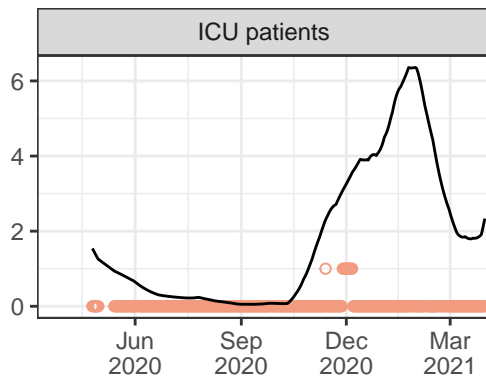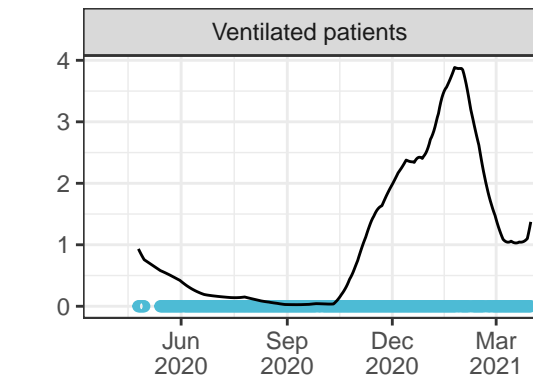

## LK Südwestpfalz

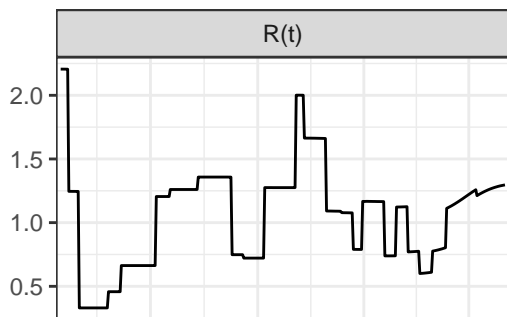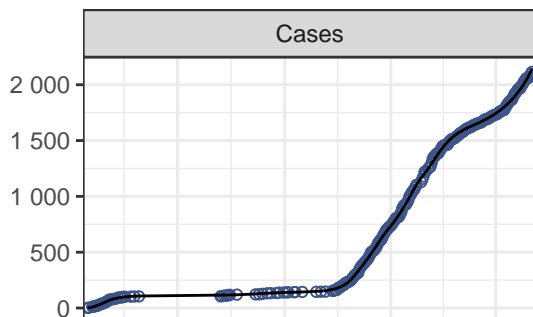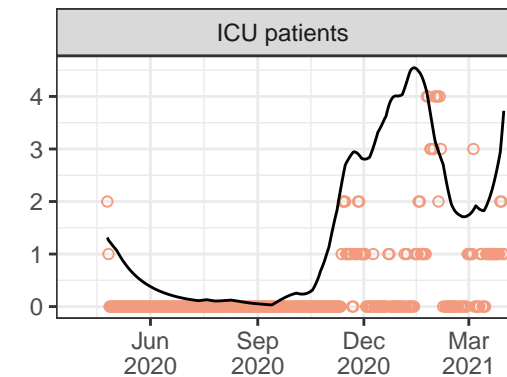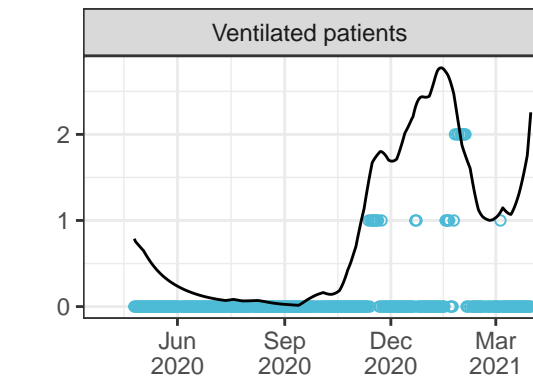

## LK Teltow-Fläming

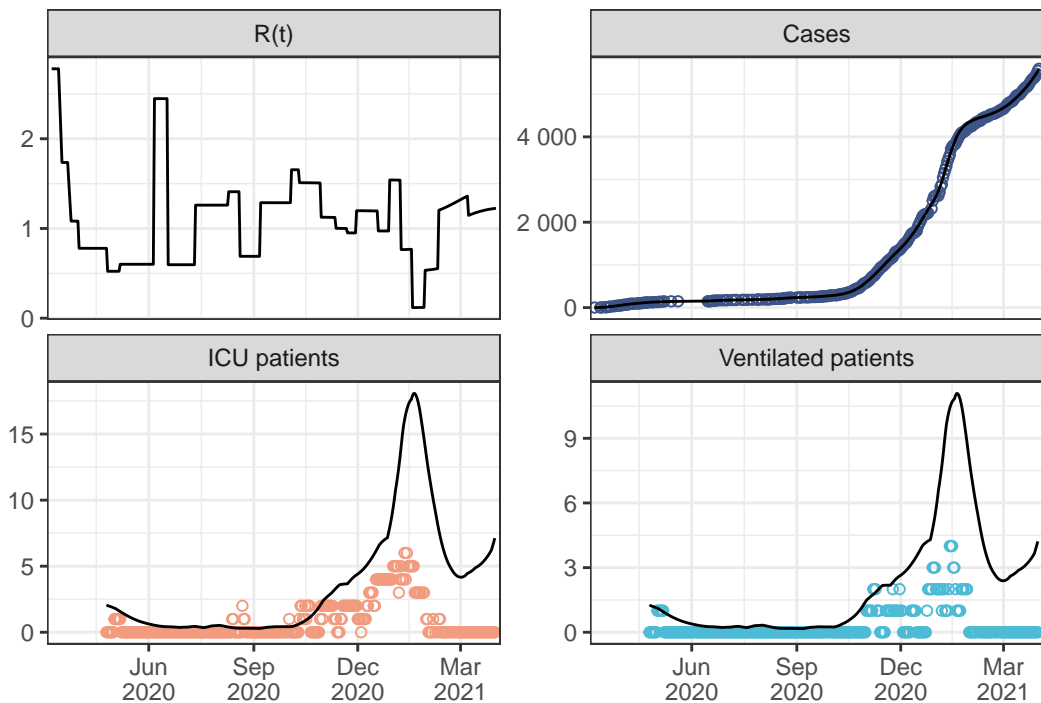

## LK Tirschenreuth

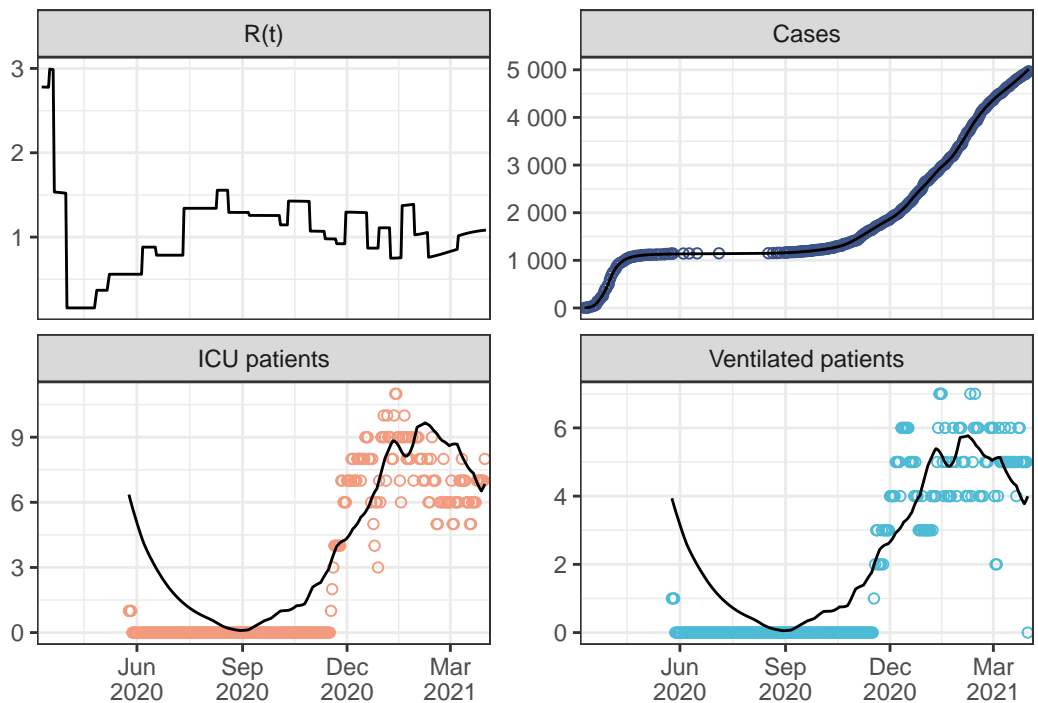

## LK Traunstein

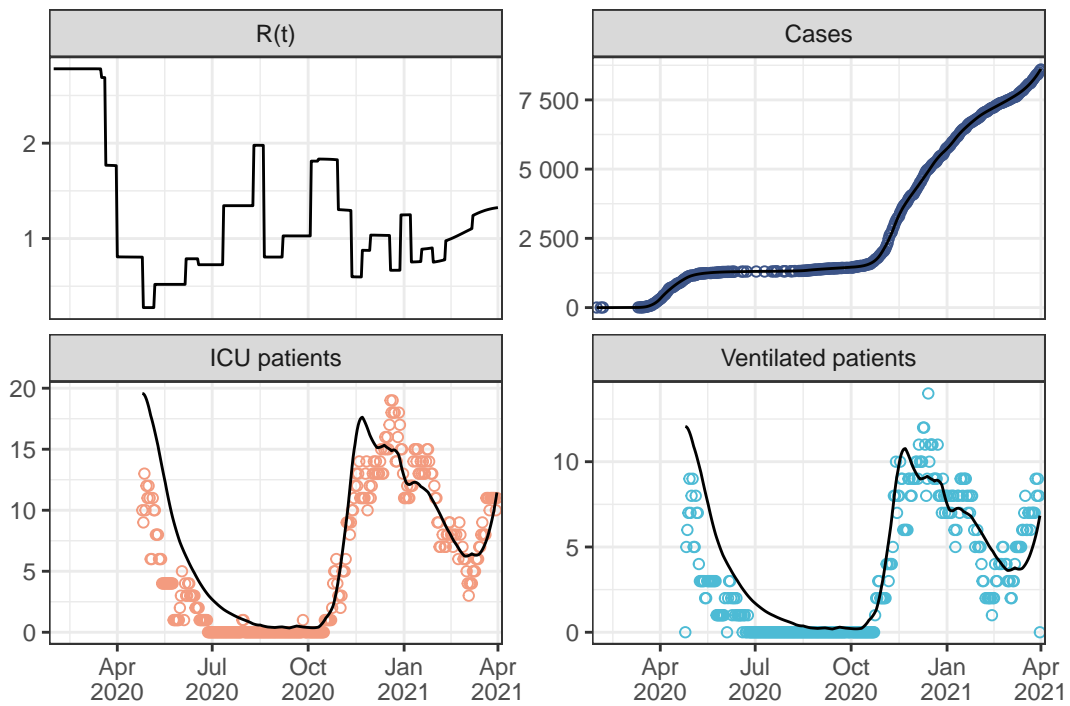

## LK Trier-Saarburg

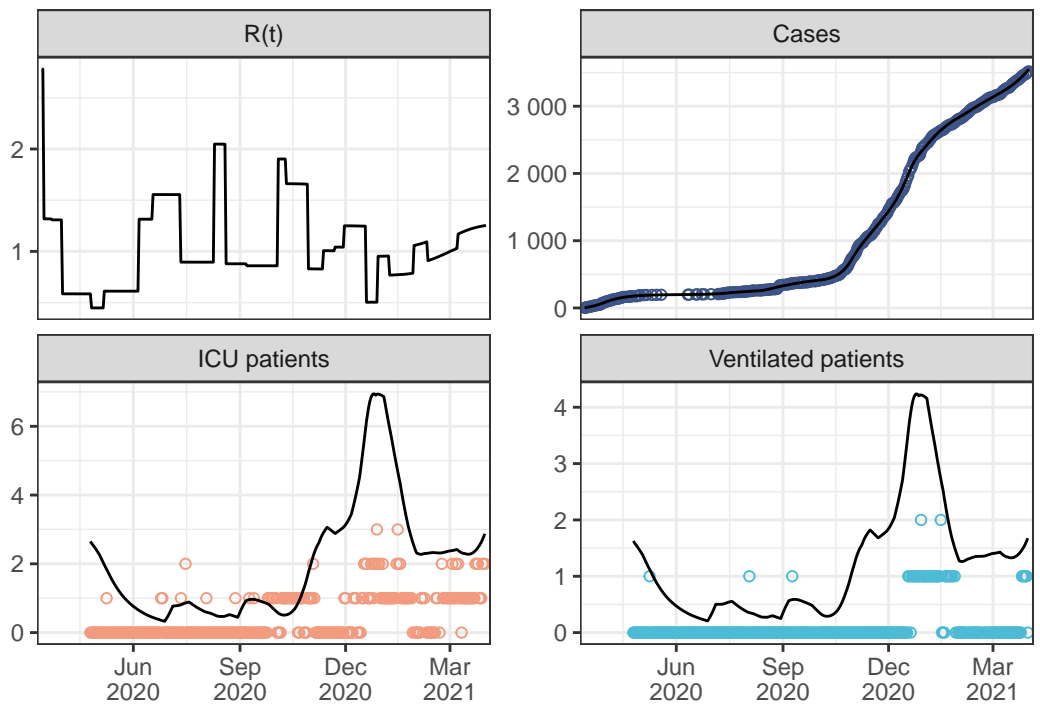

## LK Tübingen

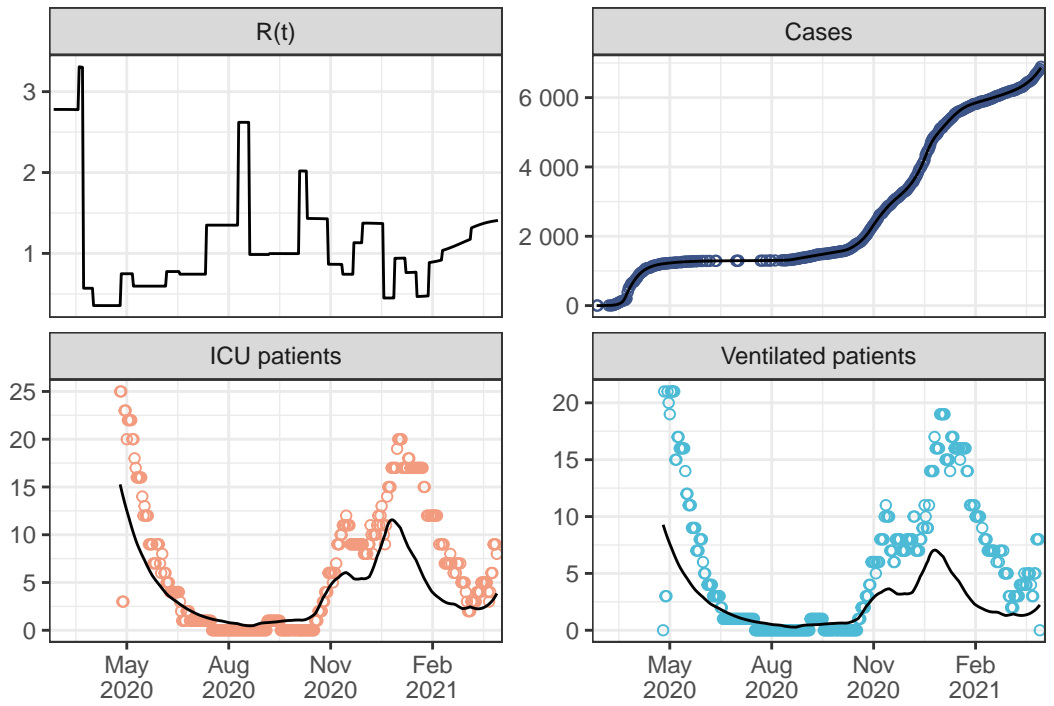

## LK Tuttlingen

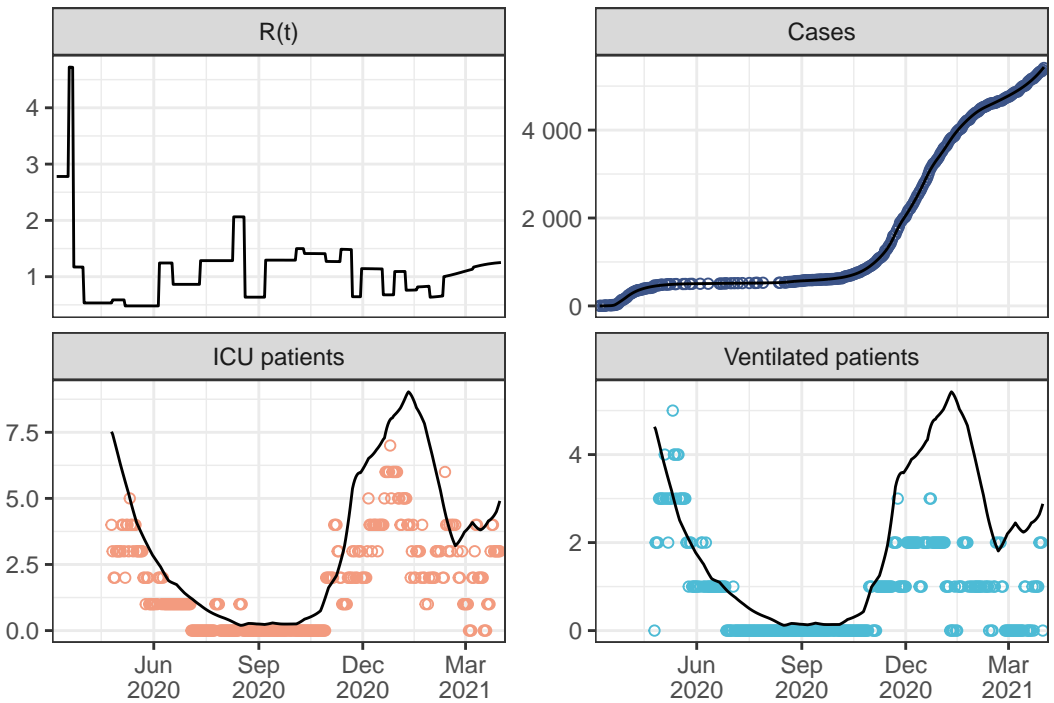

## LK Uckermark

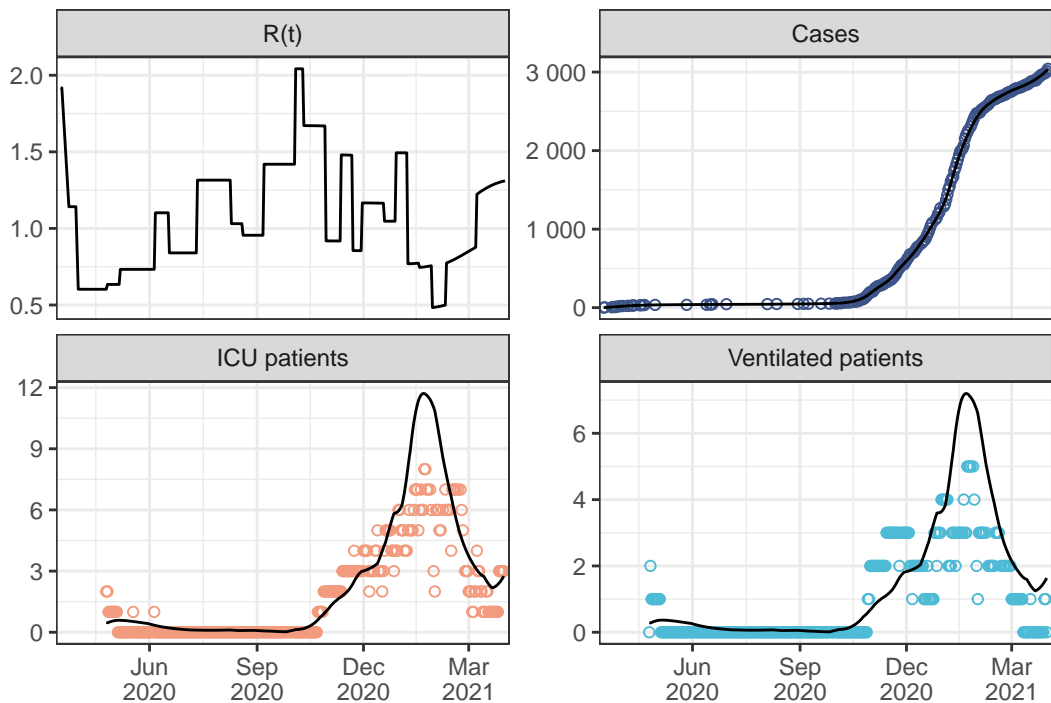

## LK Uelzen

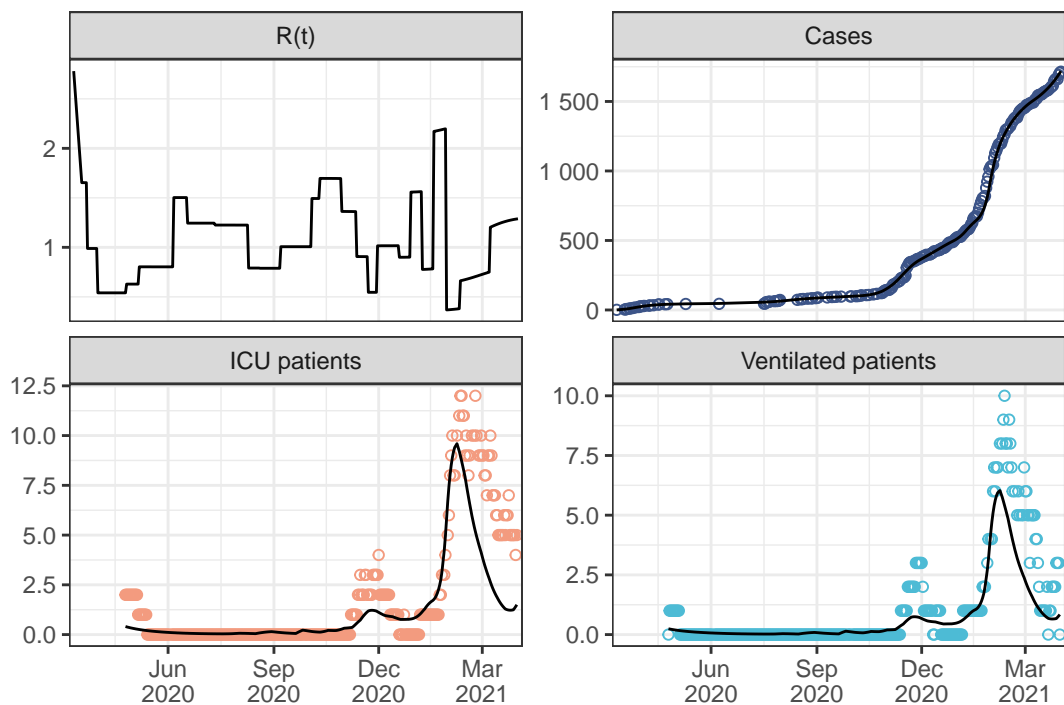

## LK Unna

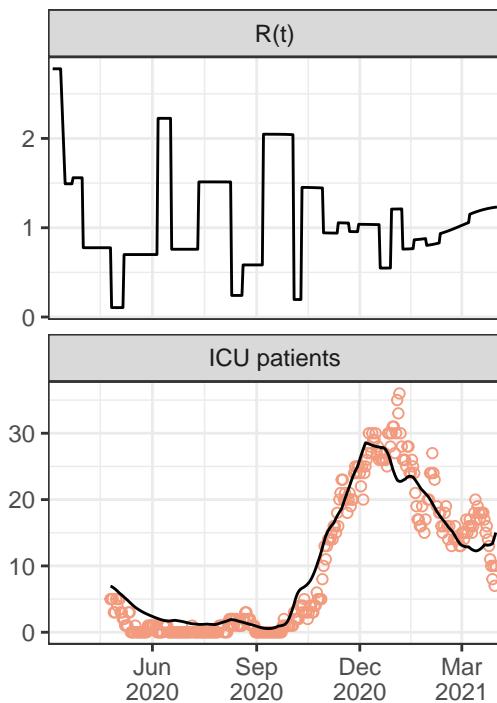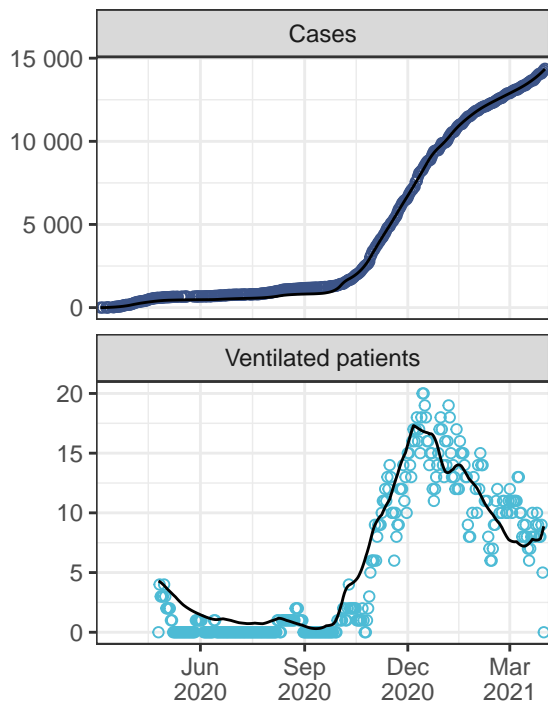

## LK Unstrut-Hainich-Kreis

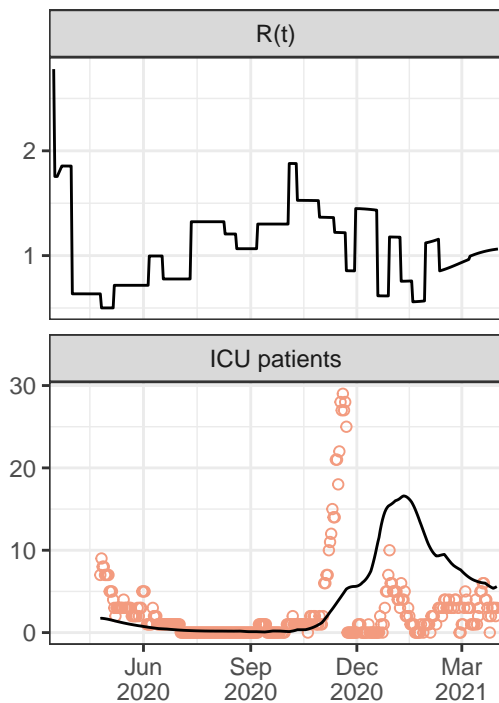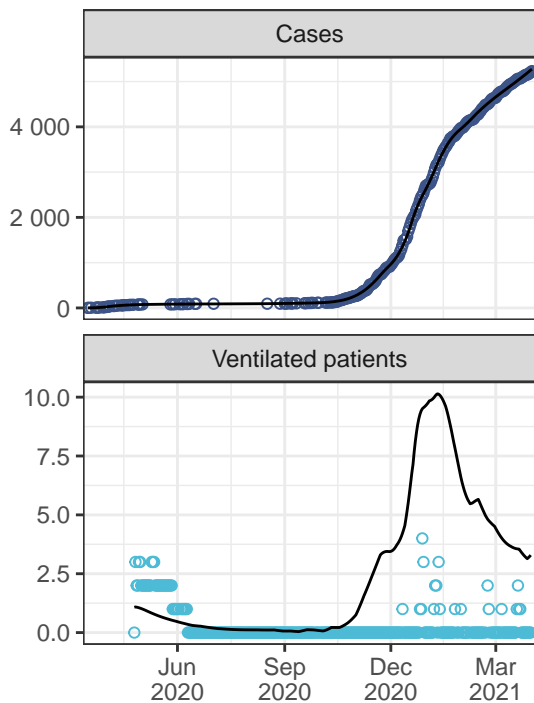

## LK Unterallgäu

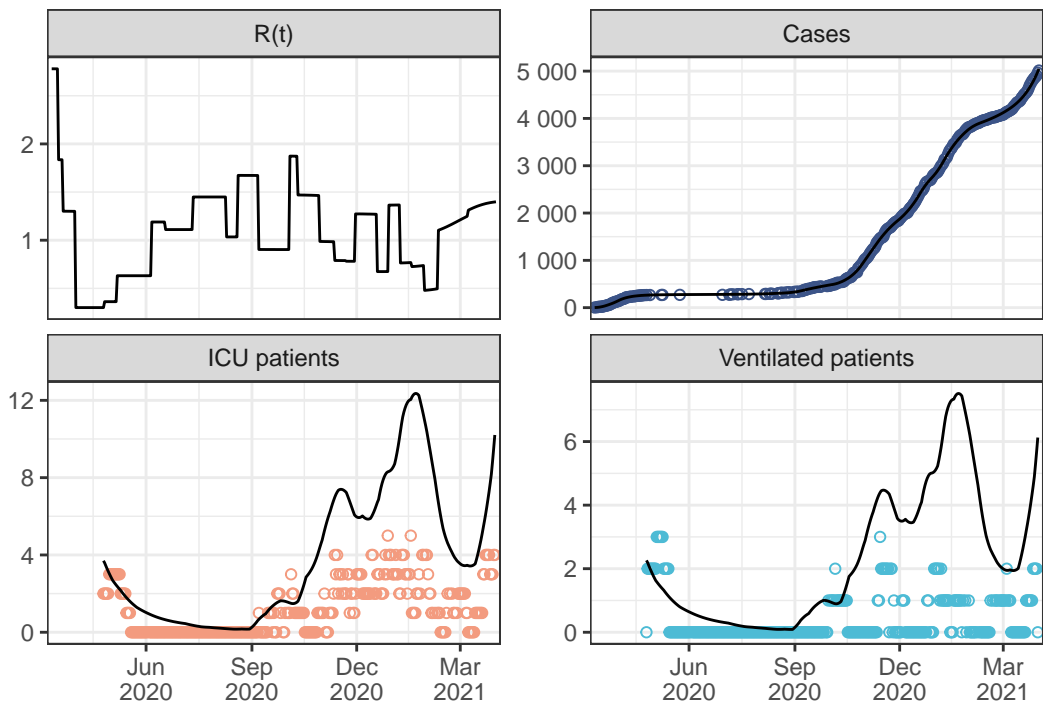

## LK Vechta

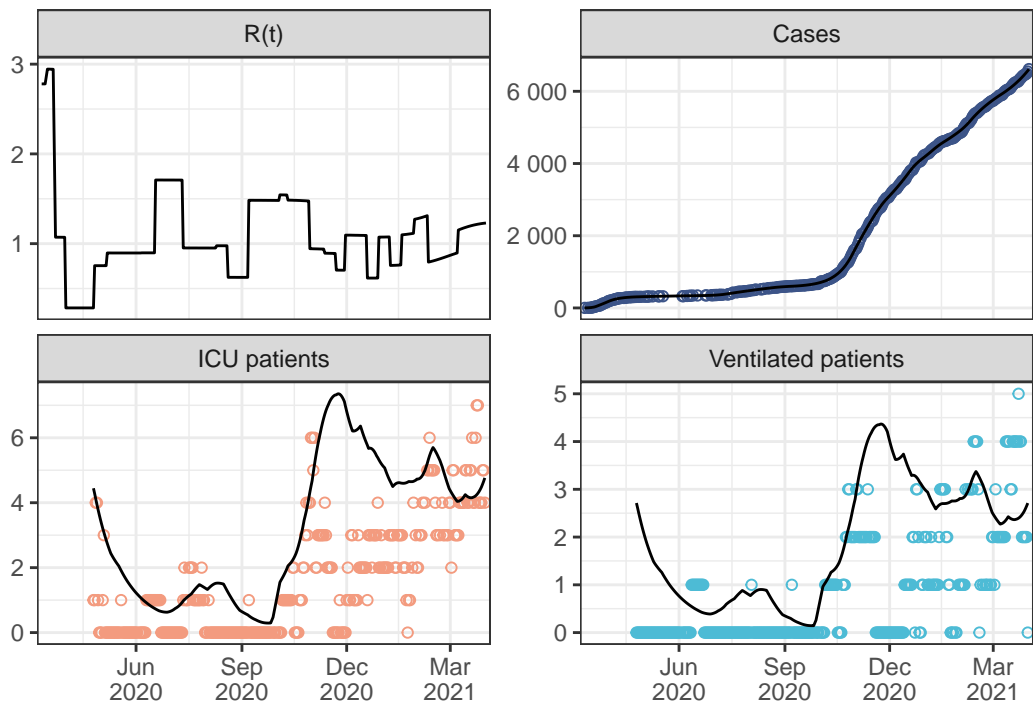

## LK Verden

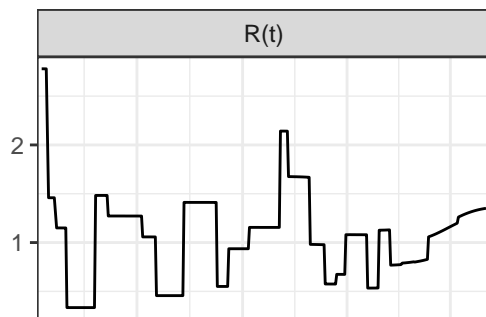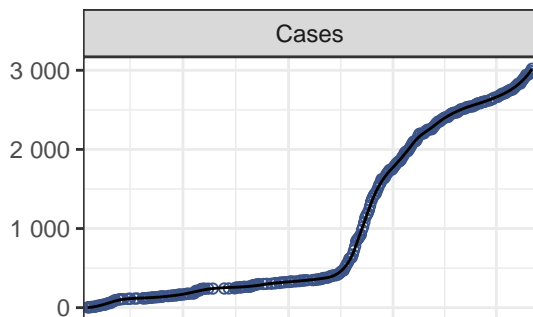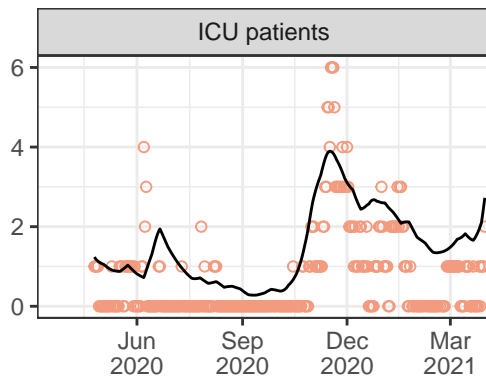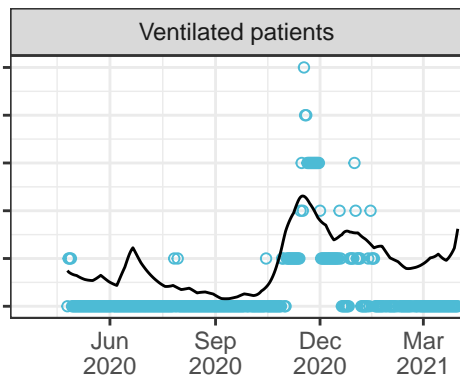

## LK Viersen

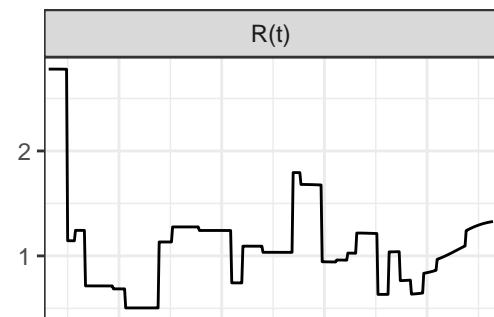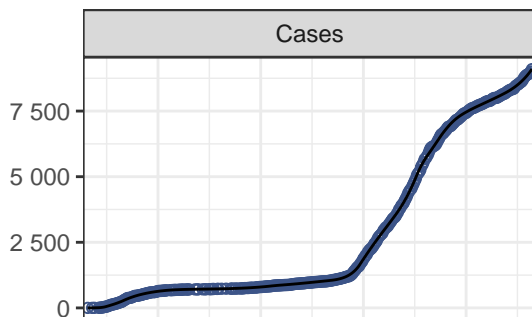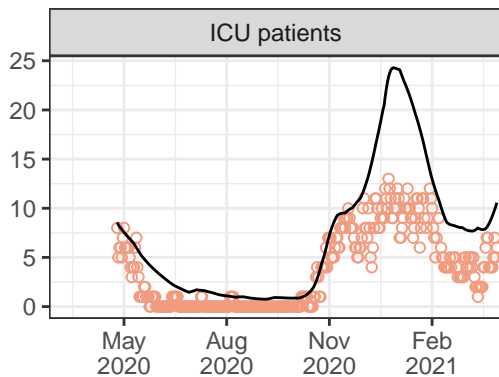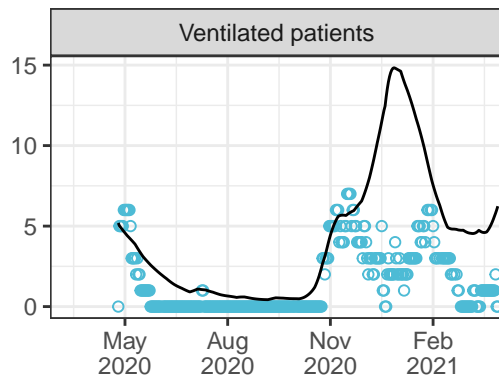

## LK Vogelsbergkreis

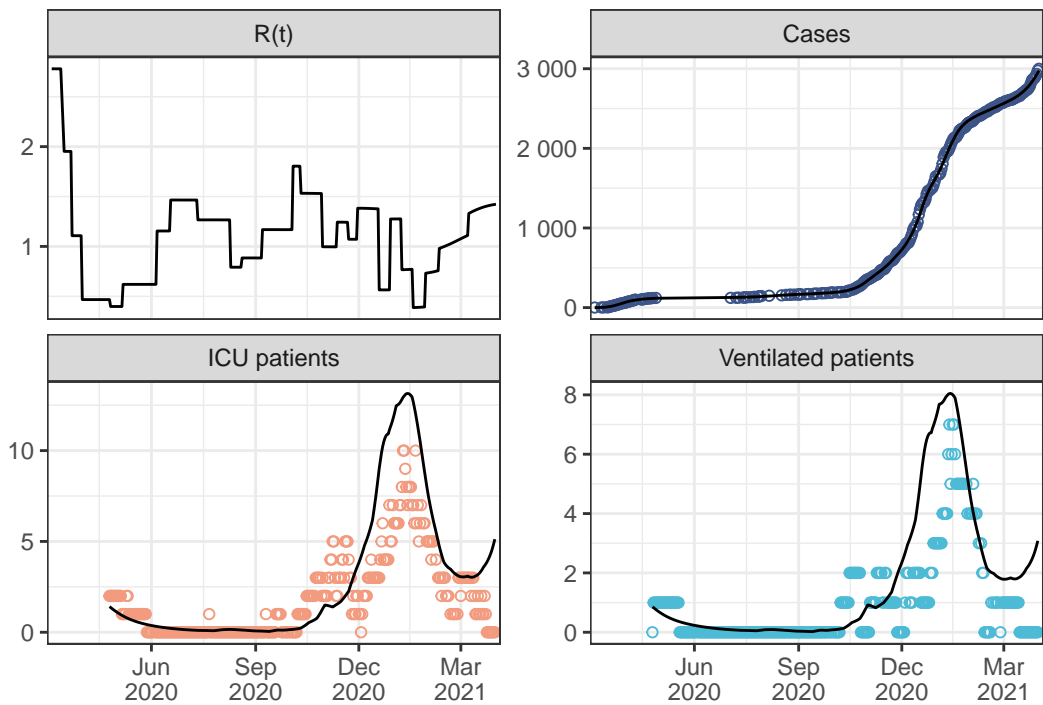

## LK Vogtlandkreis

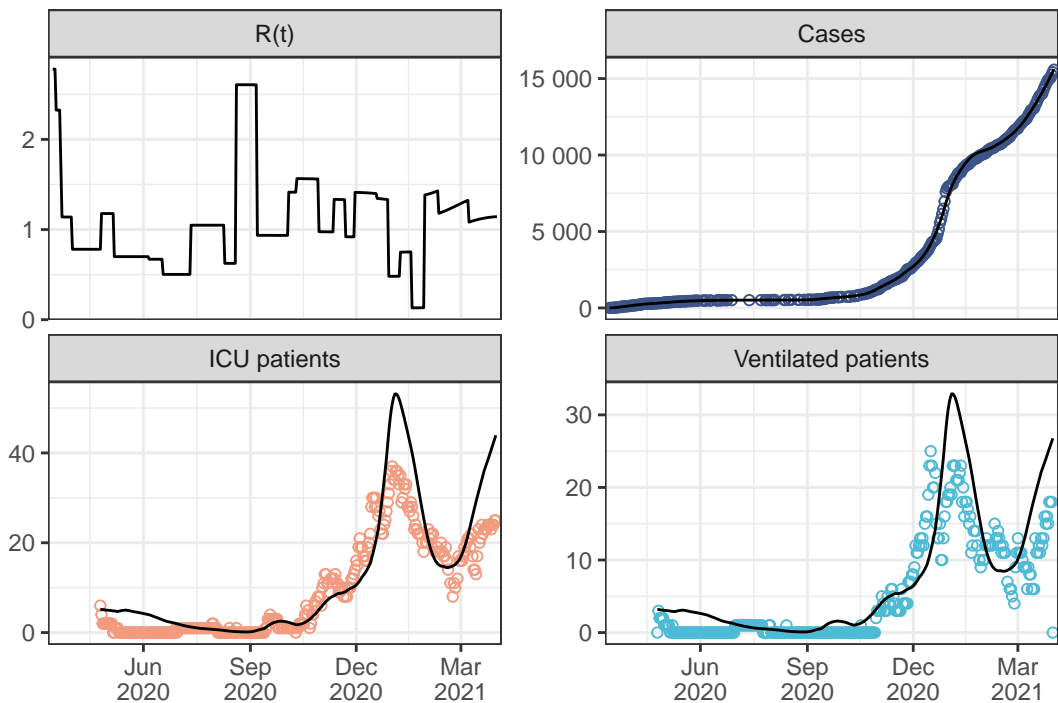

## LK Vorpommern–Greifswald

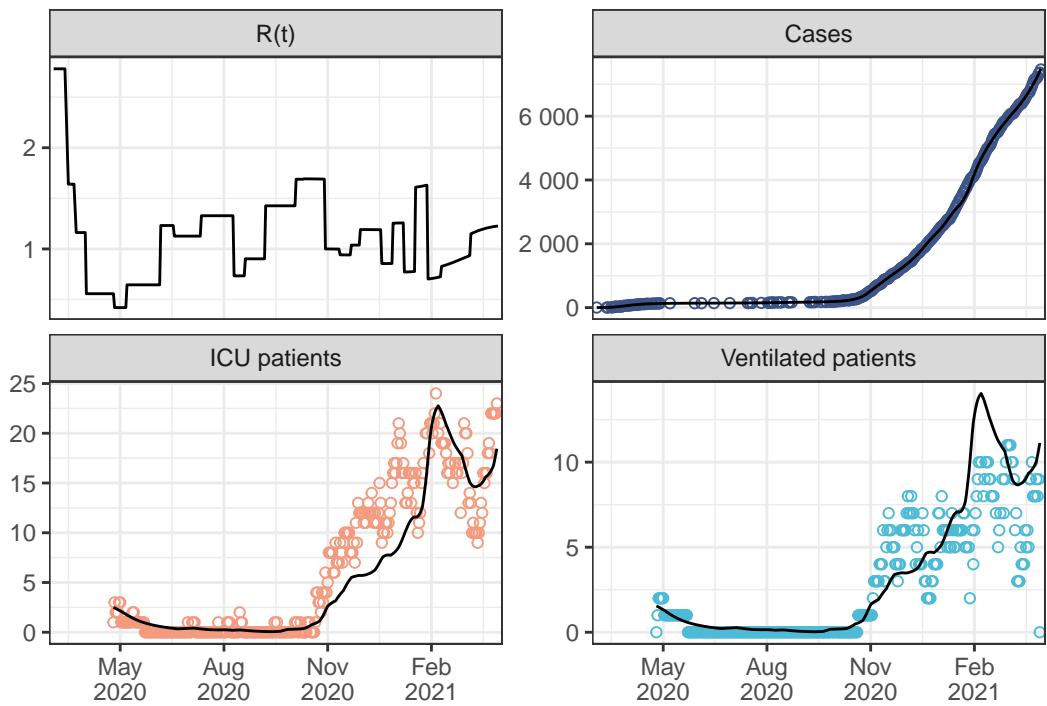

## LK Vorpommern–Rügen

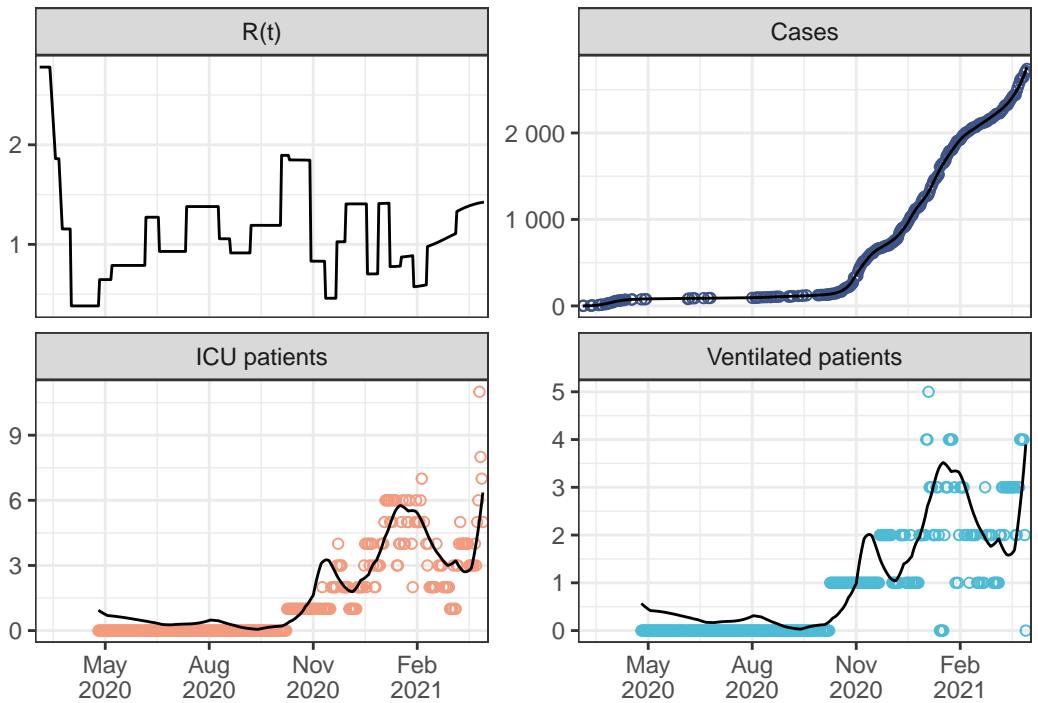

## LK Vulkaneifel

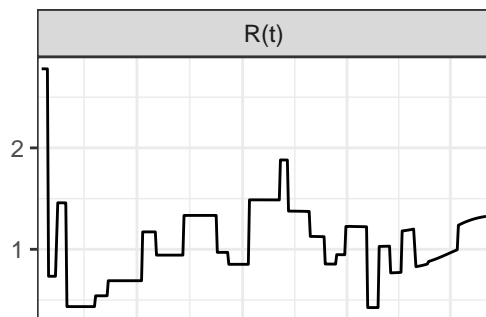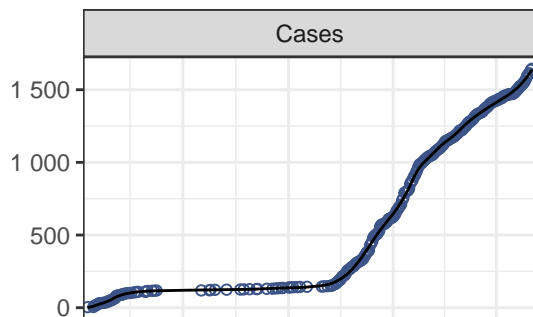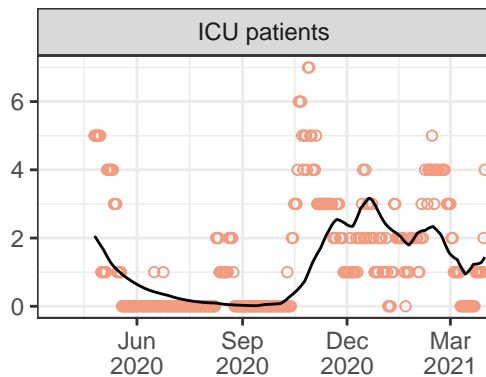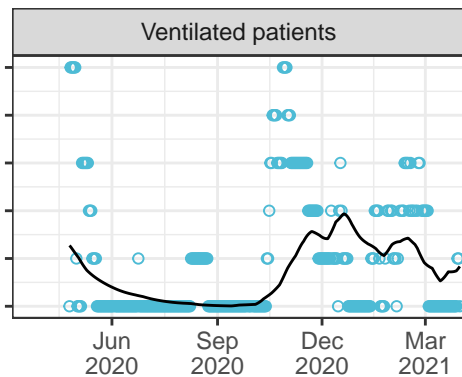

## LK Waldeck–Frankenberg

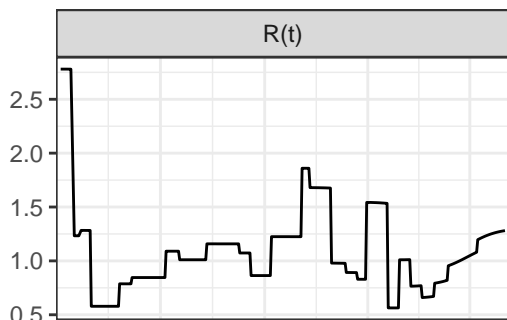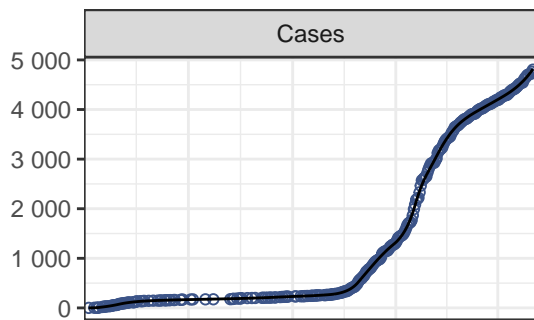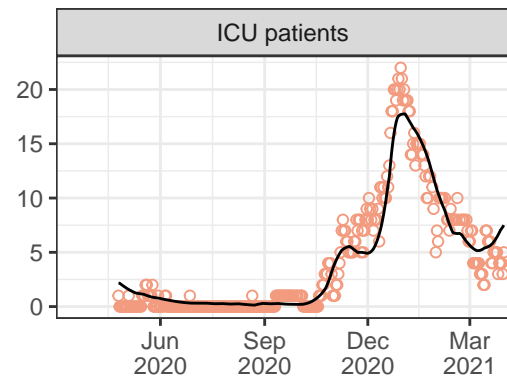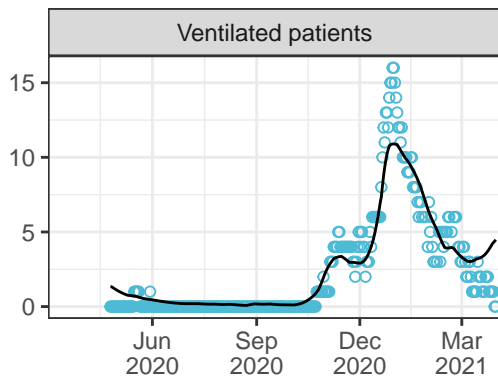

## LK Waldshut

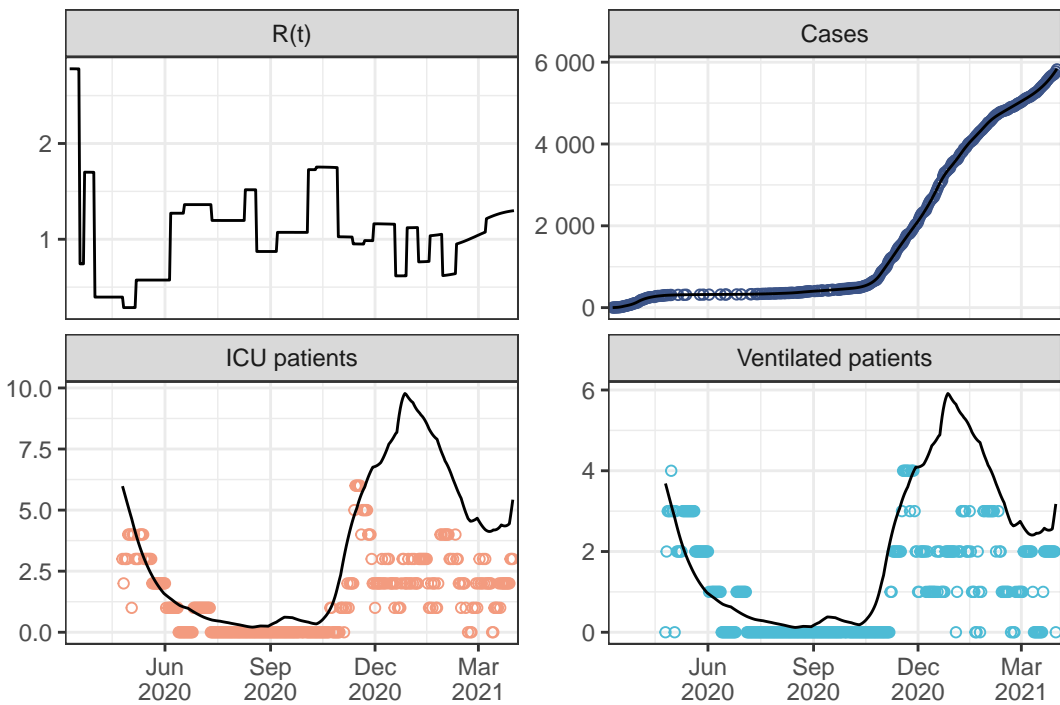

## LK Warendorf

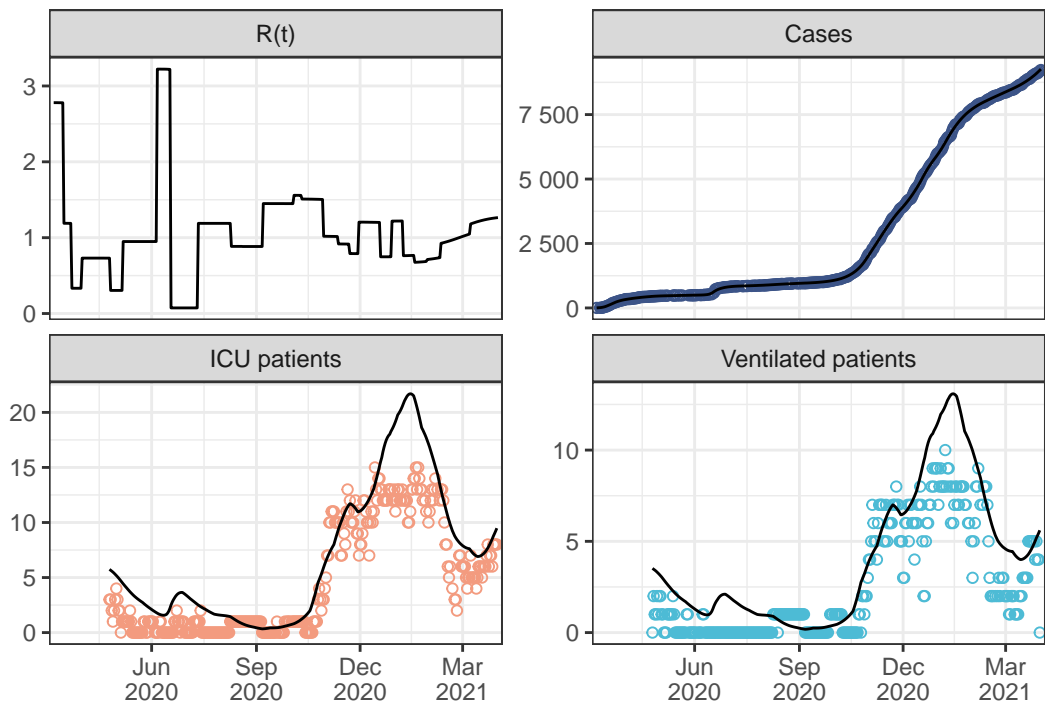

## LK Wartburgkreis

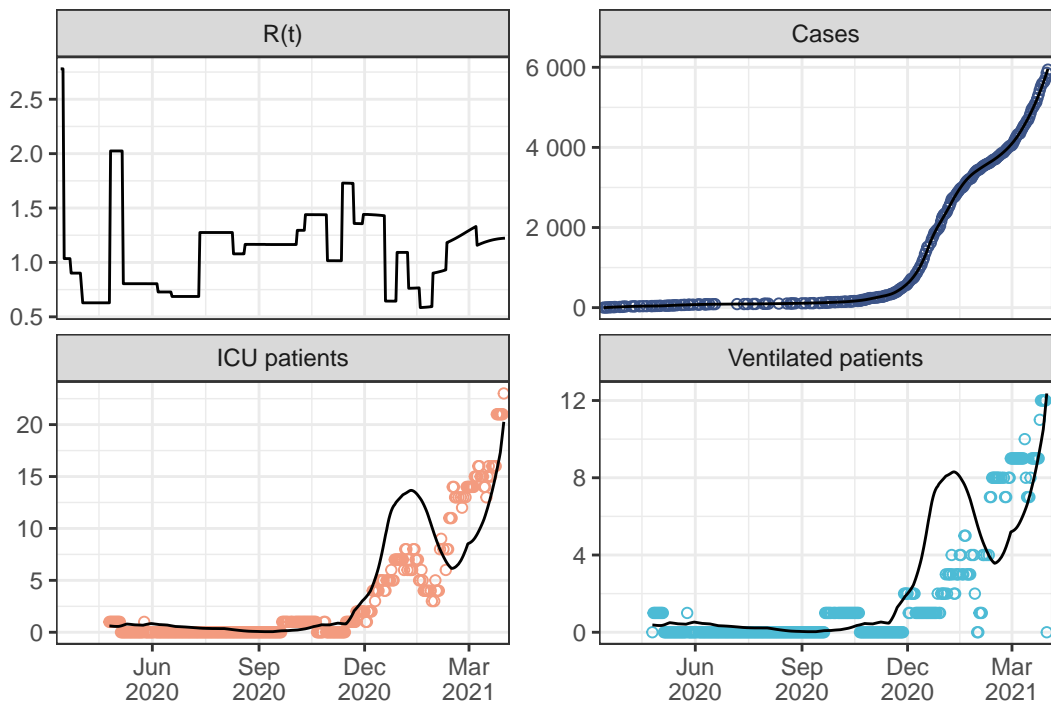

## LK Weißenburg–Gunzenhausen

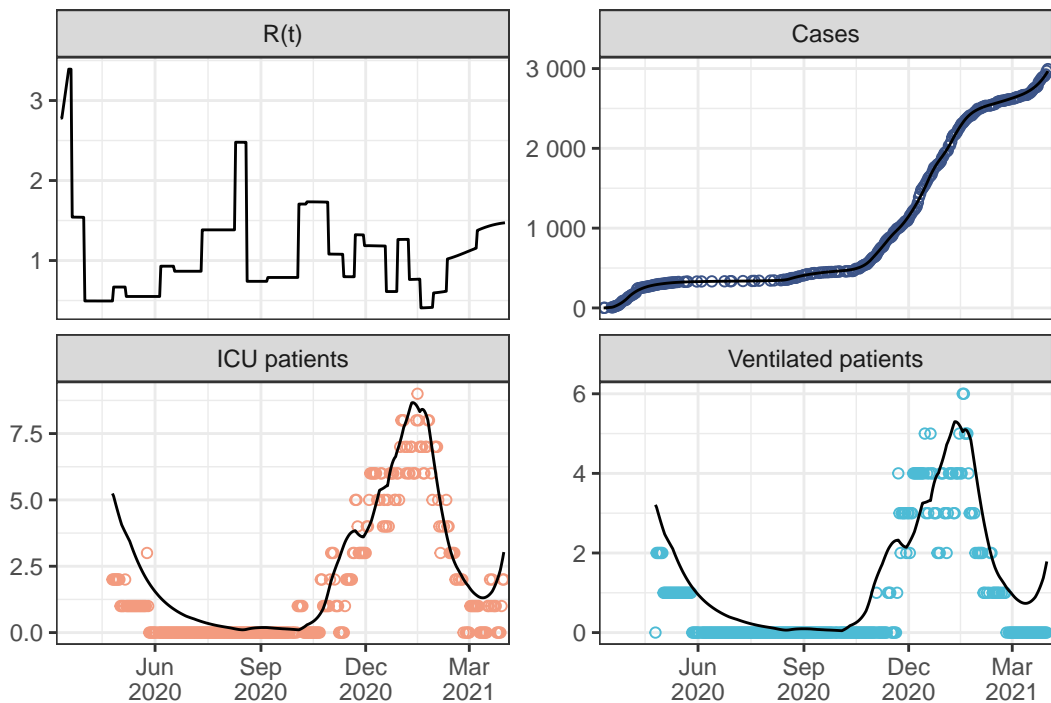

## LK Weilheim–Schongau

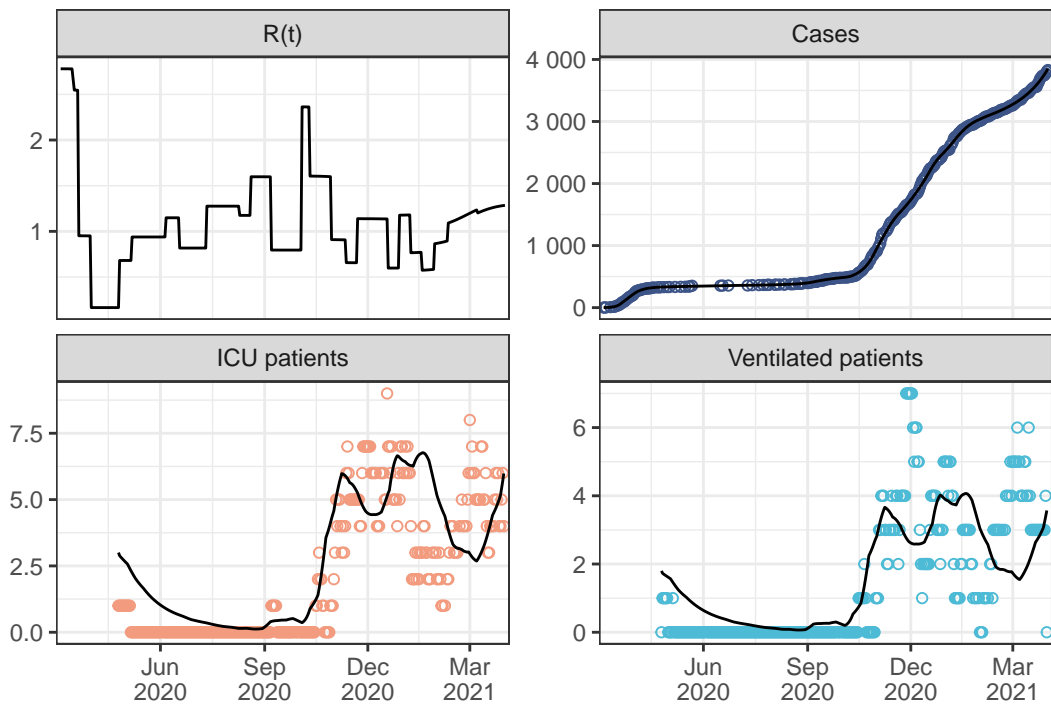

## LK Weimarer Land

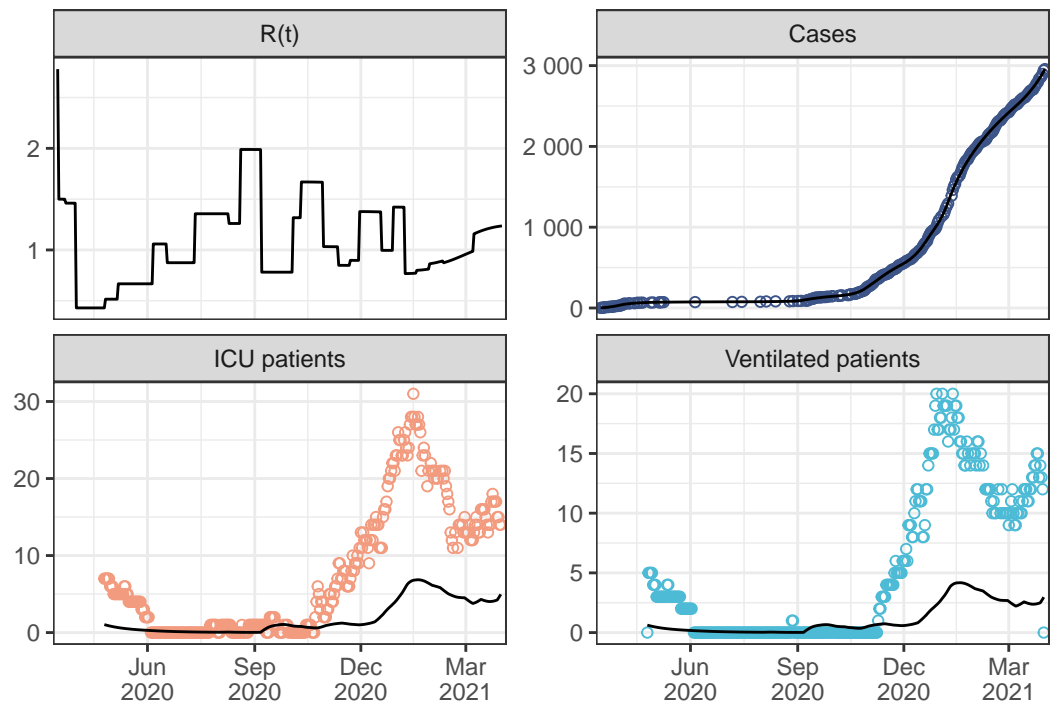

# LK Werra–Meißner–Kreis

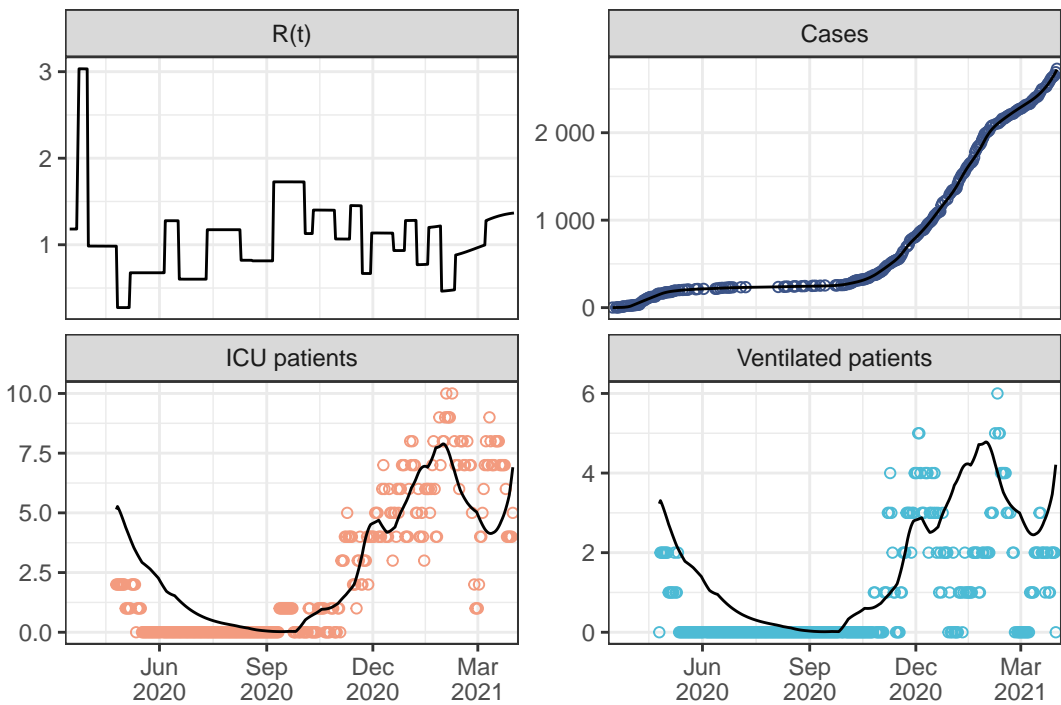

# LK Wesel

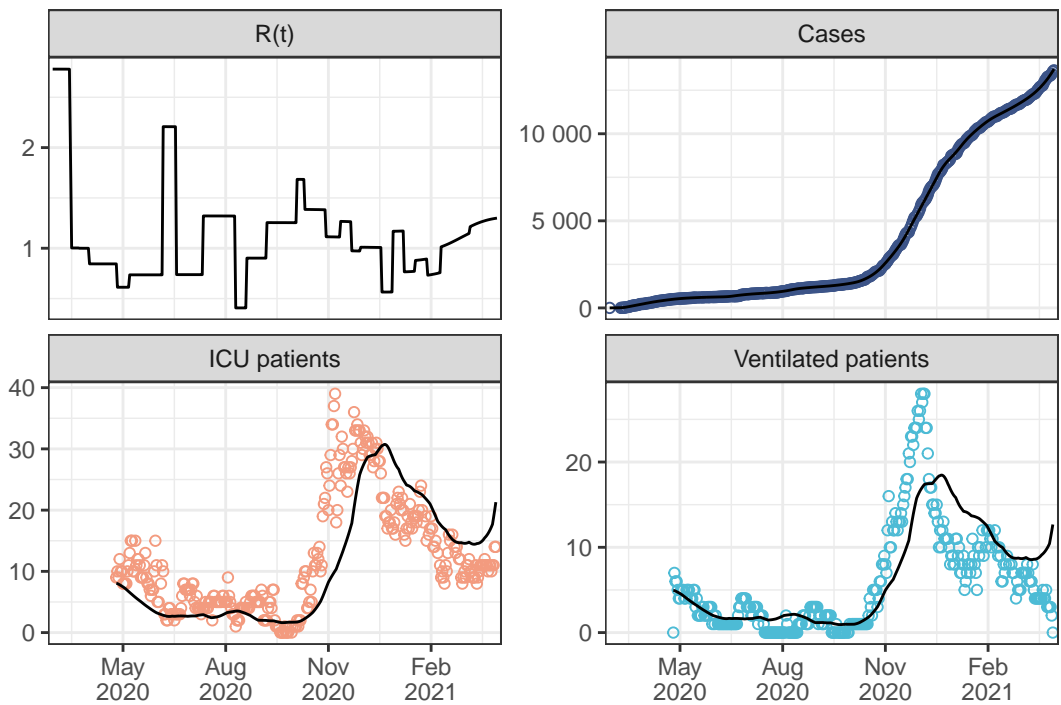

## LK Wesermarsch

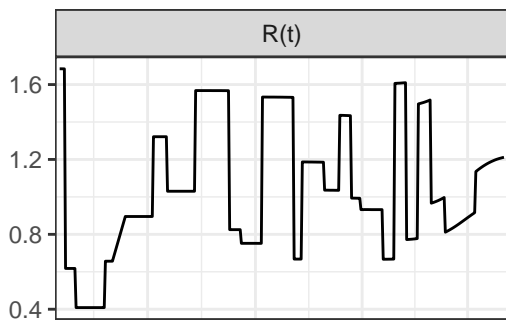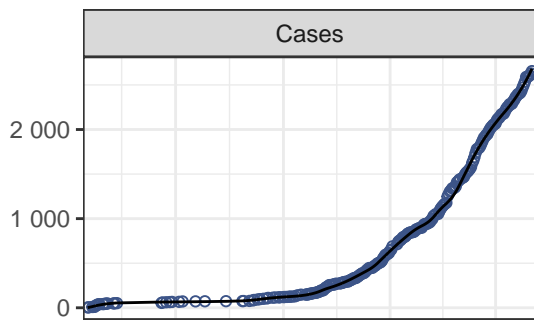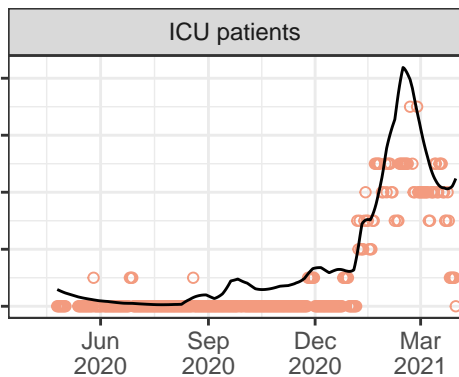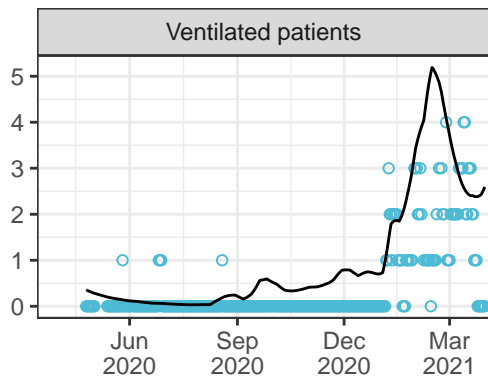

## LK Westerwaldkreis

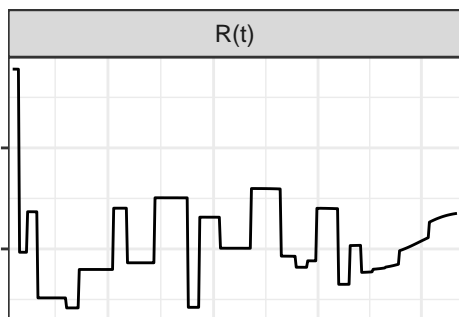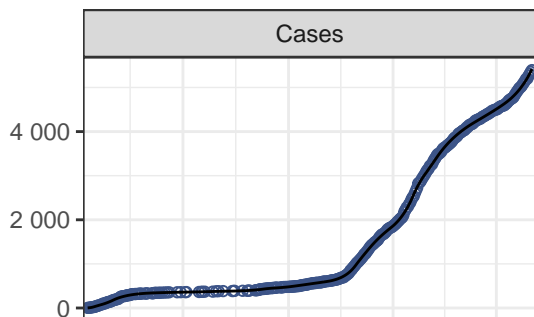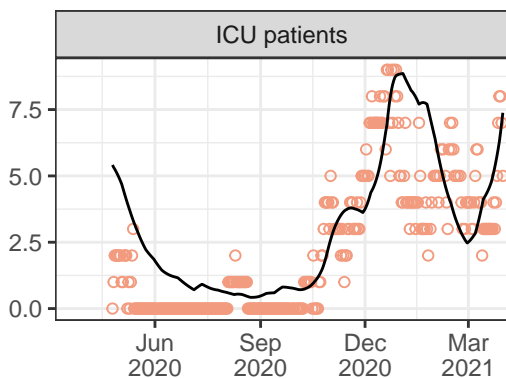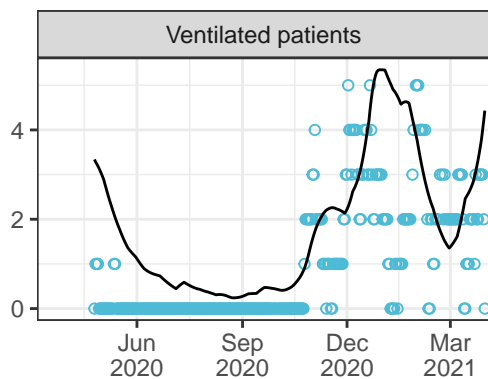

## LK Wetteraukreis

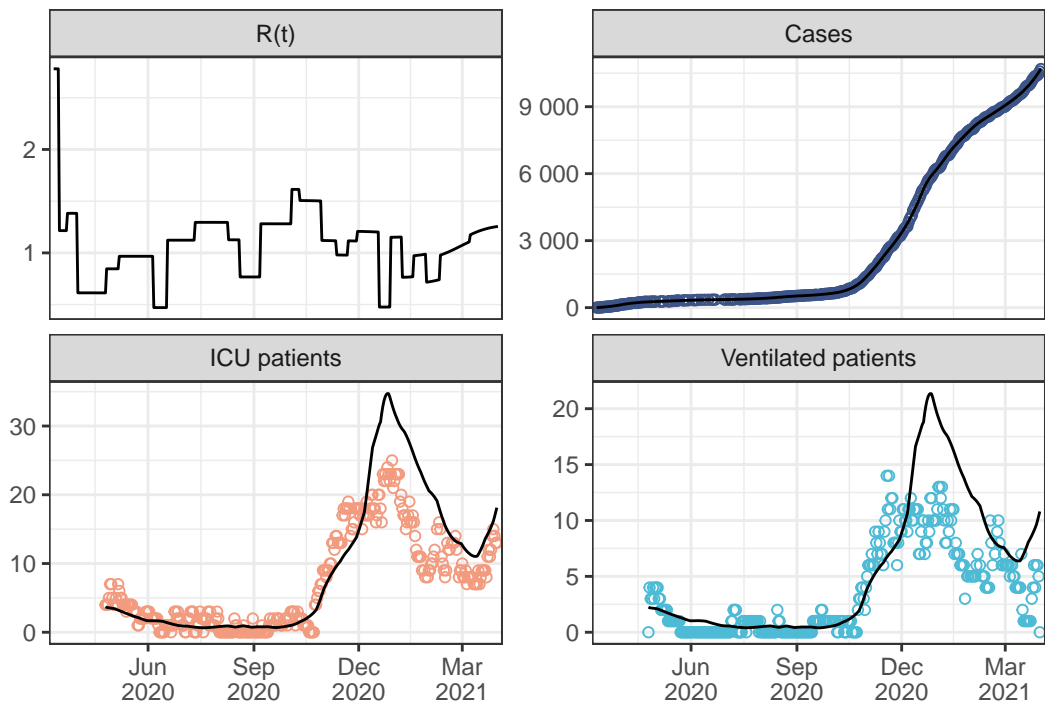

## LK Wittenberg

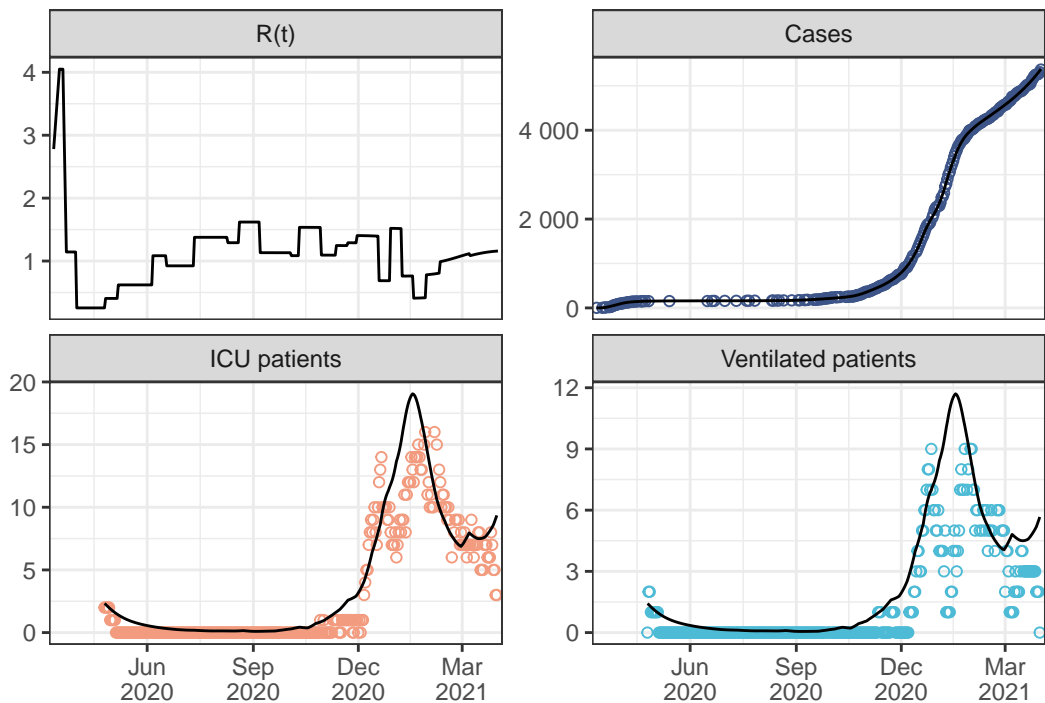

## LK Wittmund

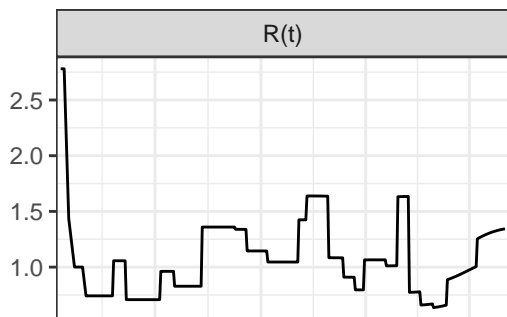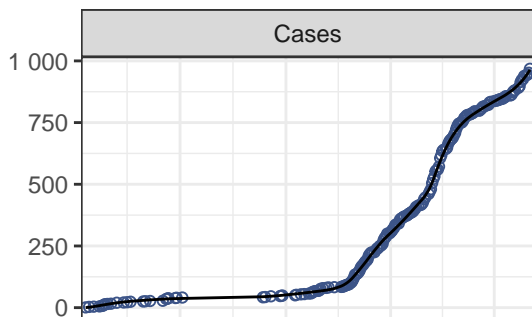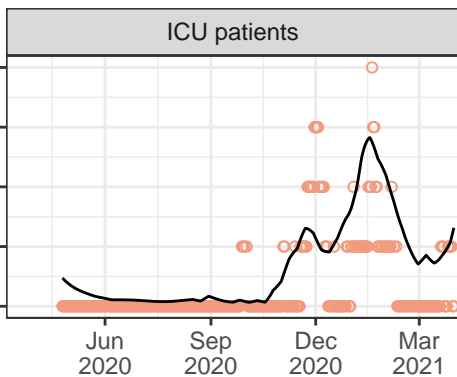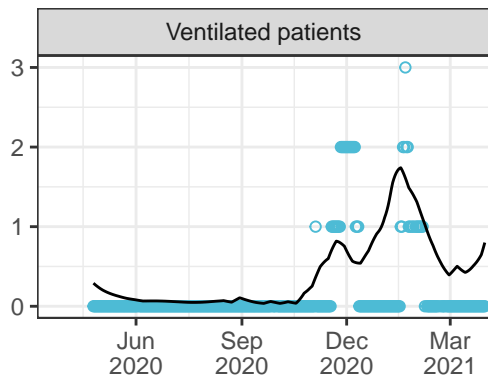

## LK Wolfenbüttel

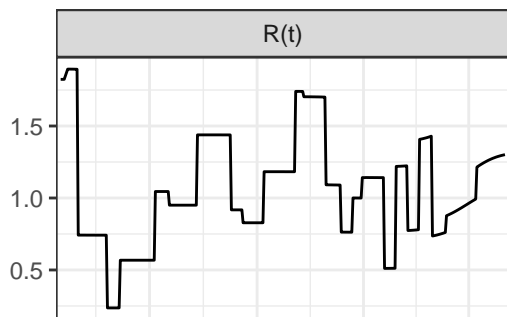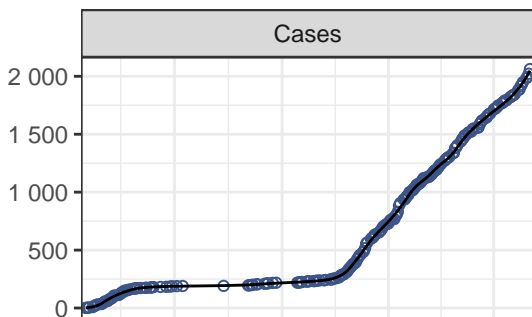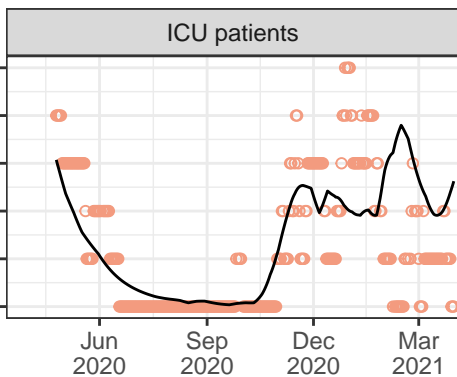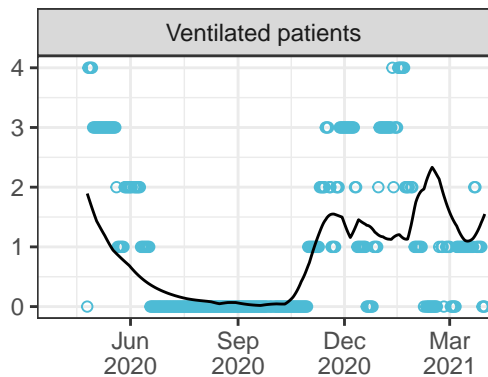

## LK Wunsiedel i.Fichtelgebirge

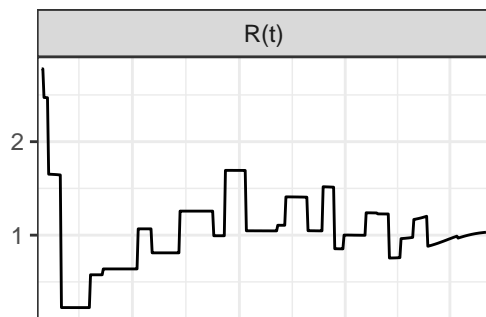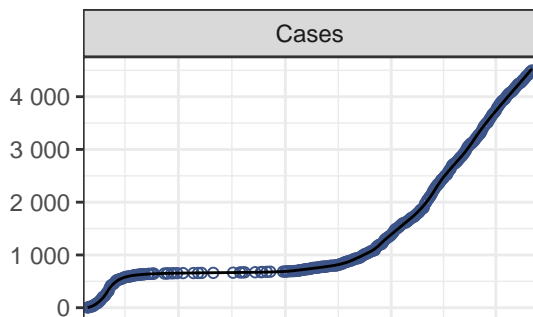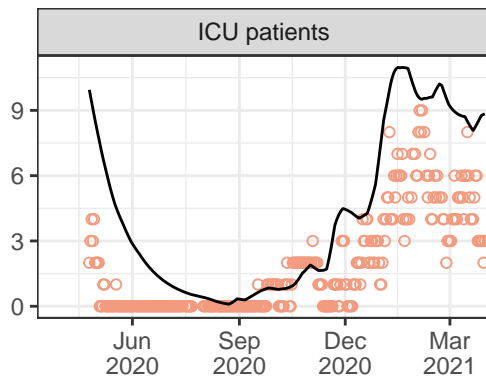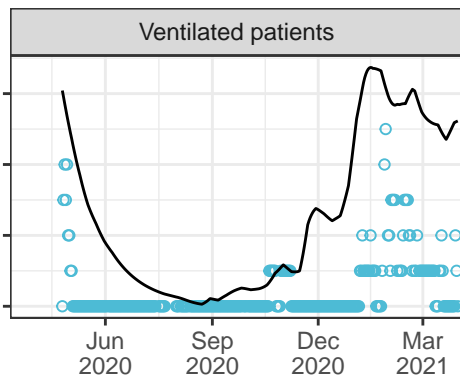

## LK Würzburg

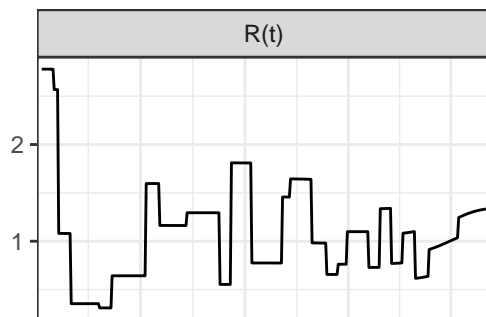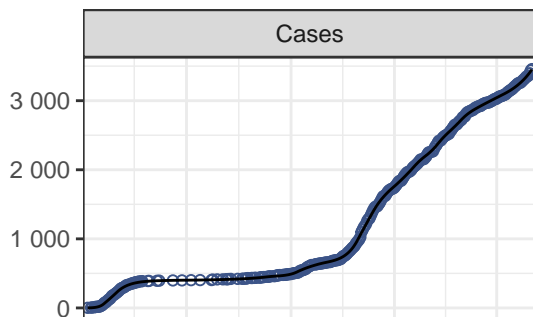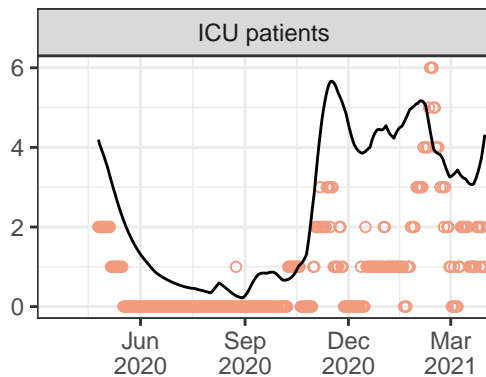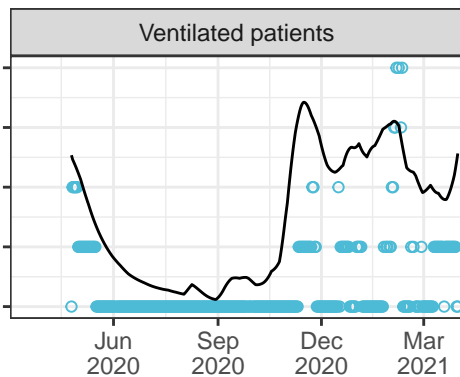

## LK Zollernalbkreis

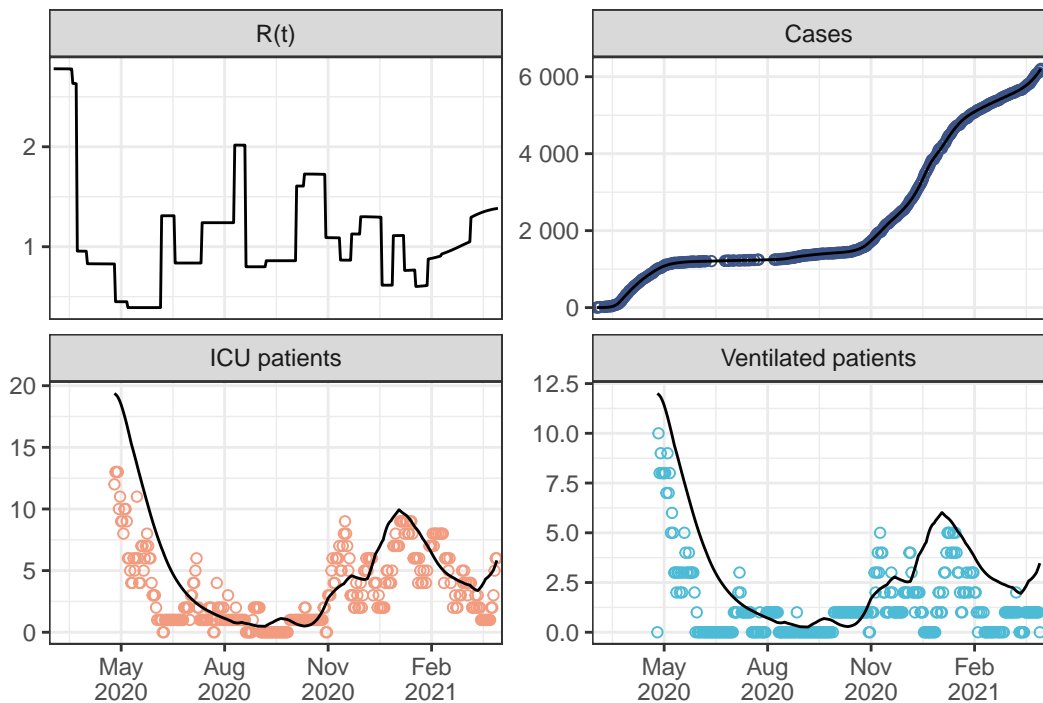

## LK Zwickau

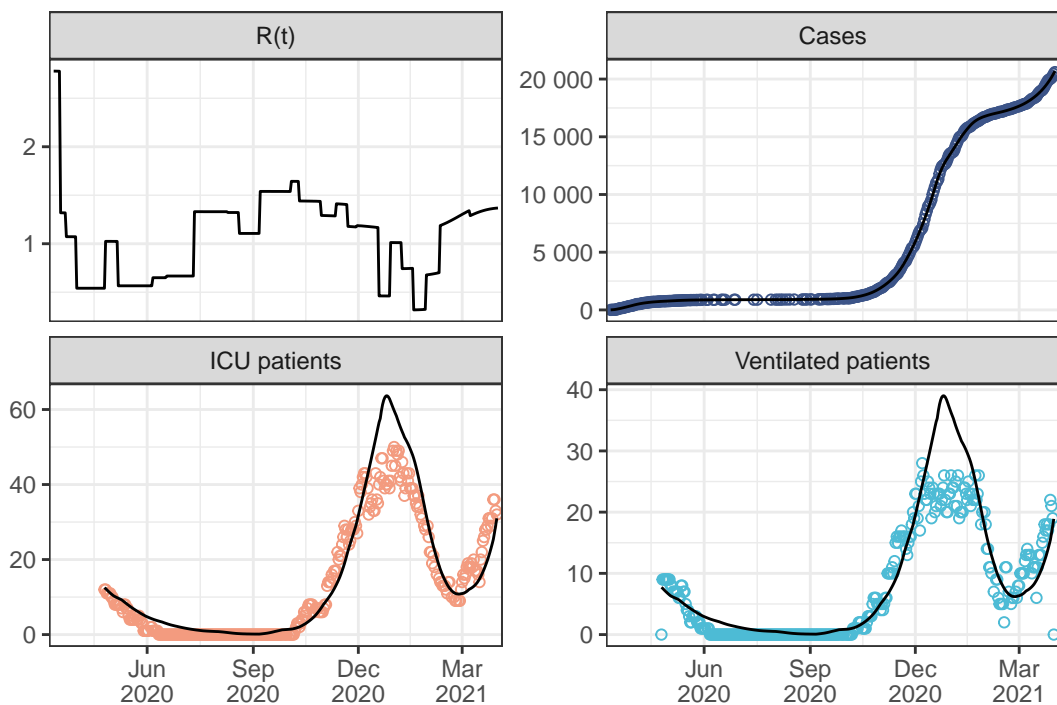

## Region Hannover

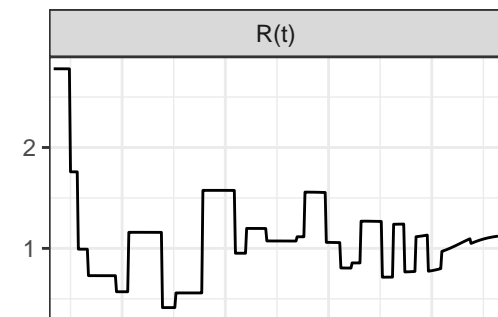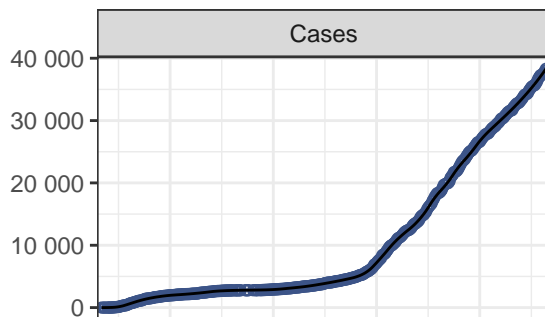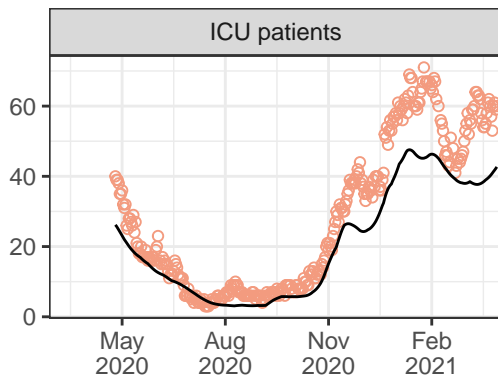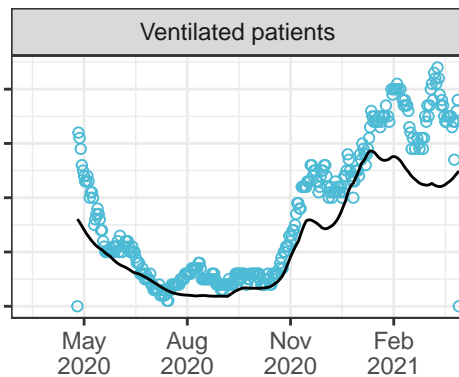

## SK Amberg

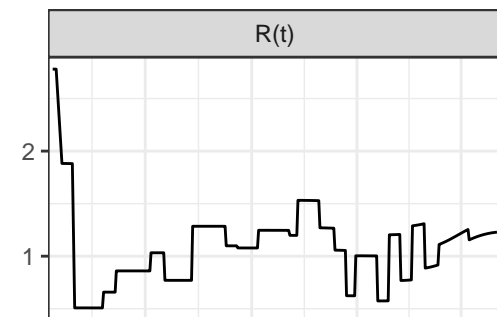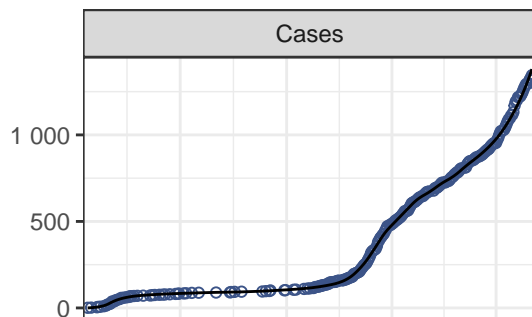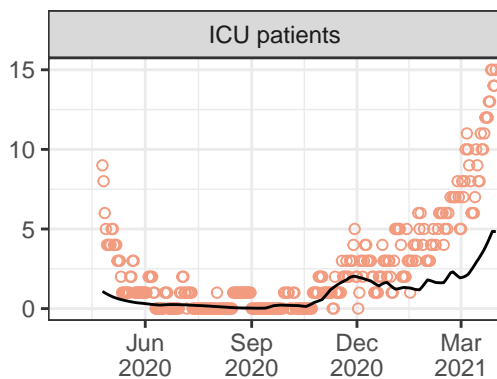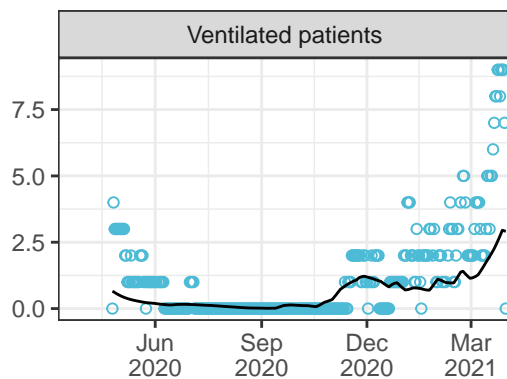

## SK Ansbach

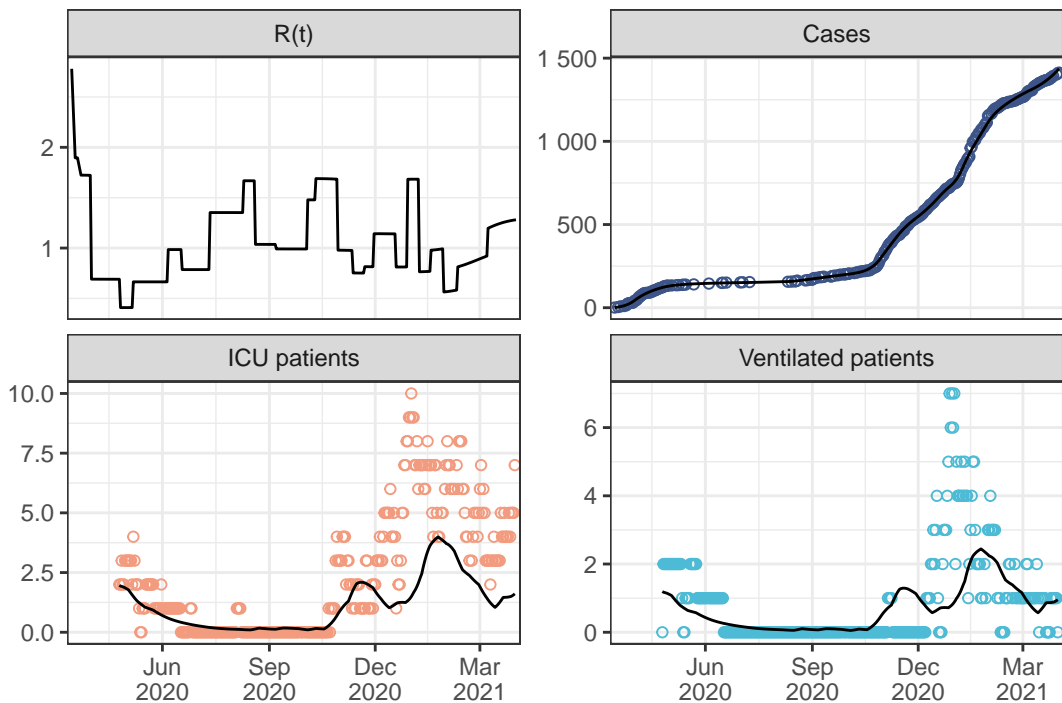

## SK Aschaffenburg

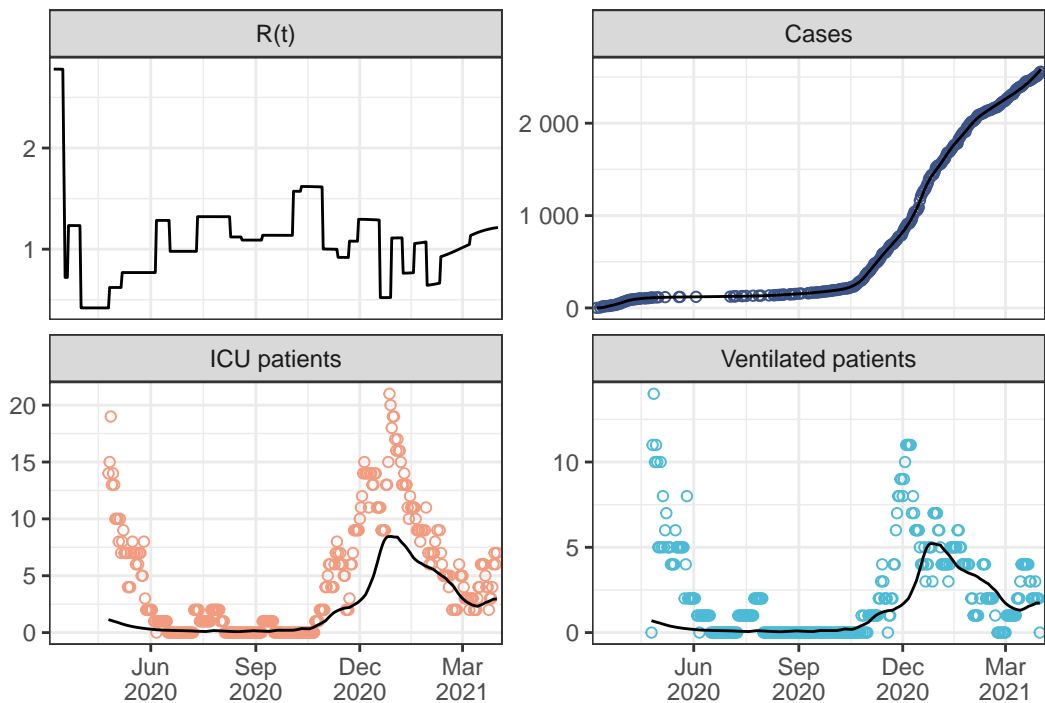

## SK Augsburg

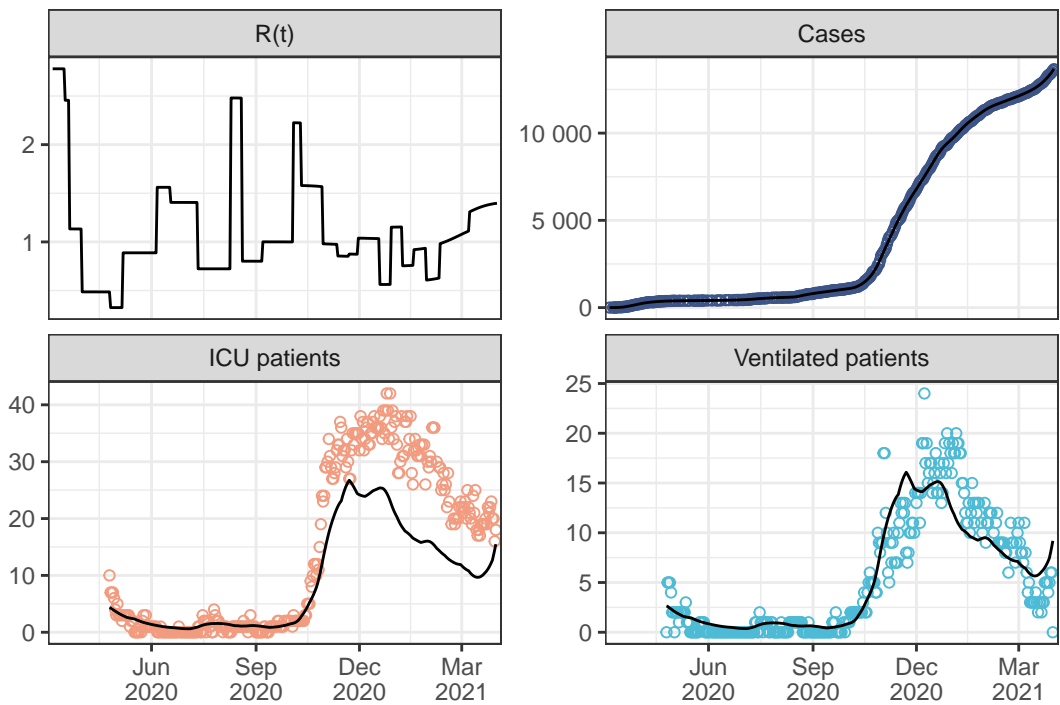

## SK Baden-Baden

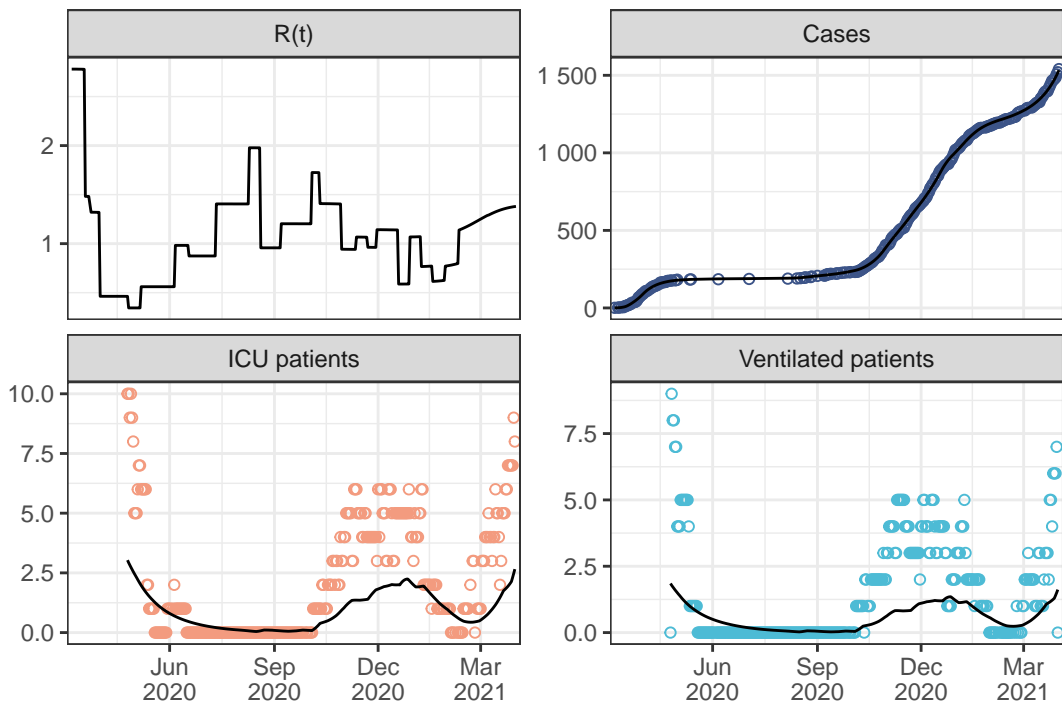

## SK Bamberg

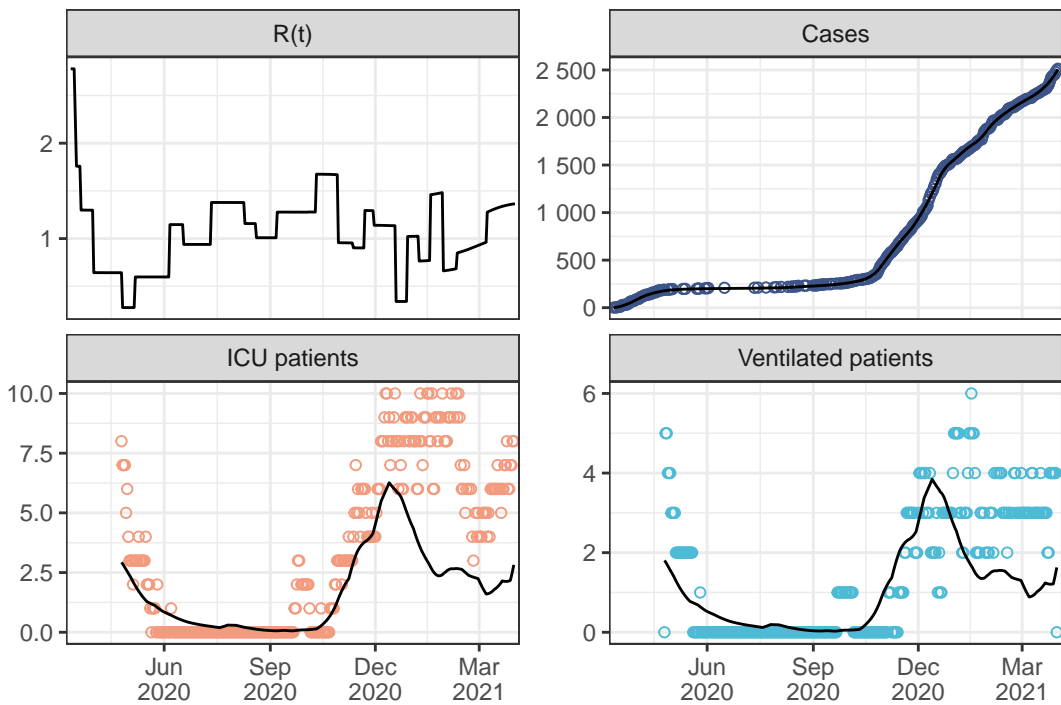

## SK Bayreuth

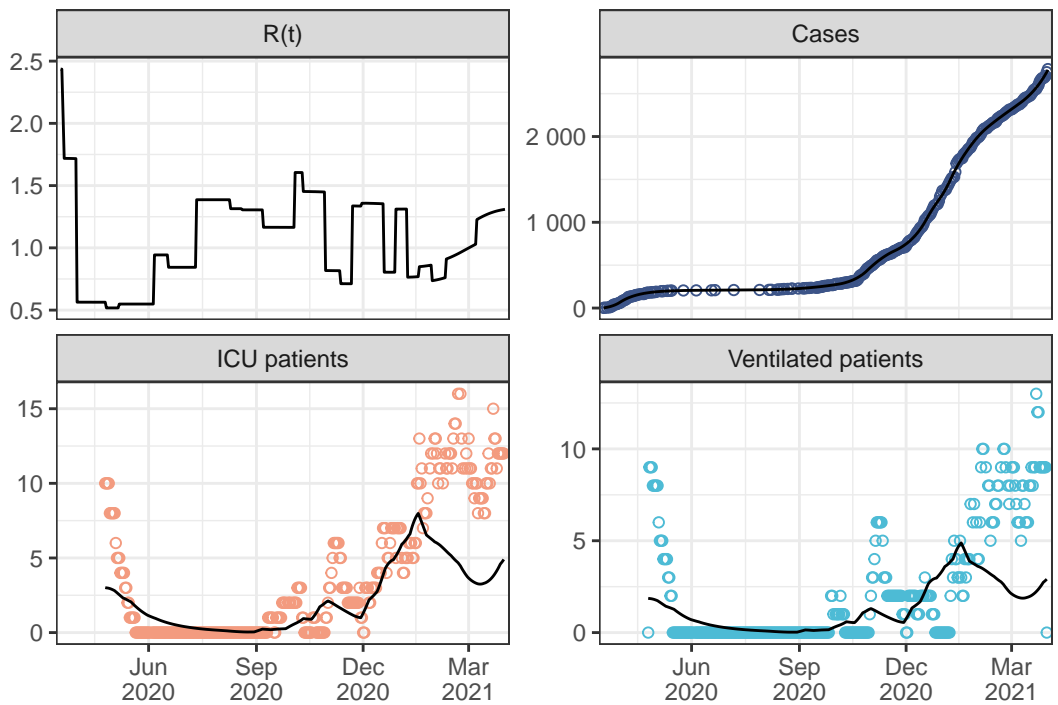

## SK Bielefeld

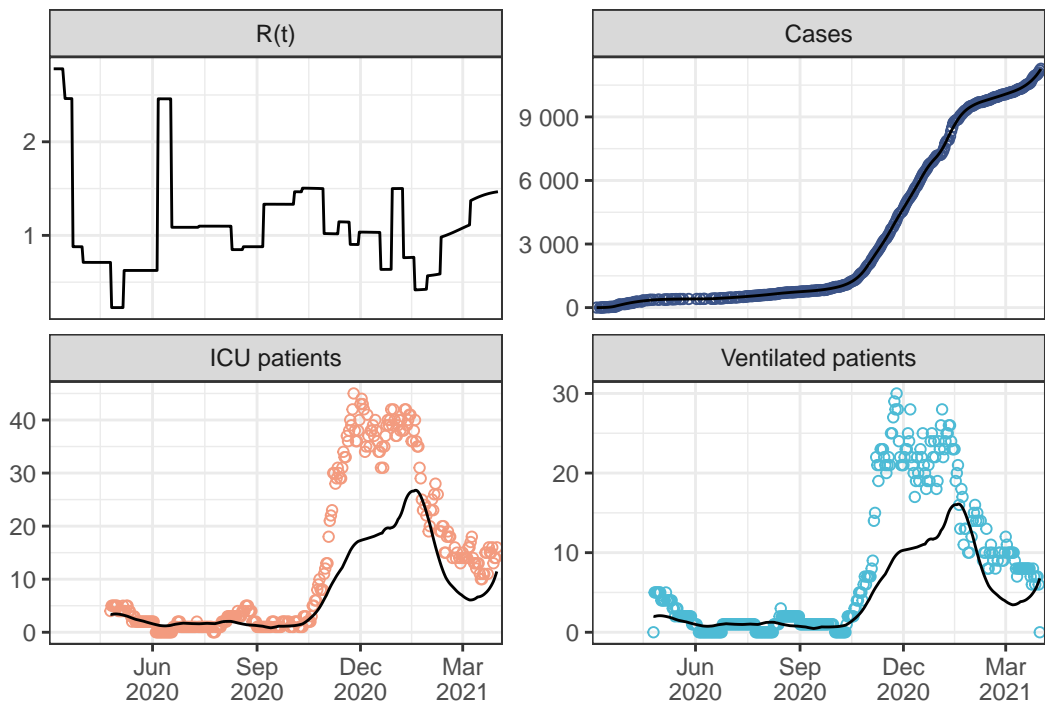

## SK Bochum

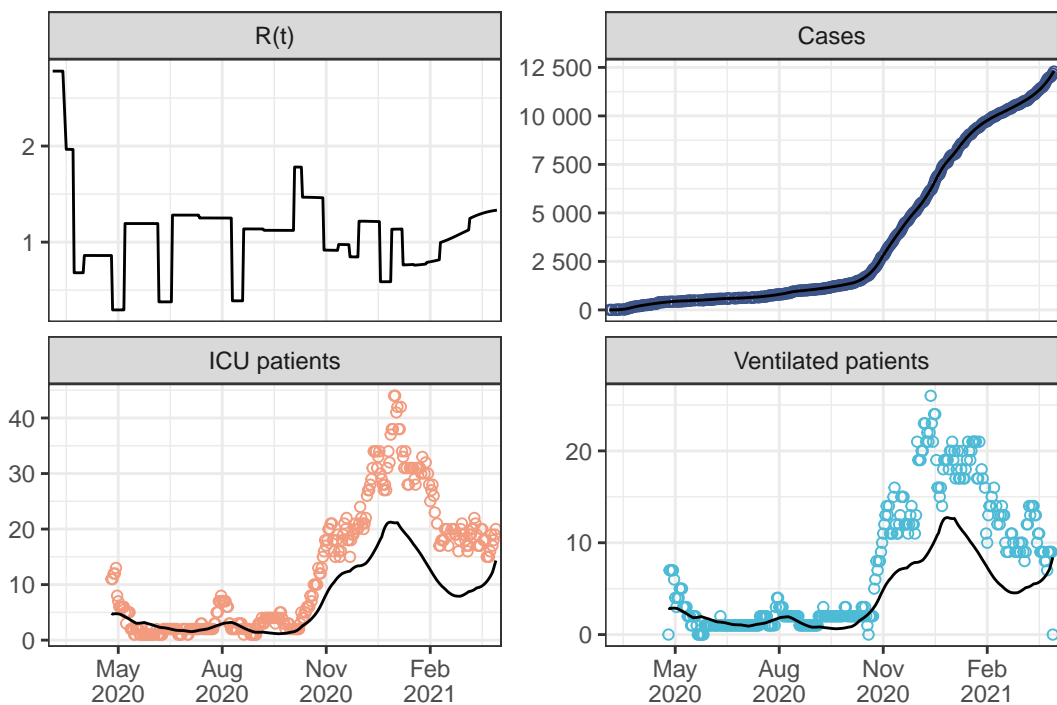

## SK Bonn

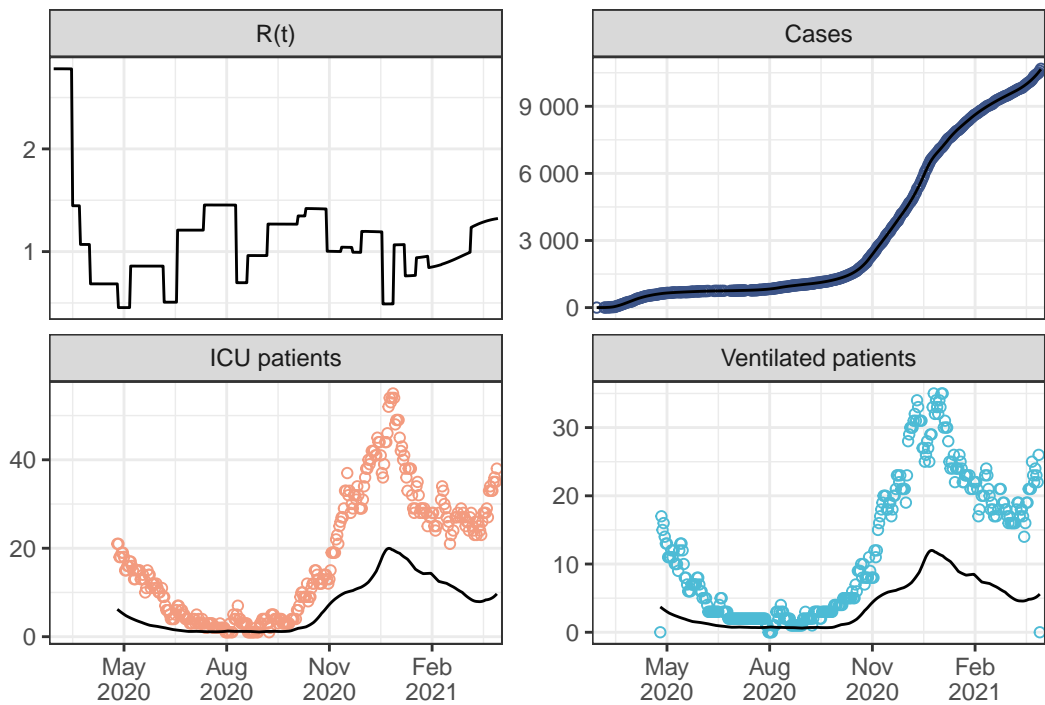

## SK Bottrop

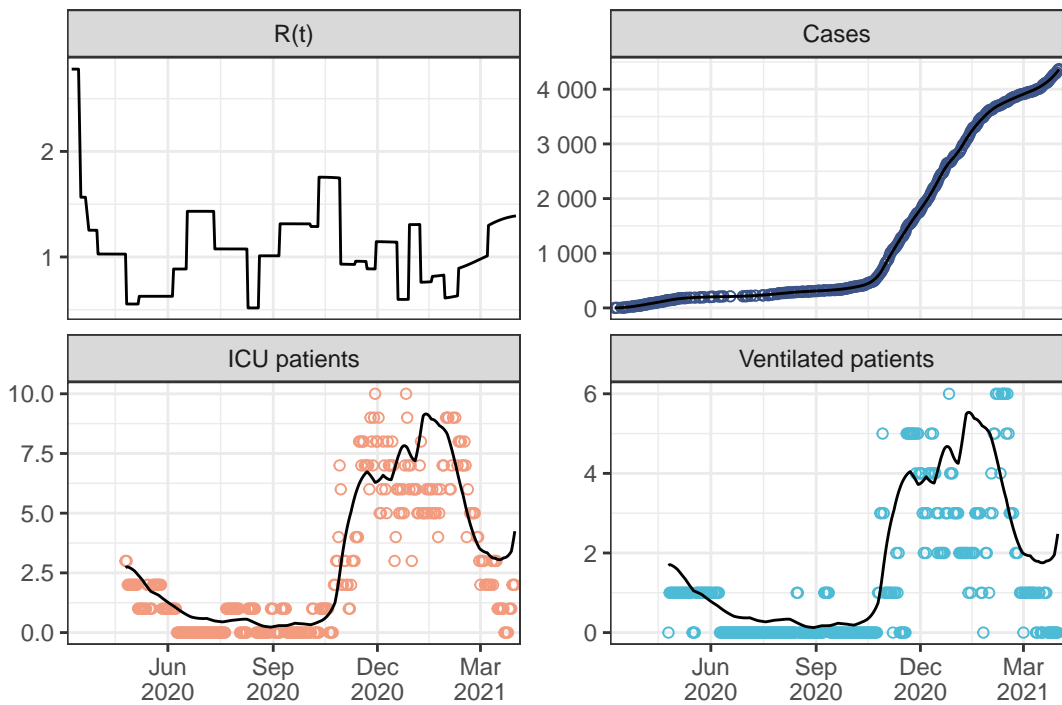

## SK Brandenburg a.d.Havel

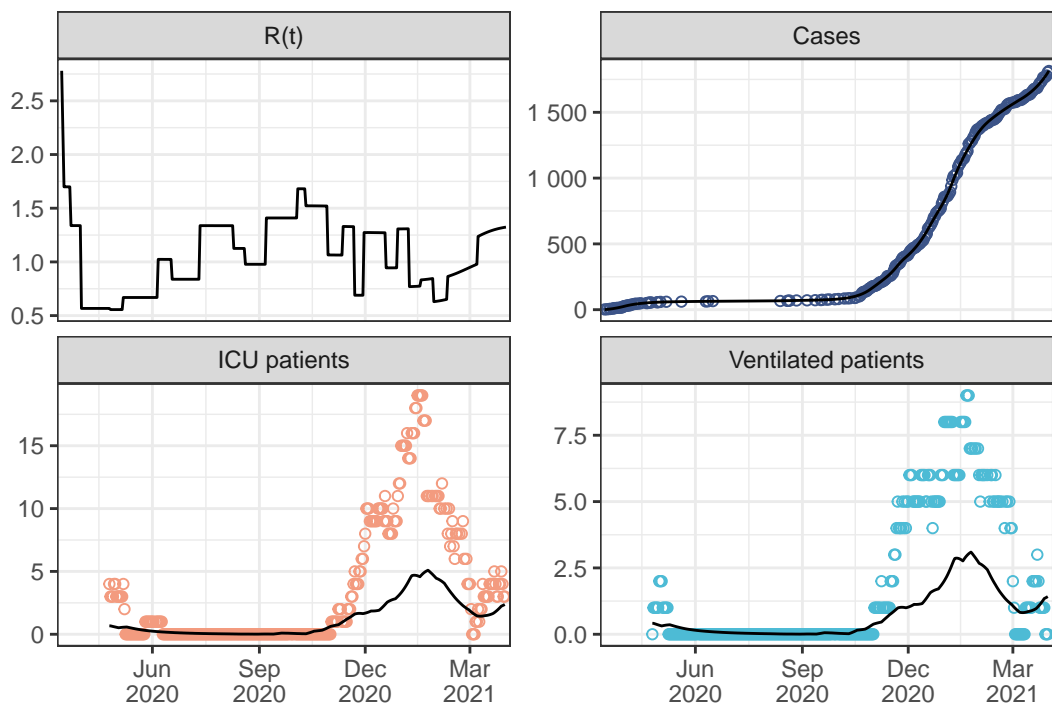

## SK Braunschweig

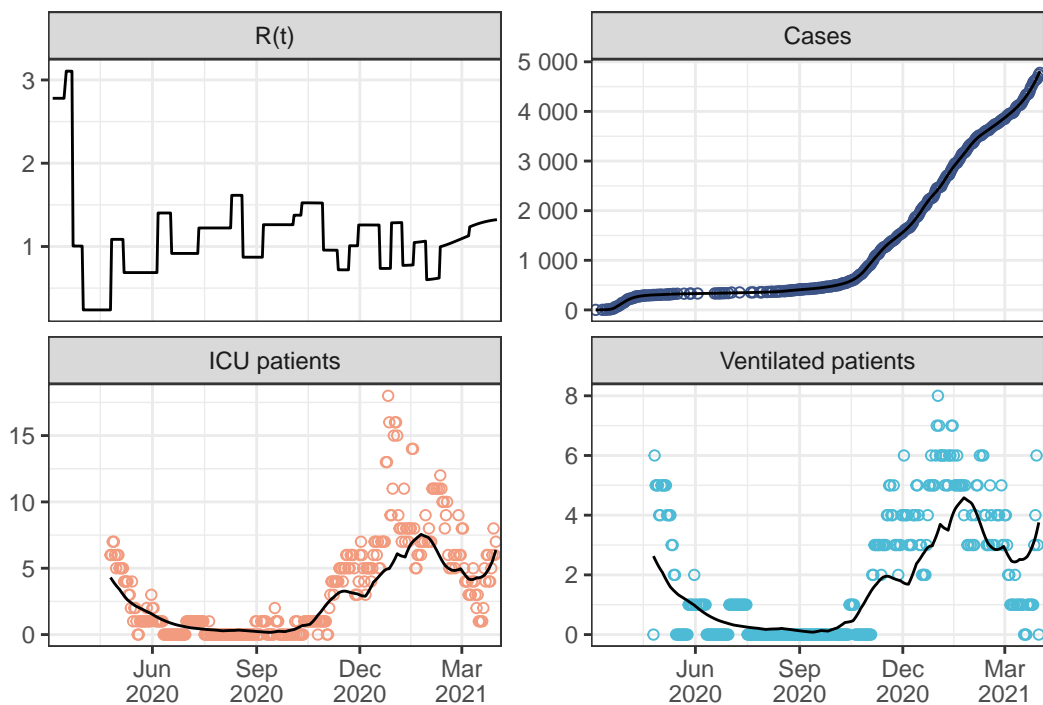

SK Bremen

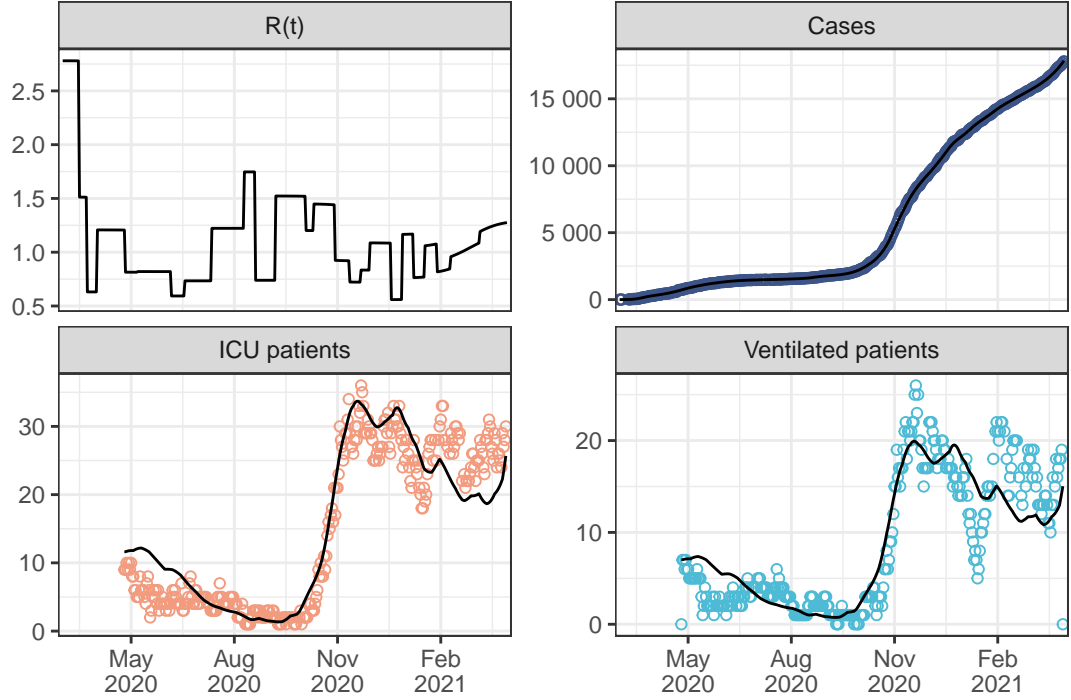

SK Bremerhaven

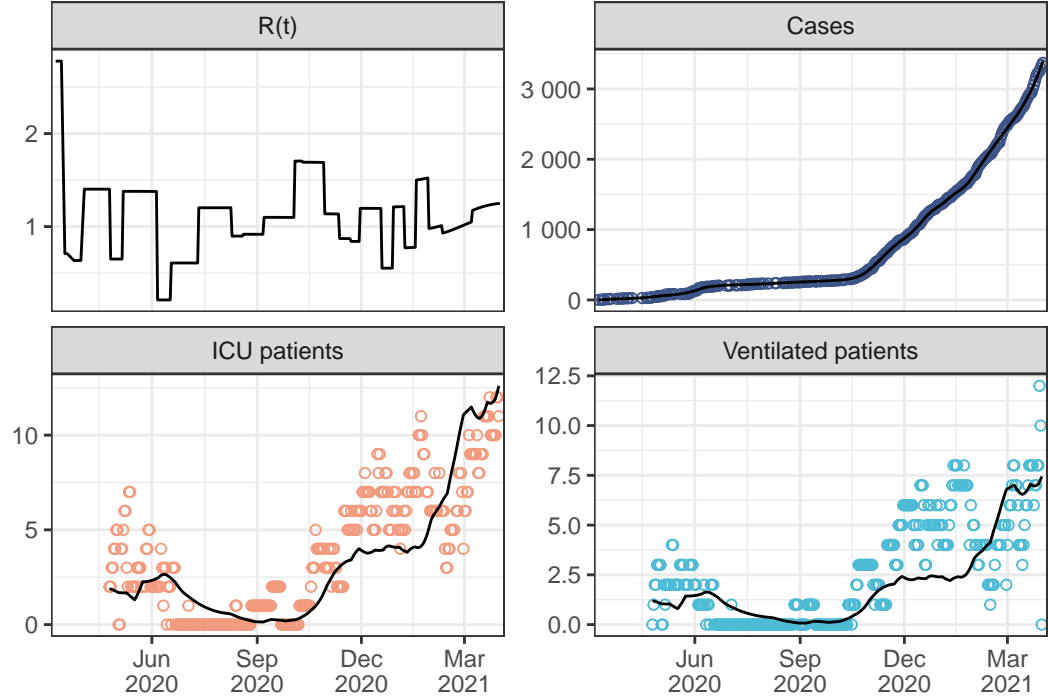

## SK Chemnitz

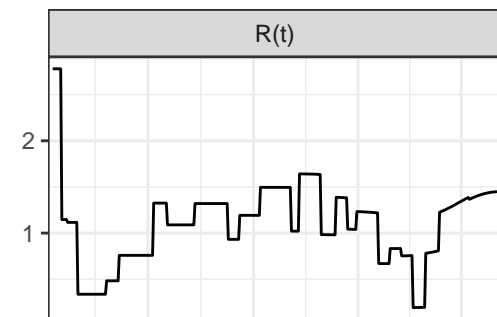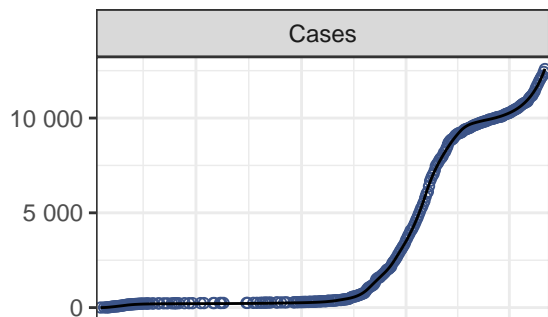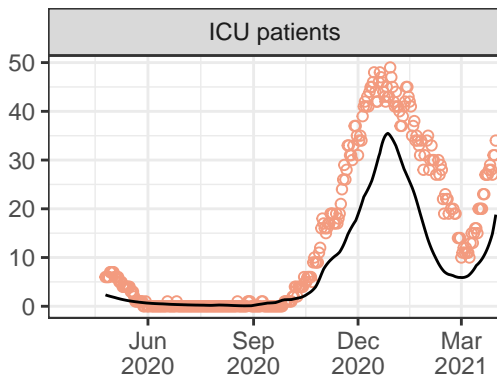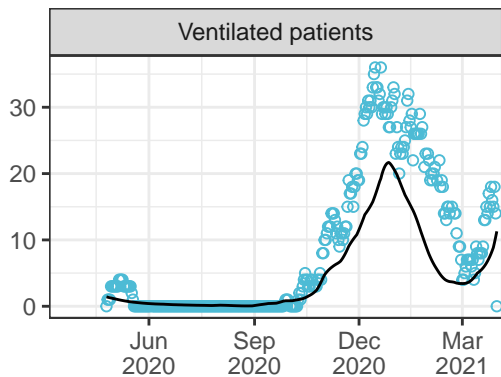

## SK Coburg

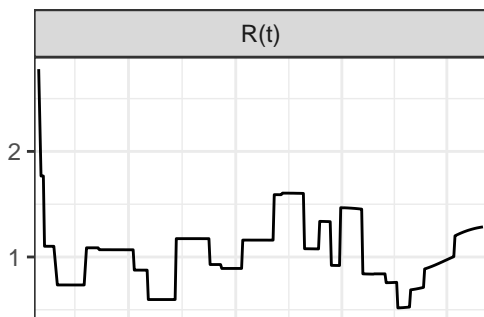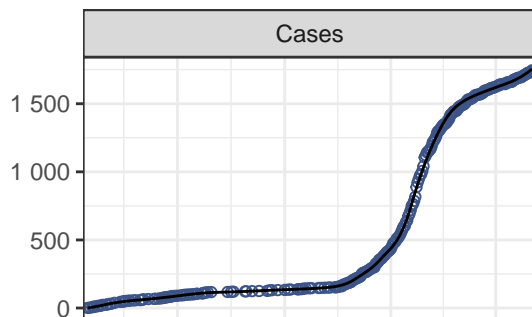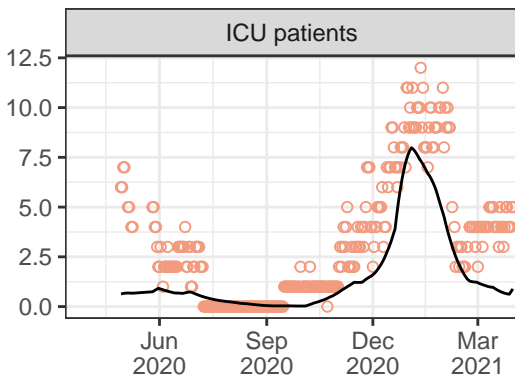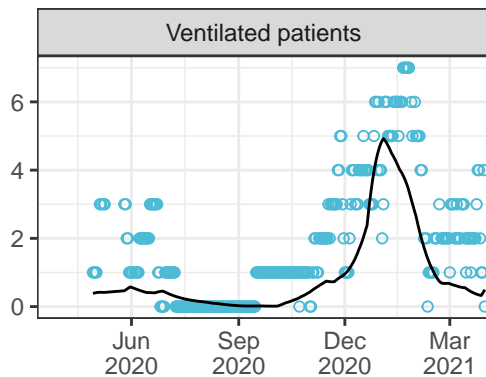

## SK Cottbus

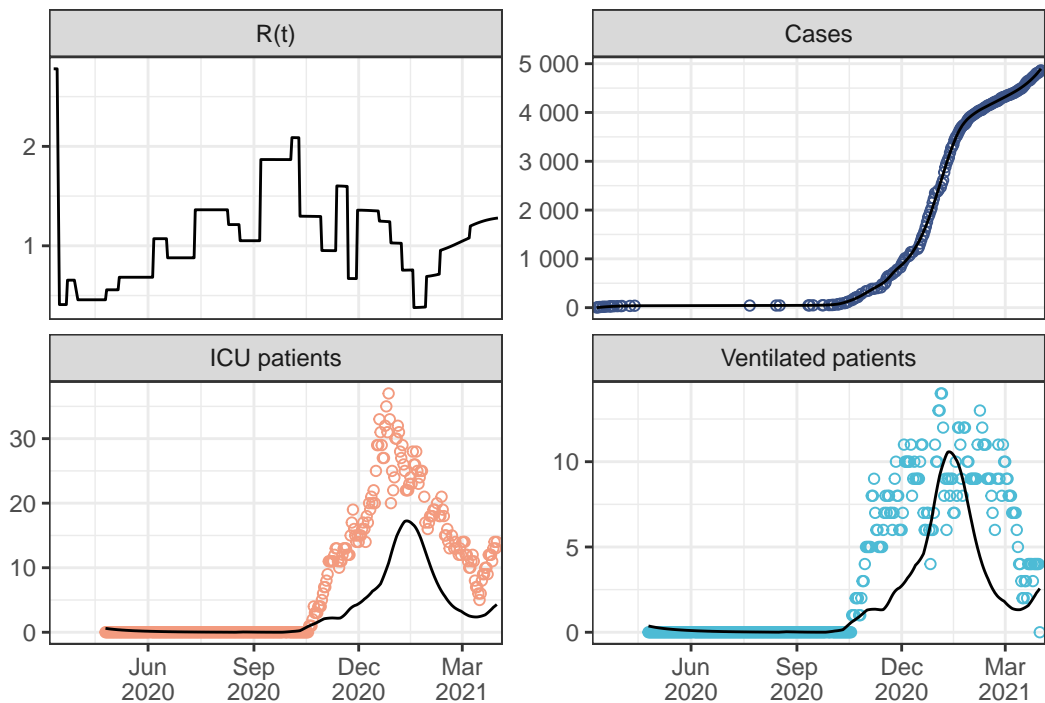

## SK Darmstadt

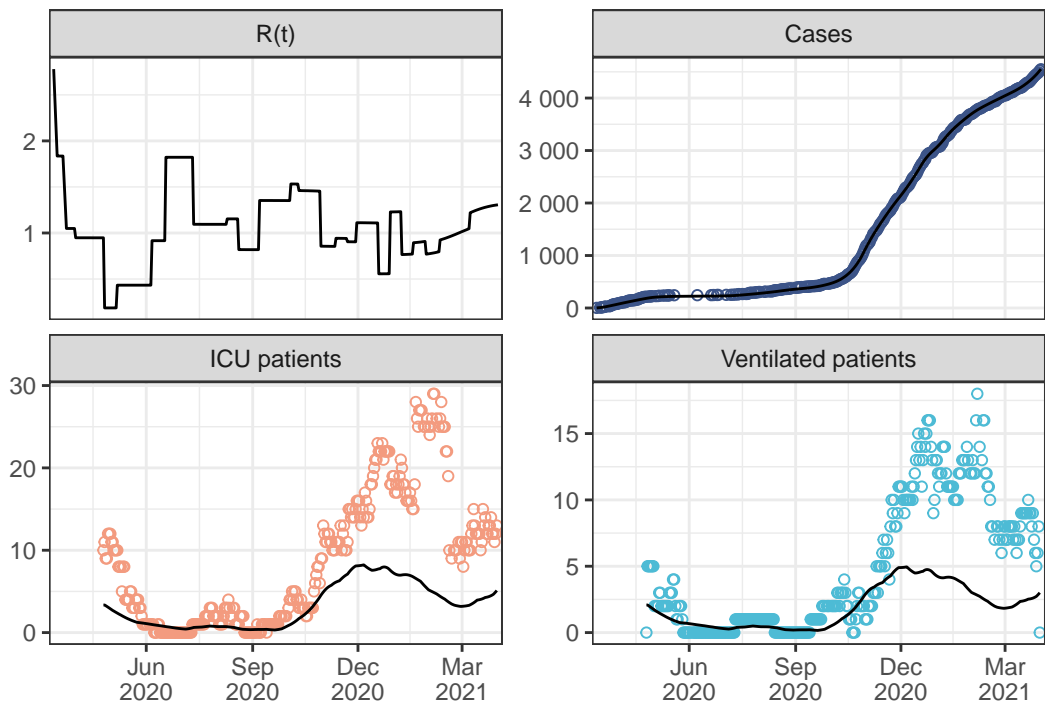

## SK Delmenhorst

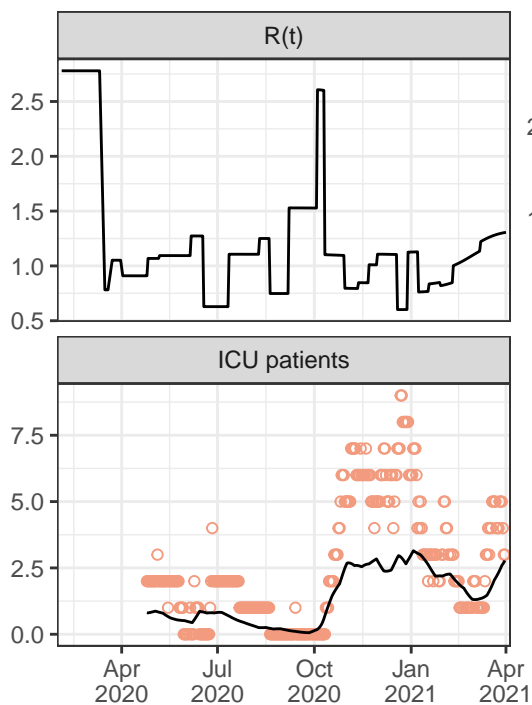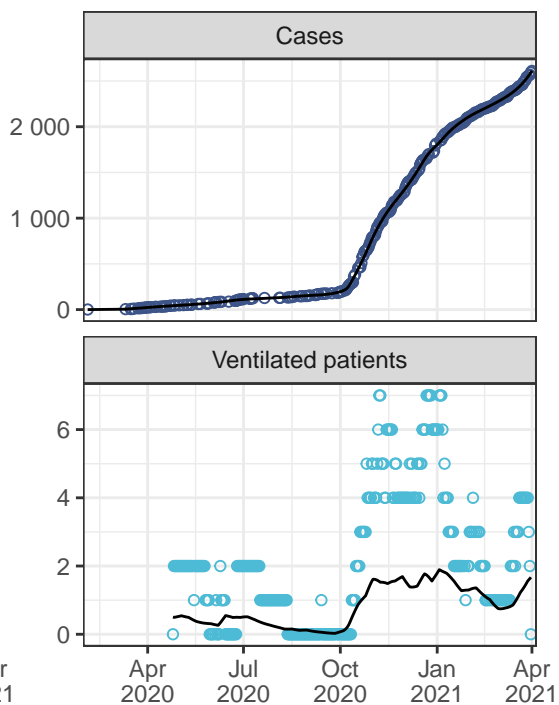

## SK Dessau-Roßlau

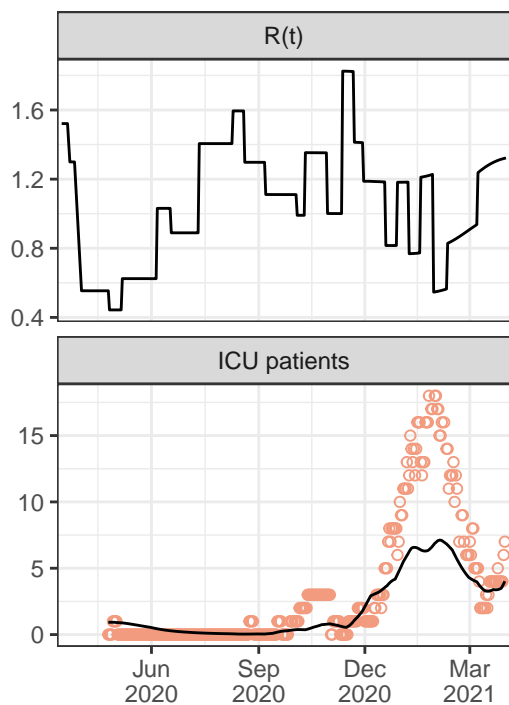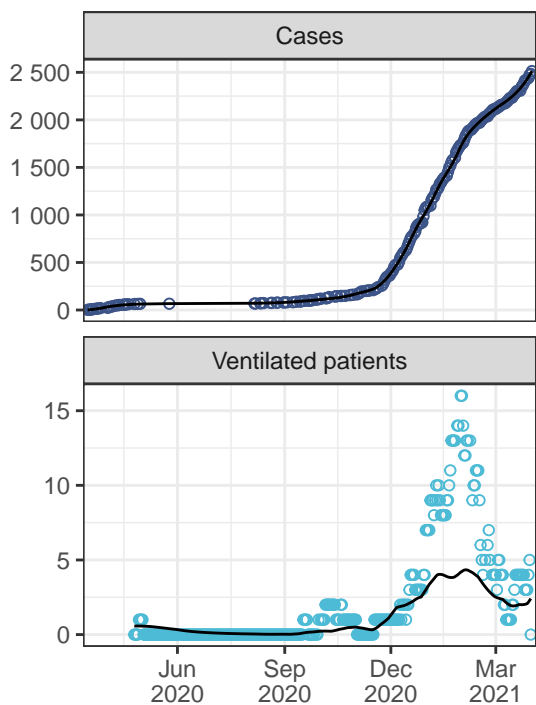

## SK Dortmund

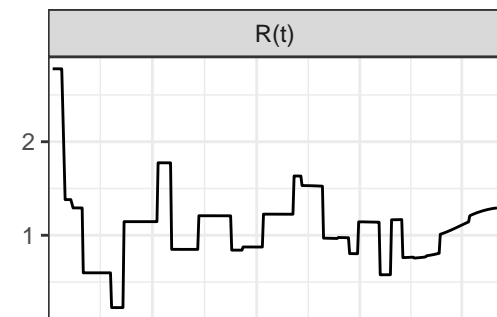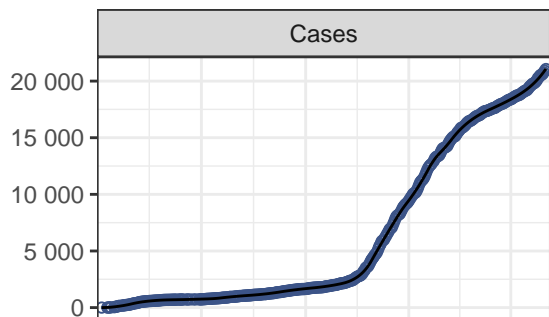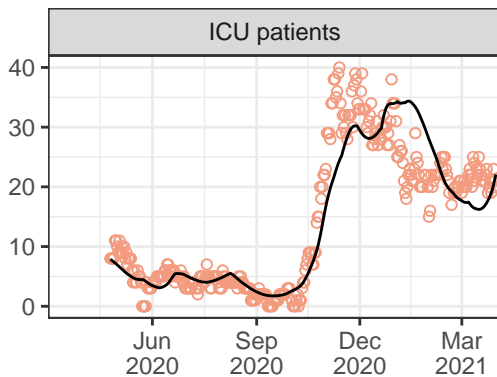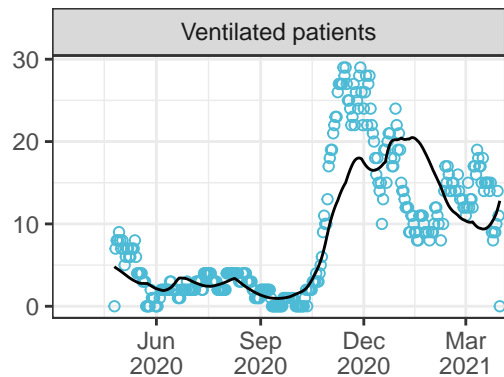

## SK Dresden

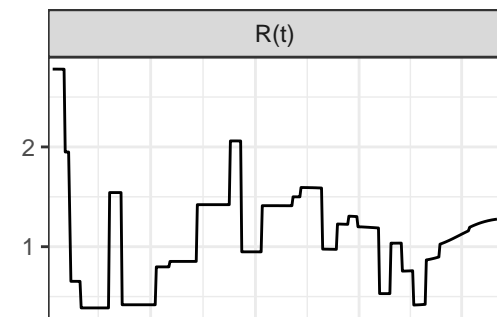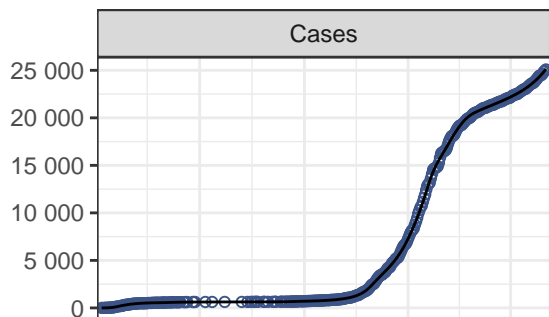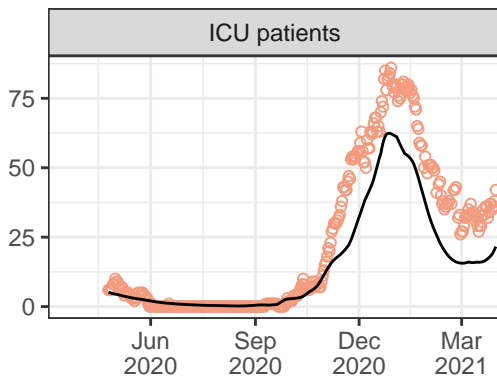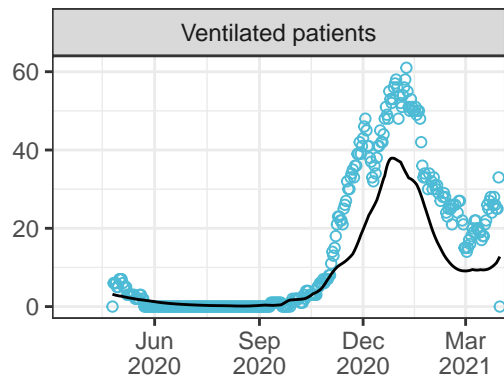

SK Duisburg

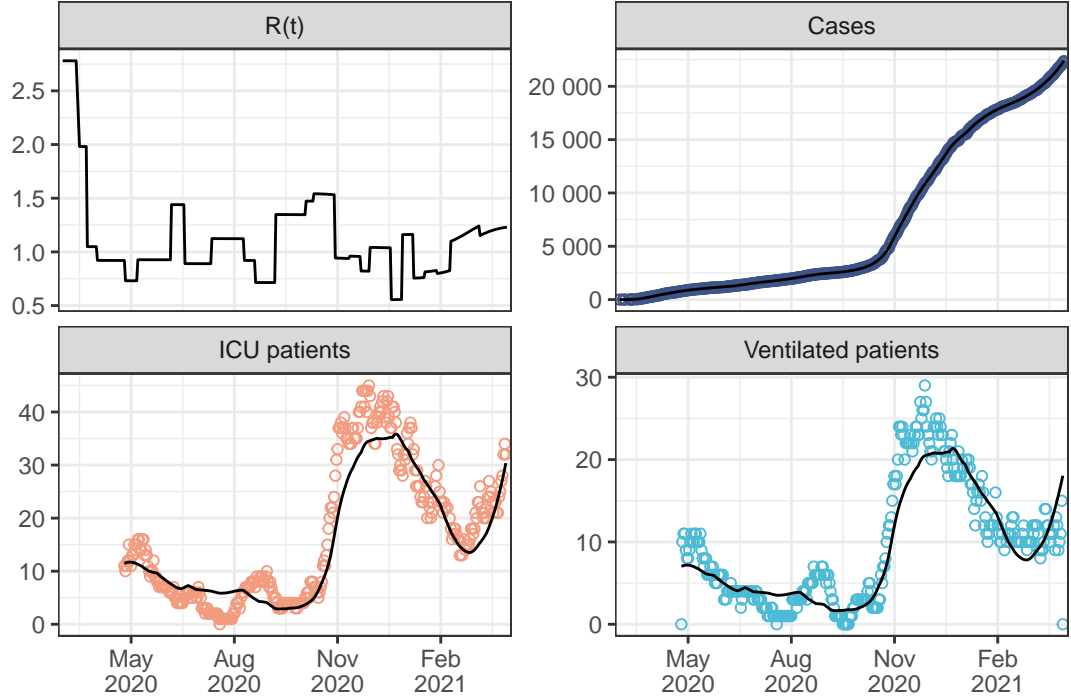

SK Düsseldorf

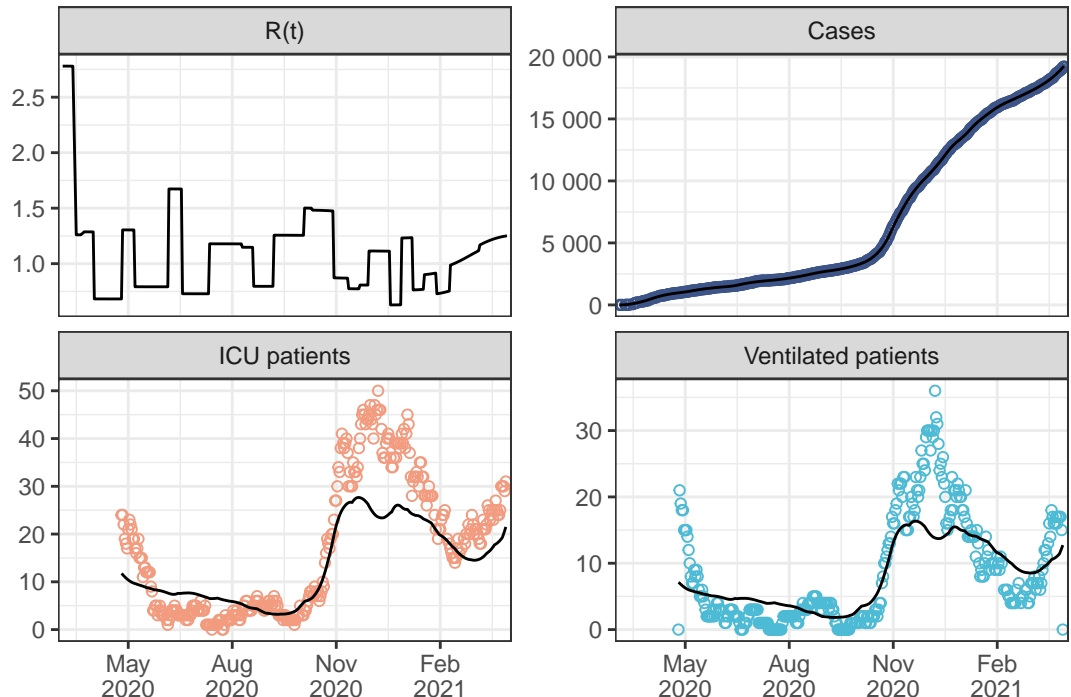

## SK Eisenach

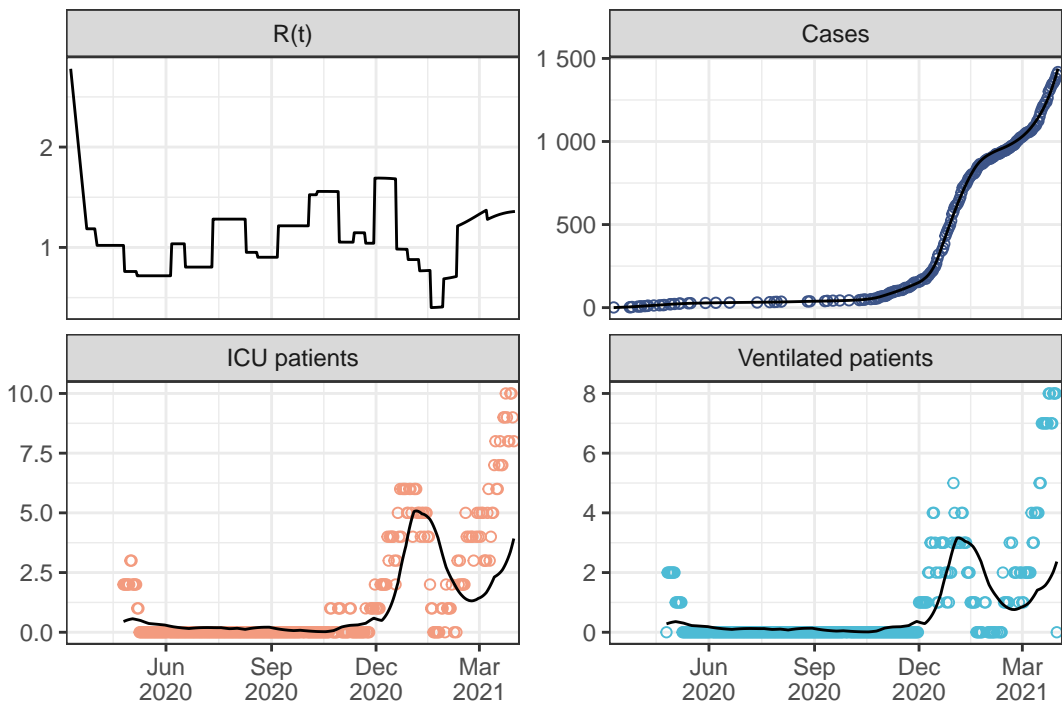

## SK Emden

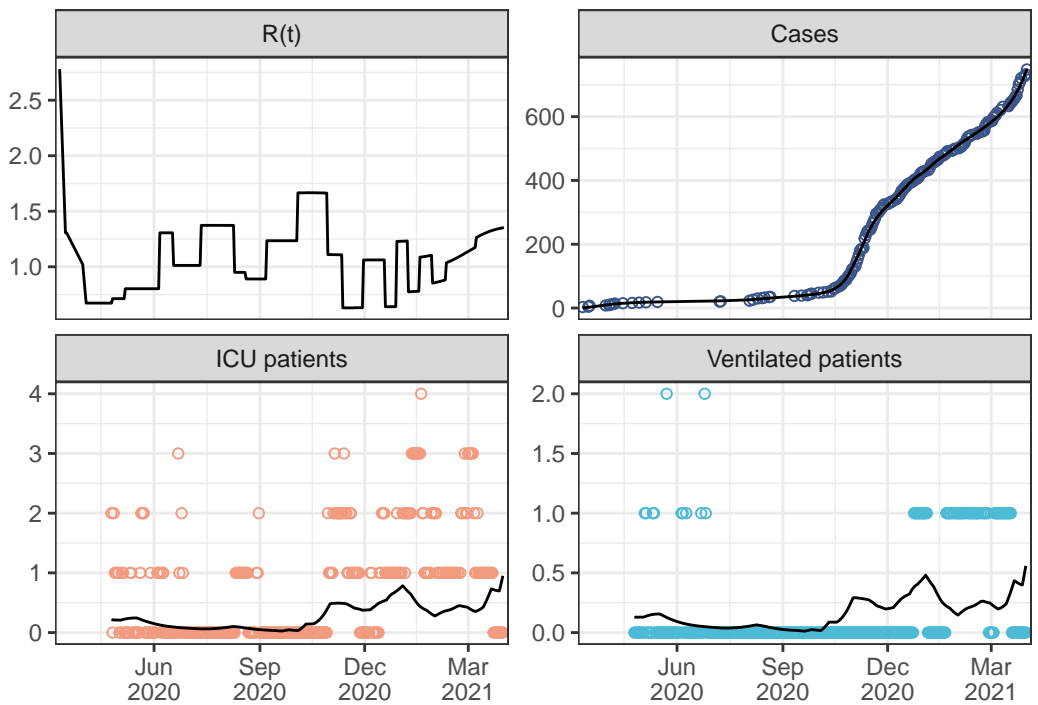

## SK Erfurt

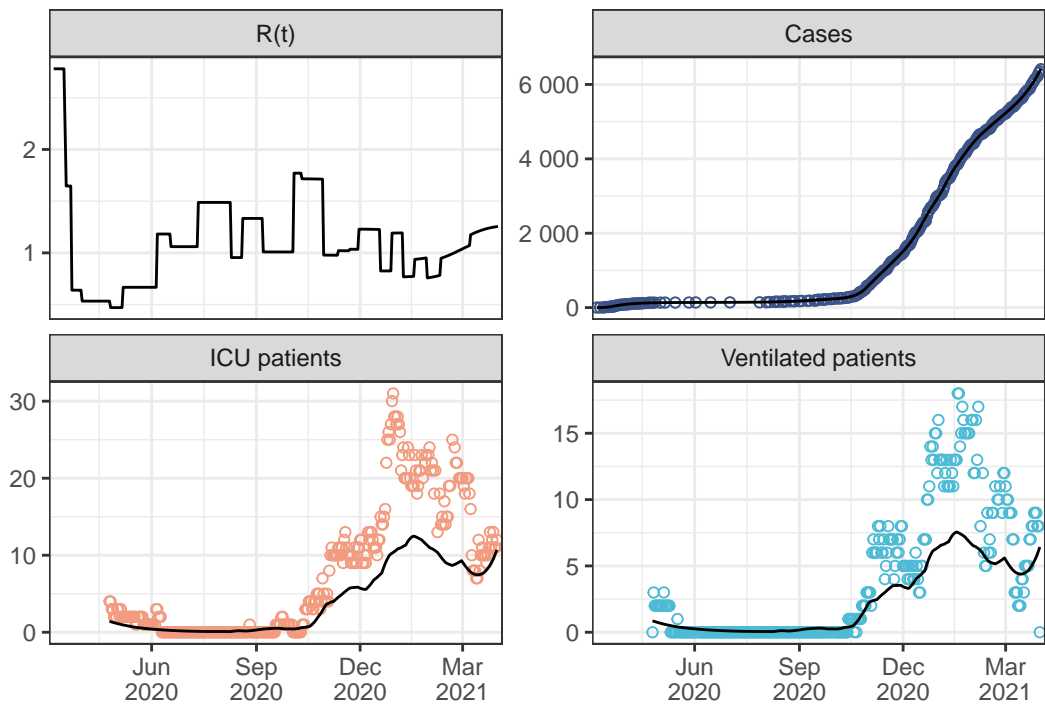

## SK Erlangen

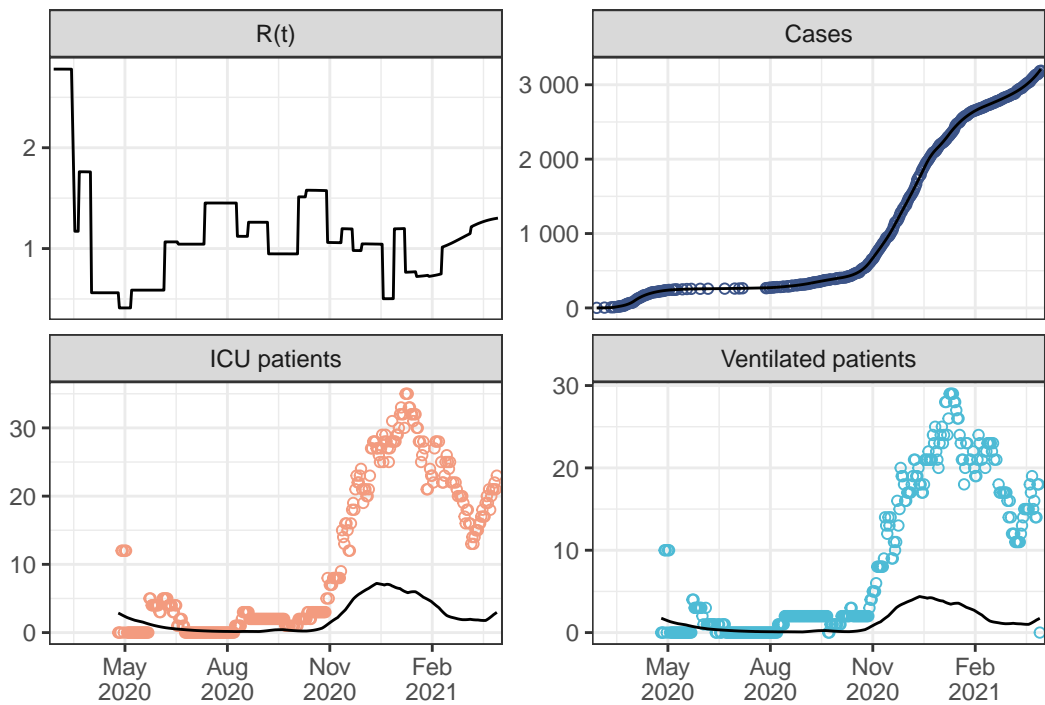

## SK Essen

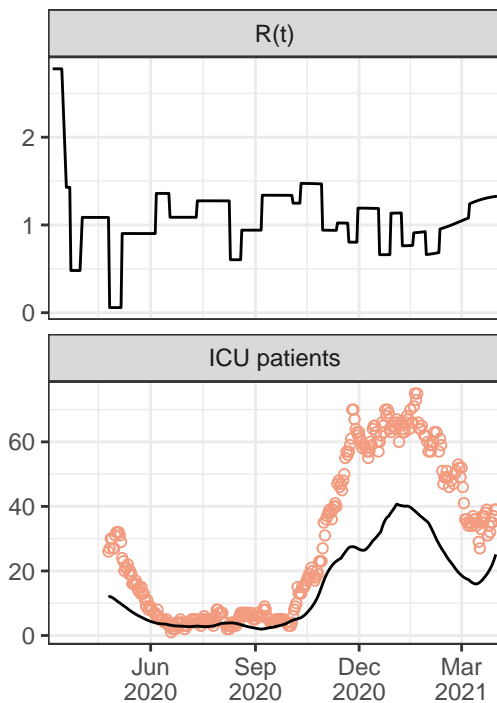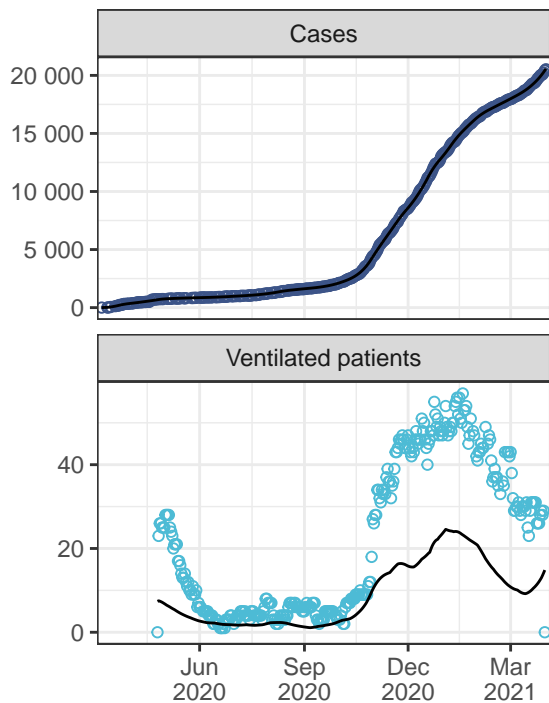

## SK Flensburg

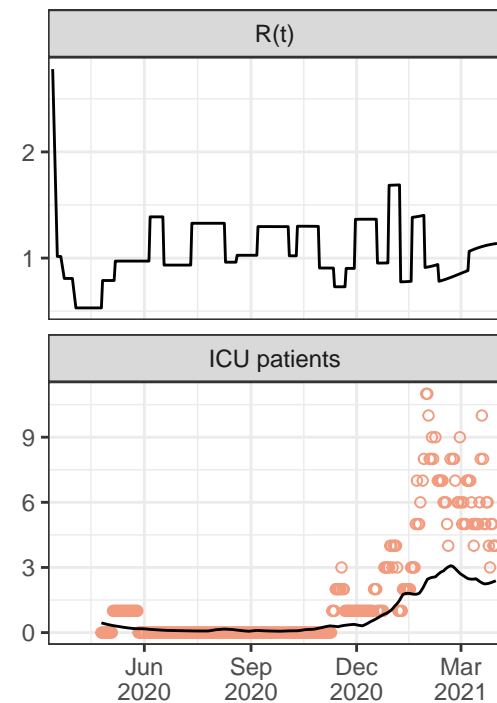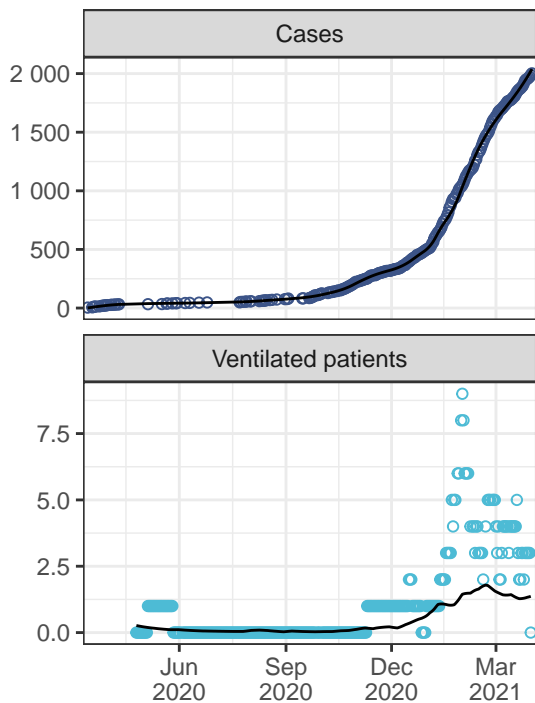

## SK Frankenthal

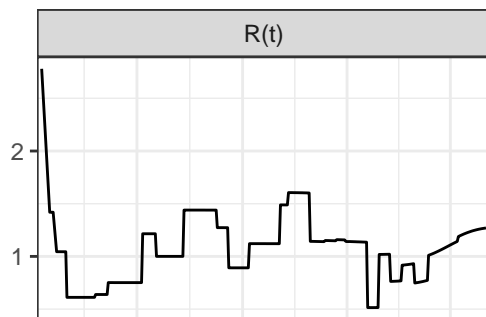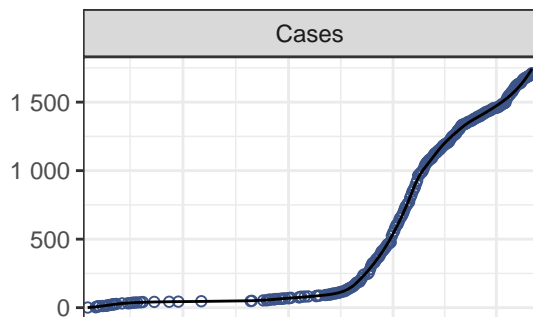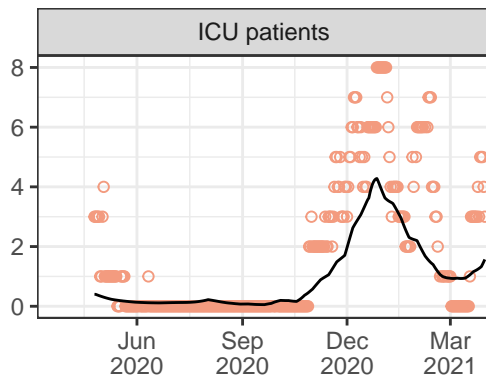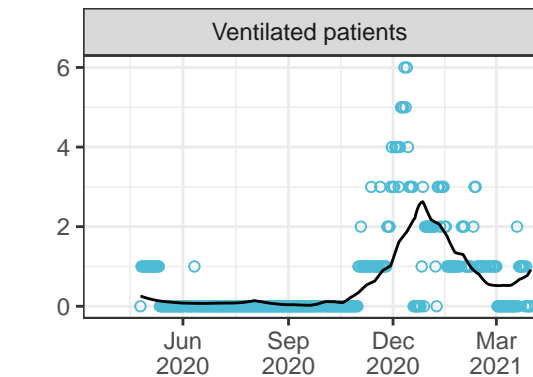

## SK Frankfurt (Oder)

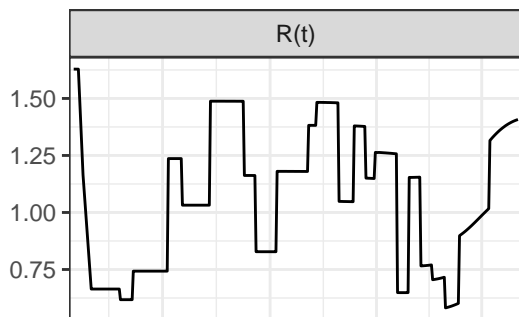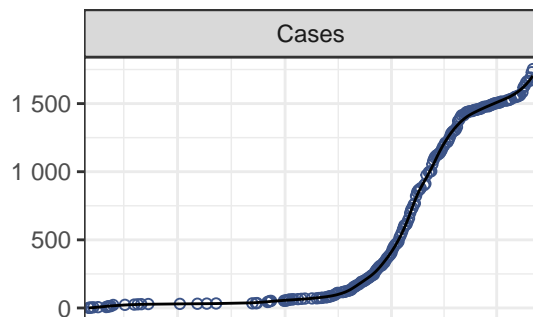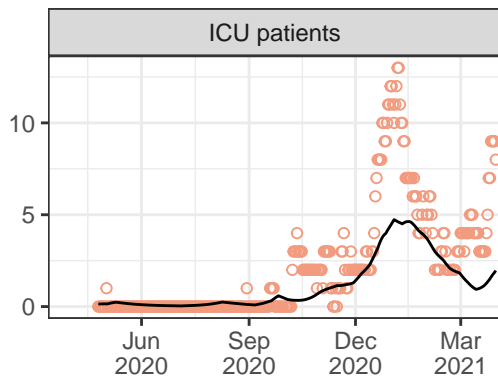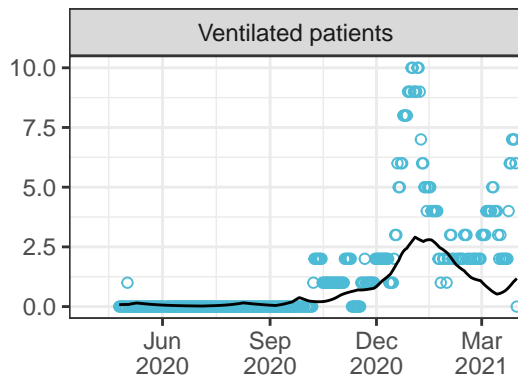

## SK Frankfurt am Main

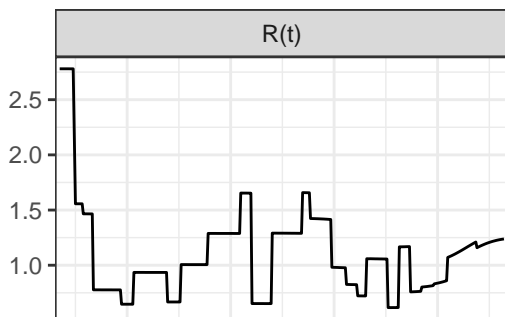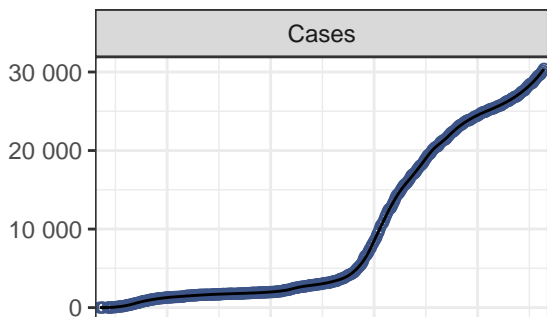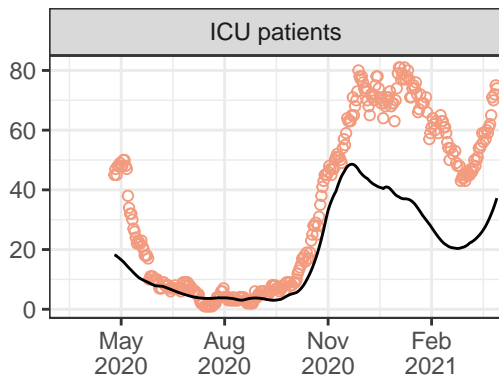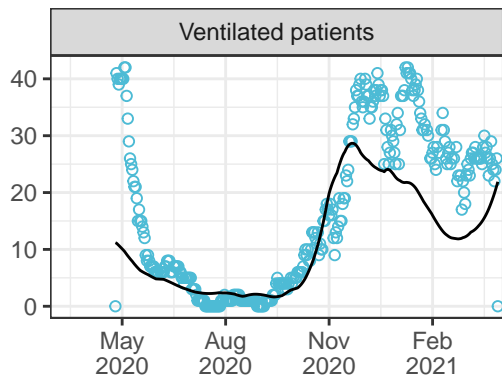

## SK Freiburg i.Breisgau

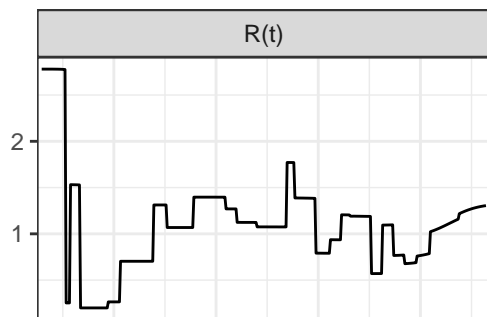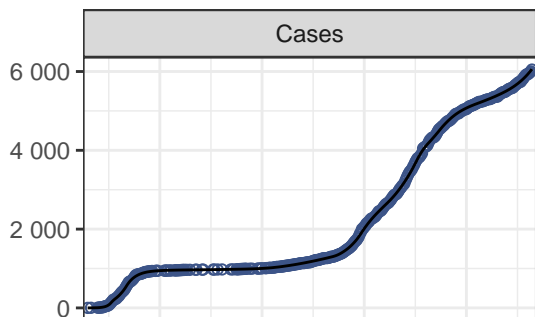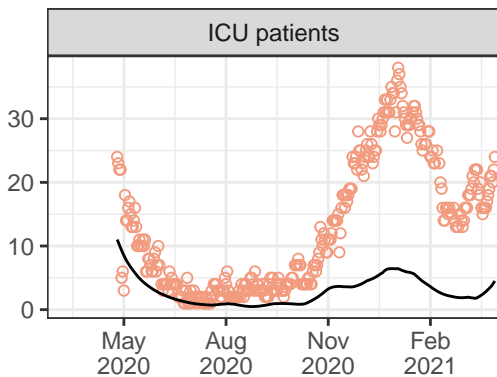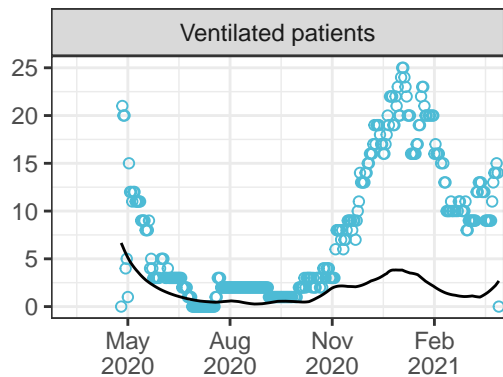

## SK Fürth

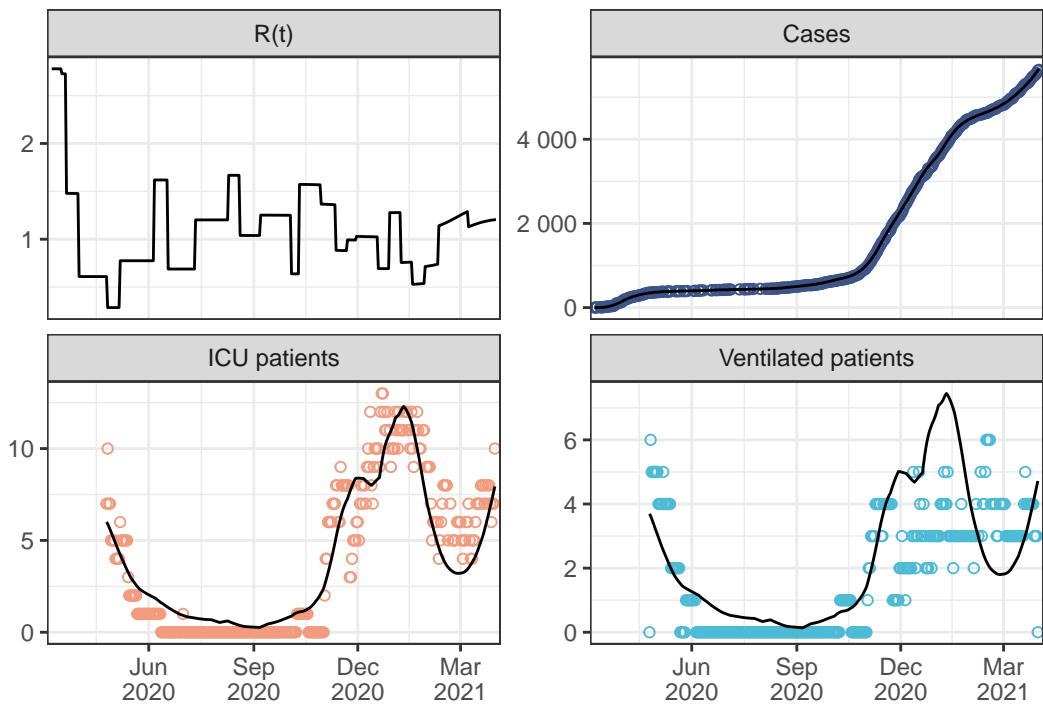

## SK Gelsenkirchen

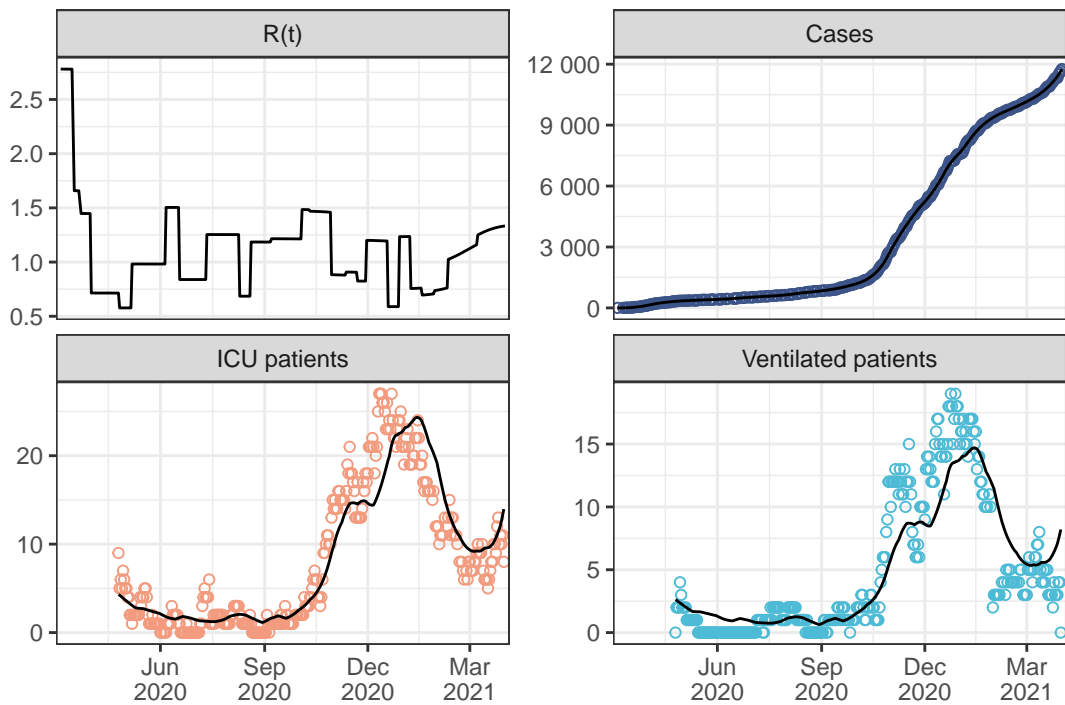

## SK Gera

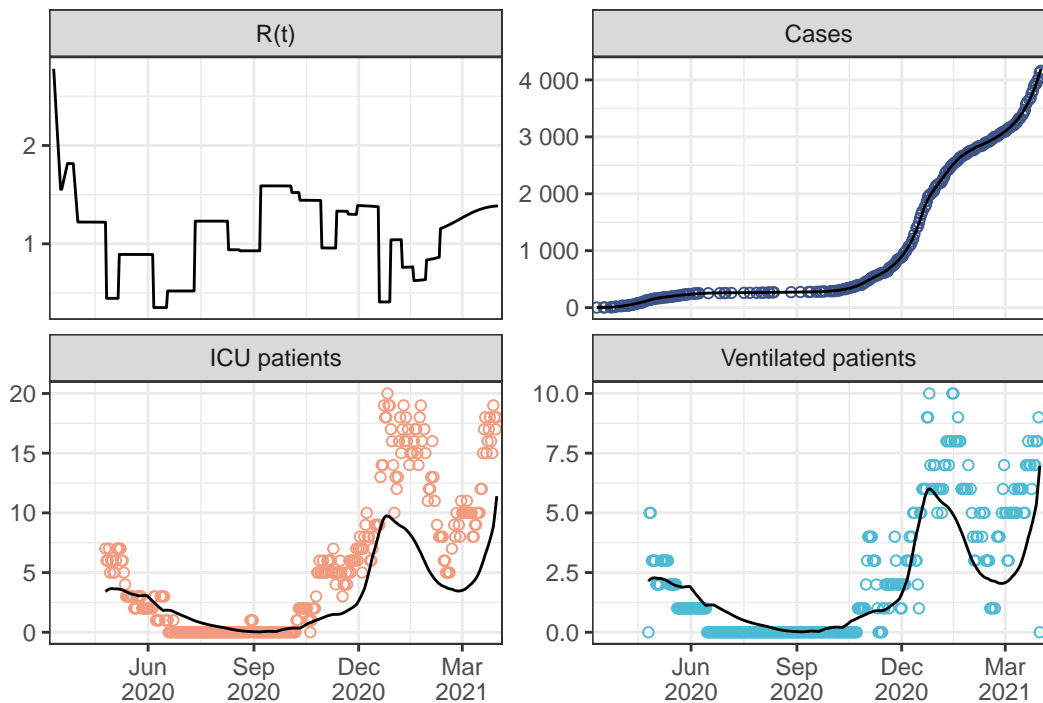

## SK Hagen

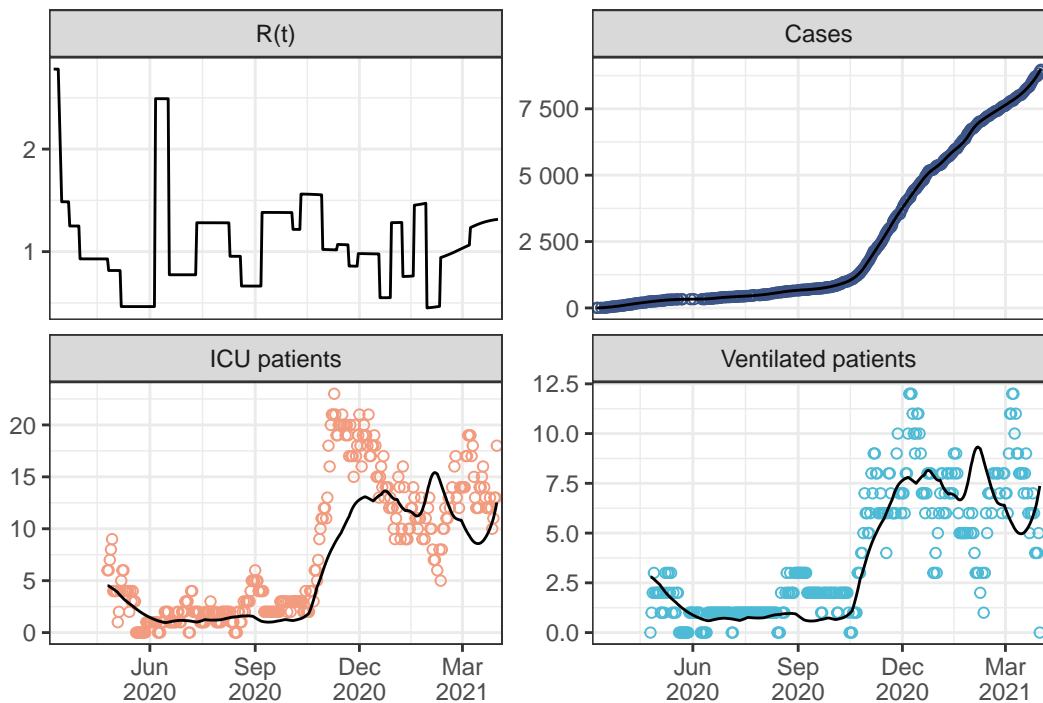

## SK Halle

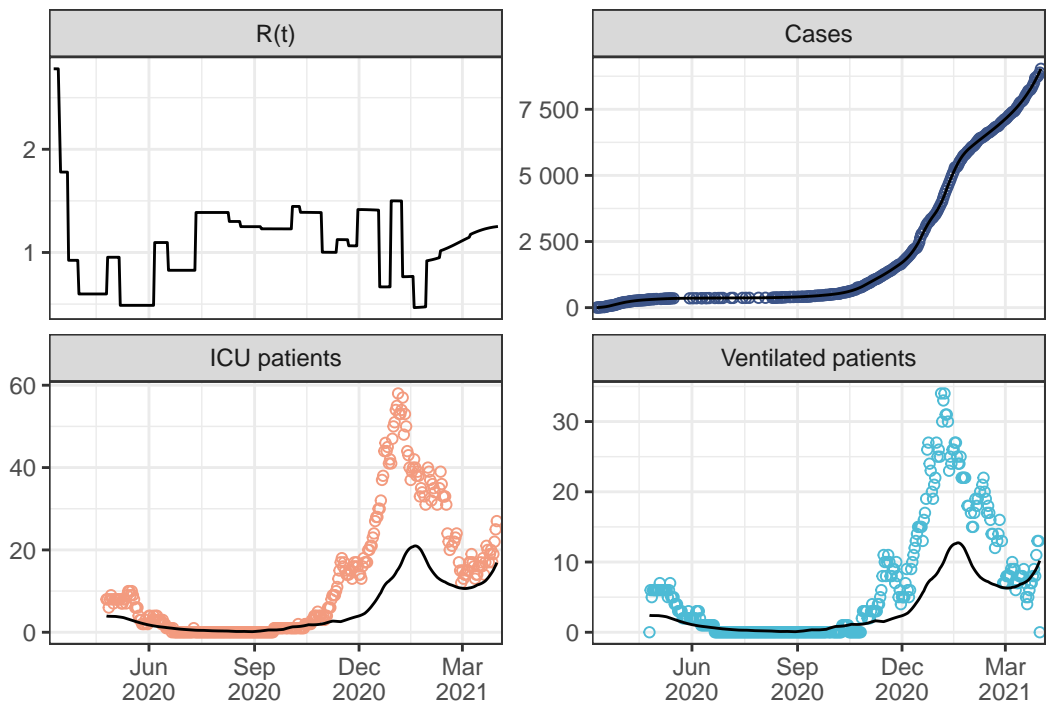

## SK Hamburg

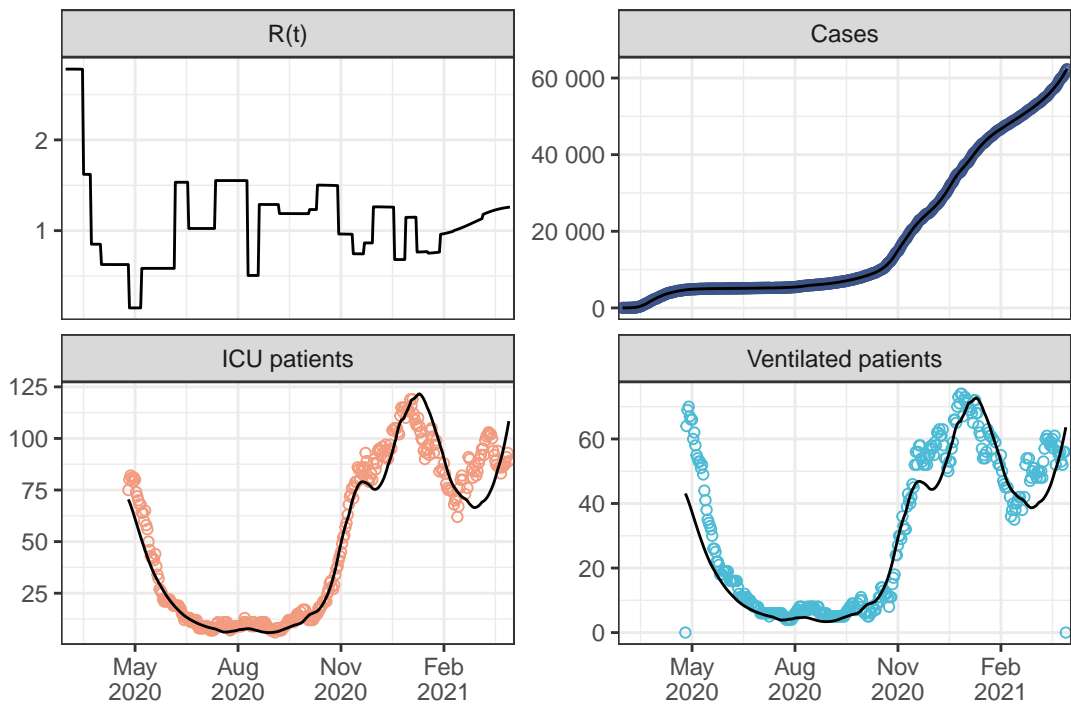

## SK Hamm

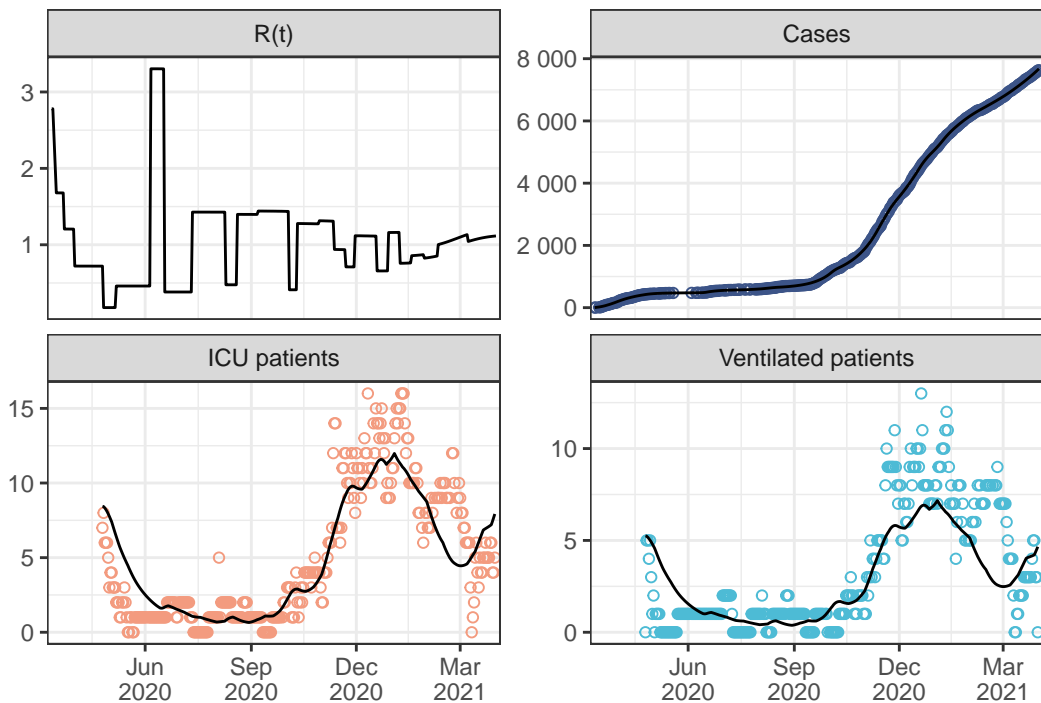

## SK Heidelberg

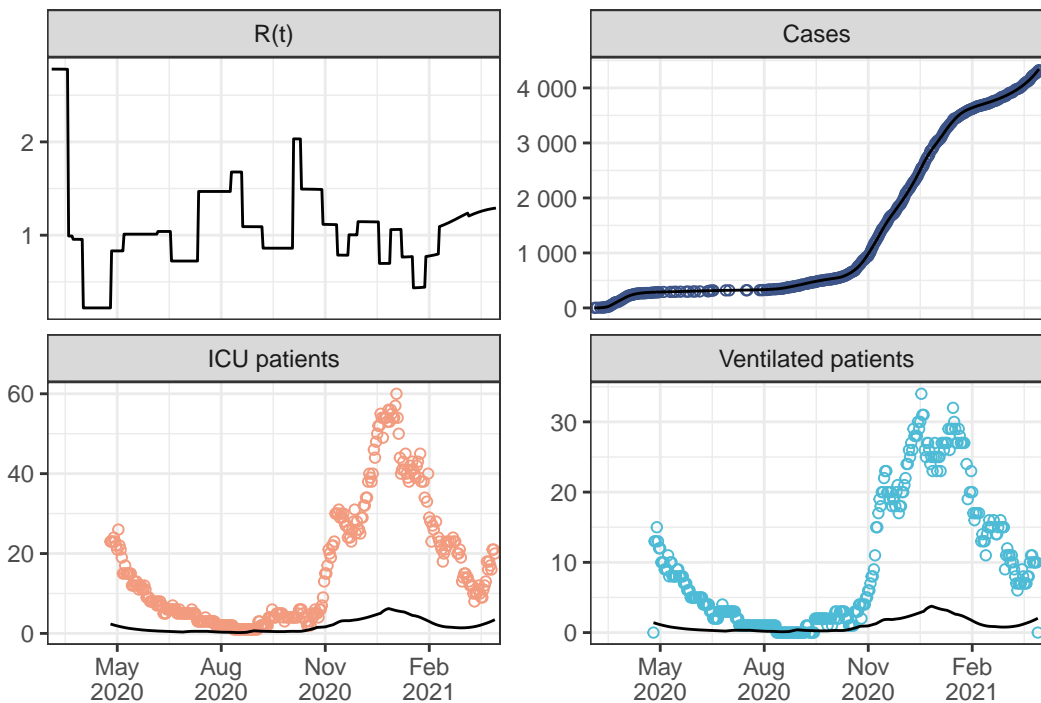

## SK Heilbronn

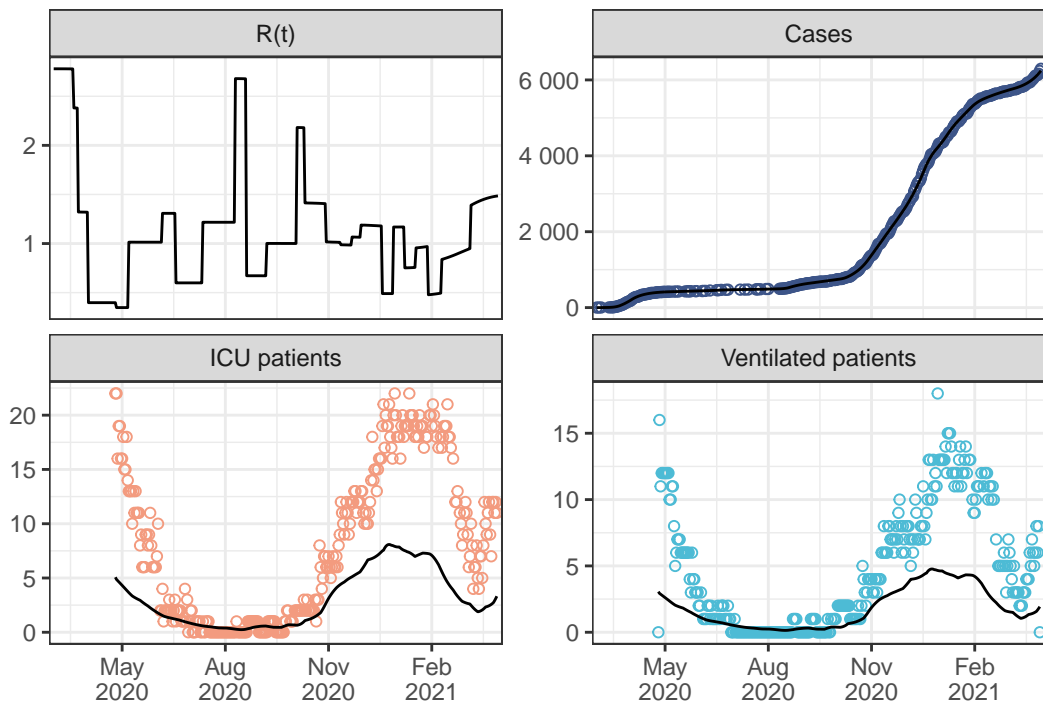

## SK Herne

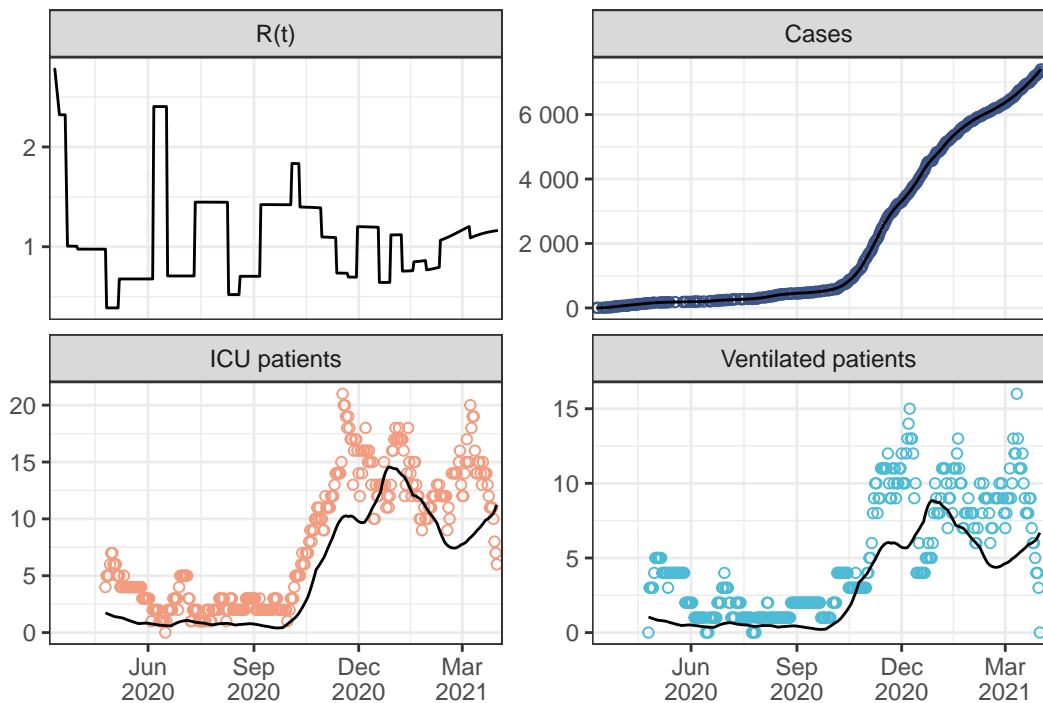

## SK Hof

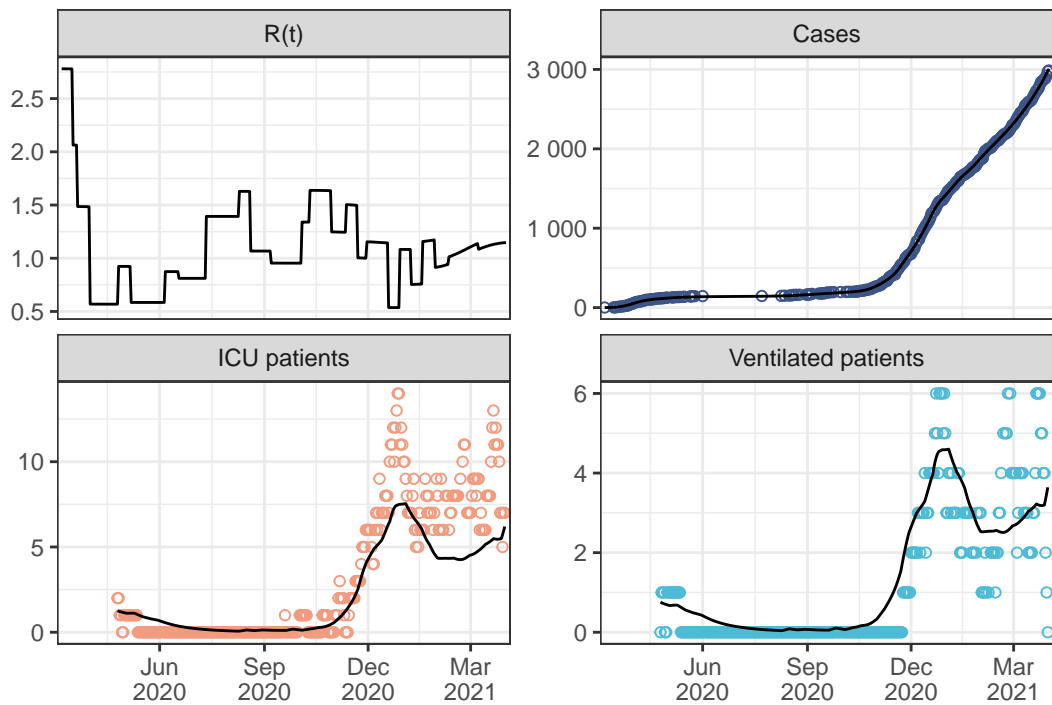

## SK Ingolstadt

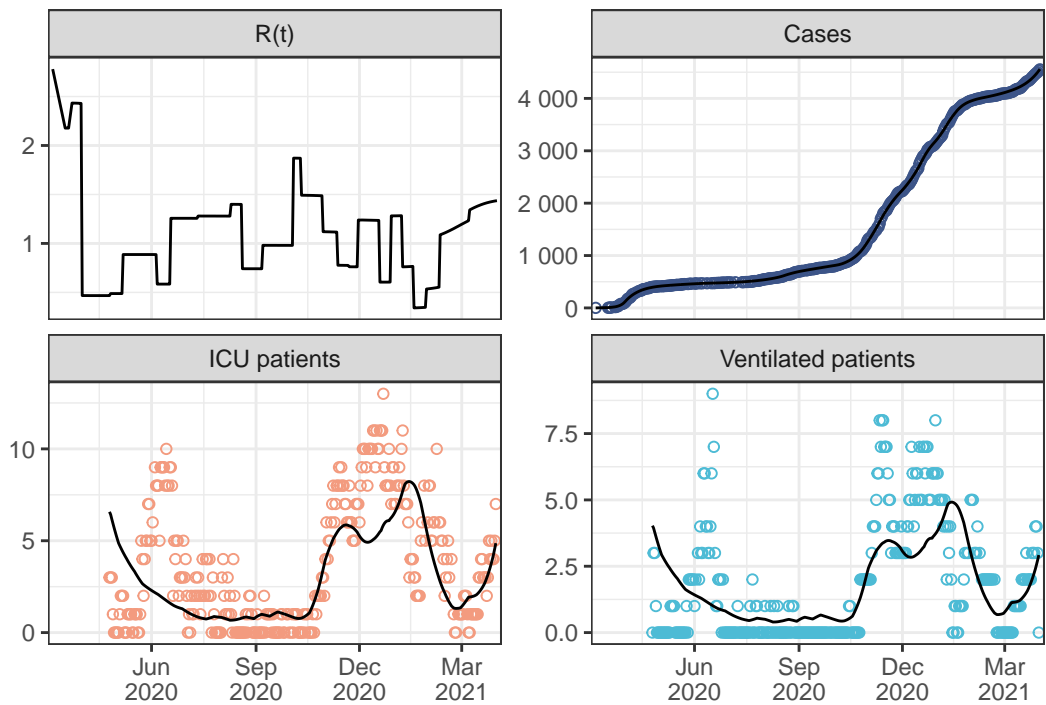

## SK Jena

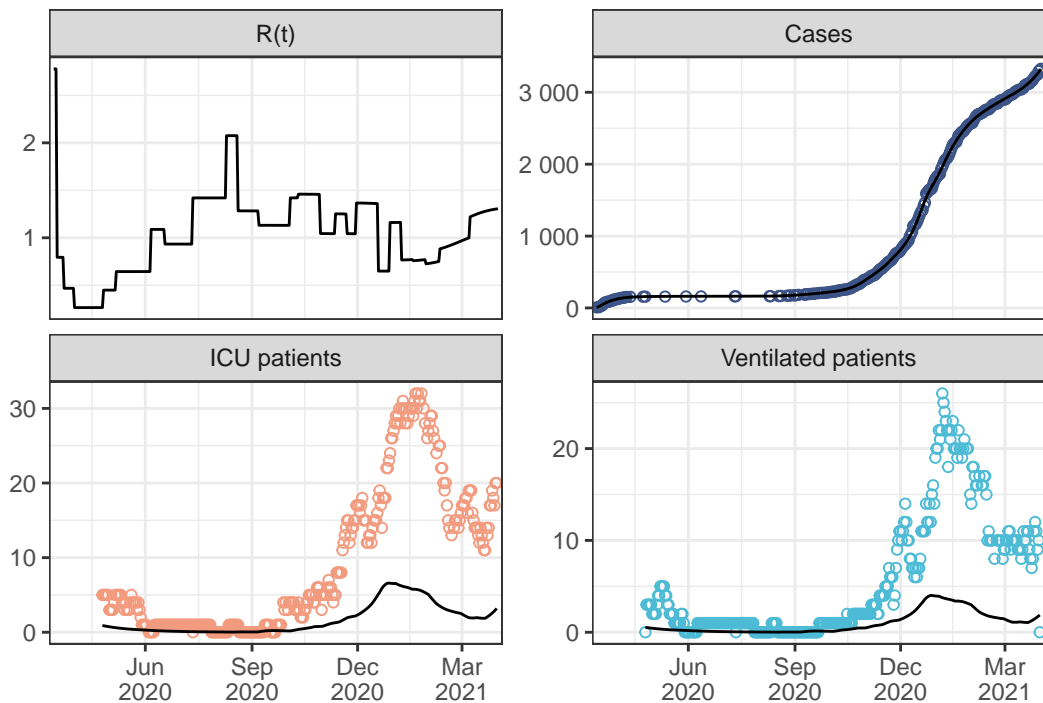

## SK Kaiserslautern

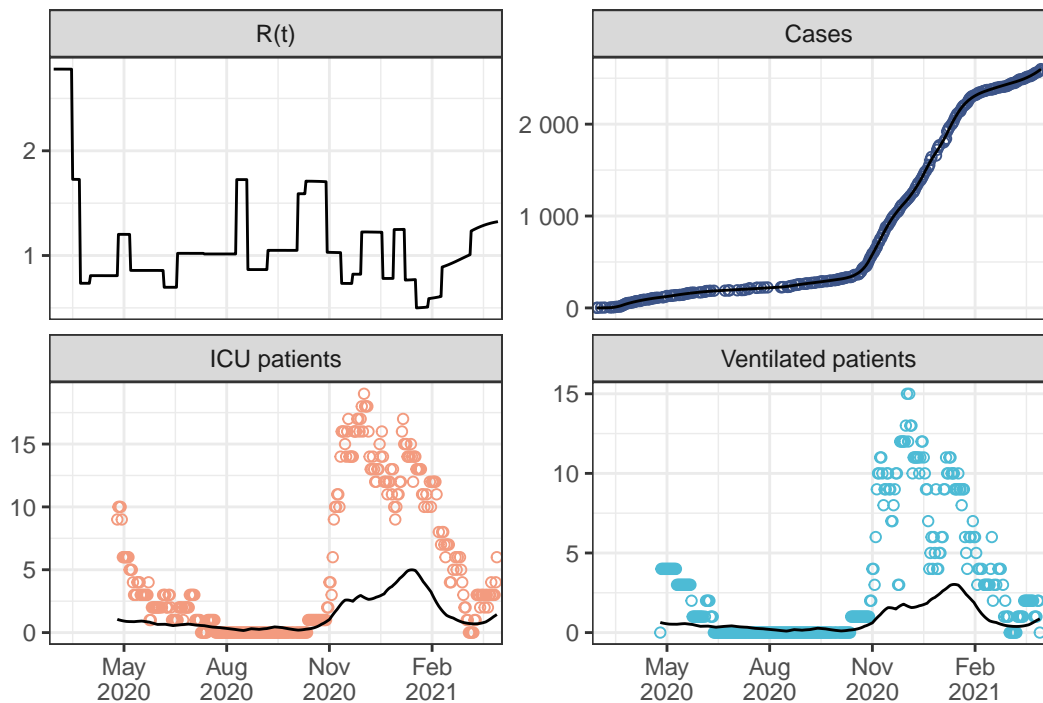

## SK Karlsruhe

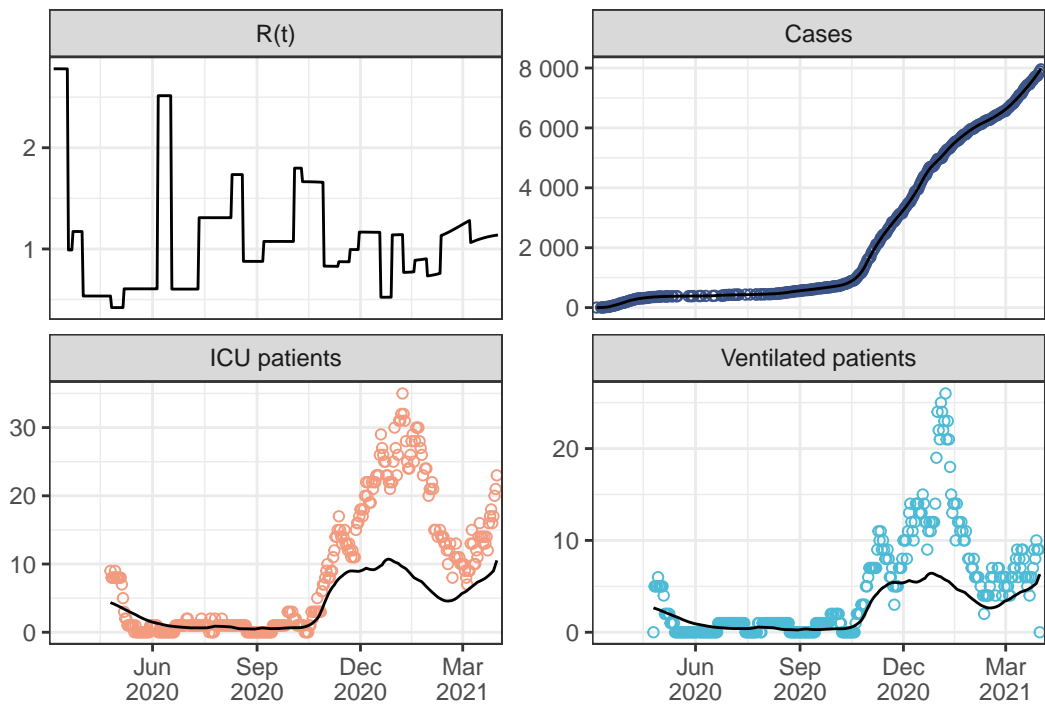

## SK Kassel

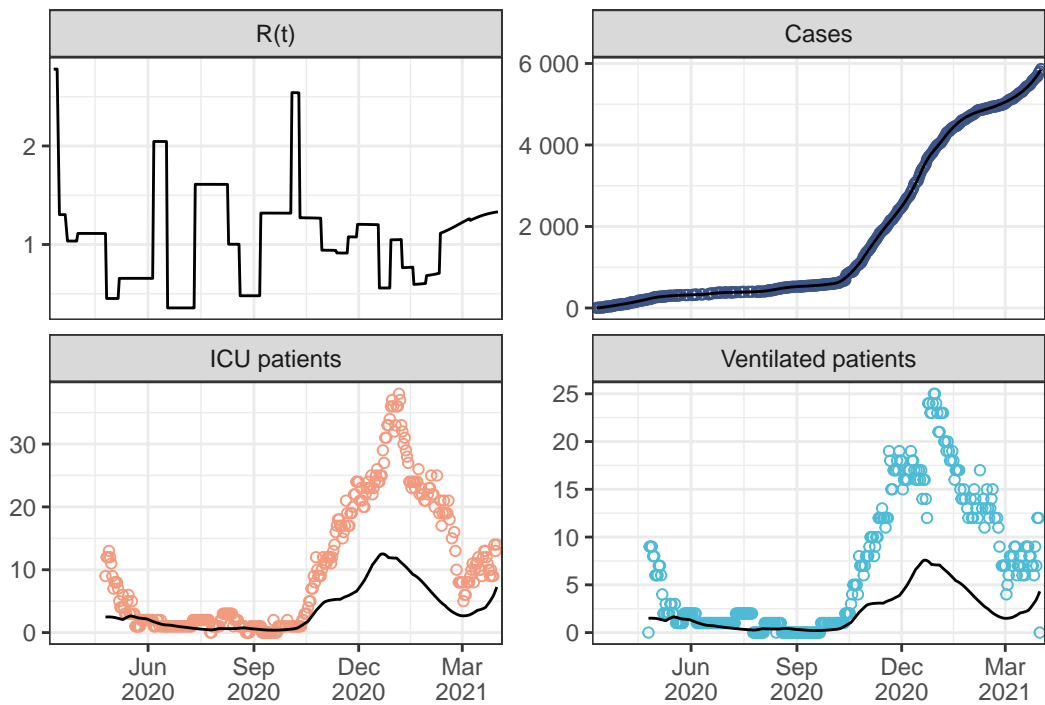

## SK Kaufbeuren

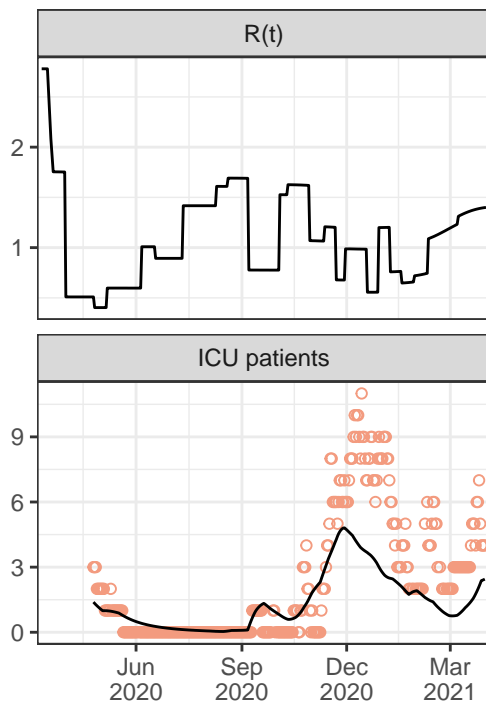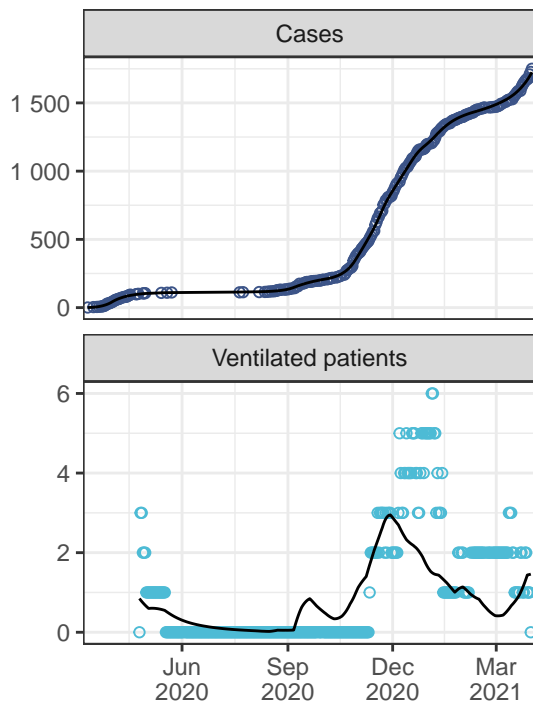

## SK Kempten

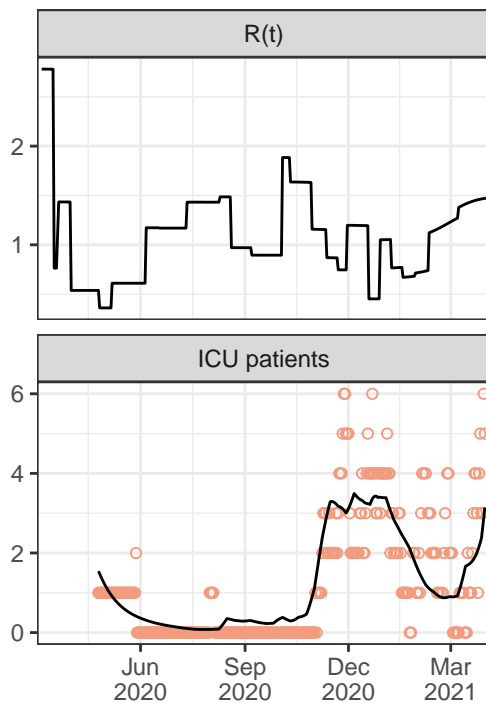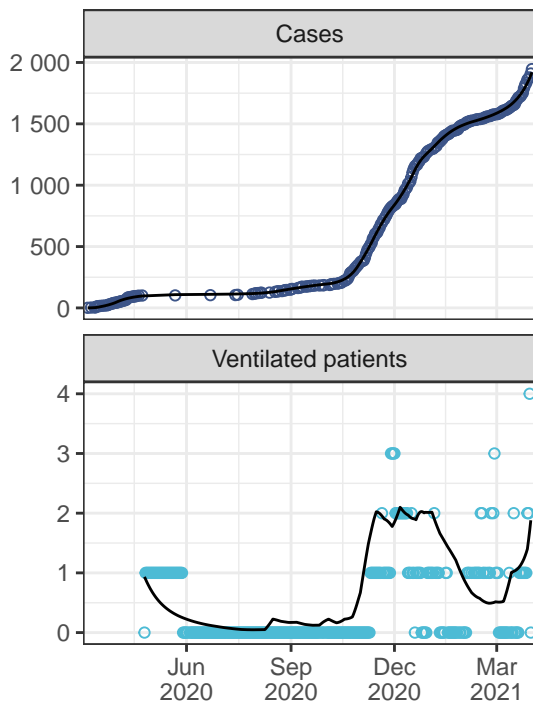

## SK Kiel

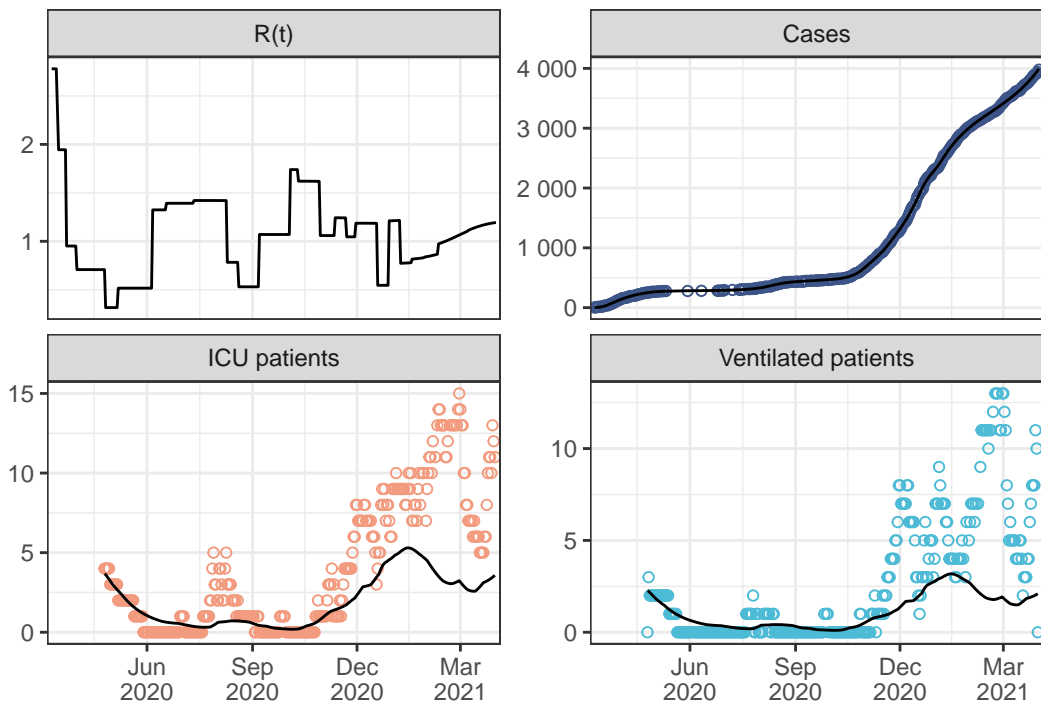

## SK Koblenz

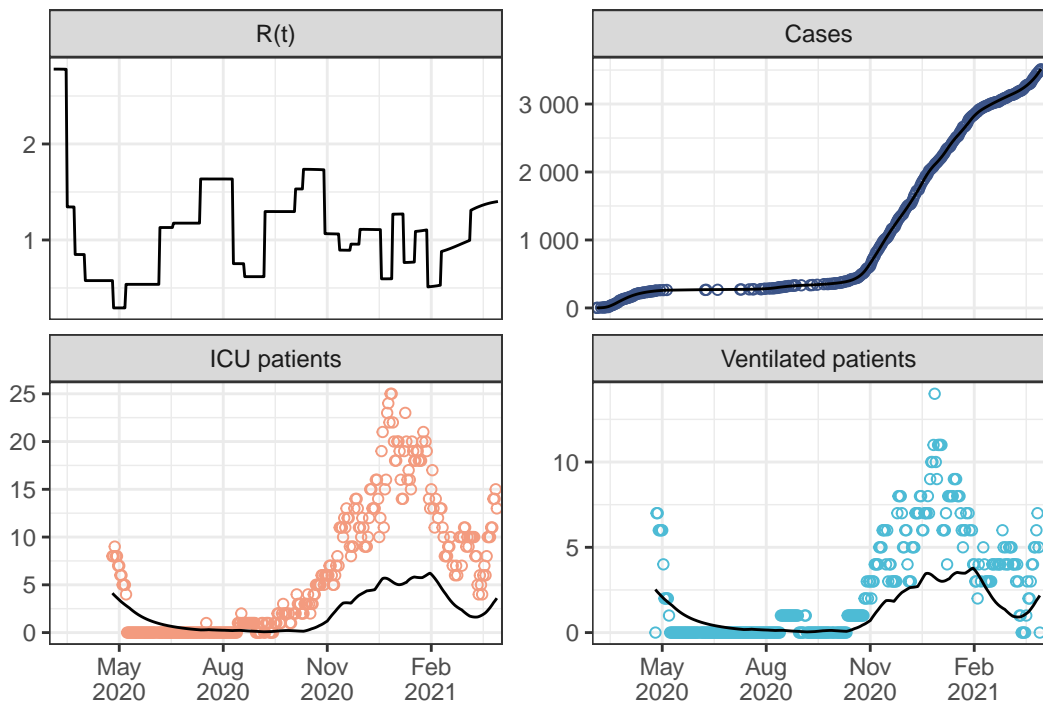

## SK Köln

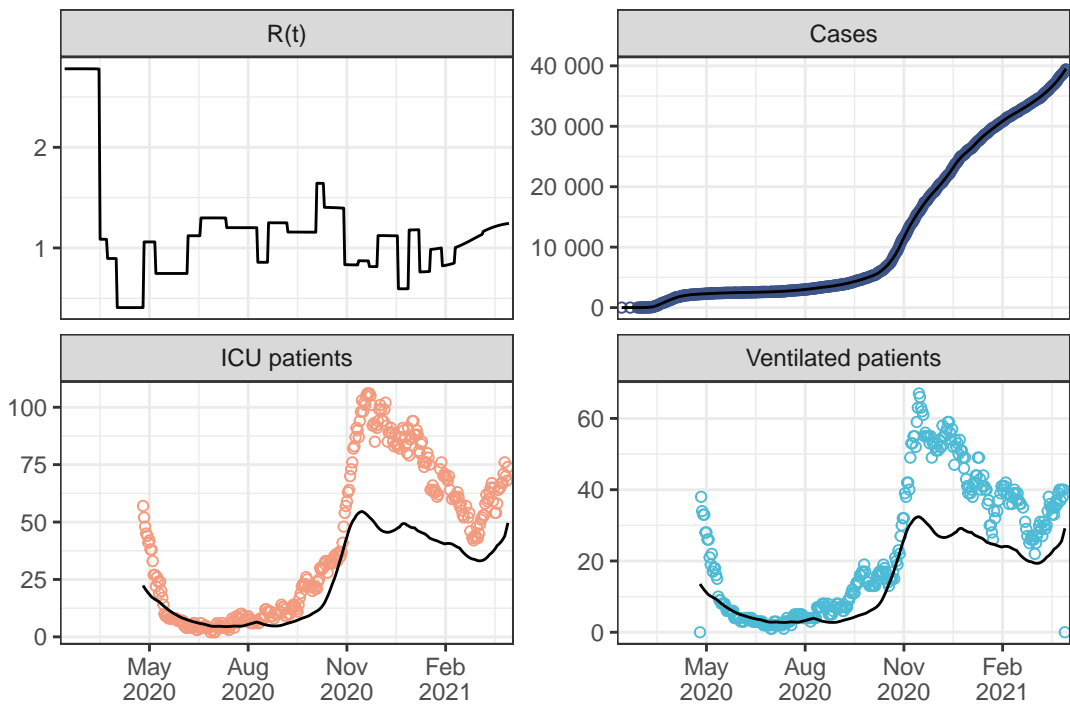

## SK Krefeld

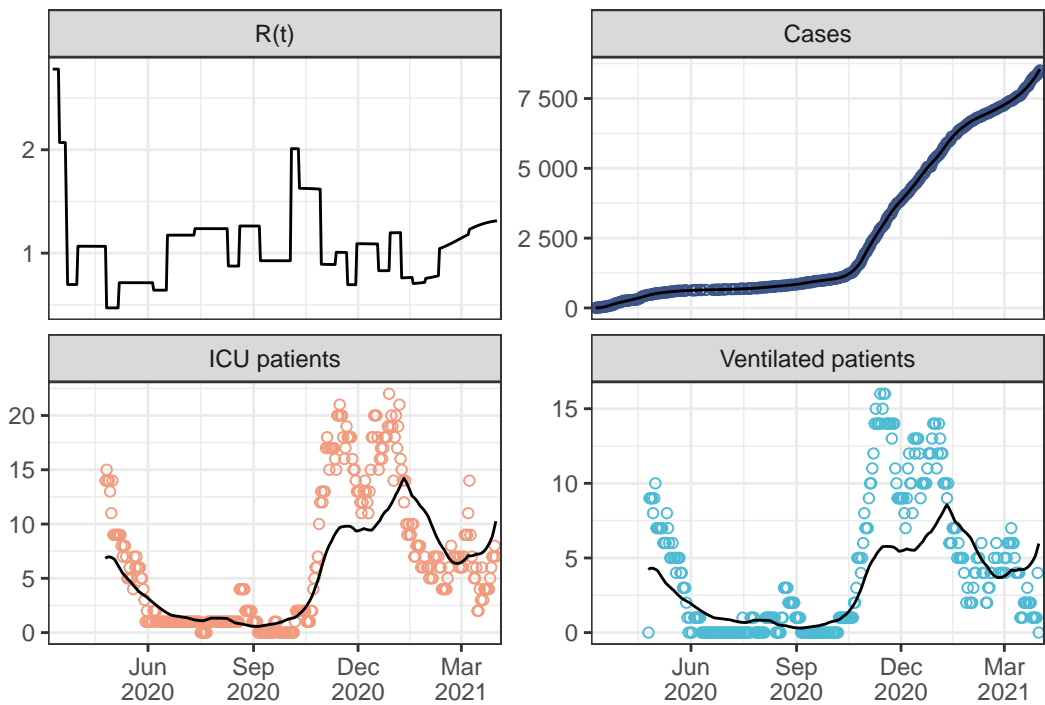

## SK Landau i.d.Pfalz

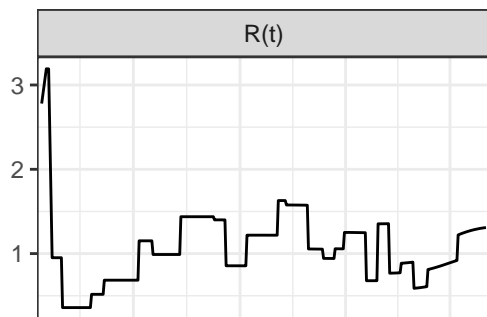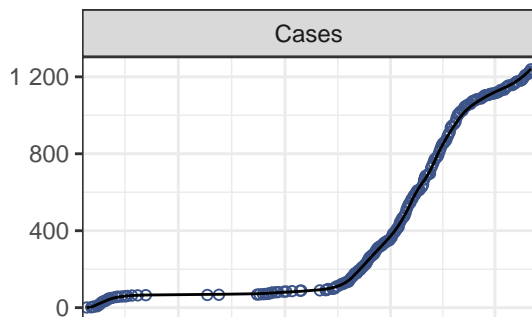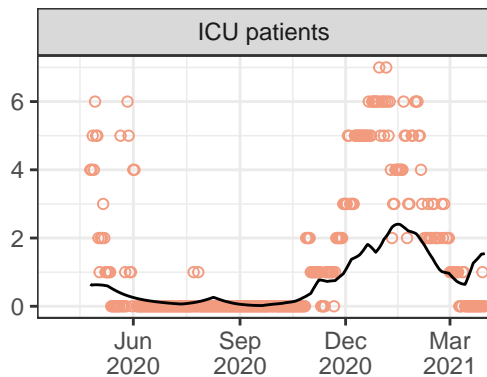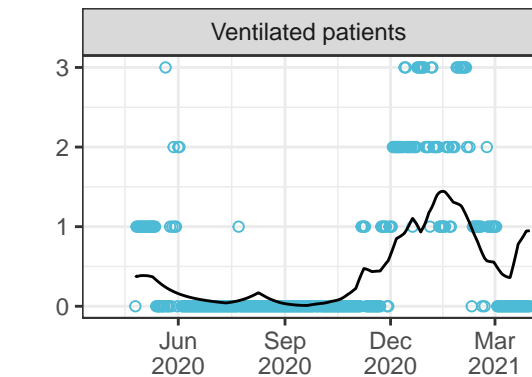

## SK Landshut

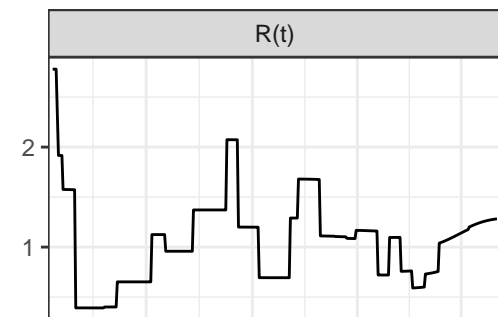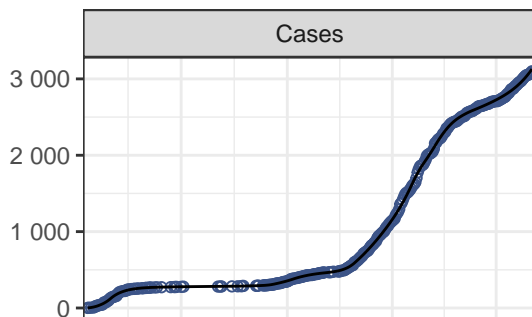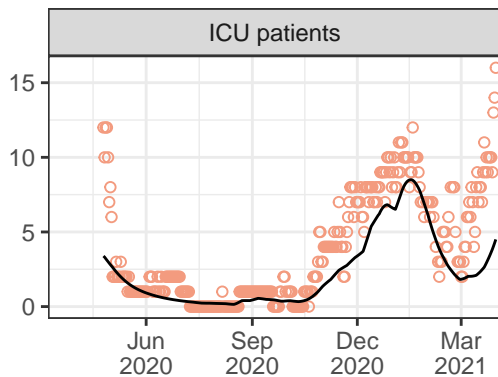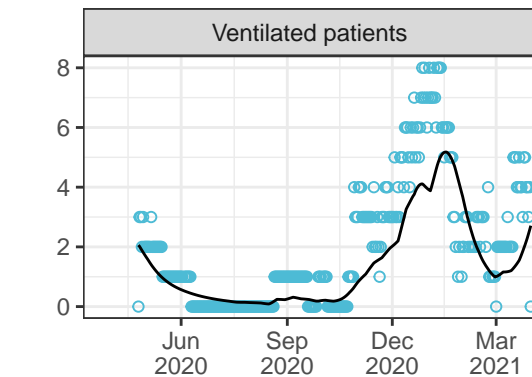

## SK Leipzig

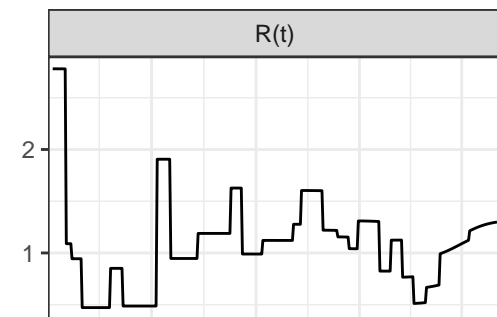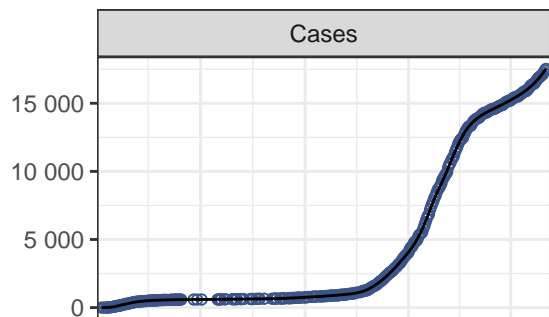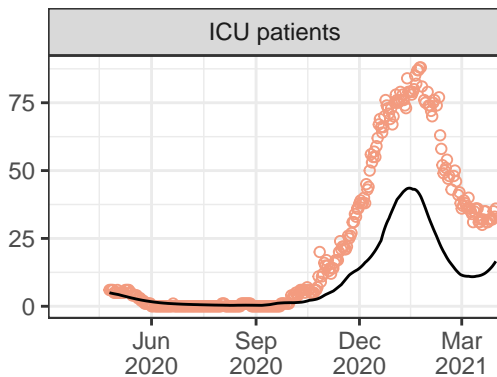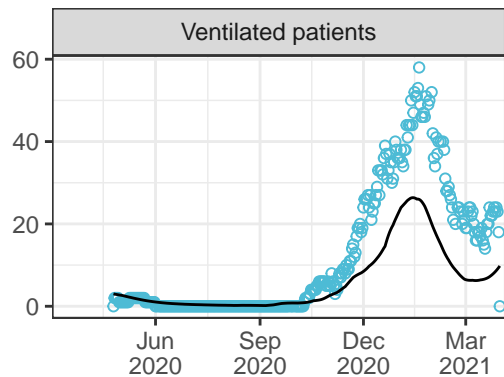

## SK Leverkusen

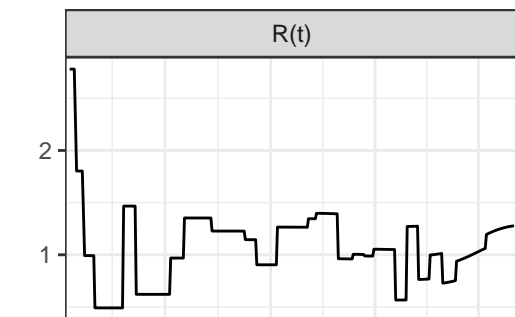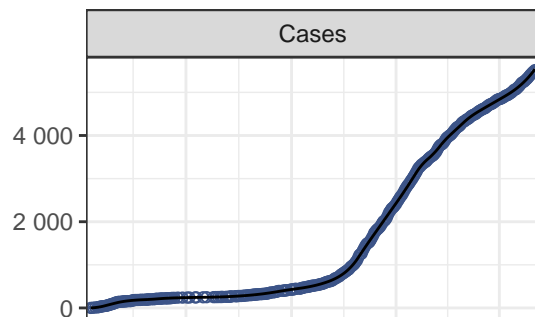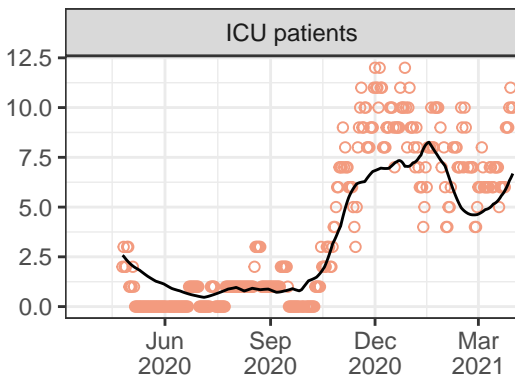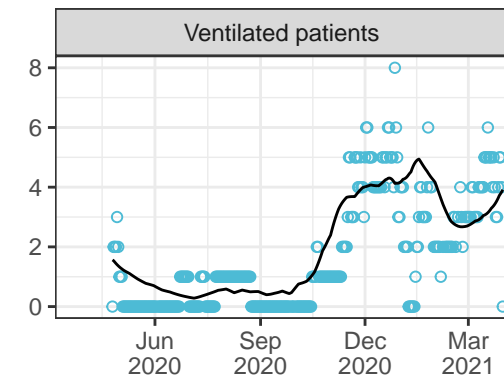

## SK Lübeck

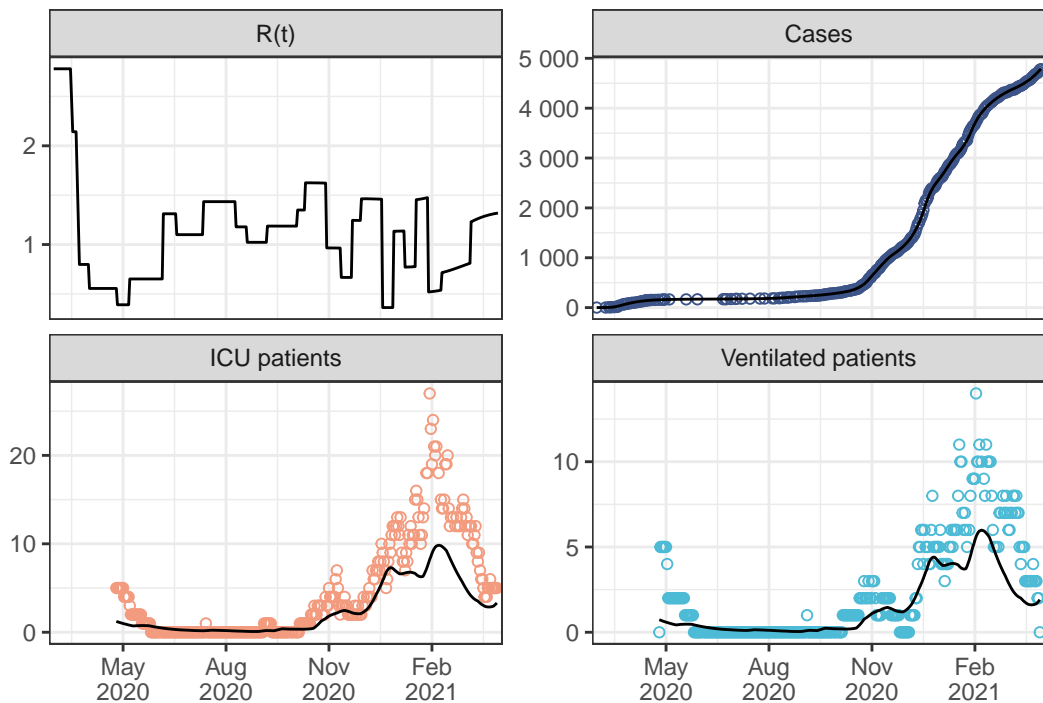

## SK Ludwigshafen

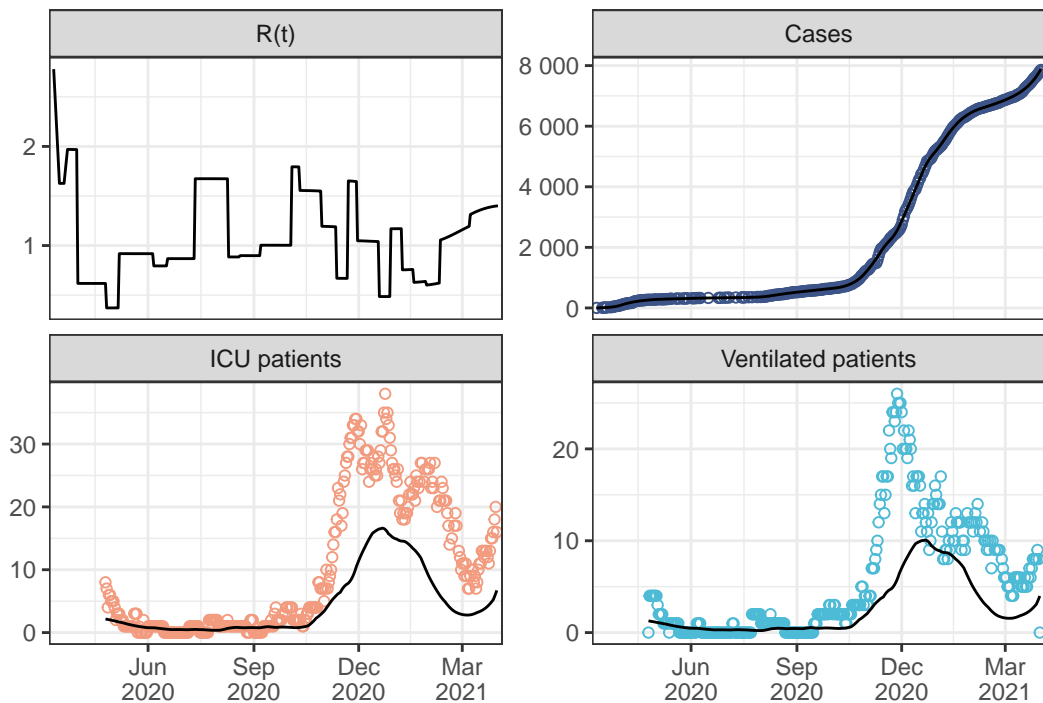

## SK Magdeburg

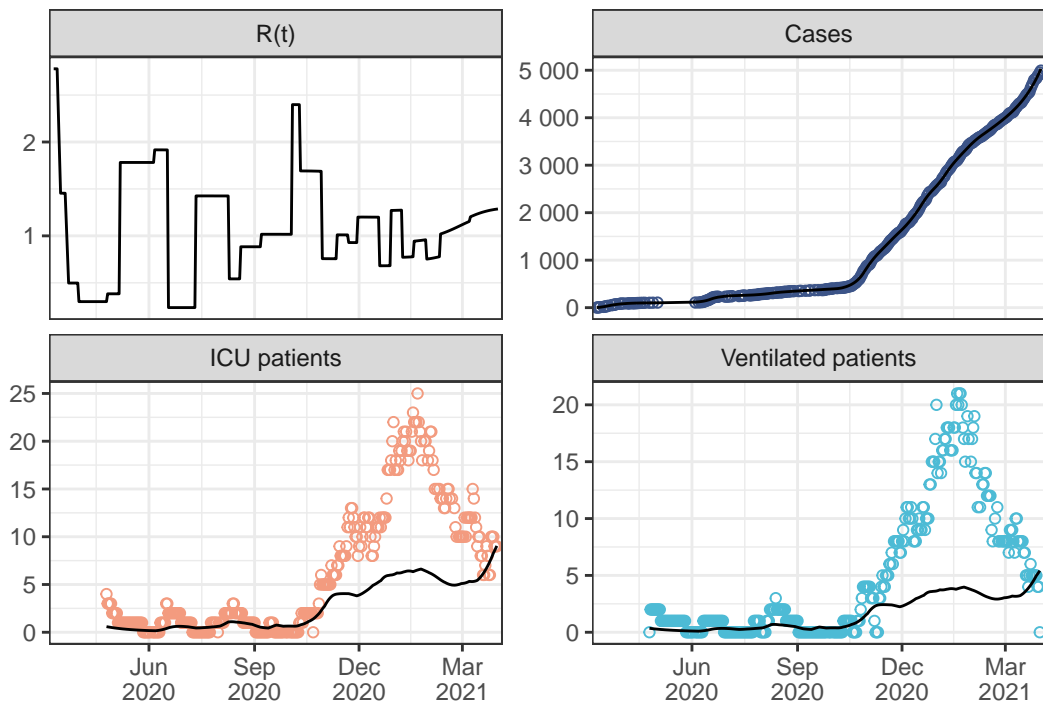

## SK Mainz

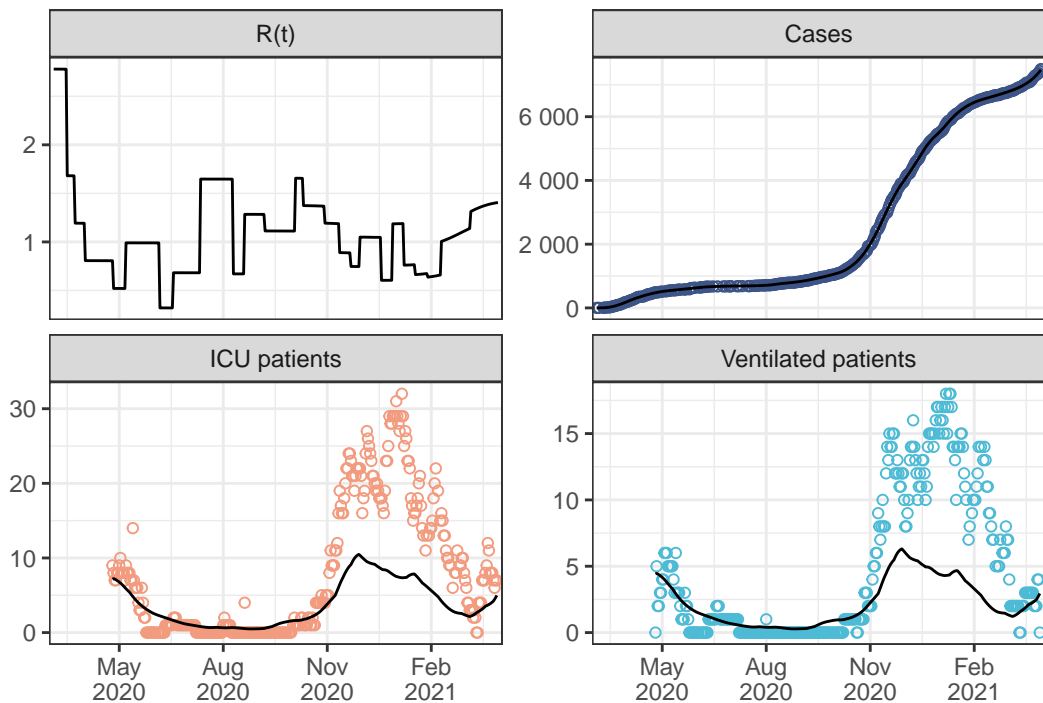

## SK Mannheim

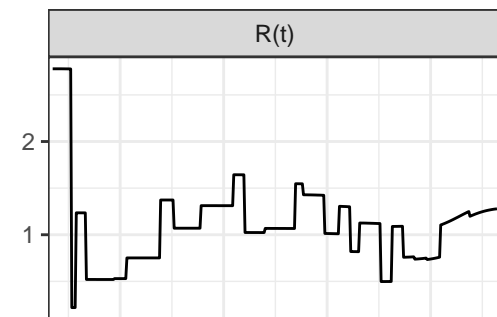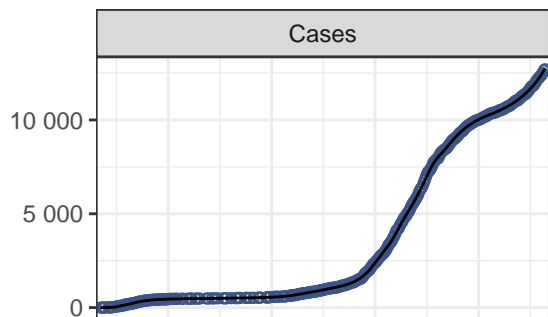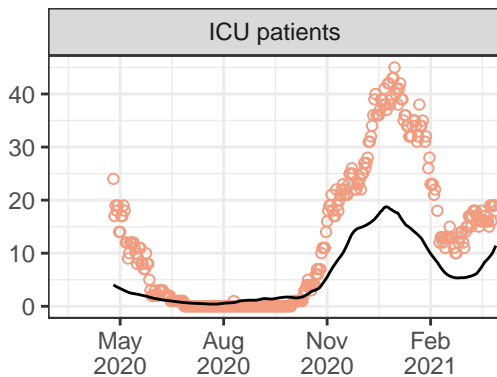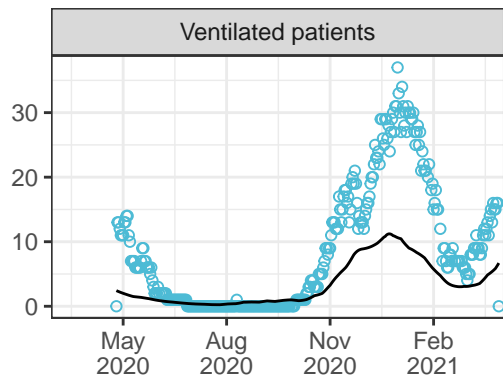

## SK Memmingen

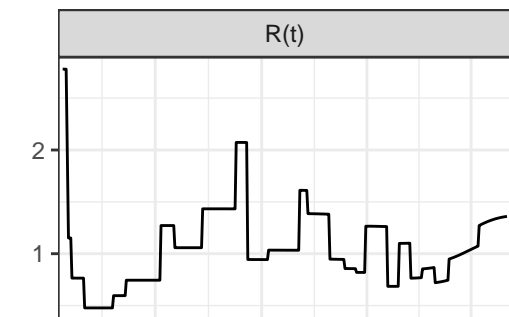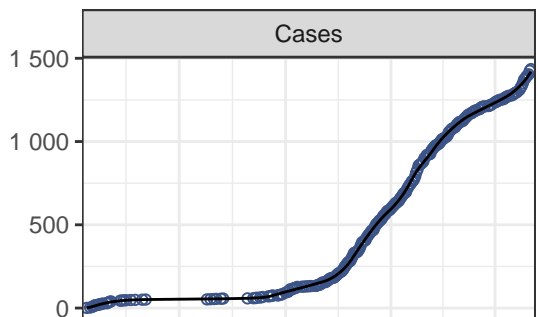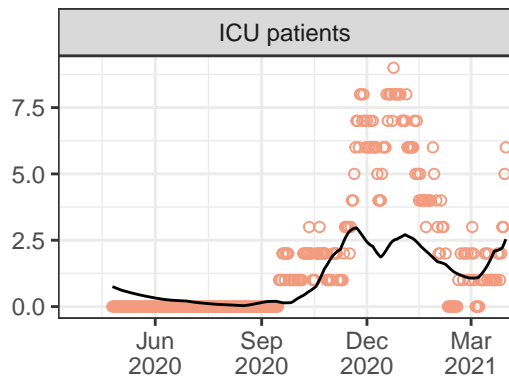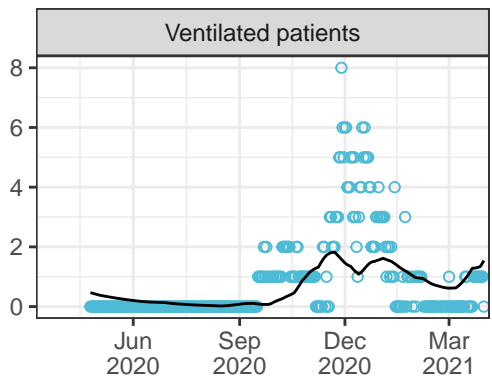

## SK Mönchengladbach

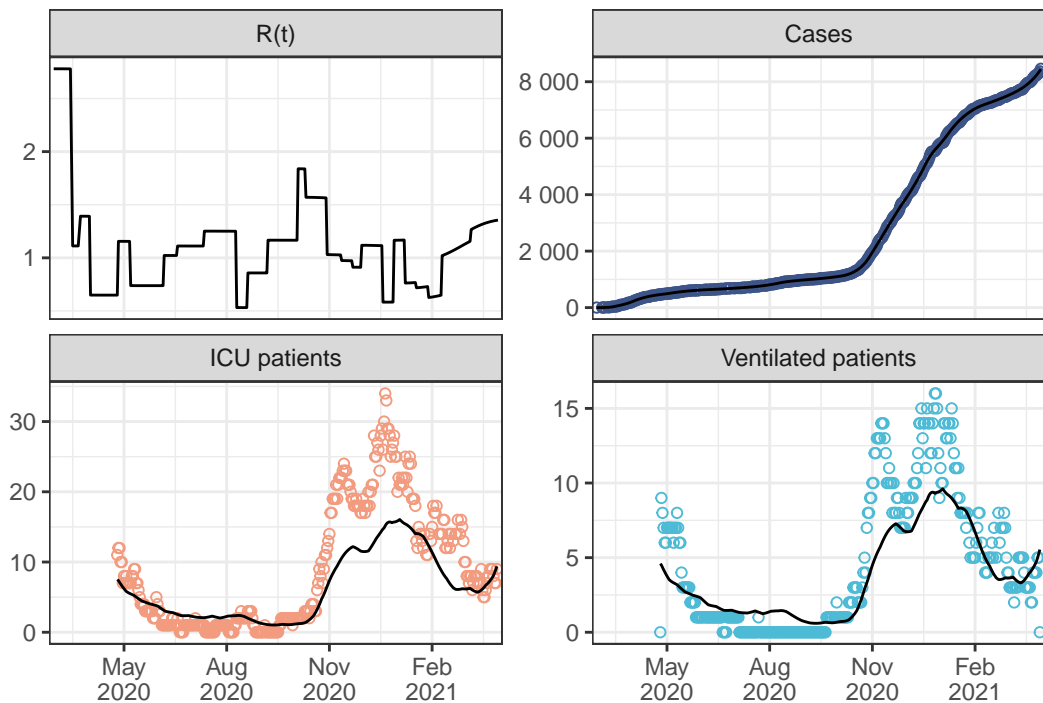

## SK Mülheim a.d.Ruhr

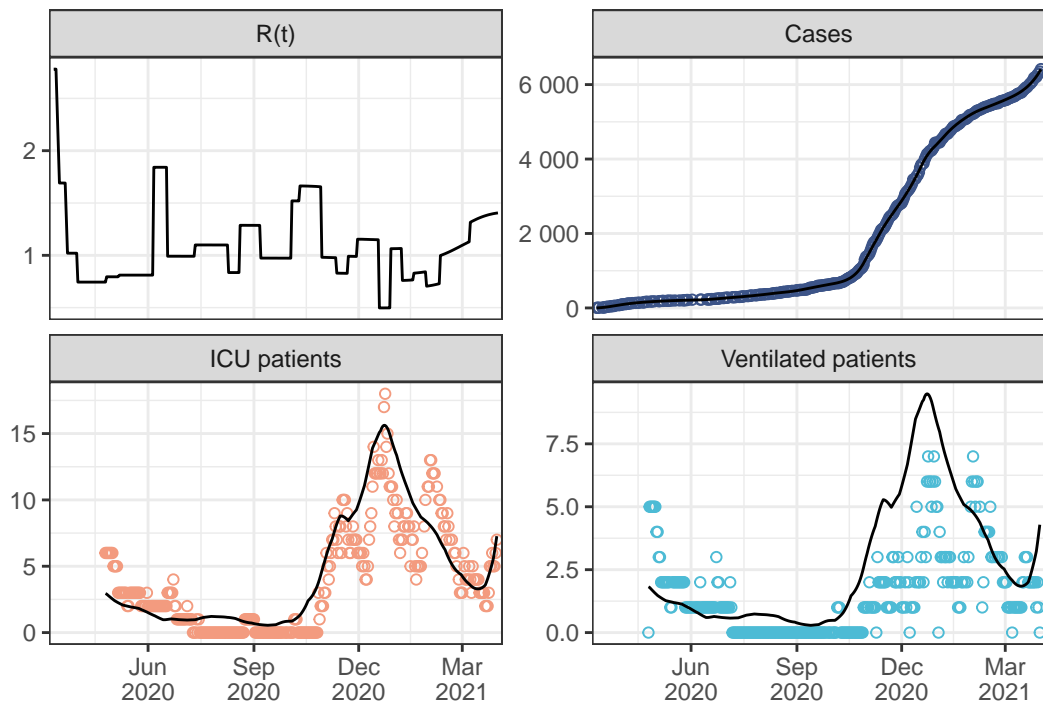

## SK München

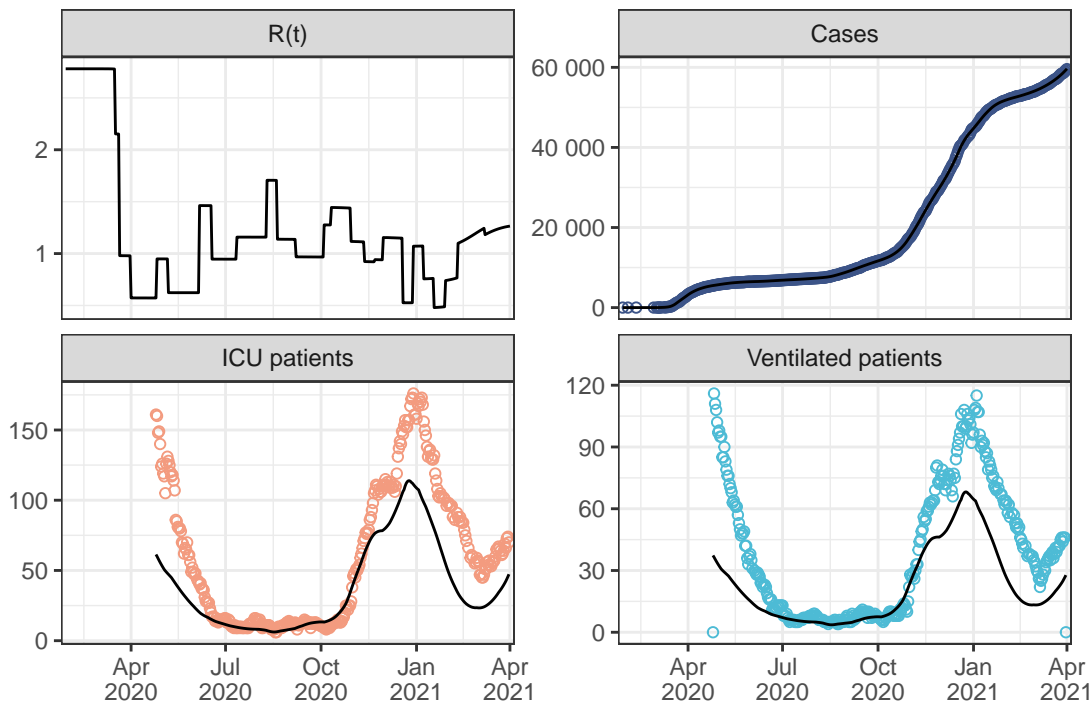

## SK Münster

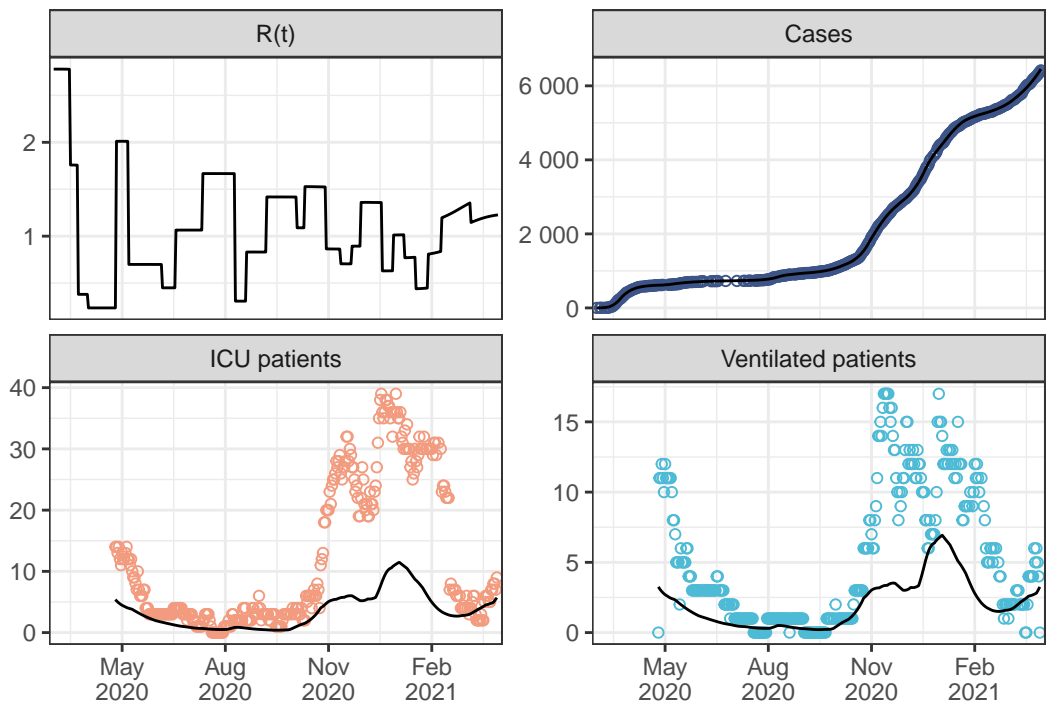

## SK Neumünster

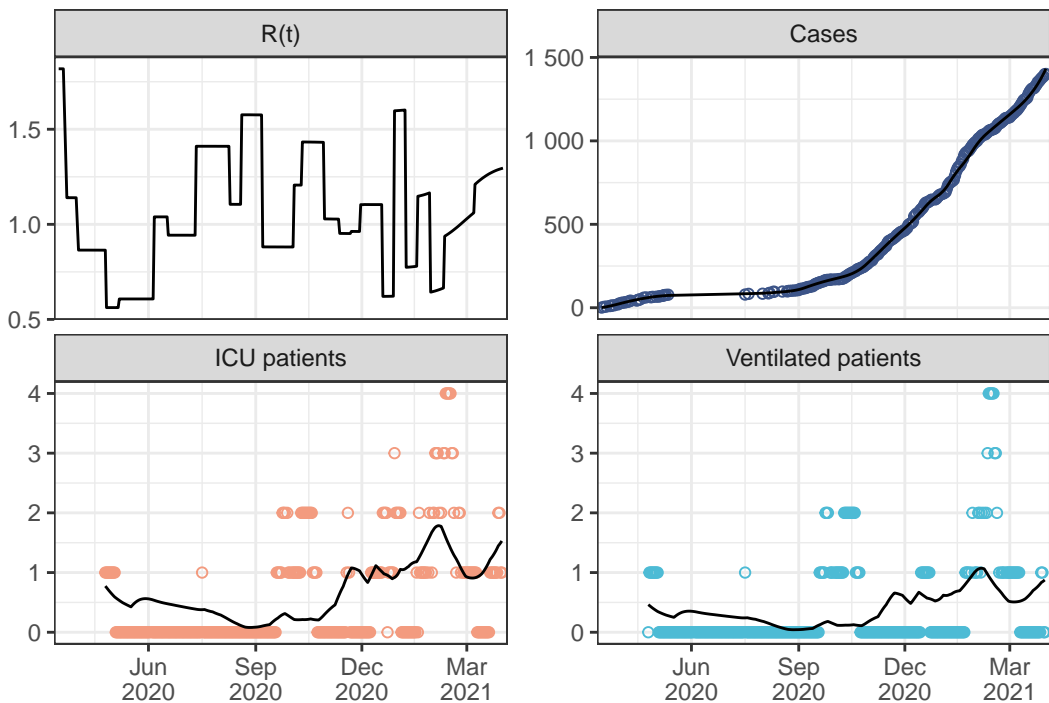

## SK Neustadt a.d.Weinstraße

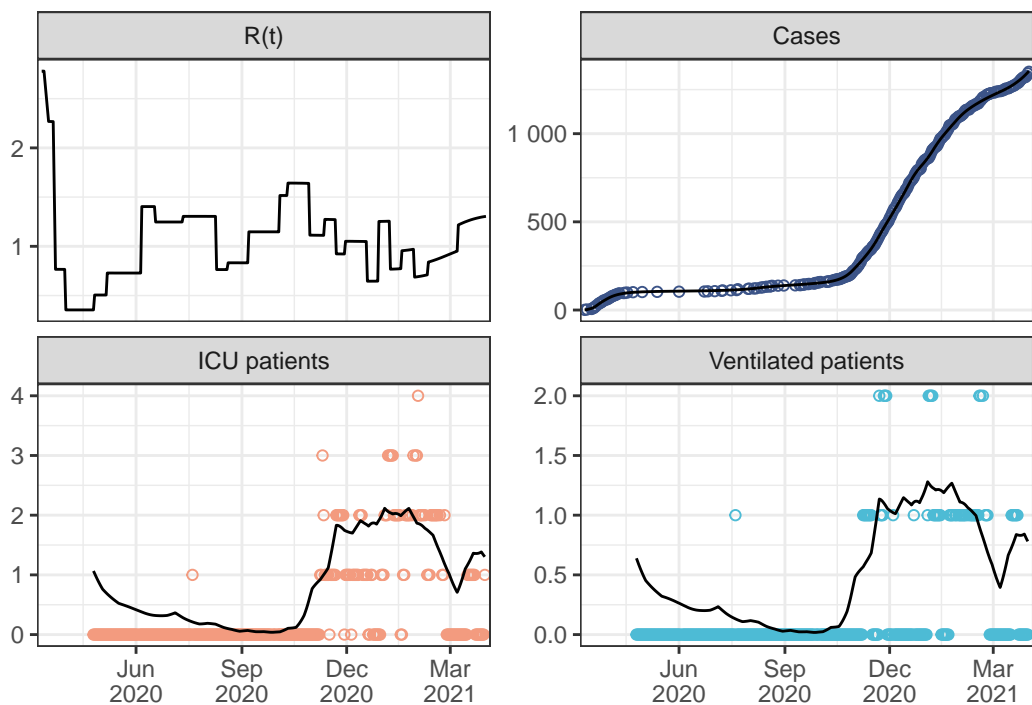

## SK Nürnberg

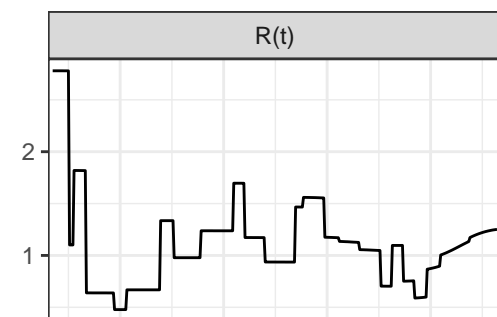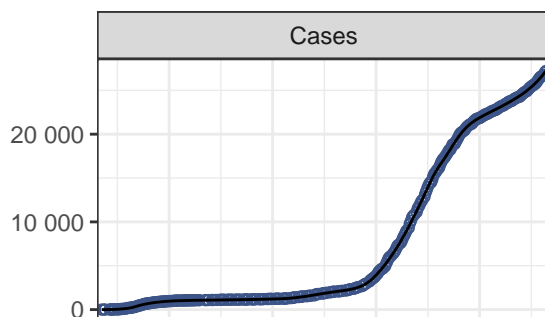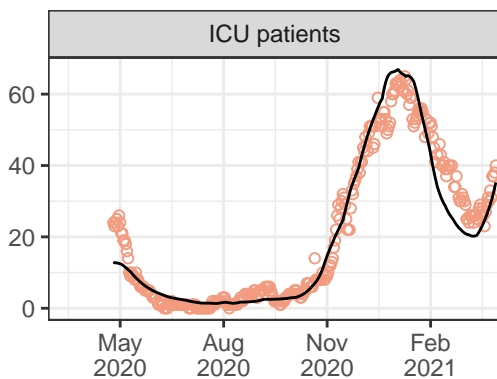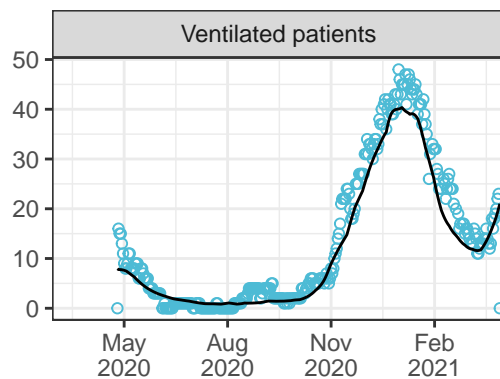

## SK Oberhausen

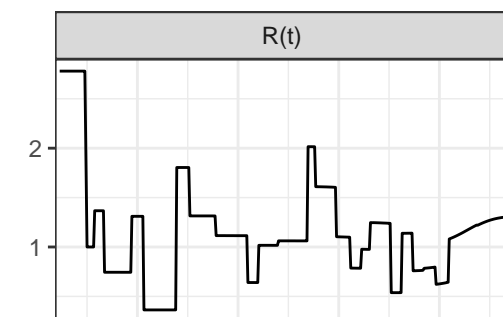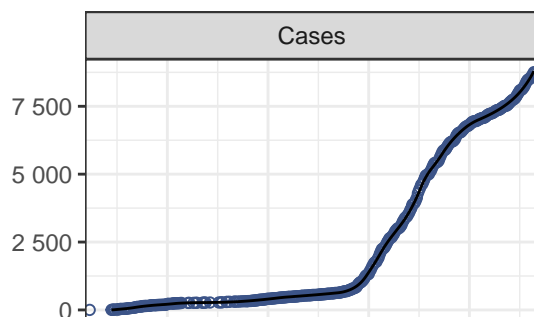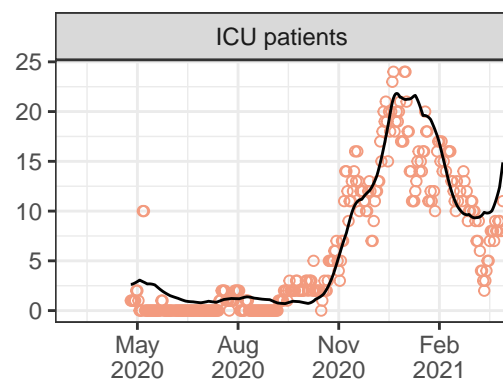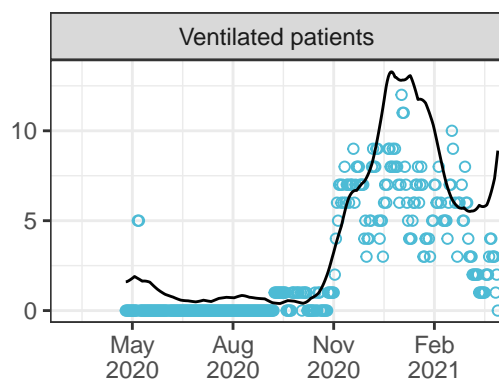

## SK Offenbach

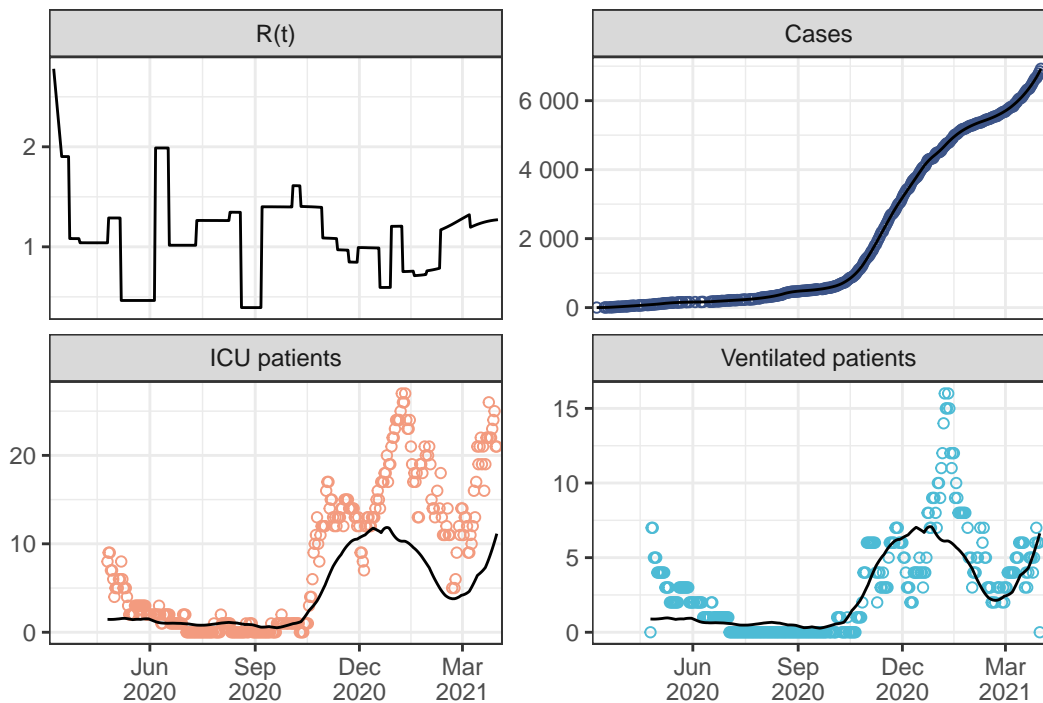

## SK Oldenburg

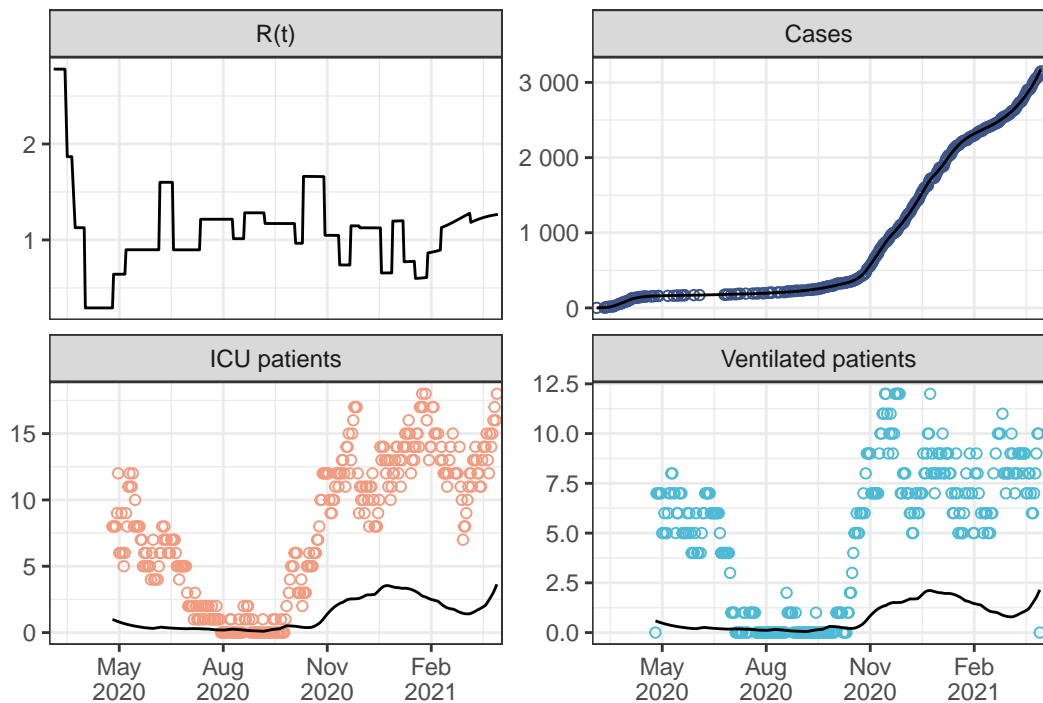

## SK Osnabrück

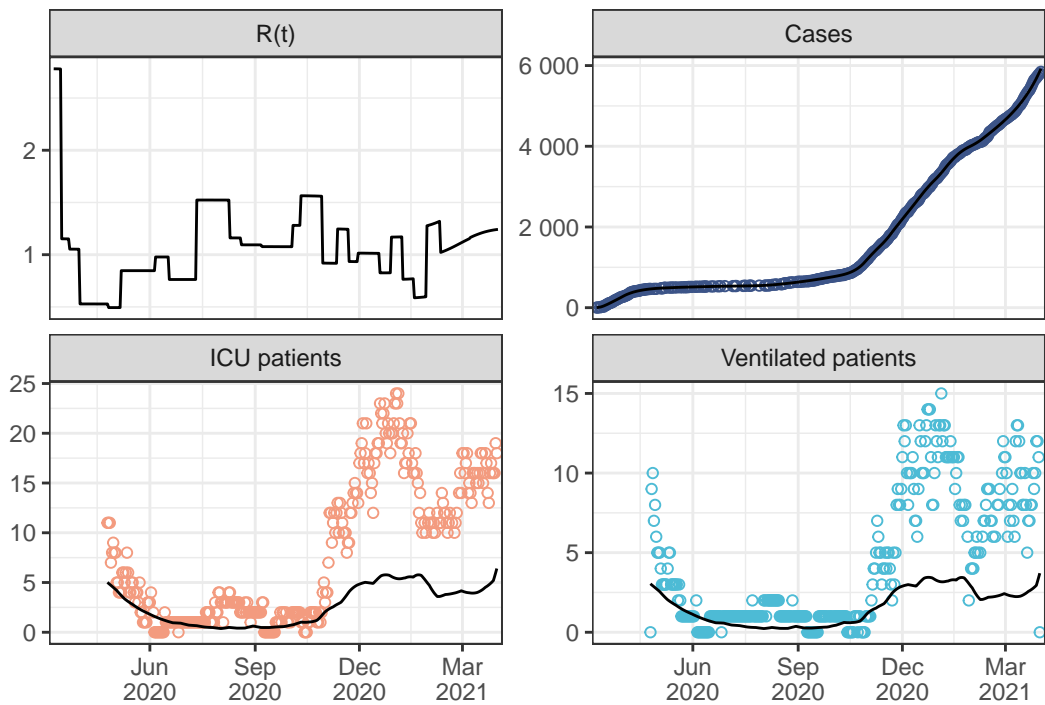

## SK Passau

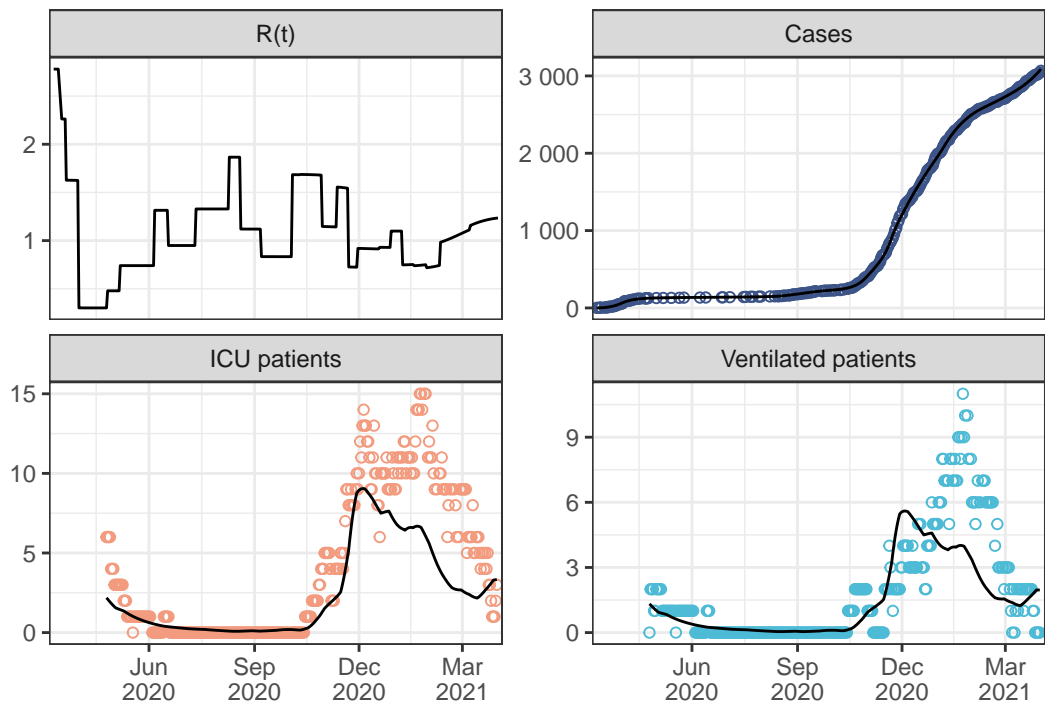

## SK Pforzheim

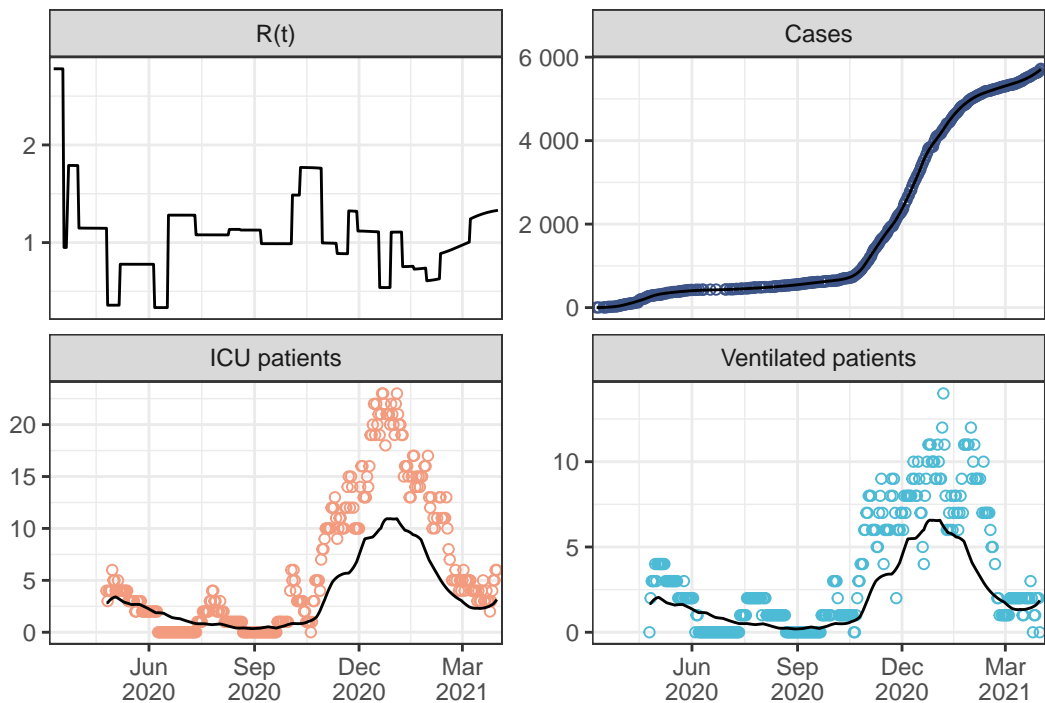

## SK Pirmasens

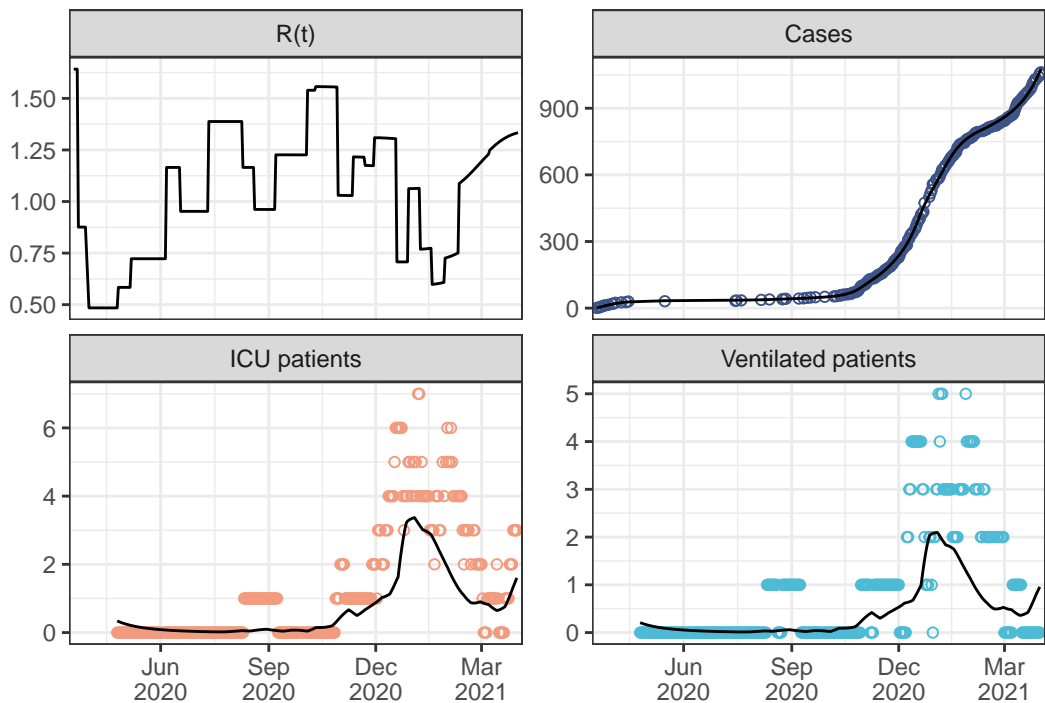

## SK Potsdam

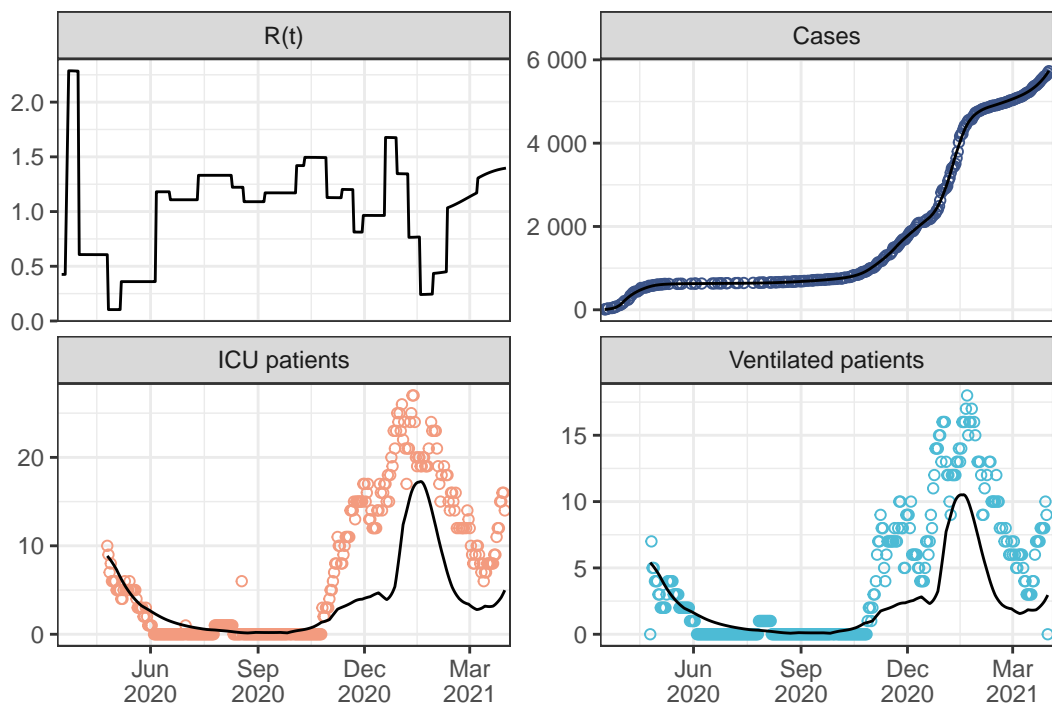

## SK Regensburg

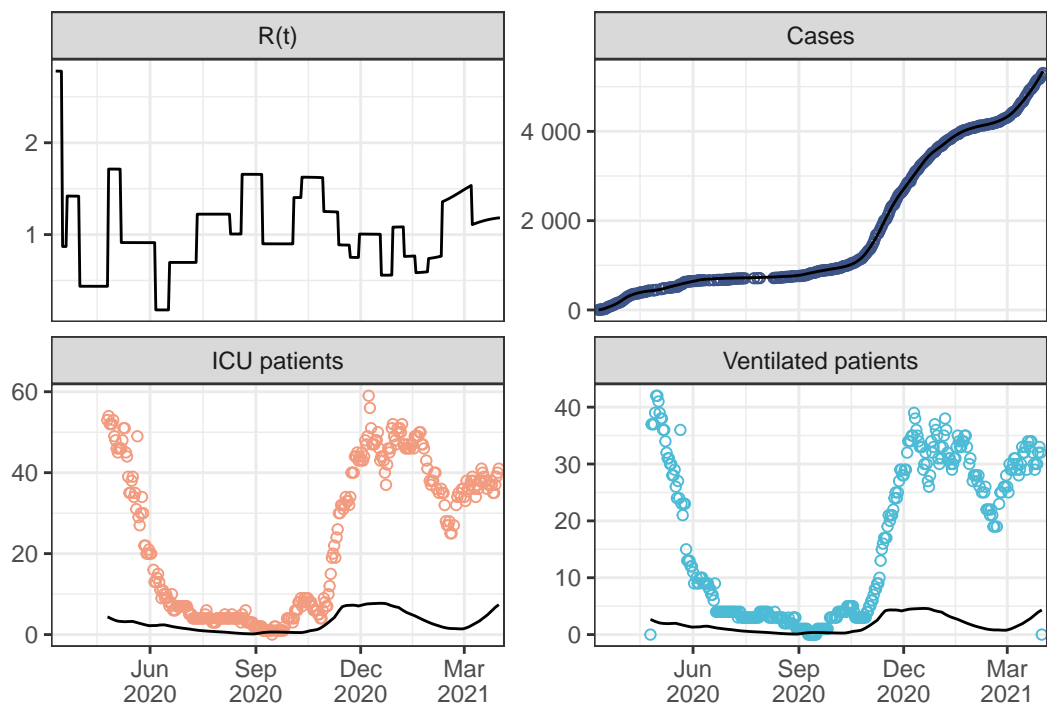

## SK Remscheid

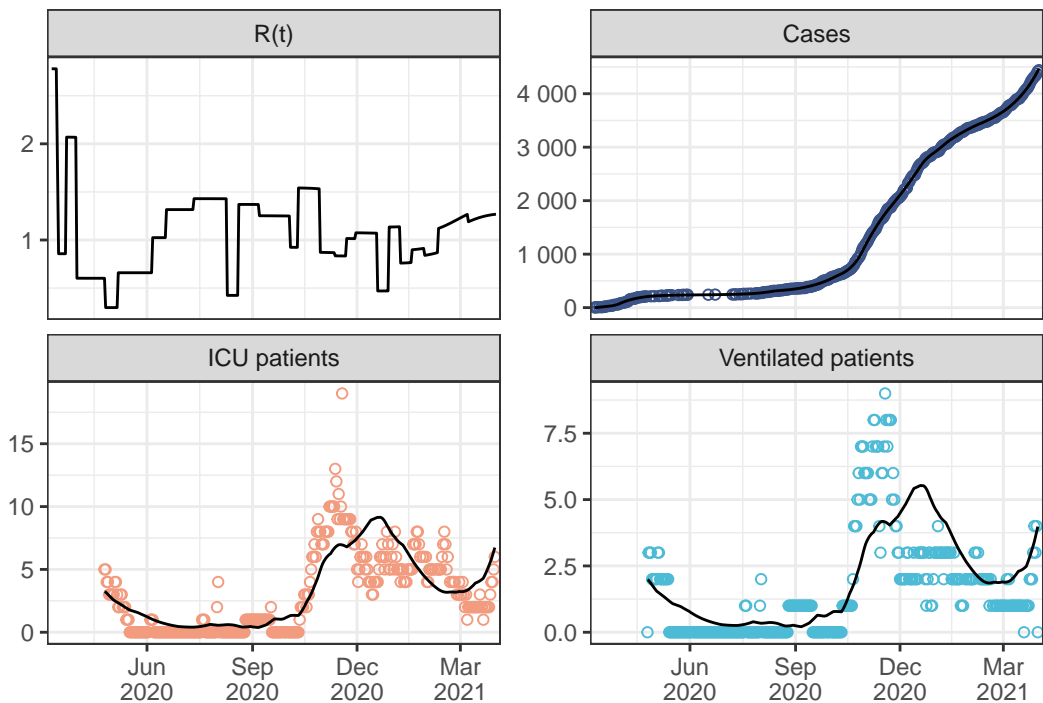

## SK Rosenheim

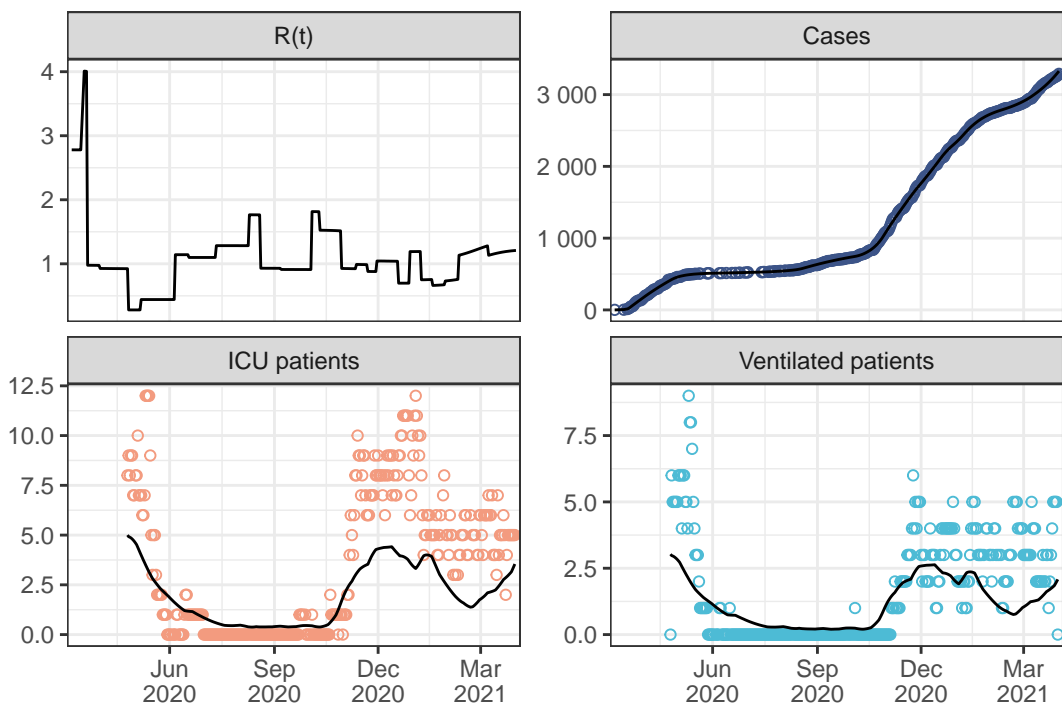

## SK Rostock

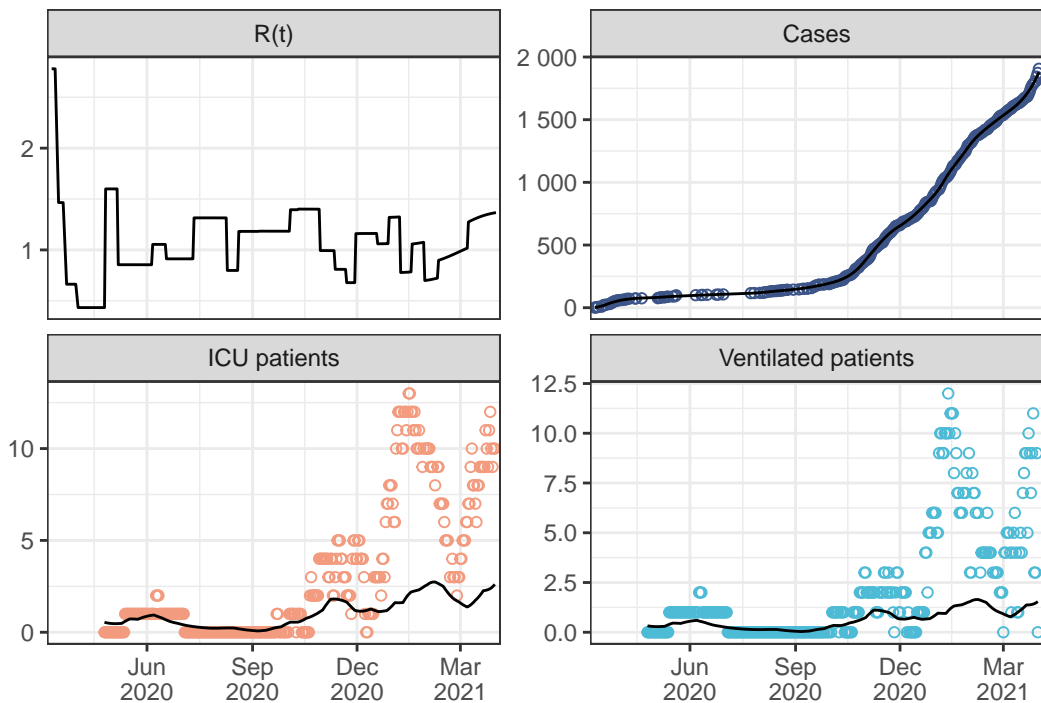

## SK Salzgitter

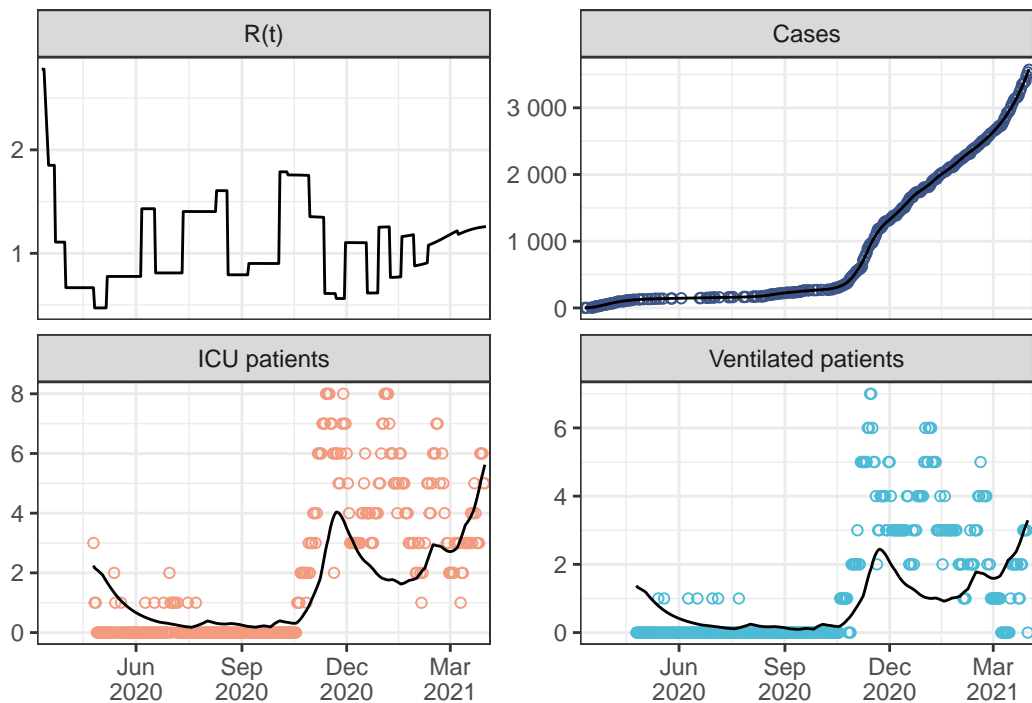

## SK Schwabach

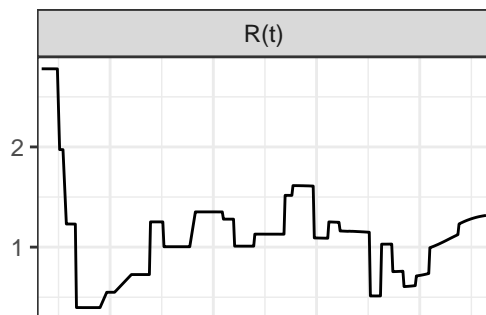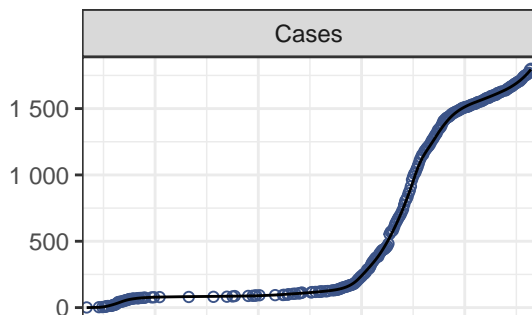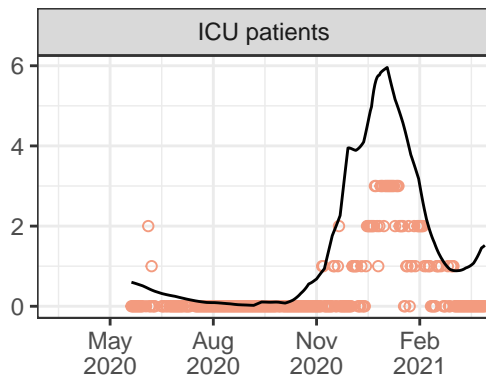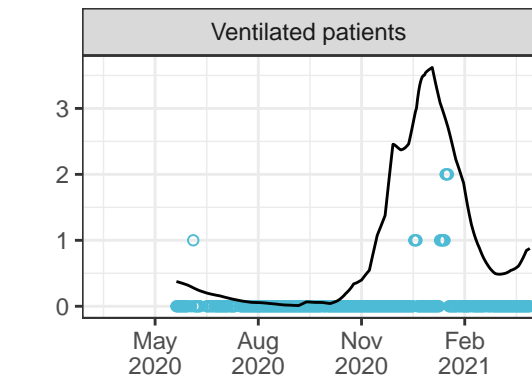

## SK Schweinfurt

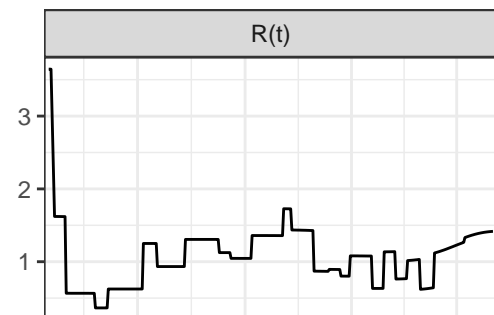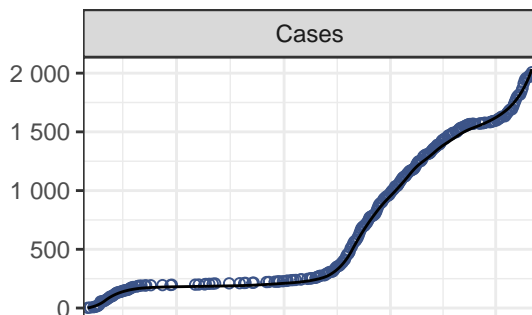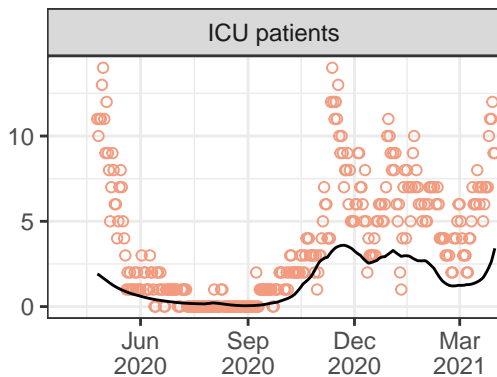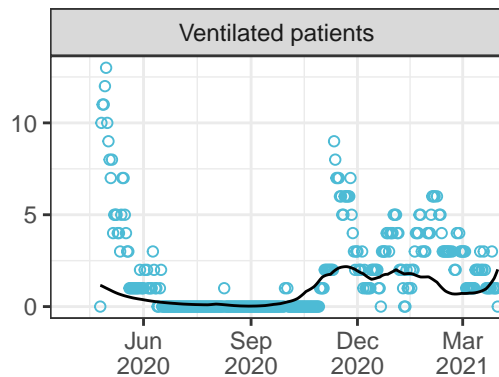

## SK Schwerin

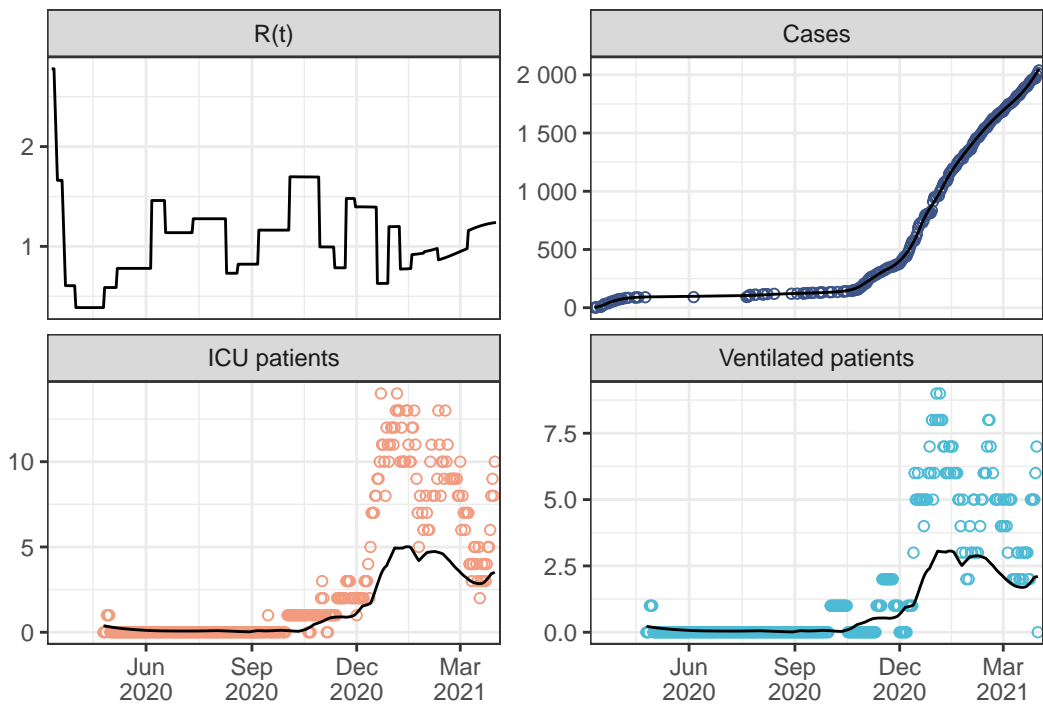

## SK Solingen

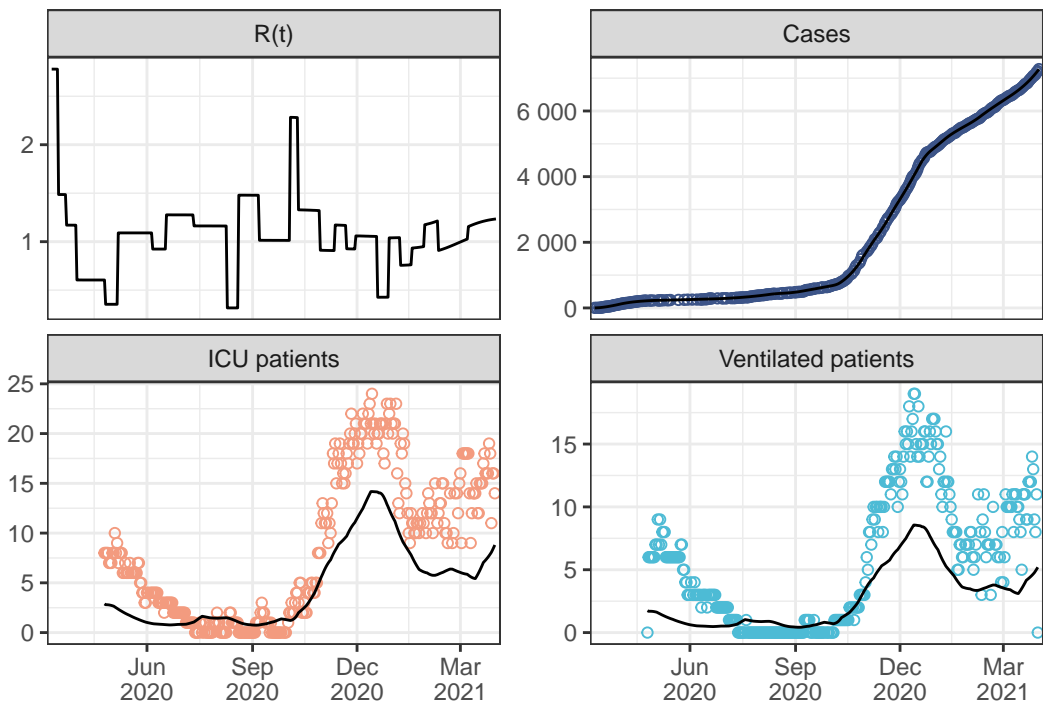

## SK Speyer

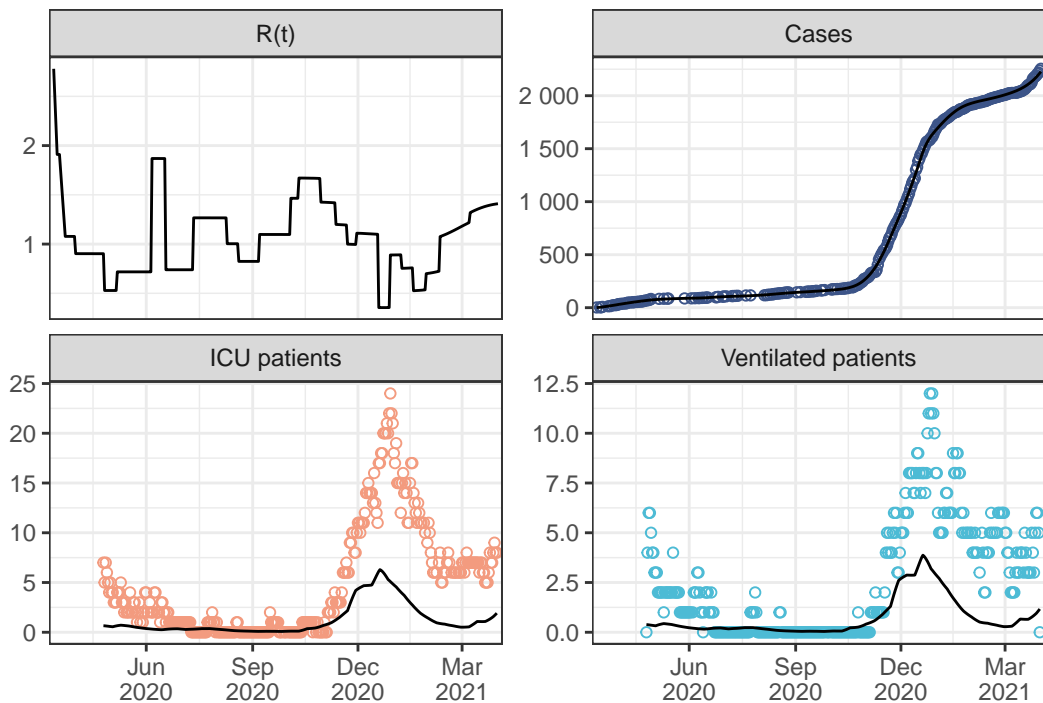

## SK Straubing

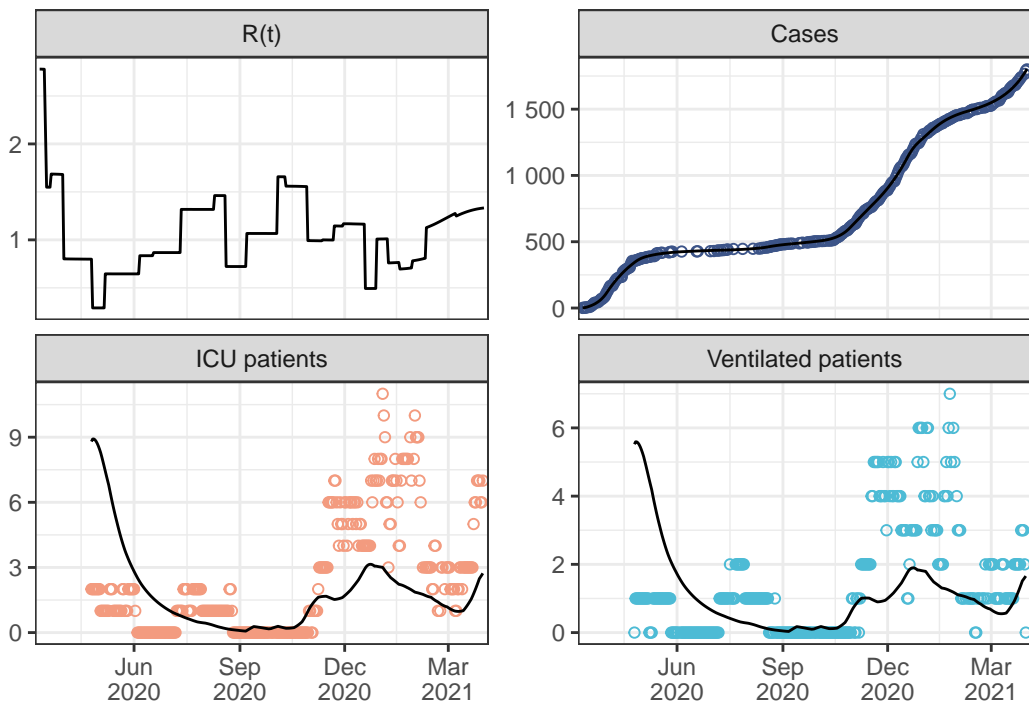

## SK Stuttgart

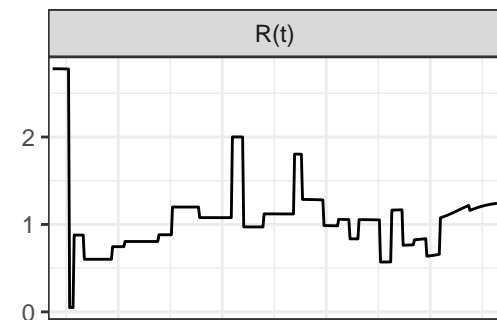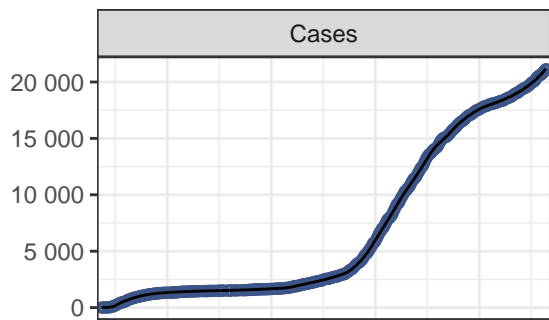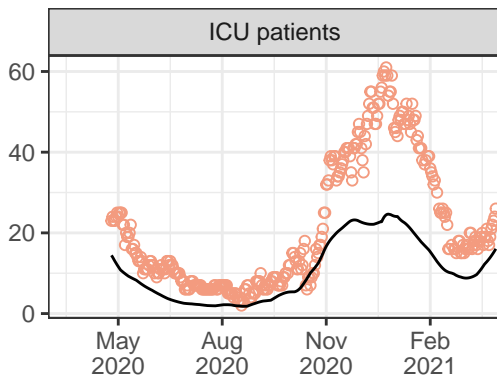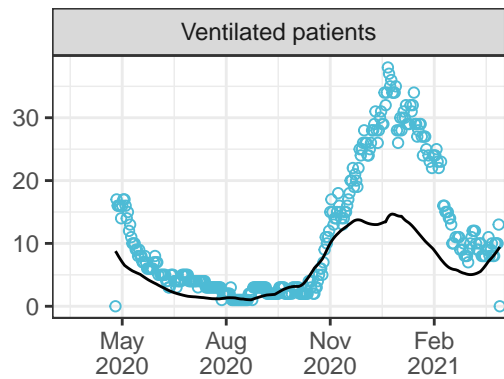

## SK Suhl

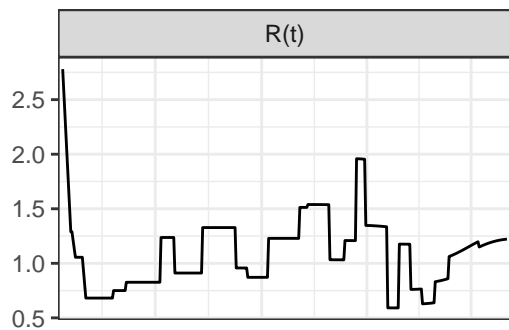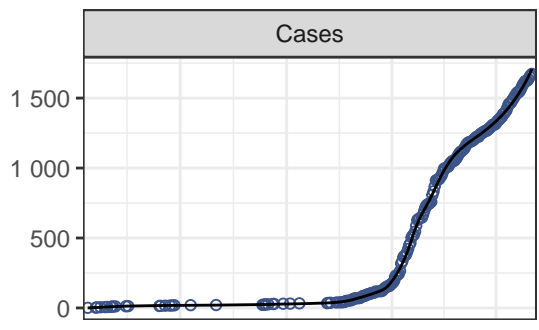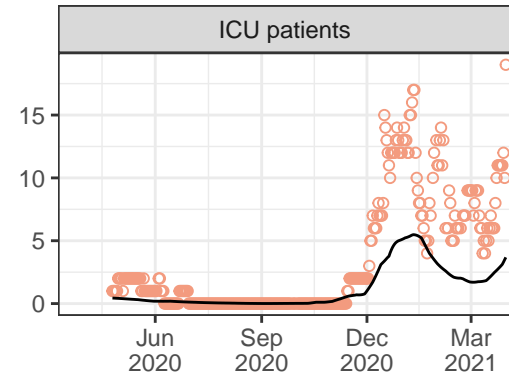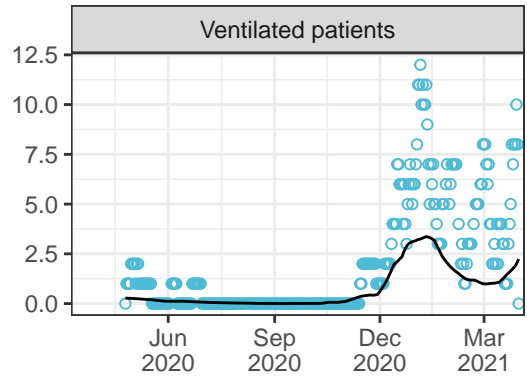

## SK Trier

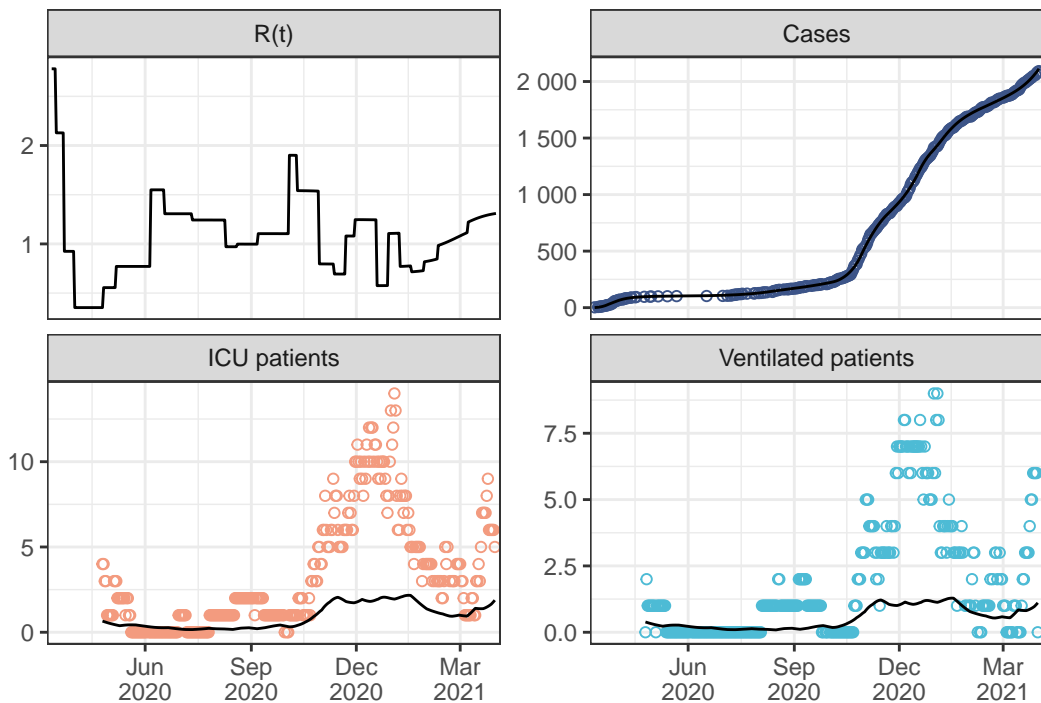

## SK Ulm

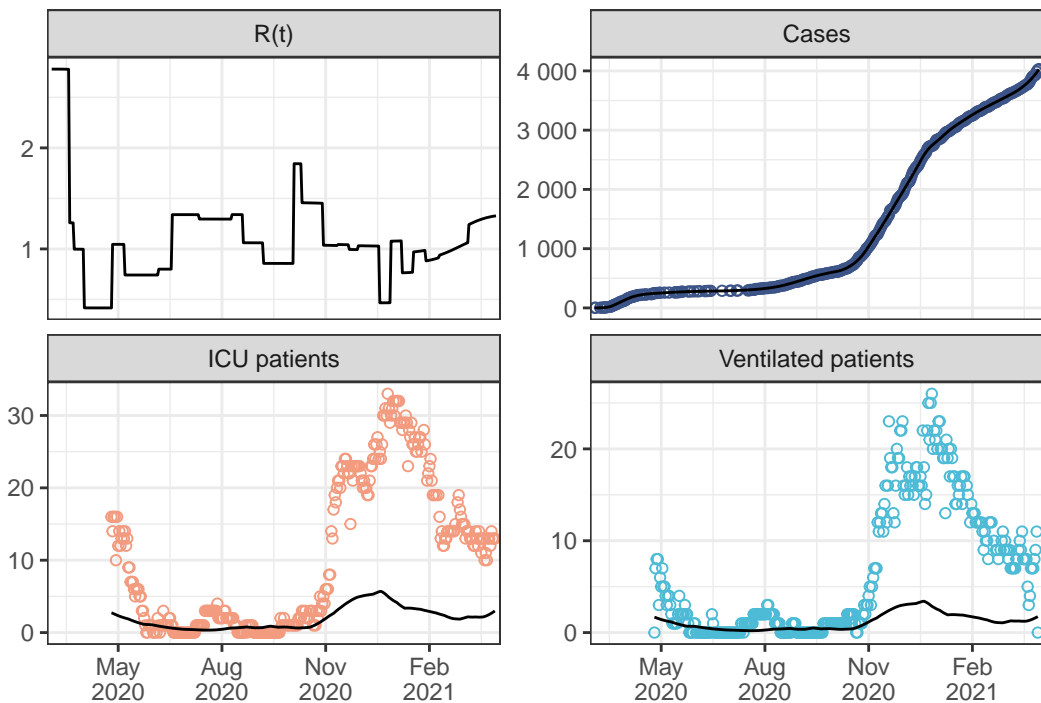

## SK Weiden i.d.OPf.

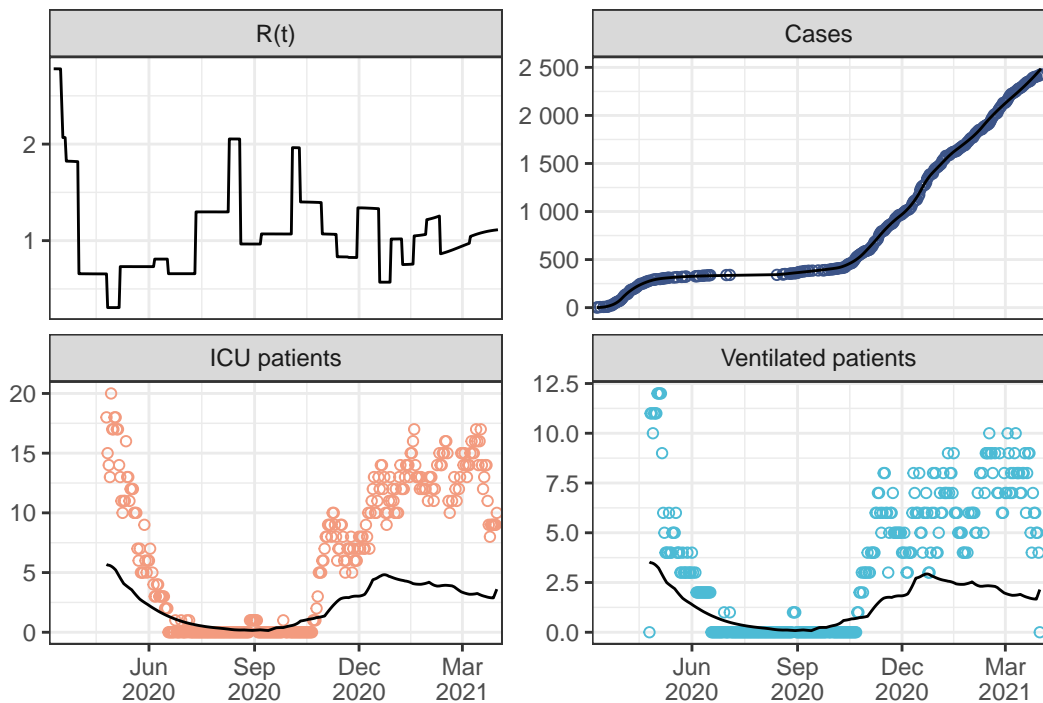

## SK Weimar

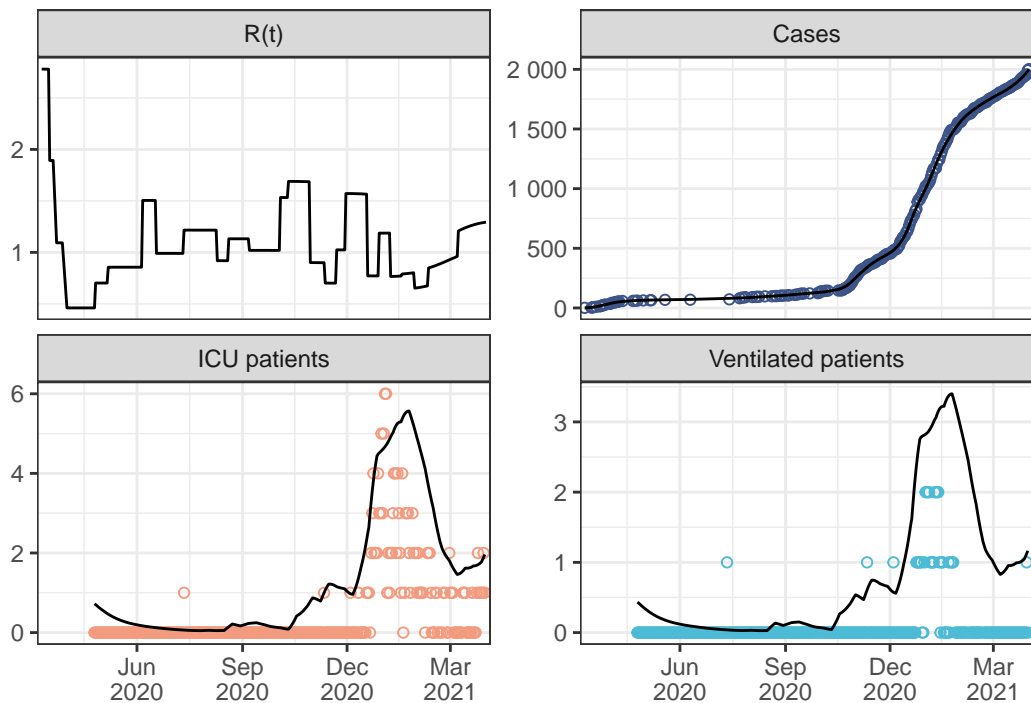

## SK Wiesbaden

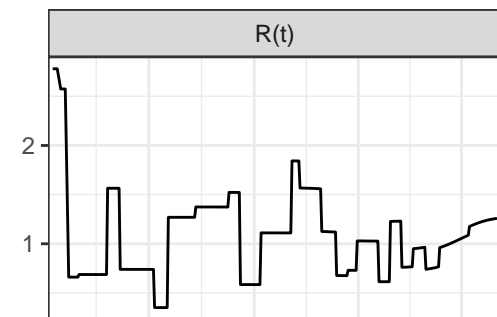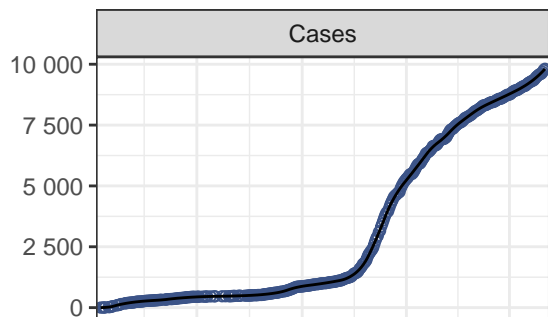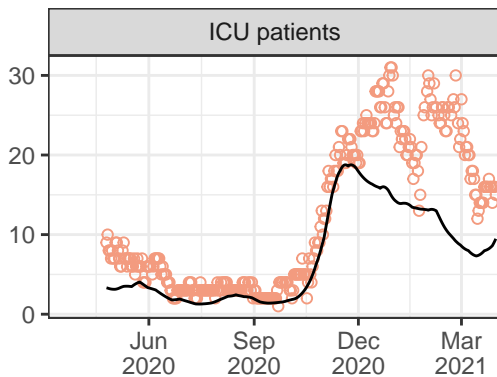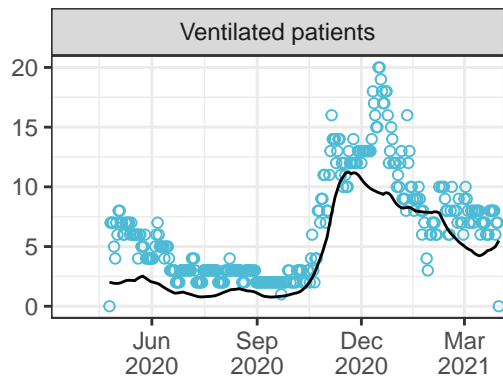

## SK Wilhelmshaven

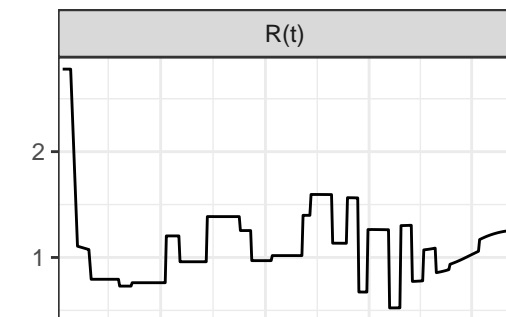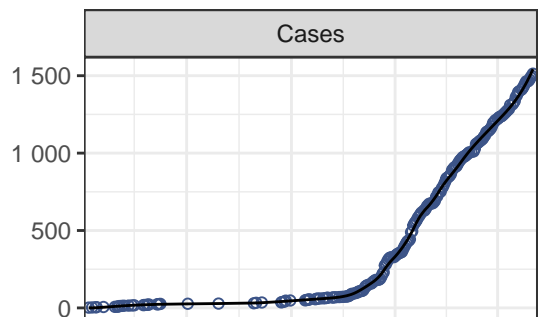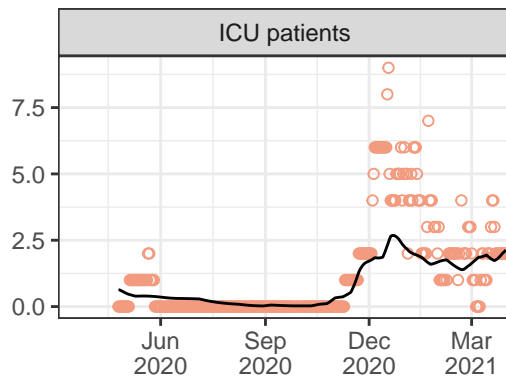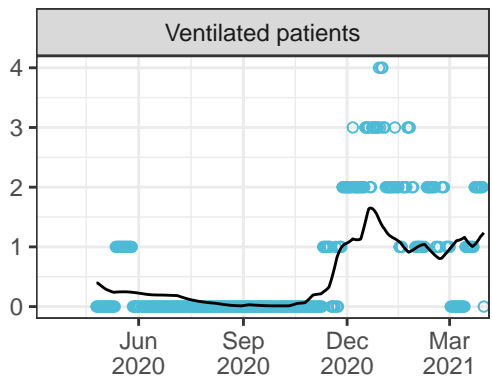

## SK Wolfsburg

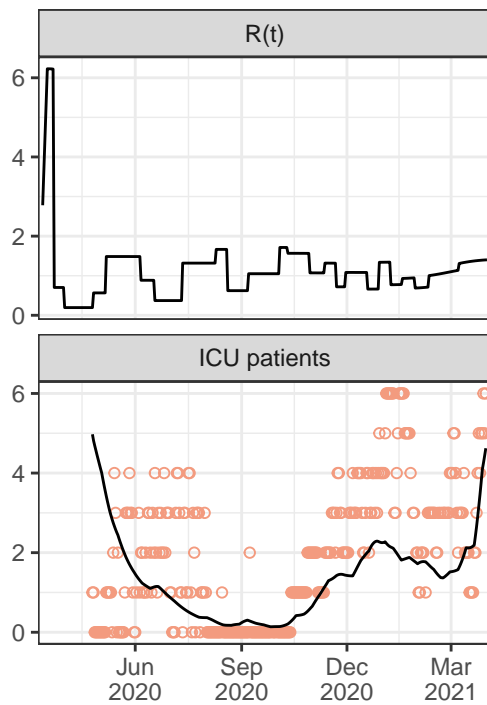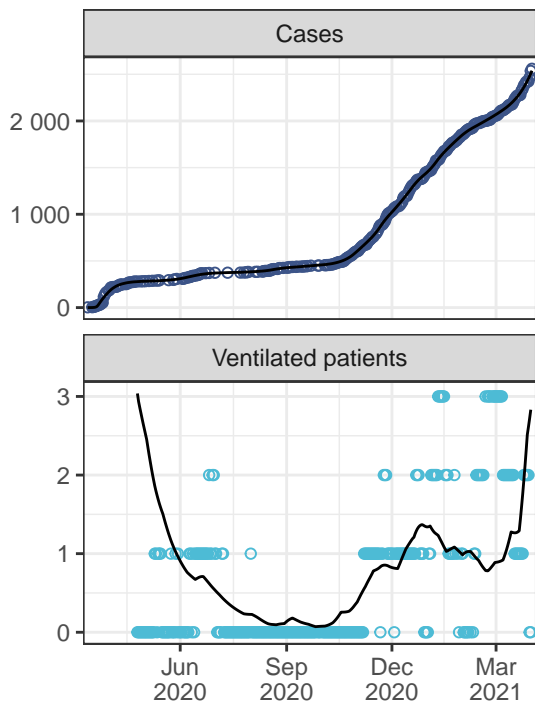

## SK Worms

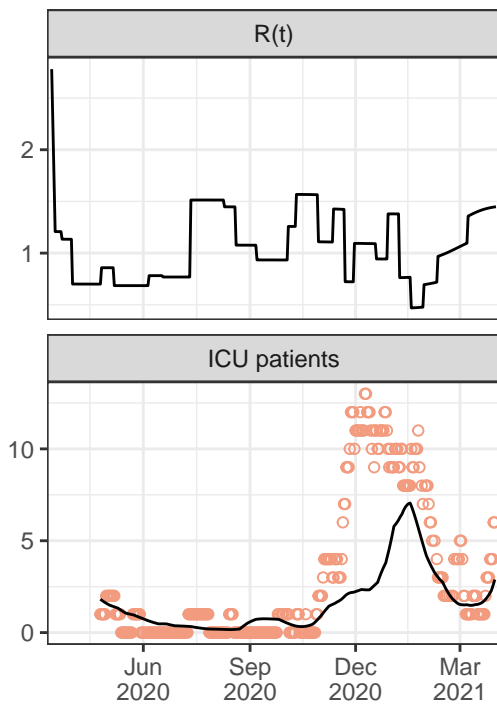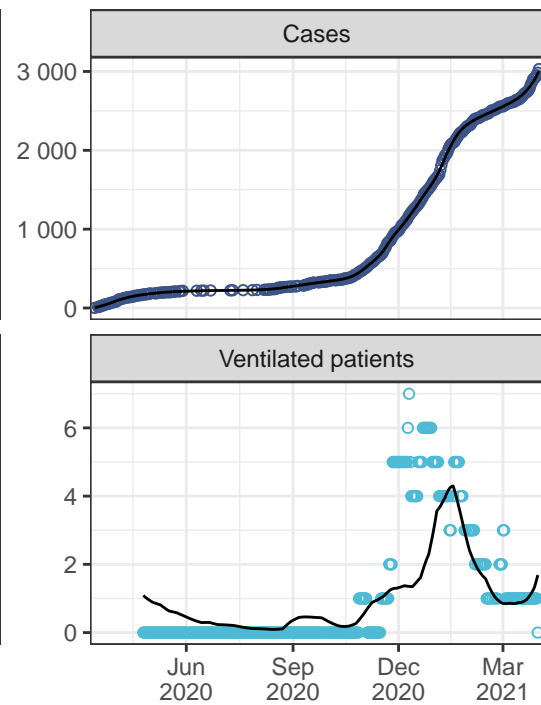

## SK Wuppertal

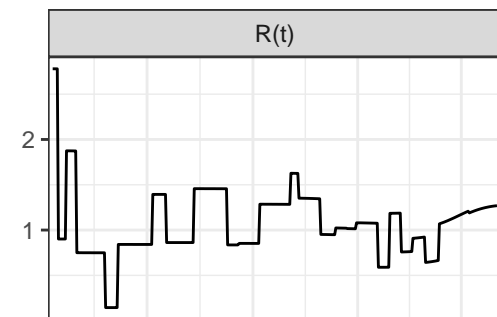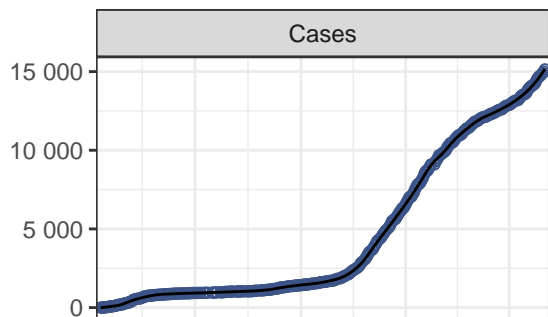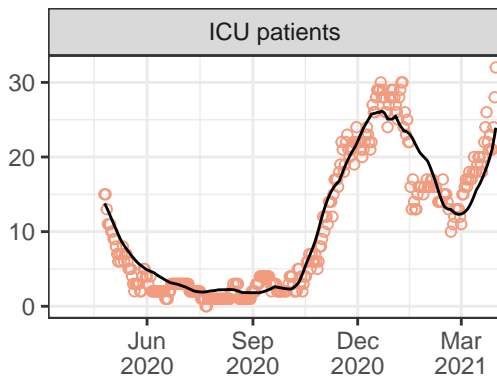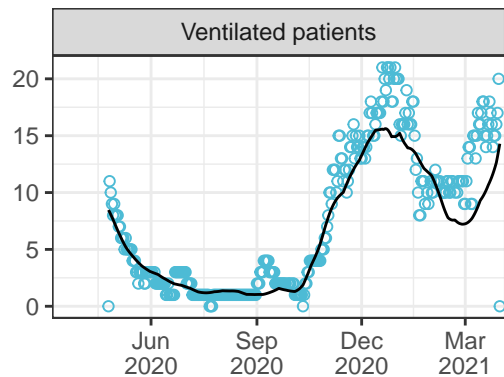

## SK Würzburg

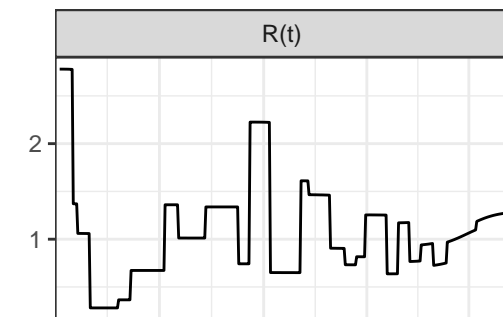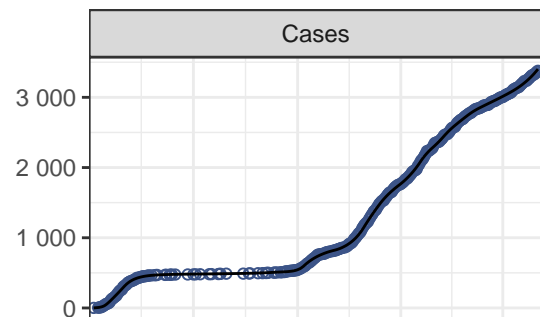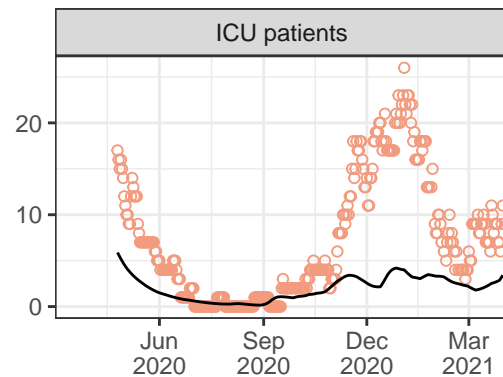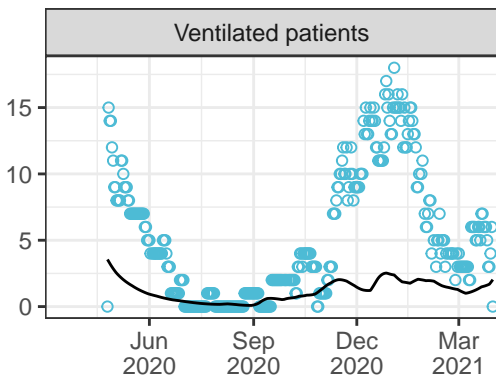

## SK Zweibrücken

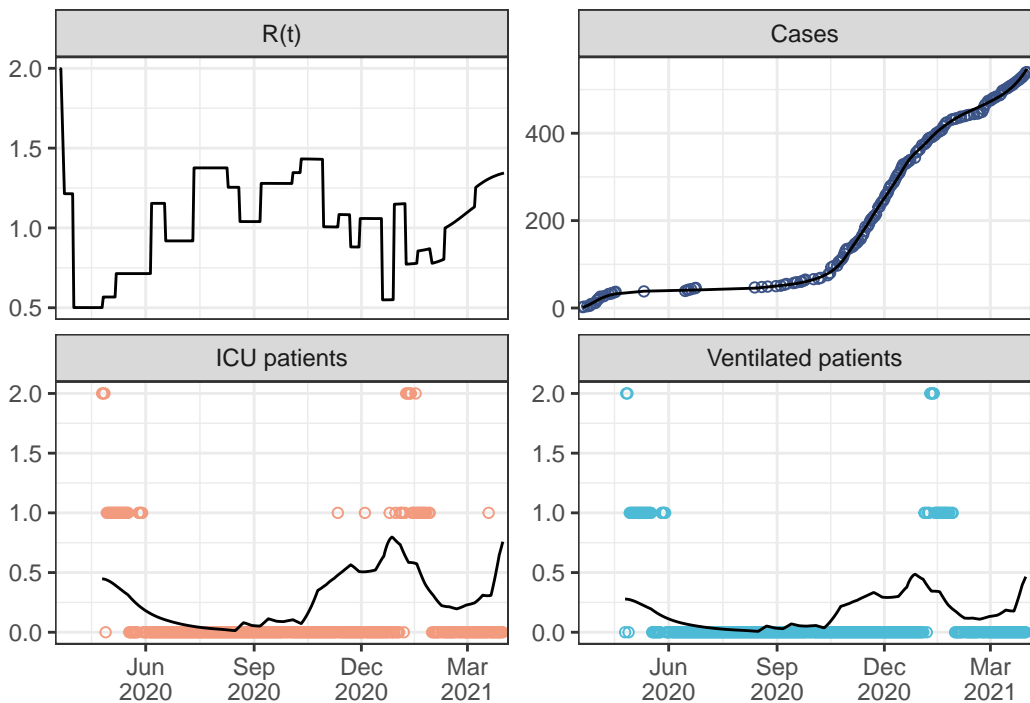

## StadtRegion Aachen

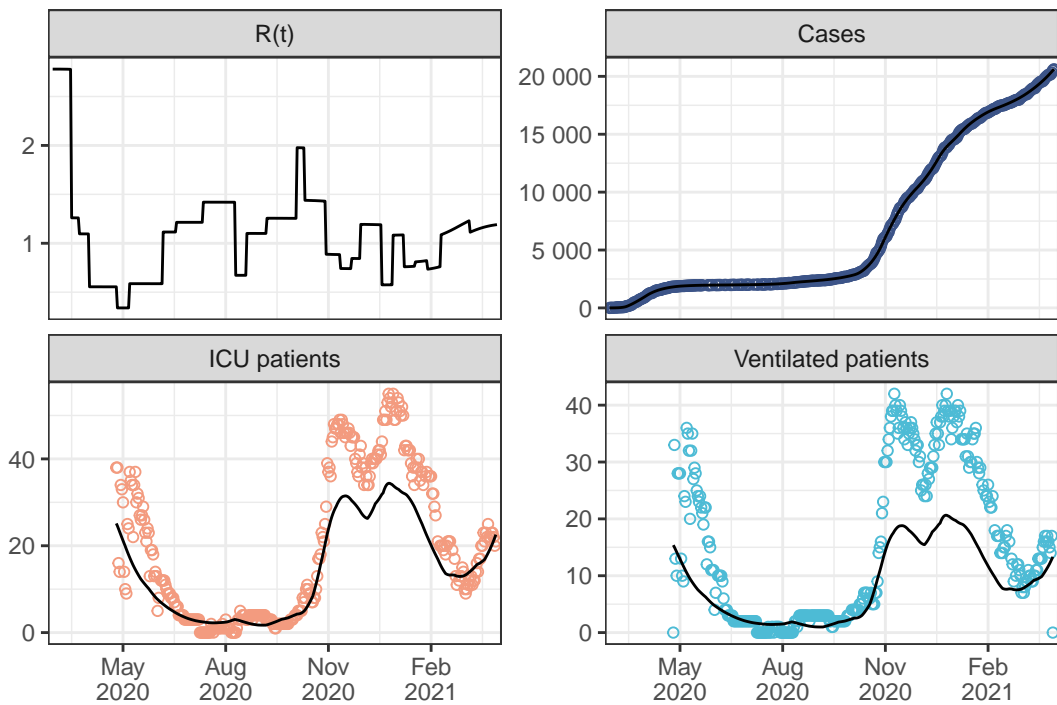

Supplement: s1 [file s1]
