# Supplementary material for: Model-Based Analysis of SARS-CoV-2 Infections, Hospitalization and Outcome in Germany, the Federal States and Districts
Source: MDPI journal article supplement (doi:10.3390/v14102114), 2022-09-24
Supplement: s1 [file s1]

Attached as PDF: Figure S1.pdf

**Figure S1.** Descriptive performance plots for Germany and all federal states. Points: observations, lines: model simulations. Information about the number of inpatients was not available for Germany and several federal states.

Attached as PDF: Figure S2.pdf

**Figure S2.** Descriptive performance plots for German districts (NUTS-3). Points: observations, lines: model simulations. Information about the number of ICU and ventilated patients was not available for 4 districts.

Attached as .mod-file: ModelFile S1.mod

**Model File S1.** NONMEM model file of the infectiousness model

Attached as .mod-file: ModelFile S2. mod

**Model File S2.** NONMEM model file of the full model

#### Supplementary Table S1. Data Sources

| Area                       | Data                                              | Source                                 |
|----------------------------|---------------------------------------------------|----------------------------------------|
| Germany and federal states | Cases, recoveries, fatalities                     | Berliner Morgenpost [18]               |
| Germany and federal states | ICU with and without ventilation                  | DIVI Intensivregister [33]             |
| Germany and federal states | Number of tests and positive rates                | RKI [19]                               |
| German districts           | Cases with age groups and sex distribution        | RKI [19]                               |
| German districts           | ICU with and without ventilation                  | RKI documentation of DIVI data [34]    |
| Bavaria                    | Occupied hospital beds                            | Bavarian government [20]               |
| Berlin                     | Occupied hospital beds and daily hospitalizations | Berlin government [21]                 |
| Brandenburg                | Occupied hospital beds                            | Brandenburg government [25]            |
| Bremen                     | Occupied hospital beds                            | Bremen government [26]                 |
| Hamburg                    | Occupied hospital beds                            | Hamburg government [27]                |
| Hesse                      | Occupied hospital beds and daily hospitalizations | Hesse government, via email            |
| Lower Saxony               | Occupied hospital beds                            | Lower Saxony government [28]           |
| Mecklenburg-Vorpommern     | Occupied hospital beds and daily hospitalizations | Mecklenburg-Vorpommern government [29] |
| North Rhine-Westphalia     | Occupied hospital beds and daily hospitalizations | North Rhine-Westphalia government [30] |

|                      |                                                   |                                              |
|----------------------|---------------------------------------------------|----------------------------------------------|
| Rhineland-Palatinate | Occupied hospital beds and daily hospitalizations | Rhineland-Palatinate government, via email   |
| Rhineland-Palatinate | Daily hospitalizations                            | Rhineland-Palatinate government [31]         |
| Saarland             | Occupied hospital beds                            | Saarland government, via email               |
| Saxony               | Occupied hospital beds                            | Saxony government [32]                       |
| Saxony-Anhalt        | Daily hospitalizations                            | Saxony-Anhalt government [22]                |
| Schleswig-Holstein   | Occupied hospital beds and daily hospitalizations | Christian-Albrechts-Universität zu Kiel [23] |
| Thuringia            | Daily hospitalizations                            | Thuringia government [24]                    |

**Table S2.** Summary of the clinical database. Age is summarized as median and interquartile range.

|             | <b>Total inpatients</b> | <b>General ward patients</b> | <b>ICU patients</b> | <b>ICU patients not ventilated</b> | <b>ICU patients ventilated</b> |
|-------------|-------------------------|------------------------------|---------------------|------------------------------------|--------------------------------|
| N           | 28847                   | 23612                        | 5235                | 1727                               | 3508                           |
| Age [years] | 73 (57-83)              | 73 (56-83)                   | 72 (61-80)          | 71 (57-81)                         | 73 (63-80)                     |
| Sex         |                         |                              |                     |                                    |                                |
| Male        | 15300 (53%)             | 11869 (50%)                  | 3431 (66%)          | 1078 (62%)                         | 2353 (67%)                     |
| Female      | 13547 (47%)             | 11743 (50%)                  | 1804 (34%)          | 649 (38%)                          | 1155 (33%)                     |
| Fatalities  | 6913 (24%)              | 4204 (18%)                   | 2709 (52%)          | 412 (24%)                          | 2297 (65%)                     |

**Table S3.** Changes in infectiousness ( $R_t$ ) according to NPIs and model estimated changepoints (CP).

| <b>Date of CP</b> | <b>NPI/Explanation for change in infectiousness</b>                                                                                                                                                                                                         | <b>Model estimated CP</b> | <b><math>R_t</math> Germany (lowest – highest in federal states)</b> | <b>Relative Change</b> | <b>Inter-state variability [%CV]</b> |
|-------------------|-------------------------------------------------------------------------------------------------------------------------------------------------------------------------------------------------------------------------------------------------------------|---------------------------|----------------------------------------------------------------------|------------------------|--------------------------------------|
| Initial R         | No NPIs in action                                                                                                                                                                                                                                           | -                         | 2.78                                                                 | -                      | -                                    |
| 16-19 Mar 2020    | School closure (differs between federal states)                                                                                                                                                                                                             | No                        | 1.92 (1.37-2.79)                                                     | -31%                   | 18.7%                                |
| 21-23 Mar 2020    | Curfew or restraining order (differs between federal states)                                                                                                                                                                                                | No                        | 1.1 (0.70-1.83)                                                      | -43%                   | 24.1%                                |
| 1 Apr 2020        | No distinguishable NPIs, might be accountable to a raised awareness in population                                                                                                                                                                           | Yes                       | 0.64 (0.41-1.13)                                                     | -42%                   | 25.5%                                |
| 26 Apr 2020       | Mandatory face masks in public buildings and public transport becoming effective between 22 and 29 April (differs between federal states); the average $R_t$ in Germany is stable, however, there are significant changes between the federal state $R_t$ s | Yes                       | 0.64 (0.29-1.05)                                                     | 0%                     | 36.7%                                |
| 7 May 2020        | Lifting of some restrictions on 6 May                                                                                                                                                                                                                       | Yes                       | 0.72 (0.50-1.07)                                                     | +13%                   | 21.7%                                |

|             |                                                                                                                                       |     |                     |      |       |
|-------------|---------------------------------------------------------------------------------------------------------------------------------------|-----|---------------------|------|-------|
| 6 Jun 2020  | Local hotspots with many infected individuals while the total number of weekly cases is low leading to local short term changes of Rt | Yes | 1.08<br>(0.55-2.01) | +51% | 40.6% |
| 18 Jun 2020 | Local hotspots with many infected individuals while the total number of weekly cases is low leading to local short term changes of Rt | Yes | 0.86<br>(0.58-1.35) | -21% | 27.2% |
| 12 Jul 2020 | Many infections among travelers returning to Germany                                                                                  | Yes | 1.33<br>(1.19-1.58) | +55% | 6.9%  |
| 10 Aug 2020 | Obligatory PCR test for travelers since 8 August                                                                                      | Yes | 1.05<br>(0.57-1.70) | -21% | 34.1% |
| 20 Aug 2020 | Various local increases or liftings of restrictions over the course of August -September                                              | Yes | 0.95<br>(0.68-1.33) | -10% | 31.6% |
| 7 Sep 2020  | Various local increases or liftings of restrictions over the course of August -September                                              | Yes | 1.25<br>(0.99-1.50) | +32% | 10.2% |
| 4 Oct 2020  | -                                                                                                                                     | Yes | 1.51<br>(1.07-2.18) | +21% | 18.3% |
| 12 Oct 2020 | 14 October new local resolution for counties with high incidence                                                                      | Yes | 1.55<br>(1.34-1.81) | +3%  | 6.3%  |
| 28 Oct 2020 | Resolution of "Lockdown light"                                                                                                        | Yes | 1.12<br>(0.92-1.44) | -28% | 11.3% |
| 6 Nov 2020  | Resolutions of "Lockdown light" effective on 2 November                                                                               | Yes | 1.00<br>(0.75-1.31) | -11% | 12.6% |
| 19 Nov 2020 | New infection protection law resolved on 18 November                                                                                  | Yes | 0.98<br>(0.75-1.36) | -2%  | 15.1% |
| 30 Nov 2020 | -                                                                                                                                     | Yes | 1.2<br>(1.1-1.36)   | +25% | 6.2%  |
| 18 Dec 2020 | Further lockdown restrictions in force at 16 December                                                                                 | Yes | 0.67<br>(0.53-0.89) | -45% | 14.6% |
| 28 Dec 2020 | Increase of personal contacts and delay in reporting during the Christmas holidays                                                    | Yes | 1.22<br>(1.08-1.45) | 83%  | 6.3%  |
| 8 Jan 2021  | Further lockdown restrictions in force an 11 January                                                                                  | Yes | 0.80<br>(0.64-0.95) | -35% | 9.3%  |
| 22 Jan 2021 | Differing reopening of schools between federal states, 19 January: expansion of federal lockdown until 14 February                    | Yes | 0.82<br>(0.48-1.42) | +4%  | 29%   |
| 29 Jan 2021 | Travel restrictions from countries with high incidence of VOC B.1.1.7 at 30 January                                                   | Yes | 0.76<br>(0.67-0.87) | -8%  | 8.6%  |
| 11 Feb 2021 | Federal government expands lockdown until 7 March; only some restrictions are lifted                                                  | Yes | 0.93<br>(0.82-0.99) | +23% | 6.1%  |
| 8 Mar 2021  | Lifting of several restrictions by the German federal government                                                                      | No  | 0.99<br>(0.94-1.04) | +6%  | 3.9%  |

**Table S4.** Fractions of confirmed cases hospitalized, treated at ICU, ventilated and death rates as functions of age (a) and sex (s) as extracted from the clinical database.

|                                       | Model function | Age group [years] | Female (F) [%] | Male (M) [%] |
|---------------------------------------|----------------|-------------------|----------------|--------------|
| Fraction hospitalized                 | fh(a, s)       | 0 to 4            | 3.02           | 3.70         |
|                                       |                | 5 to 14           | 0.90           | 0.90         |
|                                       |                | 15 to 35          | 2.38           | 1.54         |
|                                       |                | 35 to 59          | 4.45           | 7.45         |
|                                       |                | 60 to 79          | 20.6           | 29.1         |
|                                       |                | 80+               | 29.6           | 50.3         |
| Fraction treated at ICU of inpatients | fi(a, s)       | 0 to 4            | 6.05           | 23.7         |
|                                       |                | 5 to 14           | 5.87           | 19.6         |
|                                       |                | 15 to 35          | 9.64           | 22.2         |
|                                       |                | 35 to 59          | 21.4           | 35.7         |
|                                       |                | 60 to 79          | 35.3           | 54.1         |
|                                       |                | 80+               | 21.4           | 35.1         |
| Fraction ventilated of ICU patients   | fv(a, s)       | 0 to 4            | 30.8           | 30.8         |
|                                       |                | 5 to 14           | 44.4           | 44.4         |
|                                       |                | 15 to 35          | 46.3           | 46.3         |
|                                       |                | 35 to 59          | 60.0           | 60.0         |
|                                       |                | 60 to 79          | 71.9           | 71.9         |
|                                       |                | 80+               | 66.6           | 66.6         |
| Fraction death (general ward)         | fdh(a, s)      | 0 to 34           | 0              | 0            |
|                                       |                | 35 to 59          | 1.25           | 1.25         |
|                                       |                | 60 to 79          | 10.1           | 14.7         |
|                                       |                | 80+               | 33.4           | 41.4         |
| Fraction death (ICU not ventilated)   | fdi(a, s)      | 0 to 34           | 0              | 0            |
|                                       |                | 35 to 59          | 4.53           | 4.53         |
|                                       |                | 60 to 79          | 19.4           | 19.4         |
|                                       |                | 80+               | 33.4           | 33.4         |
| Fraction death (ICU ventilated)       | fdv(a, s)      | 0 to 4            | 0              | 0            |
|                                       |                | 5 to 14           | 25.0           | 25.0         |
|                                       |                | 15 to 35          | 18.0           | 18.0         |
|                                       |                | 35 to 59          | 37.2           | 37.2         |
|                                       |                | 60 to 79          | 65.3           | 65.3         |
|                                       |                | 80+               | 84.1           | 84.1         |
| Fraction death (outpatients)          | fda(a, s)      | 0 to 59           | 0              | 0            |
|                                       |                | 60 to 79          | 1.72           | 2.73         |
|                                       |                | 80+               | 18.3           | 22.6         |

## References

- Corona Zahlen Aktuell: Karte Für Deutschland + Weltweit. Available online: <https://interaktiv.morgenpost.de/corona-virus-karte-infektionen-deutschland-weltweit/> (accessed on 4 August 2022).
- SurvStat@RKI 2.0. Available online: <https://survstat.rki.de/Content/Query/Create.aspx> (accessed on 4 August 2022).

20. Informationen Zu Corona: Häufige Fragen-Bayerisches Staatsministerium Des Innern, Für Sport Und Integration. Available online: <https://www.stmi.bayern.de/miniwebs/coronavirus/lage/index.php> (accessed on 4 August 2022).
21. COVID-19 Berlin. Available online: <https://www.berlin.de/corona/lagebericht/desktop/corona.html#stationäre-behandlung> (accessed on 4 August 2022).
22. Pressemitteilungen|Ministerium Für Soziales, Gesundheit, Integration Und Verbraucherschutz. Available online: <https://msgiv.brandenburg.de/msgiv/de/presse/pressemitteilungen/> (accessed on 4 August 2022).
23. Corona-Fallzahlen-Die Senatorin Für Gesundheit, Frauen Und Verbraucherschutz. Available online: <https://www.gesundheit.bremen.de/corona/zahlen/corona-fallzahlen-37649> (accessed on 4 August 2022).
24. Corona: Zahlen, Fälle, Statistik von COVID-19-Hamburg.De. Available online: <https://www.hamburg.de/corona-zahlen/> (accessed on 4 August 2022).
25. Presseinformationen|Nds. Ministerium Für Soziales, Gesundheit Und Gleichstellung. Available online: [https://www.ms.niedersachsen.de/startseite/service\\_kontakt/presseinformationen/](https://www.ms.niedersachsen.de/startseite/service_kontakt/presseinformationen/) (accessed on 4 August 2022).
26. Daten Zur Corona-Pandemie-LAGuS. Available online: <https://www.lagus.mv-regierung.de/Gesundheit/InfektionsschutzPraevention/Daten-Corona-Pandemie> (accessed on 4 August 2022).
27. NRW-Dashboard Zur Corona-Pandemie. Available online: <https://www.giscloud.nrw.de/corona-dashboard.html> (accessed on 4 August 2022).
28. Coronavirus SARS-CoV-2: Aktuelle Fallzahlen Für Rheinland-Pfalz. Available online: <https://lua.rlp.de/de/presse/detail/news/News/detail/coronavirus-sars-cov-2-aktuelle-fallzahlen-fuer-rheinland-pfalz/> (accessed on 4 August 2022).
29. Infektionsfälle in Sachsen-Coronavirus in Sachsen-Sachsen.De. Available online: <https://www.coronavirus.sachsen.de/infektionsfaelle-in-sachsen-4151.html> (accessed on 4 August 2022).
30. Pressemitteilungen. Available online: <https://ms.sachsen-anhalt.de/presse/pressemitteilungen/> (accessed on 4 August 2022).
31. COVID-19—Institut Für Infektionsmedizin. Available online: <https://www.infmed.uni-kiel.de/de/epidemiologie/covid-19> (accessed on 4 August 2022).
32. TMASGFF: Infektionslage. Available online: <https://www.tmasgff.de/covid-19/fallzahlen> (accessed on 4 August 2022).
33. DIVI Intensivregister. Available online: <https://www.intensivregister.de/#/aktuelle-lage/laendertabelle> (accessed on 4 August 2022).
34. Tagesdaten-CSV Aus Dem DIVI-Intensivregister. Available online: <https://edoc.rki.de/> (accessed on 4 August 2022).
